# Supplementary material for: Dynamic Circadian Protein–Protein Interaction Networks Predict Temporal Organization of Cellular Functions
Source: PLoS Genet. 2013 Mar 28;9(3):e1003398. doi: 10.1371/journal.pgen.1003398 (PMC3610820; doi:10.1371/journal.pgen.1003398)
Supplement: Table S5 — Coupling of biological processes via predicted dynamic PPIs (refers to Figure 6). (XLSX) [file pgen.1003398.s012.xlsx]

## Sheet: Processes circadian PPI network
Entrez gene ID human A	Entrez gene ID human B	Symbol human A	Symbol human B	Entrez gene ID mouse A	Entrez gene ID mouse B	Symbol mouse A	Symbol mouse B	Y2H	MAN	EXT	UNIHI	Clock core	Clock core A	Clock core B	Regulatory component A	Regulatory component B	Interaction source	FDR A (rhythmic transcript)	FDR B (rhythmic transcript)	mRNA peak phase A (circadian time)	mRNA peak phase B (circadian time)	FDR PPI (rhythmic expression)	predicted peak phase PPI (circadian time)	GO A	GO B
1408	2932	CRY2	GSK3B	12953	56637	Cry2	Gsk3b	0	1	0	0	1	1	1	0	1	man	0.0425479	0.0032	9.2	3.5	0.0327913	6.3	circadian rhythm	anatomical structure formation
406	2034	ARNTL	EPAS1	11865	13819	Arntl	Epas1	0	0	1	1	0	1	0	0	0	ext	0	0.239529	22.4	7.4	0	22.5	circadian rhythm	anatomical structure formation
2932	8553	GSK3B	BHLHE40	56637	20893	Gsk3b	Bhlhb2	1	0	1	0	1	1	1	1	0	y2h	0.0032	0.000859098	3.5	12.4	0.057205	10.3	anatomical structure formation	circadian rhythm
406	9575	ARNTL	CLOCK	11865	12753	Arntl	Clock	1	0	1	1	1	1	1	0	0	unihi.y2h	0	0	22.4	23	0	22.6	positive regulation of transcription from RNA polymerase II promoter	positive regulation of transcription from RNA polymerase II promoter
406	3091	ARNTL	HIF1A	11865	15251	Arntl	Hif1a	0	0	1	1	0	1	0	0	0	ext	0	0.00680597	22.4	9.6	0	22.4	circadian rhythm	anatomical structure formation
406	3320	ARNTL	HSP90AA1	11865	15519	Arntl	Hsp90aa1	0	0	1	1	0	1	0	0	0	ext	0	0	22.4	19.2	0	21.7	circadian rhythm	anatomical structure formation
5518	8553	PPP2R1A	BHLHE40	51792	20893	Ppp2r1a	Bhlhb2	1	0	1	0	1	1	1	1	0	y2h	0.000944137	0.000859098	3.7	12.4	0.029	10.6	anatomical structure formation	circadian rhythm
406	4862	ARNTL	NPAS2	11865	18143	Arntl	Npas2	1	0	1	1	1	1	1	0	0	unihi.y2h	0	0	22.4	0.9	0	23.5	positive regulation of transcription from RNA polymerase II promoter	positive regulation of transcription from RNA polymerase II promoter
406	1460	ARNTL	CSNK2B	11865	13001	Arntl	Csnk2b	1	1	1	0	1	1	1	0	1	man.y2h	0	0.4747	22.4	5.9	0	22.5	circadian rhythm	cell surface receptor linked signal transduction
1407	1460	CRY1	CSNK2B	12952	13001	Cry1	Csnk2b	1	0	1	0	1	1	1	0	1	y2h	0	0.4747	19.8	5.9	0	19.9	circadian rhythm	cell surface receptor linked signal transduction
2932	8864	GSK3B	PER2	56637	18627	Gsk3b	Per2	0	1	0	0	1	1	1	1	0	man	0.0032	0	3.5	20.1	0	13.7	anatomical structure formation	circadian rhythm
406	1407	ARNTL	CRY1	11865	12952	Arntl	Cry1	1	0	1	1	1	1	1	0	0	unihi.y2h	0	0	22.4	19.8	0	21.2	positive regulation of transcription from RNA polymerase II promoter	DNA repair
8864	8945	PER2	BTRC	18627	12234	Per2	Btrc	0	1	0	0	1	1	1	0	1	man	0	0.0144088	20.1	5.2	0	13.8	circadian rhythm	cell surface receptor linked signal transduction
1408	2932	CRY2	GSK3B	12953	56637	Cry2	Gsk3b	0	1	0	0	1	1	1	0	1	man	0.0425479	0.0032	9.2	3.5	0.0327913	6.3	circadian rhythm	cell surface receptor linked signal transduction
2932	9572	GSK3B	NR1D1	56637	217166	Gsk3b	Nr1d1	0	1	0	0	1	1	1	1	0	man	0.0032	0	3.5	6.8	0	6.3	anatomical structure formation	circadian rhythm
406	1408	ARNTL	CRY2	11865	12953	Arntl	Cry2	1	0	1	0	1	1	1	0	0	y2h	0	0.0425479	22.4	9.2	0	22.5	positive regulation of transcription from RNA polymerase II promoter	DNA repair
406	1457	ARNTL	CSNK2A1	11865	12995	Arntl	Csnk2a1	0	1	0	0	1	1	1	0	1	man	0	0.000167929	22.4	6.5	0	22.8	circadian rhythm	cell surface receptor linked signal transduction
406	1460	ARNTL	CSNK2B	11865	13001	Arntl	Csnk2b	1	1	1	0	1	1	1	0	1	man.y2h	0	0.4747	22.4	5.9	0	22.5	positive regulation of transcription from RNA polymerase II promoter	cell surface receptor linked signal transduction
8864	23291	PER2	FBXW11	18627	103583	Per2	Fbxw11	0	1	0	0	1	1	1	0	1	man	0	0.00217924	20.1	4.6	0	13.9	circadian rhythm	cell surface receptor linked signal transduction
1407	1453	CRY1	CSNK1D	12952	104318	Cry1	Csnk1d	0	1	0	0	1	1	1	0	1	man	0	0.029129	19.8	2.8	0	20.2	circadian rhythm	cell surface receptor linked signal transduction
196	406	AHR	ARNTL	11622	11865	Ahr	Arntl	0	0	1	1	0	0	1	0	0	ext	0.0121611	0	4.8	22.4	0	22.8	anatomical structure formation	circadian rhythm
406	8553	ARNTL	BHLHE40	11865	20893	Arntl	Bhlhb2	1	0	1	1	1	1	1	0	0	unihi.y2h	0	0.000859098	22.4	12.4	0	21.5	positive regulation of transcription from RNA polymerase II promoter	response to external stimulus
1408	1453	CRY2	CSNK1D	12953	104318	Cry2	Csnk1d	0	1	0	0	1	1	1	0	1	man	0.0425479	0.029129	9.2	2.8	0.0819775	7.1	circadian rhythm	cell surface receptor linked signal transduction
406	3091	ARNTL	HIF1A	11865	15251	Arntl	Hif1a	0	0	1	1	0	1	0	0	0	ext	0	0.00680597	22.4	9.6	0	22.4	circadian rhythm	cell surface receptor linked signal transduction
406	1454	ARNTL	CSNK1E	11865	27373	Arntl	Csnk1e	1	0	1	1	1	1	1	0	1	unihi.y2h	0	0.0768418	22.4	16.6	0	22.1	positive regulation of transcription from RNA polymerase II promoter	DNA repair
406	1454	ARNTL	CSNK1E	11865	27373	Arntl	Csnk1e	1	0	1	1	1	1	1	0	1	unihi.y2h	0	0.0768418	22.4	16.6	0	22.1	positive regulation of transcription from RNA polymerase II promoter	protein amino acid phosphorylation
8553	79176	BHLHE40	FBXL15	20893	68431	Bhlhb2	Fbxl15	1	0	1	0	1	1	1	0	1	y2h	0.000859098	0.0111513	12.4	18.4	0.00113402	13.8	circadian rhythm	cellular protein catabolic process
8864	8945	PER2	BTRC	18627	12234	Per2	Btrc	0	1	0	0	1	1	1	0	1	man	0	0.0144088	20.1	5.2	0	13.8	circadian rhythm	cellular protein catabolic process
1387	4862	CREBBP	NPAS2	12914	18143	Crebbp	Npas2	0	0	1	1	0	0	1	0	0	ext	0.000545079	0	3.6	0.9	0	1.8	anatomical structure formation	circadian rhythm
1407	9575	CRY1	CLOCK	12952	12753	Cry1	Clock	1	0	1	0	1	1	1	0	0	y2h	0	0	19.8	23	0	20.7	DNA repair	positive regulation of transcription from RNA polymerase II promoter
1407	26224	CRY1	FBXL3	12952	50789	Cry1	Fbxl3	0	1	0	0	1	1	1	0	1	man	0	0.00326556	19.8	4.7	0	20.1	circadian rhythm	cellular protein catabolic process
1408	26224	CRY2	FBXL3	12953	50789	Cry2	Fbxl3	0	1	0	0	1	1	1	0	1	man	0.0425479	0.00326556	9.2	4.7	0.0099	7.3	circadian rhythm	cellular protein catabolic process
2034	56938	EPAS1	ARNTL2	13819	272322	Epas1	Arntl2	0	0	1	1	0	0	1	0	0	ext	0.239529	0.37551	7.4	16.5	0.398957	9.4	anatomical structure formation	circadian rhythm
1407	4862	CRY1	NPAS2	12952	18143	Cry1	Npas2	1	0	1	0	1	1	1	0	0	y2h	0	0	19.8	0.9	0	22.1	DNA repair	positive regulation of transcription from RNA polymerase II promoter
8864	23291	PER2	FBXW11	18627	103583	Per2	Fbxw11	0	1	0	0	1	1	1	0	1	man	0	0.00217924	20.1	4.6	0	13.9	circadian rhythm	cellular protein catabolic process
1407	79365	CRY1	BHLHE41	12952	79362	Cry1	Bhlhb3	1	0	1	0	1	1	1	0	0	y2h	0	0.0861876	19.8	15.2	0	19.6	DNA repair	organ morphogenesis
1408	2146	CRY2	EZH2	12953	14056	Cry2	Ezh2	1	0	1	0	1	1	1	0	0	y2h	0.0425479	0.00842676	9.2	5.7	0.000846154	7.6	circadian rhythm	chromatin modification
406	2146	ARNTL	EZH2	11865	14056	Arntl	Ezh2	0	1	0	0	1	1	1	0	0	man	0	0.00842676	22.4	5.7	0	22.8	circadian rhythm	chromatin modification
3091	5187	HIF1A	PER1	15251	18626	Hif1a	Per1	0	0	1	1	0	0	1	0	0	ext	0.00680597	0	9.6	17.7	0	11.4	anatomical structure formation	circadian rhythm
1407	5187	CRY1	PER1	12952	18626	Cry1	Per1	1	0	1	1	1	1	1	0	0	unihi.y2h	0	0	19.8	17.7	0	18.6	DNA repair	response to external stimulus
406	2033	ARNTL	EP300	11865	328572	Arntl	Ep300	0	0	1	1	0	1	0	0	0	ext	0	0.0181655	22.4	5.6	0	22.9	circadian rhythm	chromatin modification
1407	1460	CRY1	CSNK2B	12952	13001	Cry1	Csnk2b	1	0	1	0	1	1	1	0	1	y2h	0	0.4747	19.8	5.9	0	19.9	DNA repair	cell surface receptor linked signal transduction
406	8850	ARNTL	KAT2B	11865	18519	Arntl	Kat2b	0	0	1	1	0	1	0	0	0	ext	0	0	22.4	8.4	0	22.6	circadian rhythm	chromatin modification
4862	8850	NPAS2	KAT2B	18143	18519	Npas2	Kat2b	0	0	1	1	0	1	0	0	0	ext	0	0	0.9	8.4	0	1.6	circadian rhythm	chromatin modification
1407	1454	CRY1	CSNK1E	12952	27373	Cry1	Csnk1e	1	1	1	1	1	1	1	0	1	man.y2h	0	0.0768418	19.8	16.6	0	19.6	DNA repair	DNA repair
1407	1454	CRY1	CSNK1E	12952	27373	Cry1	Csnk1e	1	1	1	1	1	1	1	0	1	man.y2h	0	0.0768418	19.8	16.6	0	19.6	DNA repair	protein amino acid phosphorylation
9572	9611	NR1D1	NCOR1	217166	20185	Nr1d1	Ncor1	0	0	1	1	0	1	0	0	0	ext	0	0.000292467	6.8	3.1	0	6.4	circadian rhythm	chromatin modification
1408	2146	CRY2	EZH2	12953	14056	Cry2	Ezh2	1	0	1	0	1	1	1	0	0	y2h	0.0425479	0.00842676	9.2	5.7	0.000846154	7.6	circadian rhythm	chromatin organization
3320	4862	HSP90AA1	NPAS2	15519	18143	Hsp90aa1	Npas2	0	0	1	1	0	0	1	0	0	ext	0	0	19.2	0.9	0	23.5	anatomical structure formation	circadian rhythm
1407	8553	CRY1	BHLHE40	12952	20893	Cry1	Bhlhb2	1	0	1	0	1	1	1	0	0	y2h	0	0.000859098	19.8	12.4	0	18.6	DNA repair	response to external stimulus
406	2146	ARNTL	EZH2	11865	14056	Arntl	Ezh2	0	1	0	0	1	1	1	0	0	man	0	0.00842676	22.4	5.7	0	22.8	circadian rhythm	chromatin organization
1453	8864	CSNK1D	PER2	104318	18627	Csnk1d	Per2	1	0	1	1	1	1	1	1	0	unihi.y2h	0.029129	0	2.8	20.1	0	14	cell surface receptor linked signal transduction	circadian rhythm
406	2033	ARNTL	EP300	11865	328572	Arntl	Ep300	0	0	1	1	0	1	0	0	0	ext	0	0.0181655	22.4	5.6	0	22.9	circadian rhythm	chromatin organization
406	8850	ARNTL	KAT2B	11865	18519	Arntl	Kat2b	0	0	1	1	0	1	0	0	0	ext	0	0	22.4	8.4	0	22.6	circadian rhythm	chromatin organization
1457	8553	CSNK2A1	BHLHE40	12995	20893	Csnk2a1	Bhlhb2	1	0	1	0	1	1	1	1	0	y2h	0.000167929	0.000859098	6.5	12.4	0.000108772	10.8	cell surface receptor linked signal transduction	circadian rhythm
1408	9575	CRY2	CLOCK	12953	12753	Cry2	Clock	1	0	1	0	1	1	1	0	0	y2h	0.0425479	0	9.2	23	0	0	DNA repair	positive regulation of transcription from RNA polymerase II promoter
4862	8850	NPAS2	KAT2B	18143	18519	Npas2	Kat2b	0	0	1	1	0	1	0	0	0	ext	0	0	0.9	8.4	0	1.6	circadian rhythm	chromatin organization
9572	9611	NR1D1	NCOR1	217166	20185	Nr1d1	Ncor1	0	0	1	1	0	1	0	0	0	ext	0	0.000292467	6.8	3.1	0	6.4	circadian rhythm	chromatin organization
1459	8553	CSNK2A2	BHLHE40	13000	20893	Csnk2a2	Bhlhb2	1	0	1	0	1	1	1	1	0	y2h	1.52749e-05	0.000859098	5.3	12.4	0.00189552	10.5	cell surface receptor linked signal transduction	circadian rhythm
1408	4862	CRY2	NPAS2	12953	18143	Cry2	Npas2	1	0	1	0	1	1	1	0	0	y2h	0.0425479	0	9.2	0.9	0	1.6	DNA repair	positive regulation of transcription from RNA polymerase II promoter
1460	9575	CSNK2B	CLOCK	13001	12753	Csnk2b	Clock	1	0	1	0	1	1	1	1	0	y2h	0.4747	0	5.9	23	0	23.5	cell surface receptor linked signal transduction	circadian rhythm
1408	79365	CRY2	BHLHE41	12953	79362	Cry2	Bhlhb3	1	0	1	0	1	1	1	0	0	y2h	0.0425479	0.0861876	9.2	15.2	0.00558891	10.9	DNA repair	organ morphogenesis
1460	4862	CSNK2B	NPAS2	13001	18143	Csnk2b	Npas2	1	0	1	0	1	1	1	1	0	y2h	0.4747	0	5.9	0.9	0	1.1	cell surface receptor linked signal transduction	circadian rhythm
1460	5187	CSNK2B	PER1	13001	18626	Csnk2b	Per1	1	0	1	0	1	1	1	1	0	y2h	0.4747	0	5.9	17.7	4.8e-05	11.2	cell surface receptor linked signal transduction	circadian rhythm
1408	2146	CRY2	EZH2	12953	14056	Cry2	Ezh2	1	0	1	0	1	1	1	0	0	y2h	0.0425479	0.00842676	9.2	5.7	0.000846154	7.6	DNA repair	chromatin modification
1408	2146	CRY2	EZH2	12953	14056	Cry2	Ezh2	1	0	1	0	1	1	1	0	0	y2h	0.0425479	0.00842676	9.2	5.7	0.000846154	7.6	DNA repair	chromatin organization
1460	8864	CSNK2B	PER2	13001	18627	Csnk2b	Per2	1	1	1	0	1	1	1	1	0	man.y2h	0.4747	0	5.9	20.1	0	13.9	cell surface receptor linked signal transduction	circadian rhythm
1460	8553	CSNK2B	BHLHE40	13001	20893	Csnk2b	Bhlhb2	1	0	1	0	1	1	1	1	0	y2h	0.4747	0.000859098	5.9	12.4	0.00534259	11.8	cell surface receptor linked signal transduction	circadian rhythm
2932	8553	GSK3B	BHLHE40	56637	20893	Gsk3b	Bhlhb2	1	0	1	0	1	1	1	1	0	y2h	0.0032	0.000859098	3.5	12.4	0.057205	10.3	cell surface receptor linked signal transduction	circadian rhythm
1408	5187	CRY2	PER1	12953	18626	Cry2	Per1	1	0	1	1	1	1	1	0	0	unihi.y2h	0.0425479	0	9.2	17.7	2.73973e-05	10.9	DNA repair	response to external stimulus
5515	8553	PPP2CA	BHLHE40	19052	20893	Ppp2ca	Bhlhb2	1	0	1	0	1	1	1	1	0	y2h	0.023019	0.000859098	9.1	12.4	3.84615e-05	11.9	cell surface receptor linked signal transduction	circadian rhythm
5518	8553	PPP2R1A	BHLHE40	51792	20893	Ppp2r1a	Bhlhb2	1	0	1	0	1	1	1	1	0	y2h	0.000944137	0.000859098	3.7	12.4	0.029	10.6	cell surface receptor linked signal transduction	circadian rhythm
2932	8864	GSK3B	PER2	56637	18627	Gsk3b	Per2	0	1	0	0	1	1	1	1	0	man	0.0032	0	3.5	20.1	0	13.7	cell surface receptor linked signal transduction	circadian rhythm
1408	8553	CRY2	BHLHE40	12953	20893	Cry2	Bhlhb2	1	0	1	0	1	1	1	0	0	y2h	0.0425479	0.000859098	9.2	12.4	0.000711864	11.3	DNA repair	response to external stimulus
1457	8864	CSNK2A1	PER2	12995	18627	Csnk2a1	Per2	0	1	0	0	1	1	1	1	0	man	0.000167929	0	6.5	20.1	0	13.5	cell surface receptor linked signal transduction	circadian rhythm
5578	8864	PRKCA	PER2	18750	18627	Prkca	Per2	0	1	0	0	1	1	1	1	0	man	0.00678513	0	7.5	20.1	0	13.6	cell surface receptor linked signal transduction	circadian rhythm
2932	9572	GSK3B	NR1D1	56637	217166	Gsk3b	Nr1d1	0	1	0	0	1	1	1	1	0	man	0.0032	0	3.5	6.8	0	6.3	cell surface receptor linked signal transduction	circadian rhythm
1453	5187	CSNK1D	PER1	104318	18626	Csnk1d	Per1	0	0	1	1	1	1	1	1	0	unihi	0.029129	0	2.8	17.7	0.000747899	10.8	cell surface receptor linked signal transduction	circadian rhythm
3091	5187	HIF1A	PER1	15251	18626	Hif1a	Per1	0	0	1	1	0	0	1	0	0	ext	0.00680597	0	9.6	17.7	0	11.4	cell surface receptor linked signal transduction	circadian rhythm
6774	8553	STAT3	BHLHE40	20848	20893	Stat3	Bhlhb2	0	0	1	1	0	0	1	0	0	ext	0.00255469	0.000859098	3.2	12.4	0.177285	9.1	cell surface receptor linked signal transduction	circadian rhythm
1454	9575	CSNK1E	CLOCK	27373	12753	Csnk1e	Clock	1	0	1	0	1	1	1	1	0	y2h	0.0768418	0	16.6	23	0	22.4	DNA repair	positive regulation of transcription from RNA polymerase II promoter
7329	8553	UBE2I	BHLHE40	22196	20893	Ube2i	Bhlhb2	0	0	1	1	0	0	1	0	0	ext	0.000613374	0.000859098	5.1	12.4	0.00408706	10.8	cellular protein catabolic process	circadian rhythm
1454	9575	CSNK1E	CLOCK	27373	12753	Csnk1e	Clock	1	0	1	0	1	1	1	1	0	y2h	0.0768418	0	16.6	23	0	22.4	protein amino acid phosphorylation	positive regulation of transcription from RNA polymerase II promoter
1454	79365	CSNK1E	BHLHE41	27373	79362	Csnk1e	Bhlhb3	1	0	1	0	1	1	1	1	0	y2h	0.0768418	0.0861876	16.6	15.2	0.00941611	15.9	DNA repair	organ morphogenesis
1454	79365	CSNK1E	BHLHE41	27373	79362	Csnk1e	Bhlhb3	1	0	1	0	1	1	1	1	0	y2h	0.0768418	0.0861876	16.6	15.2	0.00941611	15.9	protein amino acid phosphorylation	organ morphogenesis
2146	8553	EZH2	BHLHE40	14056	20893	Ezh2	Bhlhb2	1	0	1	0	1	1	1	0	0	y2h	0.00842676	0.000859098	5.7	12.4	0.000875	10.6	chromatin modification	circadian rhythm
1454	5187	CSNK1E	PER1	27373	18626	Csnk1e	Per1	1	0	1	1	1	1	1	1	0	unihi.y2h	0.0768418	0	16.6	17.7	0	12.4	DNA repair	response to external stimulus
2146	9575	EZH2	CLOCK	14056	12753	Ezh2	Clock	0	1	0	0	1	1	1	0	0	man	0.00842676	0	5.7	23	0	0.4	chromatin modification	circadian rhythm
1454	5187	CSNK1E	PER1	27373	18626	Csnk1e	Per1	1	0	1	1	1	1	1	1	0	unihi.y2h	0.0768418	0	16.6	17.7	0	12.4	protein amino acid phosphorylation	response to external stimulus
1454	1460	CSNK1E	CSNK2B	27373	13001	Csnk1e	Csnk2b	1	0	1	0	1	1	1	1	1	y2h	0.0768418	0.4747	16.6	5.9	0.798003	14.6	DNA repair	cell surface receptor linked signal transduction
1454	1460	CSNK1E	CSNK2B	27373	13001	Csnk1e	Csnk2b	1	0	1	0	1	1	1	1	1	y2h	0.0768418	0.4747	16.6	5.9	0.798003	14.6	protein amino acid phosphorylation	cell surface receptor linked signal transduction
1387	4862	CREBBP	NPAS2	12914	18143	Crebbp	Npas2	0	0	1	1	0	0	1	0	0	ext	0.000545079	0	3.6	0.9	0	1.8	chromatin modification	circadian rhythm
2033	9575	EP300	CLOCK	328572	12753	Ep300	Clock	0	0	1	1	0	0	1	0	0	ext	0.0181655	0	5.6	23	0	0.6	chromatin modification	circadian rhythm
2033	4862	EP300	NPAS2	328572	18143	Ep300	Npas2	0	0	1	1	0	0	1	0	0	ext	0.0181655	0	5.6	0.9	0	1.6	chromatin modification	circadian rhythm
1454	8553	CSNK1E	BHLHE40	27373	20893	Csnk1e	Bhlhb2	1	0	1	0	1	1	1	1	0	y2h	0.0768418	0.000859098	16.6	12.4	9.55882e-05	13	DNA repair	response to external stimulus
8850	9575	KAT2B	CLOCK	18519	12753	Kat2b	Clock	0	0	1	1	0	0	1	0	0	ext	0	0	8.4	23	0	0.3	chromatin modification	circadian rhythm
1454	8553	CSNK1E	BHLHE40	27373	20893	Csnk1e	Bhlhb2	1	0	1	0	1	1	1	1	0	y2h	0.0768418	0.000859098	16.6	12.4	9.55882e-05	13	protein amino acid phosphorylation	response to external stimulus
1454	1454	CSNK1E	CSNK1E	27373	27373	Csnk1e	Csnk1e	1	0	1	1	1	1	1	1	1	unihi.y2h	0.0768418	0.0768418	16.6	16.6	0.0301557	16.6	DNA repair	DNA repair
1454	1454	CSNK1E	CSNK1E	27373	27373	Csnk1e	Csnk1e	1	0	1	1	1	1	1	1	1	unihi.y2h	0.0768418	0.0768418	16.6	16.6	0.0301557	16.6	DNA repair	protein amino acid phosphorylation
1454	1454	CSNK1E	CSNK1E	27373	27373	Csnk1e	Csnk1e	1	0	1	1	1	1	1	1	1	unihi.y2h	0.0768418	0.0768418	16.6	16.6	0.0301557	16.6	protein amino acid phosphorylation	DNA repair
1454	1454	CSNK1E	CSNK1E	27373	27373	Csnk1e	Csnk1e	1	0	1	1	1	1	1	1	1	unihi.y2h	0.0768418	0.0768418	16.6	16.6	0.0301557	16.6	protein amino acid phosphorylation	protein amino acid phosphorylation
1454	23291	CSNK1E	FBXW11	27373	103583	Csnk1e	Fbxw11	1	0	1	0	1	1	1	1	1	y2h	0.0768418	0.00217924	16.6	4.6	0.992639	17.9	DNA repair	modification-dependent protein catabolic process
1454	23291	CSNK1E	FBXW11	27373	103583	Csnk1e	Fbxw11	1	0	1	0	1	1	1	1	1	y2h	0.0768418	0.00217924	16.6	4.6	0.992639	17.9	DNA repair	modification-dependent macromolecule catabolic process
1454	23291	CSNK1E	FBXW11	27373	103583	Csnk1e	Fbxw11	1	0	1	0	1	1	1	1	1	y2h	0.0768418	0.00217924	16.6	4.6	0.992639	17.9	DNA repair	cellular protein catabolic process
1454	23291	CSNK1E	FBXW11	27373	103583	Csnk1e	Fbxw11	1	0	1	0	1	1	1	1	1	y2h	0.0768418	0.00217924	16.6	4.6	0.992639	17.9	DNA repair	proteolysis involved in cellular protein catabolic process
1454	23291	CSNK1E	FBXW11	27373	103583	Csnk1e	Fbxw11	1	0	1	0	1	1	1	1	1	y2h	0.0768418	0.00217924	16.6	4.6	0.992639	17.9	DNA repair	cell surface receptor linked signal transduction
1454	23291	CSNK1E	FBXW11	27373	103583	Csnk1e	Fbxw11	1	0	1	0	1	1	1	1	1	y2h	0.0768418	0.00217924	16.6	4.6	0.992639	17.9	protein amino acid phosphorylation	modification-dependent protein catabolic process
1454	23291	CSNK1E	FBXW11	27373	103583	Csnk1e	Fbxw11	1	0	1	0	1	1	1	1	1	y2h	0.0768418	0.00217924	16.6	4.6	0.992639	17.9	protein amino acid phosphorylation	modification-dependent macromolecule catabolic process
1454	23291	CSNK1E	FBXW11	27373	103583	Csnk1e	Fbxw11	1	0	1	0	1	1	1	1	1	y2h	0.0768418	0.00217924	16.6	4.6	0.992639	17.9	protein amino acid phosphorylation	cellular protein catabolic process
1454	23291	CSNK1E	FBXW11	27373	103583	Csnk1e	Fbxw11	1	0	1	0	1	1	1	1	1	y2h	0.0768418	0.00217924	16.6	4.6	0.992639	17.9	protein amino acid phosphorylation	proteolysis involved in cellular protein catabolic process
1454	23291	CSNK1E	FBXW11	27373	103583	Csnk1e	Fbxw11	1	0	1	0	1	1	1	1	1	y2h	0.0768418	0.00217924	16.6	4.6	0.992639	17.9	protein amino acid phosphorylation	cell surface receptor linked signal transduction
1454	6095	CSNK1E	RORA	27373	19883	Csnk1e	Rora	1	0	1	0	1	1	1	1	0	y2h	0.0768418	3.89273e-05	16.6	21.9	0.000136519	20.2	DNA repair	positive regulation of transcription from RNA polymerase II promoter
1454	6095	CSNK1E	RORA	27373	19883	Csnk1e	Rora	1	0	1	0	1	1	1	1	0	y2h	0.0768418	3.89273e-05	16.6	21.9	0.000136519	20.2	DNA repair	anatomical structure formation
1454	6095	CSNK1E	RORA	27373	19883	Csnk1e	Rora	1	0	1	0	1	1	1	1	0	y2h	0.0768418	3.89273e-05	16.6	21.9	0.000136519	20.2	protein amino acid phosphorylation	positive regulation of transcription from RNA polymerase II promoter
1454	6095	CSNK1E	RORA	27373	19883	Csnk1e	Rora	1	0	1	0	1	1	1	1	0	y2h	0.0768418	3.89273e-05	16.6	21.9	0.000136519	20.2	protein amino acid phosphorylation	anatomical structure formation
1457	79365	CSNK2A1	BHLHE41	12995	79362	Csnk2a1	Bhlhb3	1	0	1	0	1	1	1	1	0	y2h	0.000167929	0.0861876	6.5	15.2	0.0032506	8.6	protein amino acid phosphorylation	organ morphogenesis
1457	79365	CSNK2A1	BHLHE41	12995	79362	Csnk2a1	Bhlhb3	1	0	1	0	1	1	1	1	0	y2h	0.000167929	0.0861876	6.5	15.2	0.0032506	8.6	cell surface receptor linked signal transduction	organ morphogenesis
1457	1460	CSNK2A1	CSNK2B	12995	13001	Csnk2a1	Csnk2b	1	0	1	1	1	1	1	1	1	unihi.y2h	0.000167929	0.4747	6.5	5.9	0.000257962	6.3	protein amino acid phosphorylation	cell surface receptor linked signal transduction
1457	1460	CSNK2A1	CSNK2B	12995	13001	Csnk2a1	Csnk2b	1	0	1	1	1	1	1	1	1	unihi.y2h	0.000167929	0.4747	6.5	5.9	0.000257962	6.3	cell surface receptor linked signal transduction	cell surface receptor linked signal transduction
2146	8553	EZH2	BHLHE40	14056	20893	Ezh2	Bhlhb2	1	0	1	0	1	1	1	0	0	y2h	0.00842676	0.000859098	5.7	12.4	0.000875	10.6	chromatin organization	circadian rhythm
1457	8553	CSNK2A1	BHLHE40	12995	20893	Csnk2a1	Bhlhb2	1	0	1	0	1	1	1	1	0	y2h	0.000167929	0.000859098	6.5	12.4	0.000108772	10.8	protein amino acid phosphorylation	response to external stimulus
2146	9575	EZH2	CLOCK	14056	12753	Ezh2	Clock	0	1	0	0	1	1	1	0	0	man	0.00842676	0	5.7	23	0	0.4	chromatin organization	circadian rhythm
1457	8553	CSNK2A1	BHLHE40	12995	20893	Csnk2a1	Bhlhb2	1	0	1	0	1	1	1	1	0	y2h	0.000167929	0.000859098	6.5	12.4	0.000108772	10.8	cell surface receptor linked signal transduction	response to external stimulus
1459	79365	CSNK2A2	BHLHE41	13000	79362	Csnk2a2	Bhlhb3	1	0	1	0	1	1	1	1	0	y2h	1.52749e-05	0.0861876	5.3	15.2	0.0145991	6.9	protein amino acid phosphorylation	organ morphogenesis
1459	79365	CSNK2A2	BHLHE41	13000	79362	Csnk2a2	Bhlhb3	1	0	1	0	1	1	1	1	0	y2h	1.52749e-05	0.0861876	5.3	15.2	0.0145991	6.9	cell surface receptor linked signal transduction	organ morphogenesis
1459	1460	CSNK2A2	CSNK2B	13000	13001	Csnk2a2	Csnk2b	1	0	1	1	1	1	1	1	1	unihi.y2h	1.52749e-05	0.4747	5.3	5.9	0.0014173	5.5	protein amino acid phosphorylation	cell surface receptor linked signal transduction
1459	1460	CSNK2A2	CSNK2B	13000	13001	Csnk2a2	Csnk2b	1	0	1	1	1	1	1	1	1	unihi.y2h	1.52749e-05	0.4747	5.3	5.9	0.0014173	5.5	cell surface receptor linked signal transduction	cell surface receptor linked signal transduction
1387	4862	CREBBP	NPAS2	12914	18143	Crebbp	Npas2	0	0	1	1	0	0	1	0	0	ext	0.000545079	0	3.6	0.9	0	1.8	chromatin organization	circadian rhythm
1459	8553	CSNK2A2	BHLHE40	13000	20893	Csnk2a2	Bhlhb2	1	0	1	0	1	1	1	1	0	y2h	1.52749e-05	0.000859098	5.3	12.4	0.00189552	10.5	protein amino acid phosphorylation	response to external stimulus
2033	9575	EP300	CLOCK	328572	12753	Ep300	Clock	0	0	1	1	0	0	1	0	0	ext	0.0181655	0	5.6	23	0	0.6	chromatin organization	circadian rhythm
1459	8553	CSNK2A2	BHLHE40	13000	20893	Csnk2a2	Bhlhb2	1	0	1	0	1	1	1	1	0	y2h	1.52749e-05	0.000859098	5.3	12.4	0.00189552	10.5	cell surface receptor linked signal transduction	response to external stimulus
2033	4862	EP300	NPAS2	328572	18143	Ep300	Npas2	0	0	1	1	0	0	1	0	0	ext	0.0181655	0	5.6	0.9	0	1.6	chromatin organization	circadian rhythm
1460	9575	CSNK2B	CLOCK	13001	12753	Csnk2b	Clock	1	0	1	0	1	1	1	1	0	y2h	0.4747	0	5.9	23	0	23.5	cell surface receptor linked signal transduction	positive regulation of transcription from RNA polymerase II promoter
8850	9575	KAT2B	CLOCK	18519	12753	Kat2b	Clock	0	0	1	1	0	0	1	0	0	ext	0	0	8.4	23	0	0.3	chromatin organization	circadian rhythm
1460	4862	CSNK2B	NPAS2	13001	18143	Csnk2b	Npas2	1	0	1	0	1	1	1	1	0	y2h	0.4747	0	5.9	0.9	0	1.1	cell surface receptor linked signal transduction	positive regulation of transcription from RNA polymerase II promoter
1460	2932	CSNK2B	GSK3B	13001	56637	Csnk2b	Gsk3b	1	0	1	0	1	1	1	1	1	y2h	0.4747	0.0032	5.9	3.5	0.0135411	4	cell surface receptor linked signal transduction	organ morphogenesis
1460	2932	CSNK2B	GSK3B	13001	56637	Csnk2b	Gsk3b	1	0	1	0	1	1	1	1	1	y2h	0.4747	0.0032	5.9	3.5	0.0135411	4	cell surface receptor linked signal transduction	protein amino acid phosphorylation
1460	2932	CSNK2B	GSK3B	13001	56637	Csnk2b	Gsk3b	1	0	1	0	1	1	1	1	1	y2h	0.4747	0.0032	5.9	3.5	0.0135411	4	cell surface receptor linked signal transduction	intracellular signaling cascade
1460	2932	CSNK2B	GSK3B	13001	56637	Csnk2b	Gsk3b	1	0	1	0	1	1	1	1	1	y2h	0.4747	0.0032	5.9	3.5	0.0135411	4	cell surface receptor linked signal transduction	negative regulation of developmental process
1460	2932	CSNK2B	GSK3B	13001	56637	Csnk2b	Gsk3b	1	0	1	0	1	1	1	1	1	y2h	0.4747	0.0032	5.9	3.5	0.0135411	4	cell surface receptor linked signal transduction	cell surface receptor linked signal transduction
1460	2932	CSNK2B	GSK3B	13001	56637	Csnk2b	Gsk3b	1	0	1	0	1	1	1	1	1	y2h	0.4747	0.0032	5.9	3.5	0.0135411	4	cell surface receptor linked signal transduction	anatomical structure formation
1460	79365	CSNK2B	BHLHE41	13001	79362	Csnk2b	Bhlhb3	1	0	1	0	1	1	1	1	0	y2h	0.4747	0.0861876	5.9	15.2	0.487013	12.7	cell surface receptor linked signal transduction	organ morphogenesis
1460	5518	CSNK2B	PPP2R1A	13001	51792	Csnk2b	Ppp2r1a	1	0	1	0	1	1	1	1	1	y2h	0.4747	0.000944137	5.9	3.7	0.0163782	4.3	cell surface receptor linked signal transduction	response to organic substance
1460	5518	CSNK2B	PPP2R1A	13001	51792	Csnk2b	Ppp2r1a	1	0	1	0	1	1	1	1	1	y2h	0.4747	0.000944137	5.9	3.7	0.0163782	4.3	cell surface receptor linked signal transduction	protein amino acid phosphorylation
1460	5518	CSNK2B	PPP2R1A	13001	51792	Csnk2b	Ppp2r1a	1	0	1	0	1	1	1	1	1	y2h	0.4747	0.000944137	5.9	3.7	0.0163782	4.3	cell surface receptor linked signal transduction	intracellular signaling cascade
1460	5518	CSNK2B	PPP2R1A	13001	51792	Csnk2b	Ppp2r1a	1	0	1	0	1	1	1	1	1	y2h	0.4747	0.000944137	5.9	3.7	0.0163782	4.3	cell surface receptor linked signal transduction	cell surface receptor linked signal transduction
1460	5518	CSNK2B	PPP2R1A	13001	51792	Csnk2b	Ppp2r1a	1	0	1	0	1	1	1	1	1	y2h	0.4747	0.000944137	5.9	3.7	0.0163782	4.3	cell surface receptor linked signal transduction	anatomical structure formation
1460	2146	CSNK2B	EZH2	13001	14056	Csnk2b	Ezh2	1	0	1	0	1	1	1	1	0	y2h	0.4747	0.00842676	5.9	5.7	0.00126598	5.8	cell surface receptor linked signal transduction	chromatin modification
1460	2146	CSNK2B	EZH2	13001	14056	Csnk2b	Ezh2	1	0	1	0	1	1	1	1	0	y2h	0.4747	0.00842676	5.9	5.7	0.00126598	5.8	cell surface receptor linked signal transduction	chromatin organization
406	9575	ARNTL	CLOCK	11865	12753	Arntl	Clock	1	0	1	1	1	1	1	0	0	unihi.y2h	0	0	22.4	23	0	22.6	circadian rhythm	circadian rhythm
1460	5187	CSNK2B	PER1	13001	18626	Csnk2b	Per1	1	0	1	0	1	1	1	1	0	y2h	0.4747	0	5.9	17.7	4.8e-05	11.2	cell surface receptor linked signal transduction	response to external stimulus
1460	79176	CSNK2B	FBXL15	13001	68431	Csnk2b	Fbxl15	1	0	1	0	1	1	1	1	1	y2h	0.4747	0.0111513	5.9	18.4	0.438502	18.6	cell surface receptor linked signal transduction	modification-dependent protein catabolic process
1460	79176	CSNK2B	FBXL15	13001	68431	Csnk2b	Fbxl15	1	0	1	0	1	1	1	1	1	y2h	0.4747	0.0111513	5.9	18.4	0.438502	18.6	cell surface receptor linked signal transduction	modification-dependent macromolecule catabolic process
1460	79176	CSNK2B	FBXL15	13001	68431	Csnk2b	Fbxl15	1	0	1	0	1	1	1	1	1	y2h	0.4747	0.0111513	5.9	18.4	0.438502	18.6	cell surface receptor linked signal transduction	cellular protein catabolic process
1460	79176	CSNK2B	FBXL15	13001	68431	Csnk2b	Fbxl15	1	0	1	0	1	1	1	1	1	y2h	0.4747	0.0111513	5.9	18.4	0.438502	18.6	cell surface receptor linked signal transduction	proteolysis involved in cellular protein catabolic process
406	4862	ARNTL	NPAS2	11865	18143	Arntl	Npas2	1	0	1	1	1	1	1	0	0	unihi.y2h	0	0	22.4	0.9	0	23.5	circadian rhythm	circadian rhythm
406	1407	ARNTL	CRY1	11865	12952	Arntl	Cry1	1	0	1	1	1	1	1	0	0	unihi.y2h	0	0	22.4	19.8	0	21.2	circadian rhythm	circadian rhythm
1460	8553	CSNK2B	BHLHE40	13001	20893	Csnk2b	Bhlhb2	1	0	1	0	1	1	1	1	0	y2h	0.4747	0.000859098	5.9	12.4	0.00534259	11.8	cell surface receptor linked signal transduction	response to external stimulus
1460	1460	CSNK2B	CSNK2B	13001	13001	Csnk2b	Csnk2b	1	0	1	1	1	1	1	1	1	unihi.y2h	0.4747	0.4747	5.9	5.9	0.374198	6.1	cell surface receptor linked signal transduction	cell surface receptor linked signal transduction
1460	6096	CSNK2B	RORB	13001	225998	Csnk2b	Rorb	1	0	1	0	1	1	1	1	0	y2h	0.4747	0.531295	5.9	22	0.55999	2.5	cell surface receptor linked signal transduction	organ morphogenesis
1460	5515	CSNK2B	PPP2CA	13001	19052	Csnk2b	Ppp2ca	1	0	1	0	1	1	1	1	1	y2h	0.4747	0.023019	5.9	9.1	0.04779	7.8	cell surface receptor linked signal transduction	response to organic substance
1460	5515	CSNK2B	PPP2CA	13001	19052	Csnk2b	Ppp2ca	1	0	1	0	1	1	1	1	1	y2h	0.4747	0.023019	5.9	9.1	0.04779	7.8	cell surface receptor linked signal transduction	protein amino acid phosphorylation
1460	5515	CSNK2B	PPP2CA	13001	19052	Csnk2b	Ppp2ca	1	0	1	0	1	1	1	1	1	y2h	0.4747	0.023019	5.9	9.1	0.04779	7.8	cell surface receptor linked signal transduction	intracellular signaling cascade
1460	5515	CSNK2B	PPP2CA	13001	19052	Csnk2b	Ppp2ca	1	0	1	0	1	1	1	1	1	y2h	0.4747	0.023019	5.9	9.1	0.04779	7.8	cell surface receptor linked signal transduction	tissue development
1460	5515	CSNK2B	PPP2CA	13001	19052	Csnk2b	Ppp2ca	1	0	1	0	1	1	1	1	1	y2h	0.4747	0.023019	5.9	9.1	0.04779	7.8	cell surface receptor linked signal transduction	cell surface receptor linked signal transduction
406	1408	ARNTL	CRY2	11865	12953	Arntl	Cry2	1	0	1	0	1	1	1	0	0	y2h	0	0.0425479	22.4	9.2	0	22.5	circadian rhythm	circadian rhythm
1628	9575	DBP	CLOCK	13170	12753	Dbp	Clock	1	0	1	0	1	1	1	0	0	y2h	0	0	10.1	23	0	9.9	regulation of cell proliferation	positive regulation of transcription from RNA polymerase II promoter
406	8553	ARNTL	BHLHE40	11865	20893	Arntl	Bhlhb2	1	0	1	1	1	1	1	0	0	unihi.y2h	0	0.000859098	22.4	12.4	0	21.5	circadian rhythm	circadian rhythm
2146	8553	EZH2	BHLHE40	14056	20893	Ezh2	Bhlhb2	1	0	1	0	1	1	1	0	0	y2h	0.00842676	0.000859098	5.7	12.4	0.000875	10.6	chromatin modification	response to external stimulus
1407	9575	CRY1	CLOCK	12952	12753	Cry1	Clock	1	0	1	0	1	1	1	0	0	y2h	0	0	19.8	23	0	20.7	circadian rhythm	circadian rhythm
2146	8553	EZH2	BHLHE40	14056	20893	Ezh2	Bhlhb2	1	0	1	0	1	1	1	0	0	y2h	0.00842676	0.000859098	5.7	12.4	0.000875	10.6	chromatin organization	response to external stimulus
2932	79365	GSK3B	BHLHE41	56637	79362	Gsk3b	Bhlhb3	1	0	1	0	1	1	1	1	0	y2h	0.0032	0.0861876	3.5	15.2	0.0660095	3.7	organ morphogenesis	organ morphogenesis
2932	79365	GSK3B	BHLHE41	56637	79362	Gsk3b	Bhlhb3	1	0	1	0	1	1	1	1	0	y2h	0.0032	0.0861876	3.5	15.2	0.0660095	3.7	protein amino acid phosphorylation	organ morphogenesis
2932	79365	GSK3B	BHLHE41	56637	79362	Gsk3b	Bhlhb3	1	0	1	0	1	1	1	1	0	y2h	0.0032	0.0861876	3.5	15.2	0.0660095	3.7	intracellular signaling cascade	organ morphogenesis
2932	79365	GSK3B	BHLHE41	56637	79362	Gsk3b	Bhlhb3	1	0	1	0	1	1	1	1	0	y2h	0.0032	0.0861876	3.5	15.2	0.0660095	3.7	negative regulation of developmental process	organ morphogenesis
2932	79365	GSK3B	BHLHE41	56637	79362	Gsk3b	Bhlhb3	1	0	1	0	1	1	1	1	0	y2h	0.0032	0.0861876	3.5	15.2	0.0660095	3.7	cell surface receptor linked signal transduction	organ morphogenesis
2932	79365	GSK3B	BHLHE41	56637	79362	Gsk3b	Bhlhb3	1	0	1	0	1	1	1	1	0	y2h	0.0032	0.0861876	3.5	15.2	0.0660095	3.7	anatomical structure formation	organ morphogenesis
1407	4862	CRY1	NPAS2	12952	18143	Cry1	Npas2	1	0	1	0	1	1	1	0	0	y2h	0	0	19.8	0.9	0	22.1	circadian rhythm	circadian rhythm
2932	8553	GSK3B	BHLHE40	56637	20893	Gsk3b	Bhlhb2	1	0	1	0	1	1	1	1	0	y2h	0.0032	0.000859098	3.5	12.4	0.057205	10.3	organ morphogenesis	response to external stimulus
1407	5187	CRY1	PER1	12952	18626	Cry1	Per1	1	0	1	1	1	1	1	0	0	unihi.y2h	0	0	19.8	17.7	0	18.6	circadian rhythm	circadian rhythm
2932	8553	GSK3B	BHLHE40	56637	20893	Gsk3b	Bhlhb2	1	0	1	0	1	1	1	1	0	y2h	0.0032	0.000859098	3.5	12.4	0.057205	10.3	protein amino acid phosphorylation	response to external stimulus
1407	8553	CRY1	BHLHE40	12952	20893	Cry1	Bhlhb2	1	0	1	0	1	1	1	0	0	y2h	0	0.000859098	19.8	12.4	0	18.6	circadian rhythm	circadian rhythm
2932	8553	GSK3B	BHLHE40	56637	20893	Gsk3b	Bhlhb2	1	0	1	0	1	1	1	1	0	y2h	0.0032	0.000859098	3.5	12.4	0.057205	10.3	intracellular signaling cascade	response to external stimulus
1407	8864	CRY1	PER2	12952	18627	Cry1	Per2	1	0	1	1	1	1	1	0	0	unihi.y2h	0	0	19.8	20.1	0	17.1	circadian rhythm	circadian rhythm
2932	8553	GSK3B	BHLHE40	56637	20893	Gsk3b	Bhlhb2	1	0	1	0	1	1	1	1	0	y2h	0.0032	0.000859098	3.5	12.4	0.057205	10.3	negative regulation of developmental process	response to external stimulus
1408	9575	CRY2	CLOCK	12953	12753	Cry2	Clock	1	0	1	0	1	1	1	0	0	y2h	0.0425479	0	9.2	23	0	0	circadian rhythm	circadian rhythm
2932	8553	GSK3B	BHLHE40	56637	20893	Gsk3b	Bhlhb2	1	0	1	0	1	1	1	1	0	y2h	0.0032	0.000859098	3.5	12.4	0.057205	10.3	cell surface receptor linked signal transduction	response to external stimulus
1408	4862	CRY2	NPAS2	12953	18143	Cry2	Npas2	1	0	1	0	1	1	1	0	0	y2h	0.0425479	0	9.2	0.9	0	1.6	circadian rhythm	circadian rhythm
2932	8553	GSK3B	BHLHE40	56637	20893	Gsk3b	Bhlhb2	1	0	1	0	1	1	1	1	0	y2h	0.0032	0.000859098	3.5	12.4	0.057205	10.3	anatomical structure formation	response to external stimulus
2932	23291	GSK3B	FBXW11	56637	103583	Gsk3b	Fbxw11	1	0	1	0	1	1	1	1	1	y2h	0.0032	0.00217924	3.5	4.6	0.000130584	3.8	organ morphogenesis	modification-dependent protein catabolic process
2932	23291	GSK3B	FBXW11	56637	103583	Gsk3b	Fbxw11	1	0	1	0	1	1	1	1	1	y2h	0.0032	0.00217924	3.5	4.6	0.000130584	3.8	organ morphogenesis	modification-dependent macromolecule catabolic process
2932	23291	GSK3B	FBXW11	56637	103583	Gsk3b	Fbxw11	1	0	1	0	1	1	1	1	1	y2h	0.0032	0.00217924	3.5	4.6	0.000130584	3.8	organ morphogenesis	cellular protein catabolic process
2932	23291	GSK3B	FBXW11	56637	103583	Gsk3b	Fbxw11	1	0	1	0	1	1	1	1	1	y2h	0.0032	0.00217924	3.5	4.6	0.000130584	3.8	organ morphogenesis	proteolysis involved in cellular protein catabolic process
2932	23291	GSK3B	FBXW11	56637	103583	Gsk3b	Fbxw11	1	0	1	0	1	1	1	1	1	y2h	0.0032	0.00217924	3.5	4.6	0.000130584	3.8	organ morphogenesis	cell surface receptor linked signal transduction
2932	23291	GSK3B	FBXW11	56637	103583	Gsk3b	Fbxw11	1	0	1	0	1	1	1	1	1	y2h	0.0032	0.00217924	3.5	4.6	0.000130584	3.8	protein amino acid phosphorylation	modification-dependent protein catabolic process
2932	23291	GSK3B	FBXW11	56637	103583	Gsk3b	Fbxw11	1	0	1	0	1	1	1	1	1	y2h	0.0032	0.00217924	3.5	4.6	0.000130584	3.8	protein amino acid phosphorylation	modification-dependent macromolecule catabolic process
2932	23291	GSK3B	FBXW11	56637	103583	Gsk3b	Fbxw11	1	0	1	0	1	1	1	1	1	y2h	0.0032	0.00217924	3.5	4.6	0.000130584	3.8	protein amino acid phosphorylation	cellular protein catabolic process
2932	23291	GSK3B	FBXW11	56637	103583	Gsk3b	Fbxw11	1	0	1	0	1	1	1	1	1	y2h	0.0032	0.00217924	3.5	4.6	0.000130584	3.8	protein amino acid phosphorylation	proteolysis involved in cellular protein catabolic process
2932	23291	GSK3B	FBXW11	56637	103583	Gsk3b	Fbxw11	1	0	1	0	1	1	1	1	1	y2h	0.0032	0.00217924	3.5	4.6	0.000130584	3.8	protein amino acid phosphorylation	cell surface receptor linked signal transduction
2932	23291	GSK3B	FBXW11	56637	103583	Gsk3b	Fbxw11	1	0	1	0	1	1	1	1	1	y2h	0.0032	0.00217924	3.5	4.6	0.000130584	3.8	intracellular signaling cascade	modification-dependent protein catabolic process
2932	23291	GSK3B	FBXW11	56637	103583	Gsk3b	Fbxw11	1	0	1	0	1	1	1	1	1	y2h	0.0032	0.00217924	3.5	4.6	0.000130584	3.8	intracellular signaling cascade	modification-dependent macromolecule catabolic process
2932	23291	GSK3B	FBXW11	56637	103583	Gsk3b	Fbxw11	1	0	1	0	1	1	1	1	1	y2h	0.0032	0.00217924	3.5	4.6	0.000130584	3.8	intracellular signaling cascade	cellular protein catabolic process
2932	23291	GSK3B	FBXW11	56637	103583	Gsk3b	Fbxw11	1	0	1	0	1	1	1	1	1	y2h	0.0032	0.00217924	3.5	4.6	0.000130584	3.8	intracellular signaling cascade	proteolysis involved in cellular protein catabolic process
2932	23291	GSK3B	FBXW11	56637	103583	Gsk3b	Fbxw11	1	0	1	0	1	1	1	1	1	y2h	0.0032	0.00217924	3.5	4.6	0.000130584	3.8	intracellular signaling cascade	cell surface receptor linked signal transduction
2932	23291	GSK3B	FBXW11	56637	103583	Gsk3b	Fbxw11	1	0	1	0	1	1	1	1	1	y2h	0.0032	0.00217924	3.5	4.6	0.000130584	3.8	negative regulation of developmental process	modification-dependent protein catabolic process
2932	23291	GSK3B	FBXW11	56637	103583	Gsk3b	Fbxw11	1	0	1	0	1	1	1	1	1	y2h	0.0032	0.00217924	3.5	4.6	0.000130584	3.8	negative regulation of developmental process	modification-dependent macromolecule catabolic process
2932	23291	GSK3B	FBXW11	56637	103583	Gsk3b	Fbxw11	1	0	1	0	1	1	1	1	1	y2h	0.0032	0.00217924	3.5	4.6	0.000130584	3.8	negative regulation of developmental process	cellular protein catabolic process
2932	23291	GSK3B	FBXW11	56637	103583	Gsk3b	Fbxw11	1	0	1	0	1	1	1	1	1	y2h	0.0032	0.00217924	3.5	4.6	0.000130584	3.8	negative regulation of developmental process	proteolysis involved in cellular protein catabolic process
2932	23291	GSK3B	FBXW11	56637	103583	Gsk3b	Fbxw11	1	0	1	0	1	1	1	1	1	y2h	0.0032	0.00217924	3.5	4.6	0.000130584	3.8	negative regulation of developmental process	cell surface receptor linked signal transduction
2932	23291	GSK3B	FBXW11	56637	103583	Gsk3b	Fbxw11	1	0	1	0	1	1	1	1	1	y2h	0.0032	0.00217924	3.5	4.6	0.000130584	3.8	cell surface receptor linked signal transduction	modification-dependent protein catabolic process
2932	23291	GSK3B	FBXW11	56637	103583	Gsk3b	Fbxw11	1	0	1	0	1	1	1	1	1	y2h	0.0032	0.00217924	3.5	4.6	0.000130584	3.8	cell surface receptor linked signal transduction	modification-dependent macromolecule catabolic process
2932	23291	GSK3B	FBXW11	56637	103583	Gsk3b	Fbxw11	1	0	1	0	1	1	1	1	1	y2h	0.0032	0.00217924	3.5	4.6	0.000130584	3.8	cell surface receptor linked signal transduction	cellular protein catabolic process
2932	23291	GSK3B	FBXW11	56637	103583	Gsk3b	Fbxw11	1	0	1	0	1	1	1	1	1	y2h	0.0032	0.00217924	3.5	4.6	0.000130584	3.8	cell surface receptor linked signal transduction	proteolysis involved in cellular protein catabolic process
2932	23291	GSK3B	FBXW11	56637	103583	Gsk3b	Fbxw11	1	0	1	0	1	1	1	1	1	y2h	0.0032	0.00217924	3.5	4.6	0.000130584	3.8	cell surface receptor linked signal transduction	cell surface receptor linked signal transduction
2932	23291	GSK3B	FBXW11	56637	103583	Gsk3b	Fbxw11	1	0	1	0	1	1	1	1	1	y2h	0.0032	0.00217924	3.5	4.6	0.000130584	3.8	anatomical structure formation	modification-dependent protein catabolic process
2932	23291	GSK3B	FBXW11	56637	103583	Gsk3b	Fbxw11	1	0	1	0	1	1	1	1	1	y2h	0.0032	0.00217924	3.5	4.6	0.000130584	3.8	anatomical structure formation	modification-dependent macromolecule catabolic process
2932	23291	GSK3B	FBXW11	56637	103583	Gsk3b	Fbxw11	1	0	1	0	1	1	1	1	1	y2h	0.0032	0.00217924	3.5	4.6	0.000130584	3.8	anatomical structure formation	cellular protein catabolic process
2932	23291	GSK3B	FBXW11	56637	103583	Gsk3b	Fbxw11	1	0	1	0	1	1	1	1	1	y2h	0.0032	0.00217924	3.5	4.6	0.000130584	3.8	anatomical structure formation	proteolysis involved in cellular protein catabolic process
2932	23291	GSK3B	FBXW11	56637	103583	Gsk3b	Fbxw11	1	0	1	0	1	1	1	1	1	y2h	0.0032	0.00217924	3.5	4.6	0.000130584	3.8	anatomical structure formation	cell surface receptor linked signal transduction
4841	79365	NONO	BHLHE41	53610	79362	Nono	Bhlhb3	1	0	1	0	1	1	1	0	0	y2h	0	0.0861876	4.1	15.2	0.415932	14.2	DNA repair	organ morphogenesis
1408	5187	CRY2	PER1	12953	18626	Cry2	Per1	1	0	1	1	1	1	1	0	0	unihi.y2h	0.0425479	0	9.2	17.7	2.73973e-05	10.9	circadian rhythm	circadian rhythm
4841	8553	NONO	BHLHE40	53610	20893	Nono	Bhlhb2	1	0	1	0	1	1	1	0	0	y2h	0	0.000859098	4.1	12.4	0.000351852	11.9	DNA repair	response to external stimulus
4841	4841	NONO	NONO	53610	53610	Nono	Nono	1	0	1	0	1	1	1	0	0	y2h	0	0	4.1	4.1	0	4.1	DNA repair	DNA repair
1408	8553	CRY2	BHLHE40	12953	20893	Cry2	Bhlhb2	1	0	1	0	1	1	1	0	0	y2h	0.0425479	0.000859098	9.2	12.4	0.000711864	11.3	circadian rhythm	circadian rhythm
1408	8864	CRY2	PER2	12953	18627	Cry2	Per2	1	0	1	1	1	1	1	0	0	unihi.y2h	0.0425479	0	9.2	20.1	0	13.5	circadian rhythm	circadian rhythm
4862	9575	NPAS2	CLOCK	18143	12753	Npas2	Clock	1	0	1	0	1	1	1	0	0	y2h	0	0	0.9	23	0	0.3	circadian rhythm	circadian rhythm
4862	9575	NPAS2	CLOCK	18143	12753	Npas2	Clock	1	0	1	0	1	1	1	0	0	y2h	0	0	0.9	23	0	0.3	positive regulation of transcription from RNA polymerase II promoter	positive regulation of transcription from RNA polymerase II promoter
4862	8553	NPAS2	BHLHE40	18143	20893	Npas2	Bhlhb2	1	0	1	0	1	1	1	0	0	y2h	0	0.000859098	0.9	12.4	9.38628e-05	1.1	circadian rhythm	circadian rhythm
5187	8553	PER1	BHLHE40	18626	20893	Per1	Bhlhb2	1	0	1	0	1	1	1	0	0	y2h	0	0.000859098	17.7	12.4	0	11.9	circadian rhythm	circadian rhythm
8553	9575	BHLHE40	CLOCK	20893	12753	Bhlhb2	Clock	1	0	1	0	1	1	1	0	0	y2h	0.000859098	0	12.4	23	0.0452461	19.8	circadian rhythm	circadian rhythm
4862	8553	NPAS2	BHLHE40	18143	20893	Npas2	Bhlhb2	1	0	1	0	1	1	1	0	0	y2h	0	0.000859098	0.9	12.4	9.38628e-05	1.1	positive regulation of transcription from RNA polymerase II promoter	response to external stimulus
8553	8864	BHLHE40	PER2	20893	18627	Bhlhb2	Per2	1	0	1	0	1	1	1	0	0	y2h	0.000859098	0	12.4	20.1	0	13.6	circadian rhythm	circadian rhythm
8553	8553	BHLHE40	BHLHE40	20893	20893	Bhlhb2	Bhlhb2	1	0	1	1	1	1	1	0	0	unihi.y2h	0.000859098	0.000859098	12.4	12.4	0.000162791	12.3	circadian rhythm	circadian rhythm
8864	9575	PER2	CLOCK	18627	12753	Per2	Clock	1	0	1	0	1	1	1	0	0	y2h	0	0	20.1	23	0	15.8	circadian rhythm	circadian rhythm
5187	8553	PER1	BHLHE40	18626	20893	Per1	Bhlhb2	1	0	1	0	1	1	1	0	0	y2h	0	0.000859098	17.7	12.4	0	11.9	response to external stimulus	response to external stimulus
5187	5187	PER1	PER1	18626	18626	Per1	Per1	0	1	0	0	1	1	1	0	0	man	0	0	17.7	17.7	0	11.6	circadian rhythm	circadian rhythm
5515	8553	PPP2CA	BHLHE40	19052	20893	Ppp2ca	Bhlhb2	1	0	1	0	1	1	1	1	0	y2h	0.023019	0.000859098	9.1	12.4	3.84615e-05	11.9	response to organic substance	response to external stimulus
5187	8864	PER1	PER2	18626	18627	Per1	Per2	0	1	1	1	1	1	1	0	0	man	0	0	17.7	20.1	0	13.3	circadian rhythm	circadian rhythm
5515	8553	PPP2CA	BHLHE40	19052	20893	Ppp2ca	Bhlhb2	1	0	1	0	1	1	1	1	0	y2h	0.023019	0.000859098	9.1	12.4	3.84615e-05	11.9	protein amino acid phosphorylation	response to external stimulus
8864	8864	PER2	PER2	18627	18627	Per2	Per2	0	1	0	0	1	1	1	0	0	man	0	0	20.1	20.1	0	14	circadian rhythm	circadian rhythm
5515	8553	PPP2CA	BHLHE40	19052	20893	Ppp2ca	Bhlhb2	1	0	1	0	1	1	1	1	0	y2h	0.023019	0.000859098	9.1	12.4	3.84615e-05	11.9	intracellular signaling cascade	response to external stimulus
8864	9572	PER2	NR1D1	18627	217166	Per2	Nr1d1	0	1	0	0	1	1	1	0	0	man	0	0	20.1	6.8	0	10.8	circadian rhythm	circadian rhythm
5515	8553	PPP2CA	BHLHE40	19052	20893	Ppp2ca	Bhlhb2	1	0	1	0	1	1	1	1	0	y2h	0.023019	0.000859098	9.1	12.4	3.84615e-05	11.9	tissue development	response to external stimulus
1407	8914	CRY1	TIMELESS	12952	21853	Cry1	Timeless	0	0	1	1	1	1	1	0	0	unihi	0	0.300916	19.8	19.6	0	19.8	circadian rhythm	circadian rhythm
5515	8553	PPP2CA	BHLHE40	19052	20893	Ppp2ca	Bhlhb2	1	0	1	0	1	1	1	1	0	y2h	0.023019	0.000859098	9.1	12.4	3.84615e-05	11.9	cell surface receptor linked signal transduction	response to external stimulus
5516	79365	PPP2CB	BHLHE41	19053	79362	Ppp2cb	Bhlhb3	1	0	1	0	1	1	1	1	0	y2h	0.0125003	0.0861876	9	15.2	0.0194237	12.5	modification-dependent protein catabolic process	organ morphogenesis
5516	79365	PPP2CB	BHLHE41	19053	79362	Ppp2cb	Bhlhb3	1	0	1	0	1	1	1	1	0	y2h	0.0125003	0.0861876	9	15.2	0.0194237	12.5	modification-dependent macromolecule catabolic process	organ morphogenesis
5516	79365	PPP2CB	BHLHE41	19053	79362	Ppp2cb	Bhlhb3	1	0	1	0	1	1	1	1	0	y2h	0.0125003	0.0861876	9	15.2	0.0194237	12.5	cellular protein catabolic process	organ morphogenesis
5516	79365	PPP2CB	BHLHE41	19053	79362	Ppp2cb	Bhlhb3	1	0	1	0	1	1	1	1	0	y2h	0.0125003	0.0861876	9	15.2	0.0194237	12.5	proteolysis involved in cellular protein catabolic process	organ morphogenesis
5516	79365	PPP2CB	BHLHE41	19053	79362	Ppp2cb	Bhlhb3	1	0	1	0	1	1	1	1	0	y2h	0.0125003	0.0861876	9	15.2	0.0194237	12.5	negative regulation of developmental process	organ morphogenesis
1408	8914	CRY2	TIMELESS	12953	21853	Cry2	Timeless	0	0	1	1	1	1	1	0	0	unihi	0.0425479	0.300916	9.2	19.6	0.347146	10.3	circadian rhythm	circadian rhythm
5518	8553	PPP2R1A	BHLHE40	51792	20893	Ppp2r1a	Bhlhb2	1	0	1	0	1	1	1	1	0	y2h	0.000944137	0.000859098	3.7	12.4	0.029	10.6	response to organic substance	response to external stimulus
5187	8914	PER1	TIMELESS	18626	21853	Per1	Timeless	0	0	1	1	1	1	1	0	0	unihi	0	0.300916	17.7	19.6	4.89796e-05	12.4	circadian rhythm	circadian rhythm
5518	8553	PPP2R1A	BHLHE40	51792	20893	Ppp2r1a	Bhlhb2	1	0	1	0	1	1	1	1	0	y2h	0.000944137	0.000859098	3.7	12.4	0.029	10.6	protein amino acid phosphorylation	response to external stimulus
8864	8914	PER2	TIMELESS	18627	21853	Per2	Timeless	0	0	1	1	1	1	1	0	0	unihi	0	0.300916	20.1	19.6	0	14.4	circadian rhythm	circadian rhythm
5518	8553	PPP2R1A	BHLHE40	51792	20893	Ppp2r1a	Bhlhb2	1	0	1	0	1	1	1	1	0	y2h	0.000944137	0.000859098	3.7	12.4	0.029	10.6	intracellular signaling cascade	response to external stimulus
9572	9572	NR1D1	NR1D1	217166	217166	Nr1d1	Nr1d1	0	0	1	1	1	1	1	0	0	unihi	0	0	6.8	6.8	0	6.7	circadian rhythm	circadian rhythm
5518	8553	PPP2R1A	BHLHE40	51792	20893	Ppp2r1a	Bhlhb2	1	0	1	0	1	1	1	1	0	y2h	0.000944137	0.000859098	3.7	12.4	0.029	10.6	cell surface receptor linked signal transduction	response to external stimulus
9575	56938	CLOCK	ARNTL2	12753	272322	Clock	Arntl2	0	0	1	1	1	1	1	0	0	unihi	0	0.37551	23	16.5	0	22.6	circadian rhythm	circadian rhythm
5518	8553	PPP2R1A	BHLHE40	51792	20893	Ppp2r1a	Bhlhb2	1	0	1	0	1	1	1	1	0	y2h	0.000944137	0.000859098	3.7	12.4	0.029	10.6	anatomical structure formation	response to external stimulus
5566	23291	PRKACA	FBXW11	18747	103583	Prkaca	Fbxw11	1	0	1	0	1	1	1	1	1	y2h	0.00144846	0.00217924	2.8	4.6	0.000136986	3.4	response to organic substance	modification-dependent protein catabolic process
5566	23291	PRKACA	FBXW11	18747	103583	Prkaca	Fbxw11	1	0	1	0	1	1	1	1	1	y2h	0.00144846	0.00217924	2.8	4.6	0.000136986	3.4	response to organic substance	modification-dependent macromolecule catabolic process
5566	23291	PRKACA	FBXW11	18747	103583	Prkaca	Fbxw11	1	0	1	0	1	1	1	1	1	y2h	0.00144846	0.00217924	2.8	4.6	0.000136986	3.4	response to organic substance	cellular protein catabolic process
5566	23291	PRKACA	FBXW11	18747	103583	Prkaca	Fbxw11	1	0	1	0	1	1	1	1	1	y2h	0.00144846	0.00217924	2.8	4.6	0.000136986	3.4	response to organic substance	proteolysis involved in cellular protein catabolic process
5566	23291	PRKACA	FBXW11	18747	103583	Prkaca	Fbxw11	1	0	1	0	1	1	1	1	1	y2h	0.00144846	0.00217924	2.8	4.6	0.000136986	3.4	response to organic substance	cell surface receptor linked signal transduction
5566	23291	PRKACA	FBXW11	18747	103583	Prkaca	Fbxw11	1	0	1	0	1	1	1	1	1	y2h	0.00144846	0.00217924	2.8	4.6	0.000136986	3.4	organ morphogenesis	modification-dependent protein catabolic process
5566	23291	PRKACA	FBXW11	18747	103583	Prkaca	Fbxw11	1	0	1	0	1	1	1	1	1	y2h	0.00144846	0.00217924	2.8	4.6	0.000136986	3.4	organ morphogenesis	modification-dependent macromolecule catabolic process
5566	23291	PRKACA	FBXW11	18747	103583	Prkaca	Fbxw11	1	0	1	0	1	1	1	1	1	y2h	0.00144846	0.00217924	2.8	4.6	0.000136986	3.4	organ morphogenesis	cellular protein catabolic process
5566	23291	PRKACA	FBXW11	18747	103583	Prkaca	Fbxw11	1	0	1	0	1	1	1	1	1	y2h	0.00144846	0.00217924	2.8	4.6	0.000136986	3.4	organ morphogenesis	proteolysis involved in cellular protein catabolic process
5566	23291	PRKACA	FBXW11	18747	103583	Prkaca	Fbxw11	1	0	1	0	1	1	1	1	1	y2h	0.00144846	0.00217924	2.8	4.6	0.000136986	3.4	organ morphogenesis	cell surface receptor linked signal transduction
5566	23291	PRKACA	FBXW11	18747	103583	Prkaca	Fbxw11	1	0	1	0	1	1	1	1	1	y2h	0.00144846	0.00217924	2.8	4.6	0.000136986	3.4	embryonic development	modification-dependent protein catabolic process
5566	23291	PRKACA	FBXW11	18747	103583	Prkaca	Fbxw11	1	0	1	0	1	1	1	1	1	y2h	0.00144846	0.00217924	2.8	4.6	0.000136986	3.4	embryonic development	modification-dependent macromolecule catabolic process
5566	23291	PRKACA	FBXW11	18747	103583	Prkaca	Fbxw11	1	0	1	0	1	1	1	1	1	y2h	0.00144846	0.00217924	2.8	4.6	0.000136986	3.4	embryonic development	cellular protein catabolic process
5566	23291	PRKACA	FBXW11	18747	103583	Prkaca	Fbxw11	1	0	1	0	1	1	1	1	1	y2h	0.00144846	0.00217924	2.8	4.6	0.000136986	3.4	embryonic development	proteolysis involved in cellular protein catabolic process
5566	23291	PRKACA	FBXW11	18747	103583	Prkaca	Fbxw11	1	0	1	0	1	1	1	1	1	y2h	0.00144846	0.00217924	2.8	4.6	0.000136986	3.4	embryonic development	cell surface receptor linked signal transduction
5566	23291	PRKACA	FBXW11	18747	103583	Prkaca	Fbxw11	1	0	1	0	1	1	1	1	1	y2h	0.00144846	0.00217924	2.8	4.6	0.000136986	3.4	protein amino acid phosphorylation	modification-dependent protein catabolic process
5566	23291	PRKACA	FBXW11	18747	103583	Prkaca	Fbxw11	1	0	1	0	1	1	1	1	1	y2h	0.00144846	0.00217924	2.8	4.6	0.000136986	3.4	protein amino acid phosphorylation	modification-dependent macromolecule catabolic process
5566	23291	PRKACA	FBXW11	18747	103583	Prkaca	Fbxw11	1	0	1	0	1	1	1	1	1	y2h	0.00144846	0.00217924	2.8	4.6	0.000136986	3.4	protein amino acid phosphorylation	cellular protein catabolic process
5566	23291	PRKACA	FBXW11	18747	103583	Prkaca	Fbxw11	1	0	1	0	1	1	1	1	1	y2h	0.00144846	0.00217924	2.8	4.6	0.000136986	3.4	protein amino acid phosphorylation	proteolysis involved in cellular protein catabolic process
5566	23291	PRKACA	FBXW11	18747	103583	Prkaca	Fbxw11	1	0	1	0	1	1	1	1	1	y2h	0.00144846	0.00217924	2.8	4.6	0.000136986	3.4	protein amino acid phosphorylation	cell surface receptor linked signal transduction
5566	23291	PRKACA	FBXW11	18747	103583	Prkaca	Fbxw11	1	0	1	0	1	1	1	1	1	y2h	0.00144846	0.00217924	2.8	4.6	0.000136986	3.4	intracellular signaling cascade	modification-dependent protein catabolic process
5566	23291	PRKACA	FBXW11	18747	103583	Prkaca	Fbxw11	1	0	1	0	1	1	1	1	1	y2h	0.00144846	0.00217924	2.8	4.6	0.000136986	3.4	intracellular signaling cascade	modification-dependent macromolecule catabolic process
5566	23291	PRKACA	FBXW11	18747	103583	Prkaca	Fbxw11	1	0	1	0	1	1	1	1	1	y2h	0.00144846	0.00217924	2.8	4.6	0.000136986	3.4	intracellular signaling cascade	cellular protein catabolic process
5566	23291	PRKACA	FBXW11	18747	103583	Prkaca	Fbxw11	1	0	1	0	1	1	1	1	1	y2h	0.00144846	0.00217924	2.8	4.6	0.000136986	3.4	intracellular signaling cascade	proteolysis involved in cellular protein catabolic process
5566	23291	PRKACA	FBXW11	18747	103583	Prkaca	Fbxw11	1	0	1	0	1	1	1	1	1	y2h	0.00144846	0.00217924	2.8	4.6	0.000136986	3.4	intracellular signaling cascade	cell surface receptor linked signal transduction
5566	23291	PRKACA	FBXW11	18747	103583	Prkaca	Fbxw11	1	0	1	0	1	1	1	1	1	y2h	0.00144846	0.00217924	2.8	4.6	0.000136986	3.4	tissue development	modification-dependent protein catabolic process
5566	23291	PRKACA	FBXW11	18747	103583	Prkaca	Fbxw11	1	0	1	0	1	1	1	1	1	y2h	0.00144846	0.00217924	2.8	4.6	0.000136986	3.4	tissue development	modification-dependent macromolecule catabolic process
5566	23291	PRKACA	FBXW11	18747	103583	Prkaca	Fbxw11	1	0	1	0	1	1	1	1	1	y2h	0.00144846	0.00217924	2.8	4.6	0.000136986	3.4	tissue development	cellular protein catabolic process
5566	23291	PRKACA	FBXW11	18747	103583	Prkaca	Fbxw11	1	0	1	0	1	1	1	1	1	y2h	0.00144846	0.00217924	2.8	4.6	0.000136986	3.4	tissue development	proteolysis involved in cellular protein catabolic process
5566	23291	PRKACA	FBXW11	18747	103583	Prkaca	Fbxw11	1	0	1	0	1	1	1	1	1	y2h	0.00144846	0.00217924	2.8	4.6	0.000136986	3.4	tissue development	cell surface receptor linked signal transduction
5566	23291	PRKACA	FBXW11	18747	103583	Prkaca	Fbxw11	1	0	1	0	1	1	1	1	1	y2h	0.00144846	0.00217924	2.8	4.6	0.000136986	3.4	anatomical structure formation	modification-dependent protein catabolic process
5566	23291	PRKACA	FBXW11	18747	103583	Prkaca	Fbxw11	1	0	1	0	1	1	1	1	1	y2h	0.00144846	0.00217924	2.8	4.6	0.000136986	3.4	anatomical structure formation	modification-dependent macromolecule catabolic process
5566	23291	PRKACA	FBXW11	18747	103583	Prkaca	Fbxw11	1	0	1	0	1	1	1	1	1	y2h	0.00144846	0.00217924	2.8	4.6	0.000136986	3.4	anatomical structure formation	cellular protein catabolic process
5566	23291	PRKACA	FBXW11	18747	103583	Prkaca	Fbxw11	1	0	1	0	1	1	1	1	1	y2h	0.00144846	0.00217924	2.8	4.6	0.000136986	3.4	anatomical structure formation	proteolysis involved in cellular protein catabolic process
5566	23291	PRKACA	FBXW11	18747	103583	Prkaca	Fbxw11	1	0	1	0	1	1	1	1	1	y2h	0.00144846	0.00217924	2.8	4.6	0.000136986	3.4	anatomical structure formation	cell surface receptor linked signal transduction
6095	79365	RORA	BHLHE41	19883	79362	Rora	Bhlhb3	1	0	1	0	1	1	1	0	0	y2h	3.89273e-05	0.0861876	21.9	15.2	0.000786111	19.7	positive regulation of transcription from RNA polymerase II promoter	organ morphogenesis
6095	79365	RORA	BHLHE41	19883	79362	Rora	Bhlhb3	1	0	1	0	1	1	1	0	0	y2h	3.89273e-05	0.0861876	21.9	15.2	0.000786111	19.7	anatomical structure formation	organ morphogenesis
1407	9575	CRY1	CLOCK	12952	12753	Cry1	Clock	1	0	1	0	1	1	1	0	0	y2h	0	0	19.8	23	0	20.7	DNA repair	circadian rhythm
6096	9575	RORB	CLOCK	225998	12753	Rorb	Clock	1	0	1	0	1	1	1	0	0	y2h	0.531295	0	22	23	0	23	organ morphogenesis	positive regulation of transcription from RNA polymerase II promoter
1407	4862	CRY1	NPAS2	12952	18143	Cry1	Npas2	1	0	1	0	1	1	1	0	0	y2h	0	0	19.8	0.9	0	22.1	DNA repair	circadian rhythm
6096	8553	RORB	BHLHE40	225998	20893	Rorb	Bhlhb2	1	0	1	0	1	1	1	0	0	y2h	0.531295	0.000859098	22	12.4	0.000978892	12.7	organ morphogenesis	response to external stimulus
1407	5187	CRY1	PER1	12952	18626	Cry1	Per1	1	0	1	1	1	1	1	0	0	unihi.y2h	0	0	19.8	17.7	0	18.6	DNA repair	circadian rhythm
1407	8553	CRY1	BHLHE40	12952	20893	Cry1	Bhlhb2	1	0	1	0	1	1	1	0	0	y2h	0	0.000859098	19.8	12.4	0	18.6	DNA repair	circadian rhythm
1407	8864	CRY1	PER2	12952	18627	Cry1	Per2	1	0	1	1	1	1	1	0	0	unihi.y2h	0	0	19.8	20.1	0	17.1	DNA repair	circadian rhythm
8553	9575	BHLHE40	CLOCK	20893	12753	Bhlhb2	Clock	1	0	1	0	1	1	1	0	0	y2h	0.000859098	0	12.4	23	0.0452461	19.8	response to external stimulus	positive regulation of transcription from RNA polymerase II promoter
1408	9575	CRY2	CLOCK	12953	12753	Cry2	Clock	1	0	1	0	1	1	1	0	0	y2h	0.0425479	0	9.2	23	0	0	DNA repair	circadian rhythm
8553	79365	BHLHE40	BHLHE41	20893	79362	Bhlhb2	Bhlhb3	1	0	1	1	1	1	1	0	0	unihi.y2h	0.000859098	0.0861876	12.4	15.2	3.04348e-05	12.9	response to external stimulus	organ morphogenesis
1408	4862	CRY2	NPAS2	12953	18143	Cry2	Npas2	1	0	1	0	1	1	1	0	0	y2h	0.0425479	0	9.2	0.9	0	1.6	DNA repair	circadian rhythm
1408	5187	CRY2	PER1	12953	18626	Cry2	Per1	1	0	1	1	1	1	1	0	0	unihi.y2h	0.0425479	0	9.2	17.7	2.73973e-05	10.9	DNA repair	circadian rhythm
1408	8553	CRY2	BHLHE40	12953	20893	Cry2	Bhlhb2	1	0	1	0	1	1	1	0	0	y2h	0.0425479	0.000859098	9.2	12.4	0.000711864	11.3	DNA repair	circadian rhythm
1408	8864	CRY2	PER2	12953	18627	Cry2	Per2	1	0	1	1	1	1	1	0	0	unihi.y2h	0.0425479	0	9.2	20.1	0	13.5	DNA repair	circadian rhythm
8553	79176	BHLHE40	FBXL15	20893	68431	Bhlhb2	Fbxl15	1	0	1	0	1	1	1	0	1	y2h	0.000859098	0.0111513	12.4	18.4	0.00113402	13.8	response to external stimulus	modification-dependent protein catabolic process
8553	79176	BHLHE40	FBXL15	20893	68431	Bhlhb2	Fbxl15	1	0	1	0	1	1	1	0	1	y2h	0.000859098	0.0111513	12.4	18.4	0.00113402	13.8	response to external stimulus	modification-dependent macromolecule catabolic process
8553	79176	BHLHE40	FBXL15	20893	68431	Bhlhb2	Fbxl15	1	0	1	0	1	1	1	0	1	y2h	0.000859098	0.0111513	12.4	18.4	0.00113402	13.8	response to external stimulus	cellular protein catabolic process
8553	79176	BHLHE40	FBXL15	20893	68431	Bhlhb2	Fbxl15	1	0	1	0	1	1	1	0	1	y2h	0.000859098	0.0111513	12.4	18.4	0.00113402	13.8	response to external stimulus	proteolysis involved in cellular protein catabolic process
1453	8864	CSNK1D	PER2	104318	18627	Csnk1d	Per2	1	0	1	1	1	1	1	1	0	unihi.y2h	0.029129	0	2.8	20.1	0	14	DNA repair	circadian rhythm
1454	9575	CSNK1E	CLOCK	27373	12753	Csnk1e	Clock	1	0	1	0	1	1	1	1	0	y2h	0.0768418	0	16.6	23	0	22.4	DNA repair	circadian rhythm
1454	5187	CSNK1E	PER1	27373	18626	Csnk1e	Per1	1	0	1	1	1	1	1	1	0	unihi.y2h	0.0768418	0	16.6	17.7	0	12.4	DNA repair	circadian rhythm
1454	8864	CSNK1E	PER2	27373	18627	Csnk1e	Per2	1	0	1	1	1	1	1	1	0	unihi.y2h	0.0768418	0	16.6	20.1	0	14.2	DNA repair	circadian rhythm
1454	8553	CSNK1E	BHLHE40	27373	20893	Csnk1e	Bhlhb2	1	0	1	0	1	1	1	1	0	y2h	0.0768418	0.000859098	16.6	12.4	9.55882e-05	13	DNA repair	circadian rhythm
8553	8553	BHLHE40	BHLHE40	20893	20893	Bhlhb2	Bhlhb2	1	0	1	1	1	1	1	0	0	unihi.y2h	0.000859098	0.000859098	12.4	12.4	0.000162791	12.3	response to external stimulus	response to external stimulus
4841	8553	NONO	BHLHE40	53610	20893	Nono	Bhlhb2	1	0	1	0	1	1	1	0	0	y2h	0	0.000859098	4.1	12.4	0.000351852	11.9	DNA repair	circadian rhythm
4841	5187	NONO	PER1	53610	18626	Nono	Per1	0	1	0	0	1	1	1	0	0	man	0	0	4.1	17.7	0	11.3	DNA repair	circadian rhythm
4841	8864	NONO	PER2	53610	18627	Nono	Per2	0	1	0	0	1	1	1	0	0	man	0	0	4.1	20.1	0	14	DNA repair	circadian rhythm
1407	8914	CRY1	TIMELESS	12952	21853	Cry1	Timeless	0	0	1	1	1	1	1	0	0	unihi	0	0.300916	19.8	19.6	0	19.8	DNA repair	circadian rhythm
9575	79365	CLOCK	BHLHE41	12753	79362	Clock	Bhlhb3	1	0	1	0	1	1	1	0	0	y2h	0	0.0861876	23	15.2	0	22.4	positive regulation of transcription from RNA polymerase II promoter	organ morphogenesis
23291	79365	FBXW11	BHLHE41	103583	79362	Fbxw11	Bhlhb3	1	0	1	0	1	1	1	1	0	y2h	0.00217924	0.0861876	4.6	15.2	0.611867	11.4	modification-dependent protein catabolic process	organ morphogenesis
23291	79365	FBXW11	BHLHE41	103583	79362	Fbxw11	Bhlhb3	1	0	1	0	1	1	1	1	0	y2h	0.00217924	0.0861876	4.6	15.2	0.611867	11.4	modification-dependent macromolecule catabolic process	organ morphogenesis
23291	79365	FBXW11	BHLHE41	103583	79362	Fbxw11	Bhlhb3	1	0	1	0	1	1	1	1	0	y2h	0.00217924	0.0861876	4.6	15.2	0.611867	11.4	cellular protein catabolic process	organ morphogenesis
23291	79365	FBXW11	BHLHE41	103583	79362	Fbxw11	Bhlhb3	1	0	1	0	1	1	1	1	0	y2h	0.00217924	0.0861876	4.6	15.2	0.611867	11.4	proteolysis involved in cellular protein catabolic process	organ morphogenesis
23291	79365	FBXW11	BHLHE41	103583	79362	Fbxw11	Bhlhb3	1	0	1	0	1	1	1	1	0	y2h	0.00217924	0.0861876	4.6	15.2	0.611867	11.4	cell surface receptor linked signal transduction	organ morphogenesis
51655	79365	RASD1	BHLHE41	19416	79362	Rasd1	Bhlhb3	1	0	1	0	1	1	1	0	0	y2h	0.233067	0.0861876	15.8	15.2	0.0249938	15.5	intracellular signaling cascade	organ morphogenesis
51655	79365	RASD1	BHLHE41	19416	79362	Rasd1	Bhlhb3	1	0	1	0	1	1	1	0	0	y2h	0.233067	0.0861876	15.8	15.2	0.0249938	15.5	cell surface receptor linked signal transduction	organ morphogenesis
79365	79365	BHLHE41	BHLHE41	79362	79362	Bhlhb3	Bhlhb3	1	0	1	0	1	1	1	0	0	y2h	0.0861876	0.0861876	15.2	15.2	0.0376299	15.2	organ morphogenesis	organ morphogenesis
1408	8914	CRY2	TIMELESS	12953	21853	Cry2	Timeless	0	0	1	1	1	1	1	0	0	unihi	0.0425479	0.300916	9.2	19.6	0.347146	10.3	DNA repair	circadian rhythm
1453	5187	CSNK1D	PER1	104318	18626	Csnk1d	Per1	0	0	1	1	1	1	1	1	0	unihi	0.029129	0	2.8	17.7	0.000747899	10.8	DNA repair	circadian rhythm
1111	8914	CHEK1	TIMELESS	12649	21853	Chek1	Timeless	0	0	1	1	0	0	1	0	0	ext	0.0379367	0.300916	12	19.6	0.12388	14.8	DNA repair	circadian rhythm
5187	5187	PER1	PER1	18626	18626	Per1	Per1	0	1	0	0	1	1	1	0	0	man	0	0	17.7	17.7	0	11.6	response to external stimulus	response to external stimulus
2033	9575	EP300	CLOCK	328572	12753	Ep300	Clock	0	0	1	1	0	0	1	0	0	ext	0.0181655	0	5.6	23	0	0.6	embryonic development	circadian rhythm
2033	4862	EP300	NPAS2	328572	18143	Ep300	Npas2	0	0	1	1	0	0	1	0	0	ext	0.0181655	0	5.6	0.9	0	1.6	embryonic development	circadian rhythm
2034	56938	EPAS1	ARNTL2	13819	272322	Epas1	Arntl2	0	0	1	1	0	0	1	0	0	ext	0.239529	0.37551	7.4	16.5	0.398957	9.4	embryonic development	circadian rhythm
3091	5187	HIF1A	PER1	15251	18626	Hif1a	Per1	0	0	1	1	0	0	1	0	0	ext	0.00680597	0	9.6	17.7	0	11.4	embryonic development	circadian rhythm
4841	5187	NONO	PER1	53610	18626	Nono	Per1	0	1	0	0	1	1	1	0	0	man	0	0	4.1	17.7	0	11.3	DNA repair	response to external stimulus
2034	56938	EPAS1	ARNTL2	13819	272322	Epas1	Arntl2	0	0	1	1	0	0	1	0	0	ext	0.239529	0.37551	7.4	16.5	0.398957	9.4	hemopoiesis	circadian rhythm
3091	5187	HIF1A	PER1	15251	18626	Hif1a	Per1	0	0	1	1	0	0	1	0	0	ext	0.00680597	0	9.6	17.7	0	11.4	hemopoiesis	circadian rhythm
2034	56938	EPAS1	ARNTL2	13819	272322	Epas1	Arntl2	0	0	1	1	0	0	1	0	0	ext	0.239529	0.37551	7.4	16.5	0.398957	9.4	hemopoietic or lymphoid organ development	circadian rhythm
3091	5187	HIF1A	PER1	15251	18626	Hif1a	Per1	0	0	1	1	0	0	1	0	0	ext	0.00680597	0	9.6	17.7	0	11.4	hemopoietic or lymphoid organ development	circadian rhythm
5578	8864	PRKCA	PER2	18750	18627	Prkca	Per2	0	1	0	0	1	1	1	1	0	man	0.00678513	0	7.5	20.1	0	13.6	homeostatic process	circadian rhythm
1387	4862	CREBBP	NPAS2	12914	18143	Crebbp	Npas2	0	0	1	1	0	0	1	0	0	ext	0.000545079	0	3.6	0.9	0	1.8	homeostatic process	circadian rhythm
2033	9575	EP300	CLOCK	328572	12753	Ep300	Clock	0	0	1	1	0	0	1	0	0	ext	0.0181655	0	5.6	23	0	0.6	homeostatic process	circadian rhythm
2033	4862	EP300	NPAS2	328572	18143	Ep300	Npas2	0	0	1	1	0	0	1	0	0	ext	0.0181655	0	5.6	0.9	0	1.6	homeostatic process	circadian rhythm
2034	56938	EPAS1	ARNTL2	13819	272322	Epas1	Arntl2	0	0	1	1	0	0	1	0	0	ext	0.239529	0.37551	7.4	16.5	0.398957	9.4	homeostatic process	circadian rhythm
406	1407	ARNTL	CRY1	11865	12952	Arntl	Cry1	1	0	1	1	1	1	1	0	0	unihi.y2h	0	0	22.4	19.8	0	21.2	circadian rhythm	DNA repair
406	1408	ARNTL	CRY2	11865	12953	Arntl	Cry2	1	0	1	0	1	1	1	0	0	y2h	0	0.0425479	22.4	9.2	0	22.5	circadian rhythm	DNA repair
406	1454	ARNTL	CSNK1E	11865	27373	Arntl	Csnk1e	1	0	1	1	1	1	1	0	1	unihi.y2h	0	0.0768418	22.4	16.6	0	22.1	circadian rhythm	DNA repair
1407	1454	CRY1	CSNK1E	12952	27373	Cry1	Csnk1e	1	1	1	1	1	1	1	0	1	man.y2h	0	0.0768418	19.8	16.6	0	19.6	circadian rhythm	DNA repair
1407	1453	CRY1	CSNK1D	12952	104318	Cry1	Csnk1d	0	1	0	0	1	1	1	0	1	man	0	0.029129	19.8	2.8	0	20.2	circadian rhythm	DNA repair
1408	1453	CRY2	CSNK1D	12953	104318	Cry2	Csnk1d	0	1	0	0	1	1	1	0	1	man	0.0425479	0.029129	9.2	2.8	0.0819775	7.1	circadian rhythm	DNA repair
8914	11277	TIMELESS	TREX1	21853	22040	Timeless	Trex1	0	0	1	1	0	1	0	0	0	ext	0.300916	0.0486737	19.6	3.7	0.385361	23.8	circadian rhythm	DNA repair
406	2033	ARNTL	EP300	11865	328572	Arntl	Ep300	0	0	1	1	0	1	0	0	0	ext	0	0.0181655	22.4	5.6	0	22.9	circadian rhythm	embryonic development
3091	5187	HIF1A	PER1	15251	18626	Hif1a	Per1	0	0	1	1	0	0	1	0	0	ext	0.00680597	0	9.6	17.7	0	11.4	homeostatic process	circadian rhythm
6774	8553	STAT3	BHLHE40	20848	20893	Stat3	Bhlhb2	0	0	1	1	0	0	1	0	0	ext	0.00255469	0.000859098	3.2	12.4	0.177285	9.1	homeostatic process	circadian rhythm
2034	56938	EPAS1	ARNTL2	13819	272322	Epas1	Arntl2	0	0	1	1	0	0	1	0	0	ext	0.239529	0.37551	7.4	16.5	0.398957	9.4	immune system development	circadian rhythm
3091	5187	HIF1A	PER1	15251	18626	Hif1a	Per1	0	0	1	1	0	0	1	0	0	ext	0.00680597	0	9.6	17.7	0	11.4	immune system development	circadian rhythm
1387	4862	CREBBP	NPAS2	12914	18143	Crebbp	Npas2	0	0	1	1	0	0	1	0	0	ext	0.000545079	0	3.6	0.9	0	1.8	interspecies interaction between organisms	circadian rhythm
2033	9575	EP300	CLOCK	328572	12753	Ep300	Clock	0	0	1	1	0	0	1	0	0	ext	0.0181655	0	5.6	23	0	0.6	interspecies interaction between organisms	circadian rhythm
2033	4862	EP300	NPAS2	328572	18143	Ep300	Npas2	0	0	1	1	0	0	1	0	0	ext	0.0181655	0	5.6	0.9	0	1.6	interspecies interaction between organisms	circadian rhythm
6774	8553	STAT3	BHLHE40	20848	20893	Stat3	Bhlhb2	0	0	1	1	0	0	1	0	0	ext	0.00255469	0.000859098	3.2	12.4	0.177285	9.1	interspecies interaction between organisms	circadian rhythm
406	2034	ARNTL	EPAS1	11865	13819	Arntl	Epas1	0	0	1	1	0	1	0	0	0	ext	0	0.239529	22.4	7.4	0	22.5	circadian rhythm	embryonic development
406	3091	ARNTL	HIF1A	11865	15251	Arntl	Hif1a	0	0	1	1	0	1	0	0	0	ext	0	0.00680597	22.4	9.6	0	22.4	circadian rhythm	embryonic development
1407	5536	CRY1	PPP5C	12952	19060	Cry1	Ppp5c	0	1	0	0	1	1	1	0	1	man	0	0.378185	19.8	5.7	0	19.9	DNA repair	mitotic cell cycle
1407	5536	CRY1	PPP5C	12952	19060	Cry1	Ppp5c	0	1	0	0	1	1	1	0	1	man	0	0.378185	19.8	5.7	0	19.9	DNA repair	intracellular signaling cascade
406	2034	ARNTL	EPAS1	11865	13819	Arntl	Epas1	0	0	1	1	0	1	0	0	0	ext	0	0.239529	22.4	7.4	0	22.5	circadian rhythm	hemopoiesis
406	3091	ARNTL	HIF1A	11865	15251	Arntl	Hif1a	0	0	1	1	0	1	0	0	0	ext	0	0.00680597	22.4	9.6	0	22.4	circadian rhythm	hemopoiesis
4862	5914	NPAS2	RARA	18143	19401	Npas2	Rara	0	0	1	1	0	1	0	0	0	ext	0	0.329247	0.9	18	0	0.6	circadian rhythm	hemopoiesis
406	2034	ARNTL	EPAS1	11865	13819	Arntl	Epas1	0	0	1	1	0	1	0	0	0	ext	0	0.239529	22.4	7.4	0	22.5	circadian rhythm	hemopoietic or lymphoid organ development
406	3091	ARNTL	HIF1A	11865	15251	Arntl	Hif1a	0	0	1	1	0	1	0	0	0	ext	0	0.00680597	22.4	9.6	0	22.4	circadian rhythm	hemopoietic or lymphoid organ development
4862	5914	NPAS2	RARA	18143	19401	Npas2	Rara	0	0	1	1	0	1	0	0	0	ext	0	0.329247	0.9	18	0	0.6	circadian rhythm	hemopoietic or lymphoid organ development
1408	2932	CRY2	GSK3B	12953	56637	Cry2	Gsk3b	0	1	0	0	1	1	1	0	1	man	0.0425479	0.0032	9.2	3.5	0.0327913	6.3	DNA repair	organ morphogenesis
1408	2932	CRY2	GSK3B	12953	56637	Cry2	Gsk3b	0	1	0	0	1	1	1	0	1	man	0.0425479	0.0032	9.2	3.5	0.0327913	6.3	DNA repair	protein amino acid phosphorylation
1408	2932	CRY2	GSK3B	12953	56637	Cry2	Gsk3b	0	1	0	0	1	1	1	0	1	man	0.0425479	0.0032	9.2	3.5	0.0327913	6.3	DNA repair	intracellular signaling cascade
1408	2932	CRY2	GSK3B	12953	56637	Cry2	Gsk3b	0	1	0	0	1	1	1	0	1	man	0.0425479	0.0032	9.2	3.5	0.0327913	6.3	DNA repair	negative regulation of developmental process
1408	2932	CRY2	GSK3B	12953	56637	Cry2	Gsk3b	0	1	0	0	1	1	1	0	1	man	0.0425479	0.0032	9.2	3.5	0.0327913	6.3	DNA repair	cell surface receptor linked signal transduction
1408	2932	CRY2	GSK3B	12953	56637	Cry2	Gsk3b	0	1	0	0	1	1	1	0	1	man	0.0425479	0.0032	9.2	3.5	0.0327913	6.3	DNA repair	anatomical structure formation
406	2033	ARNTL	EP300	11865	328572	Arntl	Ep300	0	0	1	1	0	1	0	0	0	ext	0	0.0181655	22.4	5.6	0	22.9	circadian rhythm	homeostatic process
406	2034	ARNTL	EPAS1	11865	13819	Arntl	Epas1	0	0	1	1	0	1	0	0	0	ext	0	0.239529	22.4	7.4	0	22.5	circadian rhythm	homeostatic process
406	3091	ARNTL	HIF1A	11865	15251	Arntl	Hif1a	0	0	1	1	0	1	0	0	0	ext	0	0.00680597	22.4	9.6	0	22.4	circadian rhythm	homeostatic process
406	2034	ARNTL	EPAS1	11865	13819	Arntl	Epas1	0	0	1	1	0	1	0	0	0	ext	0	0.239529	22.4	7.4	0	22.5	circadian rhythm	immune system development
1407	26224	CRY1	FBXL3	12952	50789	Cry1	Fbxl3	0	1	0	0	1	1	1	0	1	man	0	0.00326556	19.8	4.7	0	20.1	DNA repair	modification-dependent protein catabolic process
1407	26224	CRY1	FBXL3	12952	50789	Cry1	Fbxl3	0	1	0	0	1	1	1	0	1	man	0	0.00326556	19.8	4.7	0	20.1	DNA repair	modification-dependent macromolecule catabolic process
1407	26224	CRY1	FBXL3	12952	50789	Cry1	Fbxl3	0	1	0	0	1	1	1	0	1	man	0	0.00326556	19.8	4.7	0	20.1	DNA repair	cellular protein catabolic process
1407	26224	CRY1	FBXL3	12952	50789	Cry1	Fbxl3	0	1	0	0	1	1	1	0	1	man	0	0.00326556	19.8	4.7	0	20.1	DNA repair	proteolysis involved in cellular protein catabolic process
406	3091	ARNTL	HIF1A	11865	15251	Arntl	Hif1a	0	0	1	1	0	1	0	0	0	ext	0	0.00680597	22.4	9.6	0	22.4	circadian rhythm	immune system development
4862	5914	NPAS2	RARA	18143	19401	Npas2	Rara	0	0	1	1	0	1	0	0	0	ext	0	0.329247	0.9	18	0	0.6	circadian rhythm	immune system development
8864	8945	PER2	BTRC	18627	12234	Per2	Btrc	0	1	0	0	1	1	1	0	1	man	0	0.0144088	20.1	5.2	0	13.8	circadian rhythm	interspecies interaction between organisms
406	2033	ARNTL	EP300	11865	328572	Arntl	Ep300	0	0	1	1	0	1	0	0	0	ext	0	0.0181655	22.4	5.6	0	22.9	circadian rhythm	interspecies interaction between organisms
1408	26224	CRY2	FBXL3	12953	50789	Cry2	Fbxl3	0	1	0	0	1	1	1	0	1	man	0.0425479	0.00326556	9.2	4.7	0.0099	7.3	DNA repair	modification-dependent protein catabolic process
1408	26224	CRY2	FBXL3	12953	50789	Cry2	Fbxl3	0	1	0	0	1	1	1	0	1	man	0.0425479	0.00326556	9.2	4.7	0.0099	7.3	DNA repair	modification-dependent macromolecule catabolic process
1408	26224	CRY2	FBXL3	12953	50789	Cry2	Fbxl3	0	1	0	0	1	1	1	0	1	man	0.0425479	0.00326556	9.2	4.7	0.0099	7.3	DNA repair	cellular protein catabolic process
1408	26224	CRY2	FBXL3	12953	50789	Cry2	Fbxl3	0	1	0	0	1	1	1	0	1	man	0.0425479	0.00326556	9.2	4.7	0.0099	7.3	DNA repair	proteolysis involved in cellular protein catabolic process
406	8850	ARNTL	KAT2B	11865	18519	Arntl	Kat2b	0	0	1	1	0	1	0	0	0	ext	0	0	22.4	8.4	0	22.6	circadian rhythm	interspecies interaction between organisms
406	79365	ARNTL	BHLHE41	11865	79362	Arntl	Bhlhb3	0	1	0	0	1	1	1	0	0	man	0	0.0861876	22.4	15.2	0	22.1	positive regulation of transcription from RNA polymerase II promoter	organ morphogenesis
4862	6256	NPAS2	RXRA	18143	20181	Npas2	Rxra	0	0	1	1	0	1	0	0	0	ext	0	0.00211631	0.9	6.9	0	1.6	circadian rhythm	interspecies interaction between organisms
4862	8850	NPAS2	KAT2B	18143	18519	Npas2	Kat2b	0	0	1	1	0	1	0	0	0	ext	0	0	0.9	8.4	0	1.6	circadian rhythm	interspecies interaction between organisms
406	1457	ARNTL	CSNK2A1	11865	12995	Arntl	Csnk2a1	0	1	0	0	1	1	1	0	1	man	0	0.000167929	22.4	6.5	0	22.8	positive regulation of transcription from RNA polymerase II promoter	protein amino acid phosphorylation
406	1457	ARNTL	CSNK2A1	11865	12995	Arntl	Csnk2a1	0	1	0	0	1	1	1	0	1	man	0	0.000167929	22.4	6.5	0	22.8	positive regulation of transcription from RNA polymerase II promoter	cell surface receptor linked signal transduction
1457	5515	CSNK2A1	PPP2CA	12995	19052	Csnk2a1	Ppp2ca	0	1	0	0	1	1	1	1	1	man	0.000167929	0.023019	6.5	9.1	5.85937e-05	7.3	protein amino acid phosphorylation	response to organic substance
1457	5515	CSNK2A1	PPP2CA	12995	19052	Csnk2a1	Ppp2ca	0	1	0	0	1	1	1	1	1	man	0.000167929	0.023019	6.5	9.1	5.85937e-05	7.3	protein amino acid phosphorylation	protein amino acid phosphorylation
1457	5515	CSNK2A1	PPP2CA	12995	19052	Csnk2a1	Ppp2ca	0	1	0	0	1	1	1	1	1	man	0.000167929	0.023019	6.5	9.1	5.85937e-05	7.3	protein amino acid phosphorylation	intracellular signaling cascade
1457	5515	CSNK2A1	PPP2CA	12995	19052	Csnk2a1	Ppp2ca	0	1	0	0	1	1	1	1	1	man	0.000167929	0.023019	6.5	9.1	5.85937e-05	7.3	protein amino acid phosphorylation	tissue development
1457	5515	CSNK2A1	PPP2CA	12995	19052	Csnk2a1	Ppp2ca	0	1	0	0	1	1	1	1	1	man	0.000167929	0.023019	6.5	9.1	5.85937e-05	7.3	protein amino acid phosphorylation	cell surface receptor linked signal transduction
1457	5515	CSNK2A1	PPP2CA	12995	19052	Csnk2a1	Ppp2ca	0	1	0	0	1	1	1	1	1	man	0.000167929	0.023019	6.5	9.1	5.85937e-05	7.3	cell surface receptor linked signal transduction	response to organic substance
1457	5515	CSNK2A1	PPP2CA	12995	19052	Csnk2a1	Ppp2ca	0	1	0	0	1	1	1	1	1	man	0.000167929	0.023019	6.5	9.1	5.85937e-05	7.3	cell surface receptor linked signal transduction	protein amino acid phosphorylation
1457	5515	CSNK2A1	PPP2CA	12995	19052	Csnk2a1	Ppp2ca	0	1	0	0	1	1	1	1	1	man	0.000167929	0.023019	6.5	9.1	5.85937e-05	7.3	cell surface receptor linked signal transduction	intracellular signaling cascade
1457	5515	CSNK2A1	PPP2CA	12995	19052	Csnk2a1	Ppp2ca	0	1	0	0	1	1	1	1	1	man	0.000167929	0.023019	6.5	9.1	5.85937e-05	7.3	cell surface receptor linked signal transduction	tissue development
1457	5515	CSNK2A1	PPP2CA	12995	19052	Csnk2a1	Ppp2ca	0	1	0	0	1	1	1	1	1	man	0.000167929	0.023019	6.5	9.1	5.85937e-05	7.3	cell surface receptor linked signal transduction	cell surface receptor linked signal transduction
7329	8553	UBE2I	BHLHE40	22196	20893	Ube2i	Bhlhb2	0	0	1	1	0	0	1	0	0	ext	0.000613374	0.000859098	5.1	12.4	0.00408706	10.8	interspecies interaction between organisms	circadian rhythm
2146	9575	EZH2	CLOCK	14056	12753	Ezh2	Clock	0	1	0	0	1	1	1	0	0	man	0.00842676	0	5.7	23	0	0.4	chromatin modification	positive regulation of transcription from RNA polymerase II promoter
8850	9575	KAT2B	CLOCK	18519	12753	Kat2b	Clock	0	0	1	1	0	0	1	0	0	ext	0	0	8.4	23	0	0.3	interspecies interaction between organisms	circadian rhythm
2146	9575	EZH2	CLOCK	14056	12753	Ezh2	Clock	0	1	0	0	1	1	1	0	0	man	0.00842676	0	5.7	23	0	0.4	chromatin organization	positive regulation of transcription from RNA polymerase II promoter
1407	5536	CRY1	PPP5C	12952	19060	Cry1	Ppp5c	0	1	0	0	1	1	1	0	1	man	0	0.378185	19.8	5.7	0	19.9	circadian rhythm	intracellular signaling cascade
1408	2932	CRY2	GSK3B	12953	56637	Cry2	Gsk3b	0	1	0	0	1	1	1	0	1	man	0.0425479	0.0032	9.2	3.5	0.0327913	6.3	circadian rhythm	intracellular signaling cascade
406	2146	ARNTL	EZH2	11865	14056	Arntl	Ezh2	0	1	0	0	1	1	1	0	0	man	0	0.00842676	22.4	5.7	0	22.8	positive regulation of transcription from RNA polymerase II promoter	chromatin modification
406	2146	ARNTL	EZH2	11865	14056	Arntl	Ezh2	0	1	0	0	1	1	1	0	0	man	0	0.00842676	22.4	5.7	0	22.8	positive regulation of transcription from RNA polymerase II promoter	chromatin organization
5515	5515	PPP2CA	PPP2CA	19052	19052	Ppp2ca	Ppp2ca	0	1	0	0	1	1	1	1	1	man	0.023019	0.023019	9.1	9.1	0.00741986	9.1	response to organic substance	response to organic substance
5515	5515	PPP2CA	PPP2CA	19052	19052	Ppp2ca	Ppp2ca	0	1	0	0	1	1	1	1	1	man	0.023019	0.023019	9.1	9.1	0.00741986	9.1	response to organic substance	protein amino acid phosphorylation
5515	5515	PPP2CA	PPP2CA	19052	19052	Ppp2ca	Ppp2ca	0	1	0	0	1	1	1	1	1	man	0.023019	0.023019	9.1	9.1	0.00741986	9.1	response to organic substance	intracellular signaling cascade
5515	5515	PPP2CA	PPP2CA	19052	19052	Ppp2ca	Ppp2ca	0	1	0	0	1	1	1	1	1	man	0.023019	0.023019	9.1	9.1	0.00741986	9.1	response to organic substance	tissue development
5515	5515	PPP2CA	PPP2CA	19052	19052	Ppp2ca	Ppp2ca	0	1	0	0	1	1	1	1	1	man	0.023019	0.023019	9.1	9.1	0.00741986	9.1	response to organic substance	cell surface receptor linked signal transduction
5515	5515	PPP2CA	PPP2CA	19052	19052	Ppp2ca	Ppp2ca	0	1	0	0	1	1	1	1	1	man	0.023019	0.023019	9.1	9.1	0.00741986	9.1	protein amino acid phosphorylation	response to organic substance
5515	5515	PPP2CA	PPP2CA	19052	19052	Ppp2ca	Ppp2ca	0	1	0	0	1	1	1	1	1	man	0.023019	0.023019	9.1	9.1	0.00741986	9.1	protein amino acid phosphorylation	protein amino acid phosphorylation
5515	5515	PPP2CA	PPP2CA	19052	19052	Ppp2ca	Ppp2ca	0	1	0	0	1	1	1	1	1	man	0.023019	0.023019	9.1	9.1	0.00741986	9.1	protein amino acid phosphorylation	intracellular signaling cascade
5515	5515	PPP2CA	PPP2CA	19052	19052	Ppp2ca	Ppp2ca	0	1	0	0	1	1	1	1	1	man	0.023019	0.023019	9.1	9.1	0.00741986	9.1	protein amino acid phosphorylation	tissue development
5515	5515	PPP2CA	PPP2CA	19052	19052	Ppp2ca	Ppp2ca	0	1	0	0	1	1	1	1	1	man	0.023019	0.023019	9.1	9.1	0.00741986	9.1	protein amino acid phosphorylation	cell surface receptor linked signal transduction
5515	5515	PPP2CA	PPP2CA	19052	19052	Ppp2ca	Ppp2ca	0	1	0	0	1	1	1	1	1	man	0.023019	0.023019	9.1	9.1	0.00741986	9.1	intracellular signaling cascade	response to organic substance
5515	5515	PPP2CA	PPP2CA	19052	19052	Ppp2ca	Ppp2ca	0	1	0	0	1	1	1	1	1	man	0.023019	0.023019	9.1	9.1	0.00741986	9.1	intracellular signaling cascade	protein amino acid phosphorylation
5515	5515	PPP2CA	PPP2CA	19052	19052	Ppp2ca	Ppp2ca	0	1	0	0	1	1	1	1	1	man	0.023019	0.023019	9.1	9.1	0.00741986	9.1	intracellular signaling cascade	intracellular signaling cascade
5515	5515	PPP2CA	PPP2CA	19052	19052	Ppp2ca	Ppp2ca	0	1	0	0	1	1	1	1	1	man	0.023019	0.023019	9.1	9.1	0.00741986	9.1	intracellular signaling cascade	tissue development
5515	5515	PPP2CA	PPP2CA	19052	19052	Ppp2ca	Ppp2ca	0	1	0	0	1	1	1	1	1	man	0.023019	0.023019	9.1	9.1	0.00741986	9.1	intracellular signaling cascade	cell surface receptor linked signal transduction
5515	5515	PPP2CA	PPP2CA	19052	19052	Ppp2ca	Ppp2ca	0	1	0	0	1	1	1	1	1	man	0.023019	0.023019	9.1	9.1	0.00741986	9.1	tissue development	response to organic substance
5515	5515	PPP2CA	PPP2CA	19052	19052	Ppp2ca	Ppp2ca	0	1	0	0	1	1	1	1	1	man	0.023019	0.023019	9.1	9.1	0.00741986	9.1	tissue development	protein amino acid phosphorylation
5515	5515	PPP2CA	PPP2CA	19052	19052	Ppp2ca	Ppp2ca	0	1	0	0	1	1	1	1	1	man	0.023019	0.023019	9.1	9.1	0.00741986	9.1	tissue development	intracellular signaling cascade
5515	5515	PPP2CA	PPP2CA	19052	19052	Ppp2ca	Ppp2ca	0	1	0	0	1	1	1	1	1	man	0.023019	0.023019	9.1	9.1	0.00741986	9.1	tissue development	tissue development
5515	5515	PPP2CA	PPP2CA	19052	19052	Ppp2ca	Ppp2ca	0	1	0	0	1	1	1	1	1	man	0.023019	0.023019	9.1	9.1	0.00741986	9.1	tissue development	cell surface receptor linked signal transduction
5515	5515	PPP2CA	PPP2CA	19052	19052	Ppp2ca	Ppp2ca	0	1	0	0	1	1	1	1	1	man	0.023019	0.023019	9.1	9.1	0.00741986	9.1	cell surface receptor linked signal transduction	response to organic substance
5515	5515	PPP2CA	PPP2CA	19052	19052	Ppp2ca	Ppp2ca	0	1	0	0	1	1	1	1	1	man	0.023019	0.023019	9.1	9.1	0.00741986	9.1	cell surface receptor linked signal transduction	protein amino acid phosphorylation
5515	5515	PPP2CA	PPP2CA	19052	19052	Ppp2ca	Ppp2ca	0	1	0	0	1	1	1	1	1	man	0.023019	0.023019	9.1	9.1	0.00741986	9.1	cell surface receptor linked signal transduction	intracellular signaling cascade
5515	5515	PPP2CA	PPP2CA	19052	19052	Ppp2ca	Ppp2ca	0	1	0	0	1	1	1	1	1	man	0.023019	0.023019	9.1	9.1	0.00741986	9.1	cell surface receptor linked signal transduction	tissue development
5515	5515	PPP2CA	PPP2CA	19052	19052	Ppp2ca	Ppp2ca	0	1	0	0	1	1	1	1	1	man	0.023019	0.023019	9.1	9.1	0.00741986	9.1	cell surface receptor linked signal transduction	cell surface receptor linked signal transduction
5515	5536	PPP2CA	PPP5C	19052	19060	Ppp2ca	Ppp5c	0	1	0	0	1	1	1	1	1	man	0.023019	0.378185	9.1	5.7	0.0456983	7.6	response to organic substance	mitotic cell cycle
5515	5536	PPP2CA	PPP5C	19052	19060	Ppp2ca	Ppp5c	0	1	0	0	1	1	1	1	1	man	0.023019	0.378185	9.1	5.7	0.0456983	7.6	response to organic substance	intracellular signaling cascade
5515	5536	PPP2CA	PPP5C	19052	19060	Ppp2ca	Ppp5c	0	1	0	0	1	1	1	1	1	man	0.023019	0.378185	9.1	5.7	0.0456983	7.6	protein amino acid phosphorylation	mitotic cell cycle
5515	5536	PPP2CA	PPP5C	19052	19060	Ppp2ca	Ppp5c	0	1	0	0	1	1	1	1	1	man	0.023019	0.378185	9.1	5.7	0.0456983	7.6	protein amino acid phosphorylation	intracellular signaling cascade
5515	5536	PPP2CA	PPP5C	19052	19060	Ppp2ca	Ppp5c	0	1	0	0	1	1	1	1	1	man	0.023019	0.378185	9.1	5.7	0.0456983	7.6	intracellular signaling cascade	mitotic cell cycle
5515	5536	PPP2CA	PPP5C	19052	19060	Ppp2ca	Ppp5c	0	1	0	0	1	1	1	1	1	man	0.023019	0.378185	9.1	5.7	0.0456983	7.6	intracellular signaling cascade	intracellular signaling cascade
5515	5536	PPP2CA	PPP5C	19052	19060	Ppp2ca	Ppp5c	0	1	0	0	1	1	1	1	1	man	0.023019	0.378185	9.1	5.7	0.0456983	7.6	tissue development	mitotic cell cycle
5515	5536	PPP2CA	PPP5C	19052	19060	Ppp2ca	Ppp5c	0	1	0	0	1	1	1	1	1	man	0.023019	0.378185	9.1	5.7	0.0456983	7.6	tissue development	intracellular signaling cascade
5515	5536	PPP2CA	PPP5C	19052	19060	Ppp2ca	Ppp5c	0	1	0	0	1	1	1	1	1	man	0.023019	0.378185	9.1	5.7	0.0456983	7.6	cell surface receptor linked signal transduction	mitotic cell cycle
5515	5536	PPP2CA	PPP5C	19052	19060	Ppp2ca	Ppp5c	0	1	0	0	1	1	1	1	1	man	0.023019	0.378185	9.1	5.7	0.0456983	7.6	cell surface receptor linked signal transduction	intracellular signaling cascade
1408	5536	CRY2	PPP5C	12953	19060	Cry2	Ppp5c	0	0	1	1	1	1	1	0	1	unihi	0.0425479	0.378185	9.2	5.7	0.0506507	8.5	circadian rhythm	intracellular signaling cascade
4862	5914	NPAS2	RARA	18143	19401	Npas2	Rara	0	0	1	1	0	1	0	0	0	ext	0	0.329247	0.9	18	0	0.6	circadian rhythm	intracellular signaling cascade
4862	6256	NPAS2	RXRA	18143	20181	Npas2	Rxra	0	0	1	1	0	1	0	0	0	ext	0	0.00211631	0.9	6.9	0	1.6	circadian rhythm	intracellular signaling cascade
4862	8202	NPAS2	NCOA3	18143	17979	Npas2	Ncoa3	0	0	1	1	0	1	0	0	0	ext	0	0.14549	0.9	4.1	0	1.3	circadian rhythm	intracellular signaling cascade
8914	54962	TIMELESS	TIPIN	21853	66131	Timeless	Tipin	0	0	1	1	0	1	0	0	0	ext	0.300916	0.0858411	19.6	4.5	0.576953	0.3	circadian rhythm	intracellular signaling cascade
2932	8553	GSK3B	BHLHE40	56637	20893	Gsk3b	Bhlhb2	1	0	1	0	1	1	1	1	0	y2h	0.0032	0.000859098	3.5	12.4	0.057205	10.3	intracellular signaling cascade	circadian rhythm
5515	8553	PPP2CA	BHLHE40	19052	20893	Ppp2ca	Bhlhb2	1	0	1	0	1	1	1	1	0	y2h	0.023019	0.000859098	9.1	12.4	3.84615e-05	11.9	intracellular signaling cascade	circadian rhythm
5518	8553	PPP2R1A	BHLHE40	51792	20893	Ppp2r1a	Bhlhb2	1	0	1	0	1	1	1	1	0	y2h	0.000944137	0.000859098	3.7	12.4	0.029	10.6	intracellular signaling cascade	circadian rhythm
2932	8864	GSK3B	PER2	56637	18627	Gsk3b	Per2	0	1	0	0	1	1	1	1	0	man	0.0032	0	3.5	20.1	0	13.7	intracellular signaling cascade	circadian rhythm
5578	8864	PRKCA	PER2	18750	18627	Prkca	Per2	0	1	0	0	1	1	1	1	0	man	0.00678513	0	7.5	20.1	0	13.6	intracellular signaling cascade	circadian rhythm
2932	9572	GSK3B	NR1D1	56637	217166	Gsk3b	Nr1d1	0	1	0	0	1	1	1	1	0	man	0.0032	0	3.5	6.8	0	6.3	intracellular signaling cascade	circadian rhythm
8864	8945	PER2	BTRC	18627	12234	Per2	Btrc	0	1	0	0	1	1	1	0	1	man	0	0.0144088	20.1	5.2	0	13.8	circadian rhythm	mitotic cell cycle
8945	23291	BTRC	FBXW11	12234	103583	Btrc	Fbxw11	0	1	1	1	1	1	1	1	1	man	0.0144088	0.00217924	5.2	4.6	9.42029e-05	5	interspecies interaction between organisms	modification-dependent protein catabolic process
8945	23291	BTRC	FBXW11	12234	103583	Btrc	Fbxw11	0	1	1	1	1	1	1	1	1	man	0.0144088	0.00217924	5.2	4.6	9.42029e-05	5	interspecies interaction between organisms	modification-dependent macromolecule catabolic process
8945	23291	BTRC	FBXW11	12234	103583	Btrc	Fbxw11	0	1	1	1	1	1	1	1	1	man	0.0144088	0.00217924	5.2	4.6	9.42029e-05	5	interspecies interaction between organisms	cellular protein catabolic process
8945	23291	BTRC	FBXW11	12234	103583	Btrc	Fbxw11	0	1	1	1	1	1	1	1	1	man	0.0144088	0.00217924	5.2	4.6	9.42029e-05	5	interspecies interaction between organisms	proteolysis involved in cellular protein catabolic process
8945	23291	BTRC	FBXW11	12234	103583	Btrc	Fbxw11	0	1	1	1	1	1	1	1	1	man	0.0144088	0.00217924	5.2	4.6	9.42029e-05	5	interspecies interaction between organisms	cell surface receptor linked signal transduction
8945	23291	BTRC	FBXW11	12234	103583	Btrc	Fbxw11	0	1	1	1	1	1	1	1	1	man	0.0144088	0.00217924	5.2	4.6	9.42029e-05	5	mitotic cell cycle	modification-dependent protein catabolic process
8945	23291	BTRC	FBXW11	12234	103583	Btrc	Fbxw11	0	1	1	1	1	1	1	1	1	man	0.0144088	0.00217924	5.2	4.6	9.42029e-05	5	mitotic cell cycle	modification-dependent macromolecule catabolic process
8945	23291	BTRC	FBXW11	12234	103583	Btrc	Fbxw11	0	1	1	1	1	1	1	1	1	man	0.0144088	0.00217924	5.2	4.6	9.42029e-05	5	mitotic cell cycle	cellular protein catabolic process
8945	23291	BTRC	FBXW11	12234	103583	Btrc	Fbxw11	0	1	1	1	1	1	1	1	1	man	0.0144088	0.00217924	5.2	4.6	9.42029e-05	5	mitotic cell cycle	proteolysis involved in cellular protein catabolic process
8945	23291	BTRC	FBXW11	12234	103583	Btrc	Fbxw11	0	1	1	1	1	1	1	1	1	man	0.0144088	0.00217924	5.2	4.6	9.42029e-05	5	mitotic cell cycle	cell surface receptor linked signal transduction
8945	23291	BTRC	FBXW11	12234	103583	Btrc	Fbxw11	0	1	1	1	1	1	1	1	1	man	0.0144088	0.00217924	5.2	4.6	9.42029e-05	5	positive regulation of molecular function	modification-dependent protein catabolic process
8945	23291	BTRC	FBXW11	12234	103583	Btrc	Fbxw11	0	1	1	1	1	1	1	1	1	man	0.0144088	0.00217924	5.2	4.6	9.42029e-05	5	positive regulation of molecular function	modification-dependent macromolecule catabolic process
8945	23291	BTRC	FBXW11	12234	103583	Btrc	Fbxw11	0	1	1	1	1	1	1	1	1	man	0.0144088	0.00217924	5.2	4.6	9.42029e-05	5	positive regulation of molecular function	cellular protein catabolic process
8945	23291	BTRC	FBXW11	12234	103583	Btrc	Fbxw11	0	1	1	1	1	1	1	1	1	man	0.0144088	0.00217924	5.2	4.6	9.42029e-05	5	positive regulation of molecular function	proteolysis involved in cellular protein catabolic process
8945	23291	BTRC	FBXW11	12234	103583	Btrc	Fbxw11	0	1	1	1	1	1	1	1	1	man	0.0144088	0.00217924	5.2	4.6	9.42029e-05	5	positive regulation of molecular function	cell surface receptor linked signal transduction
8945	23291	BTRC	FBXW11	12234	103583	Btrc	Fbxw11	0	1	1	1	1	1	1	1	1	man	0.0144088	0.00217924	5.2	4.6	9.42029e-05	5	modification-dependent protein catabolic process	modification-dependent protein catabolic process
8945	23291	BTRC	FBXW11	12234	103583	Btrc	Fbxw11	0	1	1	1	1	1	1	1	1	man	0.0144088	0.00217924	5.2	4.6	9.42029e-05	5	modification-dependent protein catabolic process	modification-dependent macromolecule catabolic process
8945	23291	BTRC	FBXW11	12234	103583	Btrc	Fbxw11	0	1	1	1	1	1	1	1	1	man	0.0144088	0.00217924	5.2	4.6	9.42029e-05	5	modification-dependent protein catabolic process	cellular protein catabolic process
8945	23291	BTRC	FBXW11	12234	103583	Btrc	Fbxw11	0	1	1	1	1	1	1	1	1	man	0.0144088	0.00217924	5.2	4.6	9.42029e-05	5	modification-dependent protein catabolic process	proteolysis involved in cellular protein catabolic process
8945	23291	BTRC	FBXW11	12234	103583	Btrc	Fbxw11	0	1	1	1	1	1	1	1	1	man	0.0144088	0.00217924	5.2	4.6	9.42029e-05	5	modification-dependent protein catabolic process	cell surface receptor linked signal transduction
8945	23291	BTRC	FBXW11	12234	103583	Btrc	Fbxw11	0	1	1	1	1	1	1	1	1	man	0.0144088	0.00217924	5.2	4.6	9.42029e-05	5	modification-dependent macromolecule catabolic process	modification-dependent protein catabolic process
8945	23291	BTRC	FBXW11	12234	103583	Btrc	Fbxw11	0	1	1	1	1	1	1	1	1	man	0.0144088	0.00217924	5.2	4.6	9.42029e-05	5	modification-dependent macromolecule catabolic process	modification-dependent macromolecule catabolic process
8945	23291	BTRC	FBXW11	12234	103583	Btrc	Fbxw11	0	1	1	1	1	1	1	1	1	man	0.0144088	0.00217924	5.2	4.6	9.42029e-05	5	modification-dependent macromolecule catabolic process	cellular protein catabolic process
8945	23291	BTRC	FBXW11	12234	103583	Btrc	Fbxw11	0	1	1	1	1	1	1	1	1	man	0.0144088	0.00217924	5.2	4.6	9.42029e-05	5	modification-dependent macromolecule catabolic process	proteolysis involved in cellular protein catabolic process
8945	23291	BTRC	FBXW11	12234	103583	Btrc	Fbxw11	0	1	1	1	1	1	1	1	1	man	0.0144088	0.00217924	5.2	4.6	9.42029e-05	5	modification-dependent macromolecule catabolic process	cell surface receptor linked signal transduction
8945	23291	BTRC	FBXW11	12234	103583	Btrc	Fbxw11	0	1	1	1	1	1	1	1	1	man	0.0144088	0.00217924	5.2	4.6	9.42029e-05	5	cellular protein catabolic process	modification-dependent protein catabolic process
8945	23291	BTRC	FBXW11	12234	103583	Btrc	Fbxw11	0	1	1	1	1	1	1	1	1	man	0.0144088	0.00217924	5.2	4.6	9.42029e-05	5	cellular protein catabolic process	modification-dependent macromolecule catabolic process
8945	23291	BTRC	FBXW11	12234	103583	Btrc	Fbxw11	0	1	1	1	1	1	1	1	1	man	0.0144088	0.00217924	5.2	4.6	9.42029e-05	5	cellular protein catabolic process	cellular protein catabolic process
8945	23291	BTRC	FBXW11	12234	103583	Btrc	Fbxw11	0	1	1	1	1	1	1	1	1	man	0.0144088	0.00217924	5.2	4.6	9.42029e-05	5	cellular protein catabolic process	proteolysis involved in cellular protein catabolic process
8945	23291	BTRC	FBXW11	12234	103583	Btrc	Fbxw11	0	1	1	1	1	1	1	1	1	man	0.0144088	0.00217924	5.2	4.6	9.42029e-05	5	cellular protein catabolic process	cell surface receptor linked signal transduction
8945	23291	BTRC	FBXW11	12234	103583	Btrc	Fbxw11	0	1	1	1	1	1	1	1	1	man	0.0144088	0.00217924	5.2	4.6	9.42029e-05	5	proteolysis involved in cellular protein catabolic process	modification-dependent protein catabolic process
8945	23291	BTRC	FBXW11	12234	103583	Btrc	Fbxw11	0	1	1	1	1	1	1	1	1	man	0.0144088	0.00217924	5.2	4.6	9.42029e-05	5	proteolysis involved in cellular protein catabolic process	modification-dependent macromolecule catabolic process
8945	23291	BTRC	FBXW11	12234	103583	Btrc	Fbxw11	0	1	1	1	1	1	1	1	1	man	0.0144088	0.00217924	5.2	4.6	9.42029e-05	5	proteolysis involved in cellular protein catabolic process	cellular protein catabolic process
8945	23291	BTRC	FBXW11	12234	103583	Btrc	Fbxw11	0	1	1	1	1	1	1	1	1	man	0.0144088	0.00217924	5.2	4.6	9.42029e-05	5	proteolysis involved in cellular protein catabolic process	proteolysis involved in cellular protein catabolic process
8945	23291	BTRC	FBXW11	12234	103583	Btrc	Fbxw11	0	1	1	1	1	1	1	1	1	man	0.0144088	0.00217924	5.2	4.6	9.42029e-05	5	proteolysis involved in cellular protein catabolic process	cell surface receptor linked signal transduction
8945	23291	BTRC	FBXW11	12234	103583	Btrc	Fbxw11	0	1	1	1	1	1	1	1	1	man	0.0144088	0.00217924	5.2	4.6	9.42029e-05	5	cell surface receptor linked signal transduction	modification-dependent protein catabolic process
8945	23291	BTRC	FBXW11	12234	103583	Btrc	Fbxw11	0	1	1	1	1	1	1	1	1	man	0.0144088	0.00217924	5.2	4.6	9.42029e-05	5	cell surface receptor linked signal transduction	modification-dependent macromolecule catabolic process
8945	23291	BTRC	FBXW11	12234	103583	Btrc	Fbxw11	0	1	1	1	1	1	1	1	1	man	0.0144088	0.00217924	5.2	4.6	9.42029e-05	5	cell surface receptor linked signal transduction	cellular protein catabolic process
8945	23291	BTRC	FBXW11	12234	103583	Btrc	Fbxw11	0	1	1	1	1	1	1	1	1	man	0.0144088	0.00217924	5.2	4.6	9.42029e-05	5	cell surface receptor linked signal transduction	proteolysis involved in cellular protein catabolic process
8945	23291	BTRC	FBXW11	12234	103583	Btrc	Fbxw11	0	1	1	1	1	1	1	1	1	man	0.0144088	0.00217924	5.2	4.6	9.42029e-05	5	cell surface receptor linked signal transduction	cell surface receptor linked signal transduction
1407	5536	CRY1	PPP5C	12952	19060	Cry1	Ppp5c	0	1	0	0	1	1	1	0	1	man	0	0.378185	19.8	5.7	0	19.9	circadian rhythm	mitotic cell cycle
1407	8914	CRY1	TIMELESS	12952	21853	Cry1	Timeless	0	0	1	1	1	1	1	0	0	unihi	0	0.300916	19.8	19.6	0	19.8	circadian rhythm	mitotic cell cycle
1408	5536	CRY2	PPP5C	12953	19060	Cry2	Ppp5c	0	0	1	1	1	1	1	0	1	unihi	0.0425479	0.378185	9.2	5.7	0.0506507	8.5	circadian rhythm	mitotic cell cycle
1407	1453	CRY1	CSNK1D	12952	104318	Cry1	Csnk1d	0	1	0	0	1	1	1	0	1	man	0	0.029129	19.8	2.8	0	20.2	DNA repair	DNA repair
1407	1453	CRY1	CSNK1D	12952	104318	Cry1	Csnk1d	0	1	0	0	1	1	1	0	1	man	0	0.029129	19.8	2.8	0	20.2	DNA repair	protein amino acid phosphorylation
1407	1453	CRY1	CSNK1D	12952	104318	Cry1	Csnk1d	0	1	0	0	1	1	1	0	1	man	0	0.029129	19.8	2.8	0	20.2	DNA repair	cell surface receptor linked signal transduction
1408	8914	CRY2	TIMELESS	12953	21853	Cry2	Timeless	0	0	1	1	1	1	1	0	0	unihi	0.0425479	0.300916	9.2	19.6	0.347146	10.3	circadian rhythm	mitotic cell cycle
5187	8914	PER1	TIMELESS	18626	21853	Per1	Timeless	0	0	1	1	1	1	1	0	0	unihi	0	0.300916	17.7	19.6	4.89796e-05	12.4	circadian rhythm	mitotic cell cycle
8864	8914	PER2	TIMELESS	18627	21853	Per2	Timeless	0	0	1	1	1	1	1	0	0	unihi	0	0.300916	20.1	19.6	0	14.4	circadian rhythm	mitotic cell cycle
1408	1453	CRY2	CSNK1D	12953	104318	Cry2	Csnk1d	0	1	0	0	1	1	1	0	1	man	0.0425479	0.029129	9.2	2.8	0.0819775	7.1	DNA repair	DNA repair
1408	1453	CRY2	CSNK1D	12953	104318	Cry2	Csnk1d	0	1	0	0	1	1	1	0	1	man	0.0425479	0.029129	9.2	2.8	0.0819775	7.1	DNA repair	protein amino acid phosphorylation
1408	1453	CRY2	CSNK1D	12953	104318	Cry2	Csnk1d	0	1	0	0	1	1	1	0	1	man	0.0425479	0.029129	9.2	2.8	0.0819775	7.1	DNA repair	cell surface receptor linked signal transduction
1454	5536	CSNK1E	PPP5C	27373	19060	Csnk1e	Ppp5c	0	1	0	0	1	1	1	1	1	man	0.0768418	0.378185	16.6	5.7	0.828649	14.3	DNA repair	mitotic cell cycle
1454	5536	CSNK1E	PPP5C	27373	19060	Csnk1e	Ppp5c	0	1	0	0	1	1	1	1	1	man	0.0768418	0.378185	16.6	5.7	0.828649	14.3	DNA repair	intracellular signaling cascade
1454	5536	CSNK1E	PPP5C	27373	19060	Csnk1e	Ppp5c	0	1	0	0	1	1	1	1	1	man	0.0768418	0.378185	16.6	5.7	0.828649	14.3	protein amino acid phosphorylation	mitotic cell cycle
1454	5536	CSNK1E	PPP5C	27373	19060	Csnk1e	Ppp5c	0	1	0	0	1	1	1	1	1	man	0.0768418	0.378185	16.6	5.7	0.828649	14.3	protein amino acid phosphorylation	intracellular signaling cascade
8914	54962	TIMELESS	TIPIN	21853	66131	Timeless	Tipin	0	0	1	1	0	1	0	0	0	ext	0.300916	0.0858411	19.6	4.5	0.576953	0.3	circadian rhythm	mitotic cell cycle
8553	79176	BHLHE40	FBXL15	20893	68431	Bhlhb2	Fbxl15	1	0	1	0	1	1	1	0	1	y2h	0.000859098	0.0111513	12.4	18.4	0.00113402	13.8	circadian rhythm	modification-dependent macromolecule catabolic process
8864	8945	PER2	BTRC	18627	12234	Per2	Btrc	0	1	0	0	1	1	1	0	1	man	0	0.0144088	20.1	5.2	0	13.8	circadian rhythm	modification-dependent macromolecule catabolic process
1407	26224	CRY1	FBXL3	12952	50789	Cry1	Fbxl3	0	1	0	0	1	1	1	0	1	man	0	0.00326556	19.8	4.7	0	20.1	circadian rhythm	modification-dependent macromolecule catabolic process
1408	26224	CRY2	FBXL3	12953	50789	Cry2	Fbxl3	0	1	0	0	1	1	1	0	1	man	0.0425479	0.00326556	9.2	4.7	0.0099	7.3	circadian rhythm	modification-dependent macromolecule catabolic process
1111	8914	CHEK1	TIMELESS	12649	21853	Chek1	Timeless	0	0	1	1	0	0	1	0	0	ext	0.0379367	0.300916	12	19.6	0.12388	14.8	intracellular signaling cascade	circadian rhythm
1407	8914	CRY1	TIMELESS	12952	21853	Cry1	Timeless	0	0	1	1	1	1	1	0	0	unihi	0	0.300916	19.8	19.6	0	19.8	DNA repair	regulation of cell proliferation
1407	8914	CRY1	TIMELESS	12952	21853	Cry1	Timeless	0	0	1	1	1	1	1	0	0	unihi	0	0.300916	19.8	19.6	0	19.8	DNA repair	organ morphogenesis
1407	8914	CRY1	TIMELESS	12952	21853	Cry1	Timeless	0	0	1	1	1	1	1	0	0	unihi	0	0.300916	19.8	19.6	0	19.8	DNA repair	mitotic cell cycle
1407	8914	CRY1	TIMELESS	12952	21853	Cry1	Timeless	0	0	1	1	1	1	1	0	0	unihi	0	0.300916	19.8	19.6	0	19.8	DNA repair	tissue development
8864	23291	PER2	FBXW11	18627	103583	Per2	Fbxw11	0	1	0	0	1	1	1	0	1	man	0	0.00217924	20.1	4.6	0	13.9	circadian rhythm	modification-dependent macromolecule catabolic process
8553	79176	BHLHE40	FBXL15	20893	68431	Bhlhb2	Fbxl15	1	0	1	0	1	1	1	0	1	y2h	0.000859098	0.0111513	12.4	18.4	0.00113402	13.8	circadian rhythm	modification-dependent protein catabolic process
1408	5536	CRY2	PPP5C	12953	19060	Cry2	Ppp5c	0	0	1	1	1	1	1	0	1	unihi	0.0425479	0.378185	9.2	5.7	0.0506507	8.5	DNA repair	mitotic cell cycle
1408	5536	CRY2	PPP5C	12953	19060	Cry2	Ppp5c	0	0	1	1	1	1	1	0	1	unihi	0.0425479	0.378185	9.2	5.7	0.0506507	8.5	DNA repair	intracellular signaling cascade
8864	8945	PER2	BTRC	18627	12234	Per2	Btrc	0	1	0	0	1	1	1	0	1	man	0	0.0144088	20.1	5.2	0	13.8	circadian rhythm	modification-dependent protein catabolic process
1407	26224	CRY1	FBXL3	12952	50789	Cry1	Fbxl3	0	1	0	0	1	1	1	0	1	man	0	0.00326556	19.8	4.7	0	20.1	circadian rhythm	modification-dependent protein catabolic process
1408	26224	CRY2	FBXL3	12953	50789	Cry2	Fbxl3	0	1	0	0	1	1	1	0	1	man	0.0425479	0.00326556	9.2	4.7	0.0099	7.3	circadian rhythm	modification-dependent protein catabolic process
8864	23291	PER2	FBXW11	18627	103583	Per2	Fbxw11	0	1	0	0	1	1	1	0	1	man	0	0.00217924	20.1	4.6	0	13.9	circadian rhythm	modification-dependent protein catabolic process
1408	2932	CRY2	GSK3B	12953	56637	Cry2	Gsk3b	0	1	0	0	1	1	1	0	1	man	0.0425479	0.0032	9.2	3.5	0.0327913	6.3	circadian rhythm	negative regulation of developmental process
6774	8553	STAT3	BHLHE40	20848	20893	Stat3	Bhlhb2	0	0	1	1	0	0	1	0	0	ext	0.00255469	0.000859098	3.2	12.4	0.177285	9.1	intracellular signaling cascade	circadian rhythm
1408	8914	CRY2	TIMELESS	12953	21853	Cry2	Timeless	0	0	1	1	1	1	1	0	0	unihi	0.0425479	0.300916	9.2	19.6	0.347146	10.3	DNA repair	regulation of cell proliferation
1408	8914	CRY2	TIMELESS	12953	21853	Cry2	Timeless	0	0	1	1	1	1	1	0	0	unihi	0.0425479	0.300916	9.2	19.6	0.347146	10.3	DNA repair	organ morphogenesis
1408	8914	CRY2	TIMELESS	12953	21853	Cry2	Timeless	0	0	1	1	1	1	1	0	0	unihi	0.0425479	0.300916	9.2	19.6	0.347146	10.3	DNA repair	mitotic cell cycle
1408	8914	CRY2	TIMELESS	12953	21853	Cry2	Timeless	0	0	1	1	1	1	1	0	0	unihi	0.0425479	0.300916	9.2	19.6	0.347146	10.3	DNA repair	tissue development
1111	8914	CHEK1	TIMELESS	12649	21853	Chek1	Timeless	0	0	1	1	0	0	1	0	0	ext	0.0379367	0.300916	12	19.6	0.12388	14.8	mitotic cell cycle	circadian rhythm
1453	5187	CSNK1D	PER1	104318	18626	Csnk1d	Per1	0	0	1	1	1	1	1	1	0	unihi	0.029129	0	2.8	17.7	0.000747899	10.8	DNA repair	response to external stimulus
7329	8553	UBE2I	BHLHE40	22196	20893	Ube2i	Bhlhb2	0	0	1	1	0	0	1	0	0	ext	0.000613374	0.000859098	5.1	12.4	0.00408706	10.8	mitotic cell cycle	circadian rhythm
1453	5187	CSNK1D	PER1	104318	18626	Csnk1d	Per1	0	0	1	1	1	1	1	1	0	unihi	0.029129	0	2.8	17.7	0.000747899	10.8	protein amino acid phosphorylation	response to external stimulus
7329	8553	UBE2I	BHLHE40	22196	20893	Ube2i	Bhlhb2	0	0	1	1	0	0	1	0	0	ext	0.000613374	0.000859098	5.1	12.4	0.00408706	10.8	modification-dependent macromolecule catabolic process	circadian rhythm
1453	5187	CSNK1D	PER1	104318	18626	Csnk1d	Per1	0	0	1	1	1	1	1	1	0	unihi	0.029129	0	2.8	17.7	0.000747899	10.8	cell surface receptor linked signal transduction	response to external stimulus
1457	1457	CSNK2A1	CSNK2A1	12995	12995	Csnk2a1	Csnk2a1	0	0	1	1	1	1	1	1	1	unihi	0.000167929	0.000167929	6.5	6.5	3.09735e-05	6.5	protein amino acid phosphorylation	protein amino acid phosphorylation
1457	1457	CSNK2A1	CSNK2A1	12995	12995	Csnk2a1	Csnk2a1	0	0	1	1	1	1	1	1	1	unihi	0.000167929	0.000167929	6.5	6.5	3.09735e-05	6.5	protein amino acid phosphorylation	cell surface receptor linked signal transduction
1457	1457	CSNK2A1	CSNK2A1	12995	12995	Csnk2a1	Csnk2a1	0	0	1	1	1	1	1	1	1	unihi	0.000167929	0.000167929	6.5	6.5	3.09735e-05	6.5	cell surface receptor linked signal transduction	protein amino acid phosphorylation
1457	1457	CSNK2A1	CSNK2A1	12995	12995	Csnk2a1	Csnk2a1	0	0	1	1	1	1	1	1	1	unihi	0.000167929	0.000167929	6.5	6.5	3.09735e-05	6.5	cell surface receptor linked signal transduction	cell surface receptor linked signal transduction
2932	5566	GSK3B	PRKACA	56637	18747	Gsk3b	Prkaca	0	0	1	1	1	1	1	1	1	unihi	0.0032	0.00144846	3.5	2.8	0.000114583	3.2	organ morphogenesis	response to organic substance
2932	5566	GSK3B	PRKACA	56637	18747	Gsk3b	Prkaca	0	0	1	1	1	1	1	1	1	unihi	0.0032	0.00144846	3.5	2.8	0.000114583	3.2	organ morphogenesis	organ morphogenesis
2932	5566	GSK3B	PRKACA	56637	18747	Gsk3b	Prkaca	0	0	1	1	1	1	1	1	1	unihi	0.0032	0.00144846	3.5	2.8	0.000114583	3.2	organ morphogenesis	embryonic development
2932	5566	GSK3B	PRKACA	56637	18747	Gsk3b	Prkaca	0	0	1	1	1	1	1	1	1	unihi	0.0032	0.00144846	3.5	2.8	0.000114583	3.2	organ morphogenesis	protein amino acid phosphorylation
2932	5566	GSK3B	PRKACA	56637	18747	Gsk3b	Prkaca	0	0	1	1	1	1	1	1	1	unihi	0.0032	0.00144846	3.5	2.8	0.000114583	3.2	organ morphogenesis	intracellular signaling cascade
2932	5566	GSK3B	PRKACA	56637	18747	Gsk3b	Prkaca	0	0	1	1	1	1	1	1	1	unihi	0.0032	0.00144846	3.5	2.8	0.000114583	3.2	organ morphogenesis	tissue development
2932	5566	GSK3B	PRKACA	56637	18747	Gsk3b	Prkaca	0	0	1	1	1	1	1	1	1	unihi	0.0032	0.00144846	3.5	2.8	0.000114583	3.2	organ morphogenesis	anatomical structure formation
2932	5566	GSK3B	PRKACA	56637	18747	Gsk3b	Prkaca	0	0	1	1	1	1	1	1	1	unihi	0.0032	0.00144846	3.5	2.8	0.000114583	3.2	protein amino acid phosphorylation	response to organic substance
2932	5566	GSK3B	PRKACA	56637	18747	Gsk3b	Prkaca	0	0	1	1	1	1	1	1	1	unihi	0.0032	0.00144846	3.5	2.8	0.000114583	3.2	protein amino acid phosphorylation	organ morphogenesis
2932	5566	GSK3B	PRKACA	56637	18747	Gsk3b	Prkaca	0	0	1	1	1	1	1	1	1	unihi	0.0032	0.00144846	3.5	2.8	0.000114583	3.2	protein amino acid phosphorylation	embryonic development
2932	5566	GSK3B	PRKACA	56637	18747	Gsk3b	Prkaca	0	0	1	1	1	1	1	1	1	unihi	0.0032	0.00144846	3.5	2.8	0.000114583	3.2	protein amino acid phosphorylation	protein amino acid phosphorylation
2932	5566	GSK3B	PRKACA	56637	18747	Gsk3b	Prkaca	0	0	1	1	1	1	1	1	1	unihi	0.0032	0.00144846	3.5	2.8	0.000114583	3.2	protein amino acid phosphorylation	intracellular signaling cascade
2932	5566	GSK3B	PRKACA	56637	18747	Gsk3b	Prkaca	0	0	1	1	1	1	1	1	1	unihi	0.0032	0.00144846	3.5	2.8	0.000114583	3.2	protein amino acid phosphorylation	tissue development
2932	5566	GSK3B	PRKACA	56637	18747	Gsk3b	Prkaca	0	0	1	1	1	1	1	1	1	unihi	0.0032	0.00144846	3.5	2.8	0.000114583	3.2	protein amino acid phosphorylation	anatomical structure formation
2932	5566	GSK3B	PRKACA	56637	18747	Gsk3b	Prkaca	0	0	1	1	1	1	1	1	1	unihi	0.0032	0.00144846	3.5	2.8	0.000114583	3.2	intracellular signaling cascade	response to organic substance
2932	5566	GSK3B	PRKACA	56637	18747	Gsk3b	Prkaca	0	0	1	1	1	1	1	1	1	unihi	0.0032	0.00144846	3.5	2.8	0.000114583	3.2	intracellular signaling cascade	organ morphogenesis
2932	5566	GSK3B	PRKACA	56637	18747	Gsk3b	Prkaca	0	0	1	1	1	1	1	1	1	unihi	0.0032	0.00144846	3.5	2.8	0.000114583	3.2	intracellular signaling cascade	embryonic development
2932	5566	GSK3B	PRKACA	56637	18747	Gsk3b	Prkaca	0	0	1	1	1	1	1	1	1	unihi	0.0032	0.00144846	3.5	2.8	0.000114583	3.2	intracellular signaling cascade	protein amino acid phosphorylation
2932	5566	GSK3B	PRKACA	56637	18747	Gsk3b	Prkaca	0	0	1	1	1	1	1	1	1	unihi	0.0032	0.00144846	3.5	2.8	0.000114583	3.2	intracellular signaling cascade	intracellular signaling cascade
2932	5566	GSK3B	PRKACA	56637	18747	Gsk3b	Prkaca	0	0	1	1	1	1	1	1	1	unihi	0.0032	0.00144846	3.5	2.8	0.000114583	3.2	intracellular signaling cascade	tissue development
2932	5566	GSK3B	PRKACA	56637	18747	Gsk3b	Prkaca	0	0	1	1	1	1	1	1	1	unihi	0.0032	0.00144846	3.5	2.8	0.000114583	3.2	intracellular signaling cascade	anatomical structure formation
2932	5566	GSK3B	PRKACA	56637	18747	Gsk3b	Prkaca	0	0	1	1	1	1	1	1	1	unihi	0.0032	0.00144846	3.5	2.8	0.000114583	3.2	negative regulation of developmental process	response to organic substance
2932	5566	GSK3B	PRKACA	56637	18747	Gsk3b	Prkaca	0	0	1	1	1	1	1	1	1	unihi	0.0032	0.00144846	3.5	2.8	0.000114583	3.2	negative regulation of developmental process	organ morphogenesis
2932	5566	GSK3B	PRKACA	56637	18747	Gsk3b	Prkaca	0	0	1	1	1	1	1	1	1	unihi	0.0032	0.00144846	3.5	2.8	0.000114583	3.2	negative regulation of developmental process	embryonic development
2932	5566	GSK3B	PRKACA	56637	18747	Gsk3b	Prkaca	0	0	1	1	1	1	1	1	1	unihi	0.0032	0.00144846	3.5	2.8	0.000114583	3.2	negative regulation of developmental process	protein amino acid phosphorylation
2932	5566	GSK3B	PRKACA	56637	18747	Gsk3b	Prkaca	0	0	1	1	1	1	1	1	1	unihi	0.0032	0.00144846	3.5	2.8	0.000114583	3.2	negative regulation of developmental process	intracellular signaling cascade
2932	5566	GSK3B	PRKACA	56637	18747	Gsk3b	Prkaca	0	0	1	1	1	1	1	1	1	unihi	0.0032	0.00144846	3.5	2.8	0.000114583	3.2	negative regulation of developmental process	tissue development
2932	5566	GSK3B	PRKACA	56637	18747	Gsk3b	Prkaca	0	0	1	1	1	1	1	1	1	unihi	0.0032	0.00144846	3.5	2.8	0.000114583	3.2	negative regulation of developmental process	anatomical structure formation
2932	5566	GSK3B	PRKACA	56637	18747	Gsk3b	Prkaca	0	0	1	1	1	1	1	1	1	unihi	0.0032	0.00144846	3.5	2.8	0.000114583	3.2	cell surface receptor linked signal transduction	response to organic substance
2932	5566	GSK3B	PRKACA	56637	18747	Gsk3b	Prkaca	0	0	1	1	1	1	1	1	1	unihi	0.0032	0.00144846	3.5	2.8	0.000114583	3.2	cell surface receptor linked signal transduction	organ morphogenesis
2932	5566	GSK3B	PRKACA	56637	18747	Gsk3b	Prkaca	0	0	1	1	1	1	1	1	1	unihi	0.0032	0.00144846	3.5	2.8	0.000114583	3.2	cell surface receptor linked signal transduction	embryonic development
2932	5566	GSK3B	PRKACA	56637	18747	Gsk3b	Prkaca	0	0	1	1	1	1	1	1	1	unihi	0.0032	0.00144846	3.5	2.8	0.000114583	3.2	cell surface receptor linked signal transduction	protein amino acid phosphorylation
2932	5566	GSK3B	PRKACA	56637	18747	Gsk3b	Prkaca	0	0	1	1	1	1	1	1	1	unihi	0.0032	0.00144846	3.5	2.8	0.000114583	3.2	cell surface receptor linked signal transduction	intracellular signaling cascade
2932	5566	GSK3B	PRKACA	56637	18747	Gsk3b	Prkaca	0	0	1	1	1	1	1	1	1	unihi	0.0032	0.00144846	3.5	2.8	0.000114583	3.2	cell surface receptor linked signal transduction	tissue development
2932	5566	GSK3B	PRKACA	56637	18747	Gsk3b	Prkaca	0	0	1	1	1	1	1	1	1	unihi	0.0032	0.00144846	3.5	2.8	0.000114583	3.2	cell surface receptor linked signal transduction	anatomical structure formation
2932	5566	GSK3B	PRKACA	56637	18747	Gsk3b	Prkaca	0	0	1	1	1	1	1	1	1	unihi	0.0032	0.00144846	3.5	2.8	0.000114583	3.2	anatomical structure formation	response to organic substance
2932	5566	GSK3B	PRKACA	56637	18747	Gsk3b	Prkaca	0	0	1	1	1	1	1	1	1	unihi	0.0032	0.00144846	3.5	2.8	0.000114583	3.2	anatomical structure formation	organ morphogenesis
2932	5566	GSK3B	PRKACA	56637	18747	Gsk3b	Prkaca	0	0	1	1	1	1	1	1	1	unihi	0.0032	0.00144846	3.5	2.8	0.000114583	3.2	anatomical structure formation	embryonic development
2932	5566	GSK3B	PRKACA	56637	18747	Gsk3b	Prkaca	0	0	1	1	1	1	1	1	1	unihi	0.0032	0.00144846	3.5	2.8	0.000114583	3.2	anatomical structure formation	protein amino acid phosphorylation
2932	5566	GSK3B	PRKACA	56637	18747	Gsk3b	Prkaca	0	0	1	1	1	1	1	1	1	unihi	0.0032	0.00144846	3.5	2.8	0.000114583	3.2	anatomical structure formation	intracellular signaling cascade
2932	5566	GSK3B	PRKACA	56637	18747	Gsk3b	Prkaca	0	0	1	1	1	1	1	1	1	unihi	0.0032	0.00144846	3.5	2.8	0.000114583	3.2	anatomical structure formation	tissue development
2932	5566	GSK3B	PRKACA	56637	18747	Gsk3b	Prkaca	0	0	1	1	1	1	1	1	1	unihi	0.0032	0.00144846	3.5	2.8	0.000114583	3.2	anatomical structure formation	anatomical structure formation
2932	2932	GSK3B	GSK3B	56637	56637	Gsk3b	Gsk3b	0	0	1	1	1	1	1	1	1	unihi	0.0032	0.0032	3.5	3.5	0.000721127	3.5	organ morphogenesis	organ morphogenesis
2932	2932	GSK3B	GSK3B	56637	56637	Gsk3b	Gsk3b	0	0	1	1	1	1	1	1	1	unihi	0.0032	0.0032	3.5	3.5	0.000721127	3.5	organ morphogenesis	protein amino acid phosphorylation
2932	2932	GSK3B	GSK3B	56637	56637	Gsk3b	Gsk3b	0	0	1	1	1	1	1	1	1	unihi	0.0032	0.0032	3.5	3.5	0.000721127	3.5	organ morphogenesis	intracellular signaling cascade
2932	2932	GSK3B	GSK3B	56637	56637	Gsk3b	Gsk3b	0	0	1	1	1	1	1	1	1	unihi	0.0032	0.0032	3.5	3.5	0.000721127	3.5	organ morphogenesis	negative regulation of developmental process
2932	2932	GSK3B	GSK3B	56637	56637	Gsk3b	Gsk3b	0	0	1	1	1	1	1	1	1	unihi	0.0032	0.0032	3.5	3.5	0.000721127	3.5	organ morphogenesis	cell surface receptor linked signal transduction
2932	2932	GSK3B	GSK3B	56637	56637	Gsk3b	Gsk3b	0	0	1	1	1	1	1	1	1	unihi	0.0032	0.0032	3.5	3.5	0.000721127	3.5	organ morphogenesis	anatomical structure formation
2932	2932	GSK3B	GSK3B	56637	56637	Gsk3b	Gsk3b	0	0	1	1	1	1	1	1	1	unihi	0.0032	0.0032	3.5	3.5	0.000721127	3.5	protein amino acid phosphorylation	organ morphogenesis
2932	2932	GSK3B	GSK3B	56637	56637	Gsk3b	Gsk3b	0	0	1	1	1	1	1	1	1	unihi	0.0032	0.0032	3.5	3.5	0.000721127	3.5	protein amino acid phosphorylation	protein amino acid phosphorylation
2932	2932	GSK3B	GSK3B	56637	56637	Gsk3b	Gsk3b	0	0	1	1	1	1	1	1	1	unihi	0.0032	0.0032	3.5	3.5	0.000721127	3.5	protein amino acid phosphorylation	intracellular signaling cascade
2932	2932	GSK3B	GSK3B	56637	56637	Gsk3b	Gsk3b	0	0	1	1	1	1	1	1	1	unihi	0.0032	0.0032	3.5	3.5	0.000721127	3.5	protein amino acid phosphorylation	negative regulation of developmental process
2932	2932	GSK3B	GSK3B	56637	56637	Gsk3b	Gsk3b	0	0	1	1	1	1	1	1	1	unihi	0.0032	0.0032	3.5	3.5	0.000721127	3.5	protein amino acid phosphorylation	cell surface receptor linked signal transduction
2932	2932	GSK3B	GSK3B	56637	56637	Gsk3b	Gsk3b	0	0	1	1	1	1	1	1	1	unihi	0.0032	0.0032	3.5	3.5	0.000721127	3.5	protein amino acid phosphorylation	anatomical structure formation
2932	2932	GSK3B	GSK3B	56637	56637	Gsk3b	Gsk3b	0	0	1	1	1	1	1	1	1	unihi	0.0032	0.0032	3.5	3.5	0.000721127	3.5	intracellular signaling cascade	organ morphogenesis
2932	2932	GSK3B	GSK3B	56637	56637	Gsk3b	Gsk3b	0	0	1	1	1	1	1	1	1	unihi	0.0032	0.0032	3.5	3.5	0.000721127	3.5	intracellular signaling cascade	protein amino acid phosphorylation
2932	2932	GSK3B	GSK3B	56637	56637	Gsk3b	Gsk3b	0	0	1	1	1	1	1	1	1	unihi	0.0032	0.0032	3.5	3.5	0.000721127	3.5	intracellular signaling cascade	intracellular signaling cascade
2932	2932	GSK3B	GSK3B	56637	56637	Gsk3b	Gsk3b	0	0	1	1	1	1	1	1	1	unihi	0.0032	0.0032	3.5	3.5	0.000721127	3.5	intracellular signaling cascade	negative regulation of developmental process
2932	2932	GSK3B	GSK3B	56637	56637	Gsk3b	Gsk3b	0	0	1	1	1	1	1	1	1	unihi	0.0032	0.0032	3.5	3.5	0.000721127	3.5	intracellular signaling cascade	cell surface receptor linked signal transduction
2932	2932	GSK3B	GSK3B	56637	56637	Gsk3b	Gsk3b	0	0	1	1	1	1	1	1	1	unihi	0.0032	0.0032	3.5	3.5	0.000721127	3.5	intracellular signaling cascade	anatomical structure formation
2932	2932	GSK3B	GSK3B	56637	56637	Gsk3b	Gsk3b	0	0	1	1	1	1	1	1	1	unihi	0.0032	0.0032	3.5	3.5	0.000721127	3.5	negative regulation of developmental process	organ morphogenesis
2932	2932	GSK3B	GSK3B	56637	56637	Gsk3b	Gsk3b	0	0	1	1	1	1	1	1	1	unihi	0.0032	0.0032	3.5	3.5	0.000721127	3.5	negative regulation of developmental process	protein amino acid phosphorylation
2932	2932	GSK3B	GSK3B	56637	56637	Gsk3b	Gsk3b	0	0	1	1	1	1	1	1	1	unihi	0.0032	0.0032	3.5	3.5	0.000721127	3.5	negative regulation of developmental process	intracellular signaling cascade
2932	2932	GSK3B	GSK3B	56637	56637	Gsk3b	Gsk3b	0	0	1	1	1	1	1	1	1	unihi	0.0032	0.0032	3.5	3.5	0.000721127	3.5	negative regulation of developmental process	negative regulation of developmental process
2932	2932	GSK3B	GSK3B	56637	56637	Gsk3b	Gsk3b	0	0	1	1	1	1	1	1	1	unihi	0.0032	0.0032	3.5	3.5	0.000721127	3.5	negative regulation of developmental process	cell surface receptor linked signal transduction
2932	2932	GSK3B	GSK3B	56637	56637	Gsk3b	Gsk3b	0	0	1	1	1	1	1	1	1	unihi	0.0032	0.0032	3.5	3.5	0.000721127	3.5	negative regulation of developmental process	anatomical structure formation
2932	2932	GSK3B	GSK3B	56637	56637	Gsk3b	Gsk3b	0	0	1	1	1	1	1	1	1	unihi	0.0032	0.0032	3.5	3.5	0.000721127	3.5	cell surface receptor linked signal transduction	organ morphogenesis
2932	2932	GSK3B	GSK3B	56637	56637	Gsk3b	Gsk3b	0	0	1	1	1	1	1	1	1	unihi	0.0032	0.0032	3.5	3.5	0.000721127	3.5	cell surface receptor linked signal transduction	protein amino acid phosphorylation
2932	2932	GSK3B	GSK3B	56637	56637	Gsk3b	Gsk3b	0	0	1	1	1	1	1	1	1	unihi	0.0032	0.0032	3.5	3.5	0.000721127	3.5	cell surface receptor linked signal transduction	intracellular signaling cascade
2932	2932	GSK3B	GSK3B	56637	56637	Gsk3b	Gsk3b	0	0	1	1	1	1	1	1	1	unihi	0.0032	0.0032	3.5	3.5	0.000721127	3.5	cell surface receptor linked signal transduction	negative regulation of developmental process
2932	2932	GSK3B	GSK3B	56637	56637	Gsk3b	Gsk3b	0	0	1	1	1	1	1	1	1	unihi	0.0032	0.0032	3.5	3.5	0.000721127	3.5	cell surface receptor linked signal transduction	cell surface receptor linked signal transduction
2932	2932	GSK3B	GSK3B	56637	56637	Gsk3b	Gsk3b	0	0	1	1	1	1	1	1	1	unihi	0.0032	0.0032	3.5	3.5	0.000721127	3.5	cell surface receptor linked signal transduction	anatomical structure formation
2932	2932	GSK3B	GSK3B	56637	56637	Gsk3b	Gsk3b	0	0	1	1	1	1	1	1	1	unihi	0.0032	0.0032	3.5	3.5	0.000721127	3.5	anatomical structure formation	organ morphogenesis
2932	2932	GSK3B	GSK3B	56637	56637	Gsk3b	Gsk3b	0	0	1	1	1	1	1	1	1	unihi	0.0032	0.0032	3.5	3.5	0.000721127	3.5	anatomical structure formation	protein amino acid phosphorylation
2932	2932	GSK3B	GSK3B	56637	56637	Gsk3b	Gsk3b	0	0	1	1	1	1	1	1	1	unihi	0.0032	0.0032	3.5	3.5	0.000721127	3.5	anatomical structure formation	intracellular signaling cascade
2932	2932	GSK3B	GSK3B	56637	56637	Gsk3b	Gsk3b	0	0	1	1	1	1	1	1	1	unihi	0.0032	0.0032	3.5	3.5	0.000721127	3.5	anatomical structure formation	negative regulation of developmental process
2932	2932	GSK3B	GSK3B	56637	56637	Gsk3b	Gsk3b	0	0	1	1	1	1	1	1	1	unihi	0.0032	0.0032	3.5	3.5	0.000721127	3.5	anatomical structure formation	cell surface receptor linked signal transduction
2932	2932	GSK3B	GSK3B	56637	56637	Gsk3b	Gsk3b	0	0	1	1	1	1	1	1	1	unihi	0.0032	0.0032	3.5	3.5	0.000721127	3.5	anatomical structure formation	anatomical structure formation
4862	5914	NPAS2	RARA	18143	19401	Npas2	Rara	0	0	1	1	0	1	0	0	0	ext	0	0.329247	0.9	18	0	0.6	circadian rhythm	negative regulation of developmental process
9572	9611	NR1D1	NCOR1	217166	20185	Nr1d1	Ncor1	0	0	1	1	0	1	0	0	0	ext	0	0.000292467	6.8	3.1	0	6.4	circadian rhythm	negative regulation of transcription from RNA polymerase II promoter
9572	9612	NR1D1	NCOR2	217166	20602	Nr1d1	Ncor2	0	0	1	1	0	1	0	0	0	ext	0	0.2914	6.8	5.6	0	6.6	circadian rhythm	negative regulation of transcription from RNA polymerase II promoter
1407	79365	CRY1	BHLHE41	12952	79362	Cry1	Bhlhb3	1	0	1	0	1	1	1	0	0	y2h	0	0.0861876	19.8	15.2	0	19.6	circadian rhythm	organ morphogenesis
1408	79365	CRY2	BHLHE41	12953	79362	Cry2	Bhlhb3	1	0	1	0	1	1	1	0	0	y2h	0.0425479	0.0861876	9.2	15.2	0.00558891	10.9	circadian rhythm	organ morphogenesis
7329	8553	UBE2I	BHLHE40	22196	20893	Ube2i	Bhlhb2	0	0	1	1	0	0	1	0	0	ext	0.000613374	0.000859098	5.1	12.4	0.00408706	10.8	modification-dependent protein catabolic process	circadian rhythm
5187	8914	PER1	TIMELESS	18626	21853	Per1	Timeless	0	0	1	1	1	1	1	0	0	unihi	0	0.300916	17.7	19.6	4.89796e-05	12.4	response to external stimulus	regulation of cell proliferation
5187	8914	PER1	TIMELESS	18626	21853	Per1	Timeless	0	0	1	1	1	1	1	0	0	unihi	0	0.300916	17.7	19.6	4.89796e-05	12.4	response to external stimulus	organ morphogenesis
5187	8914	PER1	TIMELESS	18626	21853	Per1	Timeless	0	0	1	1	1	1	1	0	0	unihi	0	0.300916	17.7	19.6	4.89796e-05	12.4	response to external stimulus	mitotic cell cycle
5187	8914	PER1	TIMELESS	18626	21853	Per1	Timeless	0	0	1	1	1	1	1	0	0	unihi	0	0.300916	17.7	19.6	4.89796e-05	12.4	response to external stimulus	tissue development
5515	5518	PPP2CA	PPP2R1A	19052	51792	Ppp2ca	Ppp2r1a	0	0	1	1	1	1	1	1	1	unihi	0.023019	0.000944137	9.1	3.7	0.000978947	5.1	response to organic substance	response to organic substance
5515	5518	PPP2CA	PPP2R1A	19052	51792	Ppp2ca	Ppp2r1a	0	0	1	1	1	1	1	1	1	unihi	0.023019	0.000944137	9.1	3.7	0.000978947	5.1	response to organic substance	protein amino acid phosphorylation
5515	5518	PPP2CA	PPP2R1A	19052	51792	Ppp2ca	Ppp2r1a	0	0	1	1	1	1	1	1	1	unihi	0.023019	0.000944137	9.1	3.7	0.000978947	5.1	response to organic substance	intracellular signaling cascade
5515	5518	PPP2CA	PPP2R1A	19052	51792	Ppp2ca	Ppp2r1a	0	0	1	1	1	1	1	1	1	unihi	0.023019	0.000944137	9.1	3.7	0.000978947	5.1	response to organic substance	cell surface receptor linked signal transduction
5515	5518	PPP2CA	PPP2R1A	19052	51792	Ppp2ca	Ppp2r1a	0	0	1	1	1	1	1	1	1	unihi	0.023019	0.000944137	9.1	3.7	0.000978947	5.1	response to organic substance	anatomical structure formation
5515	5518	PPP2CA	PPP2R1A	19052	51792	Ppp2ca	Ppp2r1a	0	0	1	1	1	1	1	1	1	unihi	0.023019	0.000944137	9.1	3.7	0.000978947	5.1	protein amino acid phosphorylation	response to organic substance
5515	5518	PPP2CA	PPP2R1A	19052	51792	Ppp2ca	Ppp2r1a	0	0	1	1	1	1	1	1	1	unihi	0.023019	0.000944137	9.1	3.7	0.000978947	5.1	protein amino acid phosphorylation	protein amino acid phosphorylation
5515	5518	PPP2CA	PPP2R1A	19052	51792	Ppp2ca	Ppp2r1a	0	0	1	1	1	1	1	1	1	unihi	0.023019	0.000944137	9.1	3.7	0.000978947	5.1	protein amino acid phosphorylation	intracellular signaling cascade
5515	5518	PPP2CA	PPP2R1A	19052	51792	Ppp2ca	Ppp2r1a	0	0	1	1	1	1	1	1	1	unihi	0.023019	0.000944137	9.1	3.7	0.000978947	5.1	protein amino acid phosphorylation	cell surface receptor linked signal transduction
5515	5518	PPP2CA	PPP2R1A	19052	51792	Ppp2ca	Ppp2r1a	0	0	1	1	1	1	1	1	1	unihi	0.023019	0.000944137	9.1	3.7	0.000978947	5.1	protein amino acid phosphorylation	anatomical structure formation
5515	5518	PPP2CA	PPP2R1A	19052	51792	Ppp2ca	Ppp2r1a	0	0	1	1	1	1	1	1	1	unihi	0.023019	0.000944137	9.1	3.7	0.000978947	5.1	intracellular signaling cascade	response to organic substance
5515	5518	PPP2CA	PPP2R1A	19052	51792	Ppp2ca	Ppp2r1a	0	0	1	1	1	1	1	1	1	unihi	0.023019	0.000944137	9.1	3.7	0.000978947	5.1	intracellular signaling cascade	protein amino acid phosphorylation
5515	5518	PPP2CA	PPP2R1A	19052	51792	Ppp2ca	Ppp2r1a	0	0	1	1	1	1	1	1	1	unihi	0.023019	0.000944137	9.1	3.7	0.000978947	5.1	intracellular signaling cascade	intracellular signaling cascade
5515	5518	PPP2CA	PPP2R1A	19052	51792	Ppp2ca	Ppp2r1a	0	0	1	1	1	1	1	1	1	unihi	0.023019	0.000944137	9.1	3.7	0.000978947	5.1	intracellular signaling cascade	cell surface receptor linked signal transduction
5515	5518	PPP2CA	PPP2R1A	19052	51792	Ppp2ca	Ppp2r1a	0	0	1	1	1	1	1	1	1	unihi	0.023019	0.000944137	9.1	3.7	0.000978947	5.1	intracellular signaling cascade	anatomical structure formation
5515	5518	PPP2CA	PPP2R1A	19052	51792	Ppp2ca	Ppp2r1a	0	0	1	1	1	1	1	1	1	unihi	0.023019	0.000944137	9.1	3.7	0.000978947	5.1	tissue development	response to organic substance
5515	5518	PPP2CA	PPP2R1A	19052	51792	Ppp2ca	Ppp2r1a	0	0	1	1	1	1	1	1	1	unihi	0.023019	0.000944137	9.1	3.7	0.000978947	5.1	tissue development	protein amino acid phosphorylation
5515	5518	PPP2CA	PPP2R1A	19052	51792	Ppp2ca	Ppp2r1a	0	0	1	1	1	1	1	1	1	unihi	0.023019	0.000944137	9.1	3.7	0.000978947	5.1	tissue development	intracellular signaling cascade
5515	5518	PPP2CA	PPP2R1A	19052	51792	Ppp2ca	Ppp2r1a	0	0	1	1	1	1	1	1	1	unihi	0.023019	0.000944137	9.1	3.7	0.000978947	5.1	tissue development	cell surface receptor linked signal transduction
5515	5518	PPP2CA	PPP2R1A	19052	51792	Ppp2ca	Ppp2r1a	0	0	1	1	1	1	1	1	1	unihi	0.023019	0.000944137	9.1	3.7	0.000978947	5.1	tissue development	anatomical structure formation
5515	5518	PPP2CA	PPP2R1A	19052	51792	Ppp2ca	Ppp2r1a	0	0	1	1	1	1	1	1	1	unihi	0.023019	0.000944137	9.1	3.7	0.000978947	5.1	cell surface receptor linked signal transduction	response to organic substance
5515	5518	PPP2CA	PPP2R1A	19052	51792	Ppp2ca	Ppp2r1a	0	0	1	1	1	1	1	1	1	unihi	0.023019	0.000944137	9.1	3.7	0.000978947	5.1	cell surface receptor linked signal transduction	protein amino acid phosphorylation
5515	5518	PPP2CA	PPP2R1A	19052	51792	Ppp2ca	Ppp2r1a	0	0	1	1	1	1	1	1	1	unihi	0.023019	0.000944137	9.1	3.7	0.000978947	5.1	cell surface receptor linked signal transduction	intracellular signaling cascade
5515	5518	PPP2CA	PPP2R1A	19052	51792	Ppp2ca	Ppp2r1a	0	0	1	1	1	1	1	1	1	unihi	0.023019	0.000944137	9.1	3.7	0.000978947	5.1	cell surface receptor linked signal transduction	cell surface receptor linked signal transduction
5515	5518	PPP2CA	PPP2R1A	19052	51792	Ppp2ca	Ppp2r1a	0	0	1	1	1	1	1	1	1	unihi	0.023019	0.000944137	9.1	3.7	0.000978947	5.1	cell surface receptor linked signal transduction	anatomical structure formation
5518	5536	PPP2R1A	PPP5C	51792	19060	Ppp2r1a	Ppp5c	0	0	1	1	1	1	1	1	1	unihi	0.000944137	0.378185	3.7	5.7	0.00966071	4.2	response to organic substance	mitotic cell cycle
5518	5536	PPP2R1A	PPP5C	51792	19060	Ppp2r1a	Ppp5c	0	0	1	1	1	1	1	1	1	unihi	0.000944137	0.378185	3.7	5.7	0.00966071	4.2	response to organic substance	intracellular signaling cascade
5518	5536	PPP2R1A	PPP5C	51792	19060	Ppp2r1a	Ppp5c	0	0	1	1	1	1	1	1	1	unihi	0.000944137	0.378185	3.7	5.7	0.00966071	4.2	protein amino acid phosphorylation	mitotic cell cycle
5518	5536	PPP2R1A	PPP5C	51792	19060	Ppp2r1a	Ppp5c	0	0	1	1	1	1	1	1	1	unihi	0.000944137	0.378185	3.7	5.7	0.00966071	4.2	protein amino acid phosphorylation	intracellular signaling cascade
5518	5536	PPP2R1A	PPP5C	51792	19060	Ppp2r1a	Ppp5c	0	0	1	1	1	1	1	1	1	unihi	0.000944137	0.378185	3.7	5.7	0.00966071	4.2	intracellular signaling cascade	mitotic cell cycle
5518	5536	PPP2R1A	PPP5C	51792	19060	Ppp2r1a	Ppp5c	0	0	1	1	1	1	1	1	1	unihi	0.000944137	0.378185	3.7	5.7	0.00966071	4.2	intracellular signaling cascade	intracellular signaling cascade
5518	5536	PPP2R1A	PPP5C	51792	19060	Ppp2r1a	Ppp5c	0	0	1	1	1	1	1	1	1	unihi	0.000944137	0.378185	3.7	5.7	0.00966071	4.2	cell surface receptor linked signal transduction	mitotic cell cycle
5518	5536	PPP2R1A	PPP5C	51792	19060	Ppp2r1a	Ppp5c	0	0	1	1	1	1	1	1	1	unihi	0.000944137	0.378185	3.7	5.7	0.00966071	4.2	cell surface receptor linked signal transduction	intracellular signaling cascade
5518	5536	PPP2R1A	PPP5C	51792	19060	Ppp2r1a	Ppp5c	0	0	1	1	1	1	1	1	1	unihi	0.000944137	0.378185	3.7	5.7	0.00966071	4.2	anatomical structure formation	mitotic cell cycle
5518	5536	PPP2R1A	PPP5C	51792	19060	Ppp2r1a	Ppp5c	0	0	1	1	1	1	1	1	1	unihi	0.000944137	0.378185	3.7	5.7	0.00966071	4.2	anatomical structure formation	intracellular signaling cascade
5536	5536	PPP5C	PPP5C	19060	19060	Ppp5c	Ppp5c	0	0	1	1	1	1	1	1	1	unihi	0.378185	0.378185	5.7	5.7	0.2775	5.8	mitotic cell cycle	mitotic cell cycle
5536	5536	PPP5C	PPP5C	19060	19060	Ppp5c	Ppp5c	0	0	1	1	1	1	1	1	1	unihi	0.378185	0.378185	5.7	5.7	0.2775	5.8	mitotic cell cycle	intracellular signaling cascade
5536	5536	PPP5C	PPP5C	19060	19060	Ppp5c	Ppp5c	0	0	1	1	1	1	1	1	1	unihi	0.378185	0.378185	5.7	5.7	0.2775	5.8	intracellular signaling cascade	mitotic cell cycle
5536	5536	PPP5C	PPP5C	19060	19060	Ppp5c	Ppp5c	0	0	1	1	1	1	1	1	1	unihi	0.378185	0.378185	5.7	5.7	0.2775	5.8	intracellular signaling cascade	intracellular signaling cascade
5578	5578	PRKCA	PRKCA	18750	18750	Prkca	Prkca	0	0	1	1	1	1	1	1	1	unihi	0.00678513	0.00678513	7.5	7.5	0.00171212	7.5	regulation of cell proliferation	regulation of cell proliferation
5578	5578	PRKCA	PRKCA	18750	18750	Prkca	Prkca	0	0	1	1	1	1	1	1	1	unihi	0.00678513	0.00678513	7.5	7.5	0.00171212	7.5	regulation of cell proliferation	response to organic substance
5578	5578	PRKCA	PRKCA	18750	18750	Prkca	Prkca	0	0	1	1	1	1	1	1	1	unihi	0.00678513	0.00678513	7.5	7.5	0.00171212	7.5	regulation of cell proliferation	homeostatic process
5578	5578	PRKCA	PRKCA	18750	18750	Prkca	Prkca	0	0	1	1	1	1	1	1	1	unihi	0.00678513	0.00678513	7.5	7.5	0.00171212	7.5	regulation of cell proliferation	protein amino acid phosphorylation
5578	5578	PRKCA	PRKCA	18750	18750	Prkca	Prkca	0	0	1	1	1	1	1	1	1	unihi	0.00678513	0.00678513	7.5	7.5	0.00171212	7.5	regulation of cell proliferation	intracellular signaling cascade
5578	5578	PRKCA	PRKCA	18750	18750	Prkca	Prkca	0	0	1	1	1	1	1	1	1	unihi	0.00678513	0.00678513	7.5	7.5	0.00171212	7.5	regulation of cell proliferation	tissue development
5578	5578	PRKCA	PRKCA	18750	18750	Prkca	Prkca	0	0	1	1	1	1	1	1	1	unihi	0.00678513	0.00678513	7.5	7.5	0.00171212	7.5	regulation of cell proliferation	response to external stimulus
5578	5578	PRKCA	PRKCA	18750	18750	Prkca	Prkca	0	0	1	1	1	1	1	1	1	unihi	0.00678513	0.00678513	7.5	7.5	0.00171212	7.5	regulation of cell proliferation	cell surface receptor linked signal transduction
5578	5578	PRKCA	PRKCA	18750	18750	Prkca	Prkca	0	0	1	1	1	1	1	1	1	unihi	0.00678513	0.00678513	7.5	7.5	0.00171212	7.5	response to organic substance	regulation of cell proliferation
5578	5578	PRKCA	PRKCA	18750	18750	Prkca	Prkca	0	0	1	1	1	1	1	1	1	unihi	0.00678513	0.00678513	7.5	7.5	0.00171212	7.5	response to organic substance	response to organic substance
5578	5578	PRKCA	PRKCA	18750	18750	Prkca	Prkca	0	0	1	1	1	1	1	1	1	unihi	0.00678513	0.00678513	7.5	7.5	0.00171212	7.5	response to organic substance	homeostatic process
5578	5578	PRKCA	PRKCA	18750	18750	Prkca	Prkca	0	0	1	1	1	1	1	1	1	unihi	0.00678513	0.00678513	7.5	7.5	0.00171212	7.5	response to organic substance	protein amino acid phosphorylation
5578	5578	PRKCA	PRKCA	18750	18750	Prkca	Prkca	0	0	1	1	1	1	1	1	1	unihi	0.00678513	0.00678513	7.5	7.5	0.00171212	7.5	response to organic substance	intracellular signaling cascade
5578	5578	PRKCA	PRKCA	18750	18750	Prkca	Prkca	0	0	1	1	1	1	1	1	1	unihi	0.00678513	0.00678513	7.5	7.5	0.00171212	7.5	response to organic substance	tissue development
5578	5578	PRKCA	PRKCA	18750	18750	Prkca	Prkca	0	0	1	1	1	1	1	1	1	unihi	0.00678513	0.00678513	7.5	7.5	0.00171212	7.5	response to organic substance	response to external stimulus
5578	5578	PRKCA	PRKCA	18750	18750	Prkca	Prkca	0	0	1	1	1	1	1	1	1	unihi	0.00678513	0.00678513	7.5	7.5	0.00171212	7.5	response to organic substance	cell surface receptor linked signal transduction
5578	5578	PRKCA	PRKCA	18750	18750	Prkca	Prkca	0	0	1	1	1	1	1	1	1	unihi	0.00678513	0.00678513	7.5	7.5	0.00171212	7.5	homeostatic process	regulation of cell proliferation
5578	5578	PRKCA	PRKCA	18750	18750	Prkca	Prkca	0	0	1	1	1	1	1	1	1	unihi	0.00678513	0.00678513	7.5	7.5	0.00171212	7.5	homeostatic process	response to organic substance
5578	5578	PRKCA	PRKCA	18750	18750	Prkca	Prkca	0	0	1	1	1	1	1	1	1	unihi	0.00678513	0.00678513	7.5	7.5	0.00171212	7.5	homeostatic process	homeostatic process
5578	5578	PRKCA	PRKCA	18750	18750	Prkca	Prkca	0	0	1	1	1	1	1	1	1	unihi	0.00678513	0.00678513	7.5	7.5	0.00171212	7.5	homeostatic process	protein amino acid phosphorylation
5578	5578	PRKCA	PRKCA	18750	18750	Prkca	Prkca	0	0	1	1	1	1	1	1	1	unihi	0.00678513	0.00678513	7.5	7.5	0.00171212	7.5	homeostatic process	intracellular signaling cascade
5578	5578	PRKCA	PRKCA	18750	18750	Prkca	Prkca	0	0	1	1	1	1	1	1	1	unihi	0.00678513	0.00678513	7.5	7.5	0.00171212	7.5	homeostatic process	tissue development
5578	5578	PRKCA	PRKCA	18750	18750	Prkca	Prkca	0	0	1	1	1	1	1	1	1	unihi	0.00678513	0.00678513	7.5	7.5	0.00171212	7.5	homeostatic process	response to external stimulus
5578	5578	PRKCA	PRKCA	18750	18750	Prkca	Prkca	0	0	1	1	1	1	1	1	1	unihi	0.00678513	0.00678513	7.5	7.5	0.00171212	7.5	homeostatic process	cell surface receptor linked signal transduction
5578	5578	PRKCA	PRKCA	18750	18750	Prkca	Prkca	0	0	1	1	1	1	1	1	1	unihi	0.00678513	0.00678513	7.5	7.5	0.00171212	7.5	protein amino acid phosphorylation	regulation of cell proliferation
5578	5578	PRKCA	PRKCA	18750	18750	Prkca	Prkca	0	0	1	1	1	1	1	1	1	unihi	0.00678513	0.00678513	7.5	7.5	0.00171212	7.5	protein amino acid phosphorylation	response to organic substance
5578	5578	PRKCA	PRKCA	18750	18750	Prkca	Prkca	0	0	1	1	1	1	1	1	1	unihi	0.00678513	0.00678513	7.5	7.5	0.00171212	7.5	protein amino acid phosphorylation	homeostatic process
5578	5578	PRKCA	PRKCA	18750	18750	Prkca	Prkca	0	0	1	1	1	1	1	1	1	unihi	0.00678513	0.00678513	7.5	7.5	0.00171212	7.5	protein amino acid phosphorylation	protein amino acid phosphorylation
5578	5578	PRKCA	PRKCA	18750	18750	Prkca	Prkca	0	0	1	1	1	1	1	1	1	unihi	0.00678513	0.00678513	7.5	7.5	0.00171212	7.5	protein amino acid phosphorylation	intracellular signaling cascade
5578	5578	PRKCA	PRKCA	18750	18750	Prkca	Prkca	0	0	1	1	1	1	1	1	1	unihi	0.00678513	0.00678513	7.5	7.5	0.00171212	7.5	protein amino acid phosphorylation	tissue development
5578	5578	PRKCA	PRKCA	18750	18750	Prkca	Prkca	0	0	1	1	1	1	1	1	1	unihi	0.00678513	0.00678513	7.5	7.5	0.00171212	7.5	protein amino acid phosphorylation	response to external stimulus
5578	5578	PRKCA	PRKCA	18750	18750	Prkca	Prkca	0	0	1	1	1	1	1	1	1	unihi	0.00678513	0.00678513	7.5	7.5	0.00171212	7.5	protein amino acid phosphorylation	cell surface receptor linked signal transduction
5578	5578	PRKCA	PRKCA	18750	18750	Prkca	Prkca	0	0	1	1	1	1	1	1	1	unihi	0.00678513	0.00678513	7.5	7.5	0.00171212	7.5	intracellular signaling cascade	regulation of cell proliferation
5578	5578	PRKCA	PRKCA	18750	18750	Prkca	Prkca	0	0	1	1	1	1	1	1	1	unihi	0.00678513	0.00678513	7.5	7.5	0.00171212	7.5	intracellular signaling cascade	response to organic substance
5578	5578	PRKCA	PRKCA	18750	18750	Prkca	Prkca	0	0	1	1	1	1	1	1	1	unihi	0.00678513	0.00678513	7.5	7.5	0.00171212	7.5	intracellular signaling cascade	homeostatic process
5578	5578	PRKCA	PRKCA	18750	18750	Prkca	Prkca	0	0	1	1	1	1	1	1	1	unihi	0.00678513	0.00678513	7.5	7.5	0.00171212	7.5	intracellular signaling cascade	protein amino acid phosphorylation
5578	5578	PRKCA	PRKCA	18750	18750	Prkca	Prkca	0	0	1	1	1	1	1	1	1	unihi	0.00678513	0.00678513	7.5	7.5	0.00171212	7.5	intracellular signaling cascade	intracellular signaling cascade
5578	5578	PRKCA	PRKCA	18750	18750	Prkca	Prkca	0	0	1	1	1	1	1	1	1	unihi	0.00678513	0.00678513	7.5	7.5	0.00171212	7.5	intracellular signaling cascade	tissue development
5578	5578	PRKCA	PRKCA	18750	18750	Prkca	Prkca	0	0	1	1	1	1	1	1	1	unihi	0.00678513	0.00678513	7.5	7.5	0.00171212	7.5	intracellular signaling cascade	response to external stimulus
5578	5578	PRKCA	PRKCA	18750	18750	Prkca	Prkca	0	0	1	1	1	1	1	1	1	unihi	0.00678513	0.00678513	7.5	7.5	0.00171212	7.5	intracellular signaling cascade	cell surface receptor linked signal transduction
5578	5578	PRKCA	PRKCA	18750	18750	Prkca	Prkca	0	0	1	1	1	1	1	1	1	unihi	0.00678513	0.00678513	7.5	7.5	0.00171212	7.5	tissue development	regulation of cell proliferation
5578	5578	PRKCA	PRKCA	18750	18750	Prkca	Prkca	0	0	1	1	1	1	1	1	1	unihi	0.00678513	0.00678513	7.5	7.5	0.00171212	7.5	tissue development	response to organic substance
5578	5578	PRKCA	PRKCA	18750	18750	Prkca	Prkca	0	0	1	1	1	1	1	1	1	unihi	0.00678513	0.00678513	7.5	7.5	0.00171212	7.5	tissue development	homeostatic process
5578	5578	PRKCA	PRKCA	18750	18750	Prkca	Prkca	0	0	1	1	1	1	1	1	1	unihi	0.00678513	0.00678513	7.5	7.5	0.00171212	7.5	tissue development	protein amino acid phosphorylation
5578	5578	PRKCA	PRKCA	18750	18750	Prkca	Prkca	0	0	1	1	1	1	1	1	1	unihi	0.00678513	0.00678513	7.5	7.5	0.00171212	7.5	tissue development	intracellular signaling cascade
5578	5578	PRKCA	PRKCA	18750	18750	Prkca	Prkca	0	0	1	1	1	1	1	1	1	unihi	0.00678513	0.00678513	7.5	7.5	0.00171212	7.5	tissue development	tissue development
5578	5578	PRKCA	PRKCA	18750	18750	Prkca	Prkca	0	0	1	1	1	1	1	1	1	unihi	0.00678513	0.00678513	7.5	7.5	0.00171212	7.5	tissue development	response to external stimulus
5578	5578	PRKCA	PRKCA	18750	18750	Prkca	Prkca	0	0	1	1	1	1	1	1	1	unihi	0.00678513	0.00678513	7.5	7.5	0.00171212	7.5	tissue development	cell surface receptor linked signal transduction
5578	5578	PRKCA	PRKCA	18750	18750	Prkca	Prkca	0	0	1	1	1	1	1	1	1	unihi	0.00678513	0.00678513	7.5	7.5	0.00171212	7.5	response to external stimulus	regulation of cell proliferation
5578	5578	PRKCA	PRKCA	18750	18750	Prkca	Prkca	0	0	1	1	1	1	1	1	1	unihi	0.00678513	0.00678513	7.5	7.5	0.00171212	7.5	response to external stimulus	response to organic substance
5578	5578	PRKCA	PRKCA	18750	18750	Prkca	Prkca	0	0	1	1	1	1	1	1	1	unihi	0.00678513	0.00678513	7.5	7.5	0.00171212	7.5	response to external stimulus	homeostatic process
5578	5578	PRKCA	PRKCA	18750	18750	Prkca	Prkca	0	0	1	1	1	1	1	1	1	unihi	0.00678513	0.00678513	7.5	7.5	0.00171212	7.5	response to external stimulus	protein amino acid phosphorylation
5578	5578	PRKCA	PRKCA	18750	18750	Prkca	Prkca	0	0	1	1	1	1	1	1	1	unihi	0.00678513	0.00678513	7.5	7.5	0.00171212	7.5	response to external stimulus	intracellular signaling cascade
5578	5578	PRKCA	PRKCA	18750	18750	Prkca	Prkca	0	0	1	1	1	1	1	1	1	unihi	0.00678513	0.00678513	7.5	7.5	0.00171212	7.5	response to external stimulus	tissue development
5578	5578	PRKCA	PRKCA	18750	18750	Prkca	Prkca	0	0	1	1	1	1	1	1	1	unihi	0.00678513	0.00678513	7.5	7.5	0.00171212	7.5	response to external stimulus	response to external stimulus
5578	5578	PRKCA	PRKCA	18750	18750	Prkca	Prkca	0	0	1	1	1	1	1	1	1	unihi	0.00678513	0.00678513	7.5	7.5	0.00171212	7.5	response to external stimulus	cell surface receptor linked signal transduction
5578	5578	PRKCA	PRKCA	18750	18750	Prkca	Prkca	0	0	1	1	1	1	1	1	1	unihi	0.00678513	0.00678513	7.5	7.5	0.00171212	7.5	cell surface receptor linked signal transduction	regulation of cell proliferation
5578	5578	PRKCA	PRKCA	18750	18750	Prkca	Prkca	0	0	1	1	1	1	1	1	1	unihi	0.00678513	0.00678513	7.5	7.5	0.00171212	7.5	cell surface receptor linked signal transduction	response to organic substance
5578	5578	PRKCA	PRKCA	18750	18750	Prkca	Prkca	0	0	1	1	1	1	1	1	1	unihi	0.00678513	0.00678513	7.5	7.5	0.00171212	7.5	cell surface receptor linked signal transduction	homeostatic process
5578	5578	PRKCA	PRKCA	18750	18750	Prkca	Prkca	0	0	1	1	1	1	1	1	1	unihi	0.00678513	0.00678513	7.5	7.5	0.00171212	7.5	cell surface receptor linked signal transduction	protein amino acid phosphorylation
5578	5578	PRKCA	PRKCA	18750	18750	Prkca	Prkca	0	0	1	1	1	1	1	1	1	unihi	0.00678513	0.00678513	7.5	7.5	0.00171212	7.5	cell surface receptor linked signal transduction	intracellular signaling cascade
5578	5578	PRKCA	PRKCA	18750	18750	Prkca	Prkca	0	0	1	1	1	1	1	1	1	unihi	0.00678513	0.00678513	7.5	7.5	0.00171212	7.5	cell surface receptor linked signal transduction	tissue development
5578	5578	PRKCA	PRKCA	18750	18750	Prkca	Prkca	0	0	1	1	1	1	1	1	1	unihi	0.00678513	0.00678513	7.5	7.5	0.00171212	7.5	cell surface receptor linked signal transduction	response to external stimulus
5578	5578	PRKCA	PRKCA	18750	18750	Prkca	Prkca	0	0	1	1	1	1	1	1	1	unihi	0.00678513	0.00678513	7.5	7.5	0.00171212	7.5	cell surface receptor linked signal transduction	cell surface receptor linked signal transduction
6095	6095	RORA	RORA	19883	19883	Rora	Rora	0	0	1	1	1	1	1	0	0	unihi	3.89273e-05	3.89273e-05	21.9	21.9	4.87805e-06	21.9	positive regulation of transcription from RNA polymerase II promoter	positive regulation of transcription from RNA polymerase II promoter
6095	6095	RORA	RORA	19883	19883	Rora	Rora	0	0	1	1	1	1	1	0	0	unihi	3.89273e-05	3.89273e-05	21.9	21.9	4.87805e-06	21.9	positive regulation of transcription from RNA polymerase II promoter	anatomical structure formation
6095	6095	RORA	RORA	19883	19883	Rora	Rora	0	0	1	1	1	1	1	0	0	unihi	3.89273e-05	3.89273e-05	21.9	21.9	4.87805e-06	21.9	anatomical structure formation	positive regulation of transcription from RNA polymerase II promoter
6095	6095	RORA	RORA	19883	19883	Rora	Rora	0	0	1	1	1	1	1	0	0	unihi	3.89273e-05	3.89273e-05	21.9	21.9	4.87805e-06	21.9	anatomical structure formation	anatomical structure formation
8553	79365	BHLHE40	BHLHE41	20893	79362	Bhlhb2	Bhlhb3	1	0	1	1	1	1	1	0	0	unihi.y2h	0.000859098	0.0861876	12.4	15.2	3.04348e-05	12.9	circadian rhythm	organ morphogenesis
8864	79365	PER2	BHLHE41	18627	79362	Per2	Bhlhb3	1	0	1	0	1	1	1	0	0	y2h	0	0.0861876	20.1	15.2	0	14.1	circadian rhythm	organ morphogenesis
9575	79365	CLOCK	BHLHE41	12753	79362	Clock	Bhlhb3	1	0	1	0	1	1	1	0	0	y2h	0	0.0861876	23	15.2	0	22.4	circadian rhythm	organ morphogenesis
1408	2932	CRY2	GSK3B	12953	56637	Cry2	Gsk3b	0	1	0	0	1	1	1	0	1	man	0.0425479	0.0032	9.2	3.5	0.0327913	6.3	circadian rhythm	organ morphogenesis
406	79365	ARNTL	BHLHE41	11865	79362	Arntl	Bhlhb3	0	1	0	0	1	1	1	0	0	man	0	0.0861876	22.4	15.2	0	22.1	circadian rhythm	organ morphogenesis
8945	8945	BTRC	BTRC	12234	12234	Btrc	Btrc	0	0	1	1	1	1	1	1	1	unihi	0.0144088	0.0144088	5.2	5.2	0.00369359	5.3	interspecies interaction between organisms	interspecies interaction between organisms
8945	8945	BTRC	BTRC	12234	12234	Btrc	Btrc	0	0	1	1	1	1	1	1	1	unihi	0.0144088	0.0144088	5.2	5.2	0.00369359	5.3	interspecies interaction between organisms	mitotic cell cycle
8945	8945	BTRC	BTRC	12234	12234	Btrc	Btrc	0	0	1	1	1	1	1	1	1	unihi	0.0144088	0.0144088	5.2	5.2	0.00369359	5.3	interspecies interaction between organisms	positive regulation of molecular function
8945	8945	BTRC	BTRC	12234	12234	Btrc	Btrc	0	0	1	1	1	1	1	1	1	unihi	0.0144088	0.0144088	5.2	5.2	0.00369359	5.3	interspecies interaction between organisms	modification-dependent protein catabolic process
8945	8945	BTRC	BTRC	12234	12234	Btrc	Btrc	0	0	1	1	1	1	1	1	1	unihi	0.0144088	0.0144088	5.2	5.2	0.00369359	5.3	interspecies interaction between organisms	modification-dependent macromolecule catabolic process
8945	8945	BTRC	BTRC	12234	12234	Btrc	Btrc	0	0	1	1	1	1	1	1	1	unihi	0.0144088	0.0144088	5.2	5.2	0.00369359	5.3	interspecies interaction between organisms	cellular protein catabolic process
8945	8945	BTRC	BTRC	12234	12234	Btrc	Btrc	0	0	1	1	1	1	1	1	1	unihi	0.0144088	0.0144088	5.2	5.2	0.00369359	5.3	interspecies interaction between organisms	proteolysis involved in cellular protein catabolic process
8945	8945	BTRC	BTRC	12234	12234	Btrc	Btrc	0	0	1	1	1	1	1	1	1	unihi	0.0144088	0.0144088	5.2	5.2	0.00369359	5.3	interspecies interaction between organisms	cell surface receptor linked signal transduction
8945	8945	BTRC	BTRC	12234	12234	Btrc	Btrc	0	0	1	1	1	1	1	1	1	unihi	0.0144088	0.0144088	5.2	5.2	0.00369359	5.3	mitotic cell cycle	interspecies interaction between organisms
8945	8945	BTRC	BTRC	12234	12234	Btrc	Btrc	0	0	1	1	1	1	1	1	1	unihi	0.0144088	0.0144088	5.2	5.2	0.00369359	5.3	mitotic cell cycle	mitotic cell cycle
8945	8945	BTRC	BTRC	12234	12234	Btrc	Btrc	0	0	1	1	1	1	1	1	1	unihi	0.0144088	0.0144088	5.2	5.2	0.00369359	5.3	mitotic cell cycle	positive regulation of molecular function
8945	8945	BTRC	BTRC	12234	12234	Btrc	Btrc	0	0	1	1	1	1	1	1	1	unihi	0.0144088	0.0144088	5.2	5.2	0.00369359	5.3	mitotic cell cycle	modification-dependent protein catabolic process
8945	8945	BTRC	BTRC	12234	12234	Btrc	Btrc	0	0	1	1	1	1	1	1	1	unihi	0.0144088	0.0144088	5.2	5.2	0.00369359	5.3	mitotic cell cycle	modification-dependent macromolecule catabolic process
8945	8945	BTRC	BTRC	12234	12234	Btrc	Btrc	0	0	1	1	1	1	1	1	1	unihi	0.0144088	0.0144088	5.2	5.2	0.00369359	5.3	mitotic cell cycle	cellular protein catabolic process
8945	8945	BTRC	BTRC	12234	12234	Btrc	Btrc	0	0	1	1	1	1	1	1	1	unihi	0.0144088	0.0144088	5.2	5.2	0.00369359	5.3	mitotic cell cycle	proteolysis involved in cellular protein catabolic process
8945	8945	BTRC	BTRC	12234	12234	Btrc	Btrc	0	0	1	1	1	1	1	1	1	unihi	0.0144088	0.0144088	5.2	5.2	0.00369359	5.3	mitotic cell cycle	cell surface receptor linked signal transduction
8945	8945	BTRC	BTRC	12234	12234	Btrc	Btrc	0	0	1	1	1	1	1	1	1	unihi	0.0144088	0.0144088	5.2	5.2	0.00369359	5.3	positive regulation of molecular function	interspecies interaction between organisms
8945	8945	BTRC	BTRC	12234	12234	Btrc	Btrc	0	0	1	1	1	1	1	1	1	unihi	0.0144088	0.0144088	5.2	5.2	0.00369359	5.3	positive regulation of molecular function	mitotic cell cycle
8945	8945	BTRC	BTRC	12234	12234	Btrc	Btrc	0	0	1	1	1	1	1	1	1	unihi	0.0144088	0.0144088	5.2	5.2	0.00369359	5.3	positive regulation of molecular function	positive regulation of molecular function
8945	8945	BTRC	BTRC	12234	12234	Btrc	Btrc	0	0	1	1	1	1	1	1	1	unihi	0.0144088	0.0144088	5.2	5.2	0.00369359	5.3	positive regulation of molecular function	modification-dependent protein catabolic process
8945	8945	BTRC	BTRC	12234	12234	Btrc	Btrc	0	0	1	1	1	1	1	1	1	unihi	0.0144088	0.0144088	5.2	5.2	0.00369359	5.3	positive regulation of molecular function	modification-dependent macromolecule catabolic process
8945	8945	BTRC	BTRC	12234	12234	Btrc	Btrc	0	0	1	1	1	1	1	1	1	unihi	0.0144088	0.0144088	5.2	5.2	0.00369359	5.3	positive regulation of molecular function	cellular protein catabolic process
8945	8945	BTRC	BTRC	12234	12234	Btrc	Btrc	0	0	1	1	1	1	1	1	1	unihi	0.0144088	0.0144088	5.2	5.2	0.00369359	5.3	positive regulation of molecular function	proteolysis involved in cellular protein catabolic process
8945	8945	BTRC	BTRC	12234	12234	Btrc	Btrc	0	0	1	1	1	1	1	1	1	unihi	0.0144088	0.0144088	5.2	5.2	0.00369359	5.3	positive regulation of molecular function	cell surface receptor linked signal transduction
8945	8945	BTRC	BTRC	12234	12234	Btrc	Btrc	0	0	1	1	1	1	1	1	1	unihi	0.0144088	0.0144088	5.2	5.2	0.00369359	5.3	modification-dependent protein catabolic process	interspecies interaction between organisms
8945	8945	BTRC	BTRC	12234	12234	Btrc	Btrc	0	0	1	1	1	1	1	1	1	unihi	0.0144088	0.0144088	5.2	5.2	0.00369359	5.3	modification-dependent protein catabolic process	mitotic cell cycle
8945	8945	BTRC	BTRC	12234	12234	Btrc	Btrc	0	0	1	1	1	1	1	1	1	unihi	0.0144088	0.0144088	5.2	5.2	0.00369359	5.3	modification-dependent protein catabolic process	positive regulation of molecular function
8945	8945	BTRC	BTRC	12234	12234	Btrc	Btrc	0	0	1	1	1	1	1	1	1	unihi	0.0144088	0.0144088	5.2	5.2	0.00369359	5.3	modification-dependent protein catabolic process	modification-dependent protein catabolic process
8945	8945	BTRC	BTRC	12234	12234	Btrc	Btrc	0	0	1	1	1	1	1	1	1	unihi	0.0144088	0.0144088	5.2	5.2	0.00369359	5.3	modification-dependent protein catabolic process	modification-dependent macromolecule catabolic process
8945	8945	BTRC	BTRC	12234	12234	Btrc	Btrc	0	0	1	1	1	1	1	1	1	unihi	0.0144088	0.0144088	5.2	5.2	0.00369359	5.3	modification-dependent protein catabolic process	cellular protein catabolic process
8945	8945	BTRC	BTRC	12234	12234	Btrc	Btrc	0	0	1	1	1	1	1	1	1	unihi	0.0144088	0.0144088	5.2	5.2	0.00369359	5.3	modification-dependent protein catabolic process	proteolysis involved in cellular protein catabolic process
8945	8945	BTRC	BTRC	12234	12234	Btrc	Btrc	0	0	1	1	1	1	1	1	1	unihi	0.0144088	0.0144088	5.2	5.2	0.00369359	5.3	modification-dependent protein catabolic process	cell surface receptor linked signal transduction
8945	8945	BTRC	BTRC	12234	12234	Btrc	Btrc	0	0	1	1	1	1	1	1	1	unihi	0.0144088	0.0144088	5.2	5.2	0.00369359	5.3	modification-dependent macromolecule catabolic process	interspecies interaction between organisms
8945	8945	BTRC	BTRC	12234	12234	Btrc	Btrc	0	0	1	1	1	1	1	1	1	unihi	0.0144088	0.0144088	5.2	5.2	0.00369359	5.3	modification-dependent macromolecule catabolic process	mitotic cell cycle
8945	8945	BTRC	BTRC	12234	12234	Btrc	Btrc	0	0	1	1	1	1	1	1	1	unihi	0.0144088	0.0144088	5.2	5.2	0.00369359	5.3	modification-dependent macromolecule catabolic process	positive regulation of molecular function
8945	8945	BTRC	BTRC	12234	12234	Btrc	Btrc	0	0	1	1	1	1	1	1	1	unihi	0.0144088	0.0144088	5.2	5.2	0.00369359	5.3	modification-dependent macromolecule catabolic process	modification-dependent protein catabolic process
8945	8945	BTRC	BTRC	12234	12234	Btrc	Btrc	0	0	1	1	1	1	1	1	1	unihi	0.0144088	0.0144088	5.2	5.2	0.00369359	5.3	modification-dependent macromolecule catabolic process	modification-dependent macromolecule catabolic process
8945	8945	BTRC	BTRC	12234	12234	Btrc	Btrc	0	0	1	1	1	1	1	1	1	unihi	0.0144088	0.0144088	5.2	5.2	0.00369359	5.3	modification-dependent macromolecule catabolic process	cellular protein catabolic process
8945	8945	BTRC	BTRC	12234	12234	Btrc	Btrc	0	0	1	1	1	1	1	1	1	unihi	0.0144088	0.0144088	5.2	5.2	0.00369359	5.3	modification-dependent macromolecule catabolic process	proteolysis involved in cellular protein catabolic process
8945	8945	BTRC	BTRC	12234	12234	Btrc	Btrc	0	0	1	1	1	1	1	1	1	unihi	0.0144088	0.0144088	5.2	5.2	0.00369359	5.3	modification-dependent macromolecule catabolic process	cell surface receptor linked signal transduction
8945	8945	BTRC	BTRC	12234	12234	Btrc	Btrc	0	0	1	1	1	1	1	1	1	unihi	0.0144088	0.0144088	5.2	5.2	0.00369359	5.3	cellular protein catabolic process	interspecies interaction between organisms
8945	8945	BTRC	BTRC	12234	12234	Btrc	Btrc	0	0	1	1	1	1	1	1	1	unihi	0.0144088	0.0144088	5.2	5.2	0.00369359	5.3	cellular protein catabolic process	mitotic cell cycle
8945	8945	BTRC	BTRC	12234	12234	Btrc	Btrc	0	0	1	1	1	1	1	1	1	unihi	0.0144088	0.0144088	5.2	5.2	0.00369359	5.3	cellular protein catabolic process	positive regulation of molecular function
8945	8945	BTRC	BTRC	12234	12234	Btrc	Btrc	0	0	1	1	1	1	1	1	1	unihi	0.0144088	0.0144088	5.2	5.2	0.00369359	5.3	cellular protein catabolic process	modification-dependent protein catabolic process
8945	8945	BTRC	BTRC	12234	12234	Btrc	Btrc	0	0	1	1	1	1	1	1	1	unihi	0.0144088	0.0144088	5.2	5.2	0.00369359	5.3	cellular protein catabolic process	modification-dependent macromolecule catabolic process
8945	8945	BTRC	BTRC	12234	12234	Btrc	Btrc	0	0	1	1	1	1	1	1	1	unihi	0.0144088	0.0144088	5.2	5.2	0.00369359	5.3	cellular protein catabolic process	cellular protein catabolic process
8945	8945	BTRC	BTRC	12234	12234	Btrc	Btrc	0	0	1	1	1	1	1	1	1	unihi	0.0144088	0.0144088	5.2	5.2	0.00369359	5.3	cellular protein catabolic process	proteolysis involved in cellular protein catabolic process
8945	8945	BTRC	BTRC	12234	12234	Btrc	Btrc	0	0	1	1	1	1	1	1	1	unihi	0.0144088	0.0144088	5.2	5.2	0.00369359	5.3	cellular protein catabolic process	cell surface receptor linked signal transduction
8945	8945	BTRC	BTRC	12234	12234	Btrc	Btrc	0	0	1	1	1	1	1	1	1	unihi	0.0144088	0.0144088	5.2	5.2	0.00369359	5.3	proteolysis involved in cellular protein catabolic process	interspecies interaction between organisms
8945	8945	BTRC	BTRC	12234	12234	Btrc	Btrc	0	0	1	1	1	1	1	1	1	unihi	0.0144088	0.0144088	5.2	5.2	0.00369359	5.3	proteolysis involved in cellular protein catabolic process	mitotic cell cycle
8945	8945	BTRC	BTRC	12234	12234	Btrc	Btrc	0	0	1	1	1	1	1	1	1	unihi	0.0144088	0.0144088	5.2	5.2	0.00369359	5.3	proteolysis involved in cellular protein catabolic process	positive regulation of molecular function
8945	8945	BTRC	BTRC	12234	12234	Btrc	Btrc	0	0	1	1	1	1	1	1	1	unihi	0.0144088	0.0144088	5.2	5.2	0.00369359	5.3	proteolysis involved in cellular protein catabolic process	modification-dependent protein catabolic process
8945	8945	BTRC	BTRC	12234	12234	Btrc	Btrc	0	0	1	1	1	1	1	1	1	unihi	0.0144088	0.0144088	5.2	5.2	0.00369359	5.3	proteolysis involved in cellular protein catabolic process	modification-dependent macromolecule catabolic process
8945	8945	BTRC	BTRC	12234	12234	Btrc	Btrc	0	0	1	1	1	1	1	1	1	unihi	0.0144088	0.0144088	5.2	5.2	0.00369359	5.3	proteolysis involved in cellular protein catabolic process	cellular protein catabolic process
8945	8945	BTRC	BTRC	12234	12234	Btrc	Btrc	0	0	1	1	1	1	1	1	1	unihi	0.0144088	0.0144088	5.2	5.2	0.00369359	5.3	proteolysis involved in cellular protein catabolic process	proteolysis involved in cellular protein catabolic process
8945	8945	BTRC	BTRC	12234	12234	Btrc	Btrc	0	0	1	1	1	1	1	1	1	unihi	0.0144088	0.0144088	5.2	5.2	0.00369359	5.3	proteolysis involved in cellular protein catabolic process	cell surface receptor linked signal transduction
8945	8945	BTRC	BTRC	12234	12234	Btrc	Btrc	0	0	1	1	1	1	1	1	1	unihi	0.0144088	0.0144088	5.2	5.2	0.00369359	5.3	cell surface receptor linked signal transduction	interspecies interaction between organisms
8945	8945	BTRC	BTRC	12234	12234	Btrc	Btrc	0	0	1	1	1	1	1	1	1	unihi	0.0144088	0.0144088	5.2	5.2	0.00369359	5.3	cell surface receptor linked signal transduction	mitotic cell cycle
8945	8945	BTRC	BTRC	12234	12234	Btrc	Btrc	0	0	1	1	1	1	1	1	1	unihi	0.0144088	0.0144088	5.2	5.2	0.00369359	5.3	cell surface receptor linked signal transduction	positive regulation of molecular function
8945	8945	BTRC	BTRC	12234	12234	Btrc	Btrc	0	0	1	1	1	1	1	1	1	unihi	0.0144088	0.0144088	5.2	5.2	0.00369359	5.3	cell surface receptor linked signal transduction	modification-dependent protein catabolic process
8945	8945	BTRC	BTRC	12234	12234	Btrc	Btrc	0	0	1	1	1	1	1	1	1	unihi	0.0144088	0.0144088	5.2	5.2	0.00369359	5.3	cell surface receptor linked signal transduction	modification-dependent macromolecule catabolic process
8945	8945	BTRC	BTRC	12234	12234	Btrc	Btrc	0	0	1	1	1	1	1	1	1	unihi	0.0144088	0.0144088	5.2	5.2	0.00369359	5.3	cell surface receptor linked signal transduction	cellular protein catabolic process
8945	8945	BTRC	BTRC	12234	12234	Btrc	Btrc	0	0	1	1	1	1	1	1	1	unihi	0.0144088	0.0144088	5.2	5.2	0.00369359	5.3	cell surface receptor linked signal transduction	proteolysis involved in cellular protein catabolic process
8945	8945	BTRC	BTRC	12234	12234	Btrc	Btrc	0	0	1	1	1	1	1	1	1	unihi	0.0144088	0.0144088	5.2	5.2	0.00369359	5.3	cell surface receptor linked signal transduction	cell surface receptor linked signal transduction
1407	8914	CRY1	TIMELESS	12952	21853	Cry1	Timeless	0	0	1	1	1	1	1	0	0	unihi	0	0.300916	19.8	19.6	0	19.8	circadian rhythm	organ morphogenesis
1408	8914	CRY2	TIMELESS	12953	21853	Cry2	Timeless	0	0	1	1	1	1	1	0	0	unihi	0.0425479	0.300916	9.2	19.6	0.347146	10.3	circadian rhythm	organ morphogenesis
5187	8914	PER1	TIMELESS	18626	21853	Per1	Timeless	0	0	1	1	1	1	1	0	0	unihi	0	0.300916	17.7	19.6	4.89796e-05	12.4	circadian rhythm	organ morphogenesis
2932	8553	GSK3B	BHLHE40	56637	20893	Gsk3b	Bhlhb2	1	0	1	0	1	1	1	1	0	y2h	0.0032	0.000859098	3.5	12.4	0.057205	10.3	negative regulation of developmental process	circadian rhythm
9575	56938	CLOCK	ARNTL2	12753	272322	Clock	Arntl2	0	0	1	1	1	1	1	0	0	unihi	0	0.37551	23	16.5	0	22.6	positive regulation of transcription from RNA polymerase II promoter	response to external stimulus
23291	23291	FBXW11	FBXW11	103583	103583	Fbxw11	Fbxw11	0	0	1	1	1	1	1	1	1	unihi	0.00217924	0.00217924	4.6	4.6	0.000524927	4.6	modification-dependent protein catabolic process	modification-dependent protein catabolic process
23291	23291	FBXW11	FBXW11	103583	103583	Fbxw11	Fbxw11	0	0	1	1	1	1	1	1	1	unihi	0.00217924	0.00217924	4.6	4.6	0.000524927	4.6	modification-dependent protein catabolic process	modification-dependent macromolecule catabolic process
23291	23291	FBXW11	FBXW11	103583	103583	Fbxw11	Fbxw11	0	0	1	1	1	1	1	1	1	unihi	0.00217924	0.00217924	4.6	4.6	0.000524927	4.6	modification-dependent protein catabolic process	cellular protein catabolic process
23291	23291	FBXW11	FBXW11	103583	103583	Fbxw11	Fbxw11	0	0	1	1	1	1	1	1	1	unihi	0.00217924	0.00217924	4.6	4.6	0.000524927	4.6	modification-dependent protein catabolic process	proteolysis involved in cellular protein catabolic process
23291	23291	FBXW11	FBXW11	103583	103583	Fbxw11	Fbxw11	0	0	1	1	1	1	1	1	1	unihi	0.00217924	0.00217924	4.6	4.6	0.000524927	4.6	modification-dependent protein catabolic process	cell surface receptor linked signal transduction
23291	23291	FBXW11	FBXW11	103583	103583	Fbxw11	Fbxw11	0	0	1	1	1	1	1	1	1	unihi	0.00217924	0.00217924	4.6	4.6	0.000524927	4.6	modification-dependent macromolecule catabolic process	modification-dependent protein catabolic process
23291	23291	FBXW11	FBXW11	103583	103583	Fbxw11	Fbxw11	0	0	1	1	1	1	1	1	1	unihi	0.00217924	0.00217924	4.6	4.6	0.000524927	4.6	modification-dependent macromolecule catabolic process	modification-dependent macromolecule catabolic process
23291	23291	FBXW11	FBXW11	103583	103583	Fbxw11	Fbxw11	0	0	1	1	1	1	1	1	1	unihi	0.00217924	0.00217924	4.6	4.6	0.000524927	4.6	modification-dependent macromolecule catabolic process	cellular protein catabolic process
23291	23291	FBXW11	FBXW11	103583	103583	Fbxw11	Fbxw11	0	0	1	1	1	1	1	1	1	unihi	0.00217924	0.00217924	4.6	4.6	0.000524927	4.6	modification-dependent macromolecule catabolic process	proteolysis involved in cellular protein catabolic process
23291	23291	FBXW11	FBXW11	103583	103583	Fbxw11	Fbxw11	0	0	1	1	1	1	1	1	1	unihi	0.00217924	0.00217924	4.6	4.6	0.000524927	4.6	modification-dependent macromolecule catabolic process	cell surface receptor linked signal transduction
23291	23291	FBXW11	FBXW11	103583	103583	Fbxw11	Fbxw11	0	0	1	1	1	1	1	1	1	unihi	0.00217924	0.00217924	4.6	4.6	0.000524927	4.6	cellular protein catabolic process	modification-dependent protein catabolic process
23291	23291	FBXW11	FBXW11	103583	103583	Fbxw11	Fbxw11	0	0	1	1	1	1	1	1	1	unihi	0.00217924	0.00217924	4.6	4.6	0.000524927	4.6	cellular protein catabolic process	modification-dependent macromolecule catabolic process
23291	23291	FBXW11	FBXW11	103583	103583	Fbxw11	Fbxw11	0	0	1	1	1	1	1	1	1	unihi	0.00217924	0.00217924	4.6	4.6	0.000524927	4.6	cellular protein catabolic process	cellular protein catabolic process
23291	23291	FBXW11	FBXW11	103583	103583	Fbxw11	Fbxw11	0	0	1	1	1	1	1	1	1	unihi	0.00217924	0.00217924	4.6	4.6	0.000524927	4.6	cellular protein catabolic process	proteolysis involved in cellular protein catabolic process
23291	23291	FBXW11	FBXW11	103583	103583	Fbxw11	Fbxw11	0	0	1	1	1	1	1	1	1	unihi	0.00217924	0.00217924	4.6	4.6	0.000524927	4.6	cellular protein catabolic process	cell surface receptor linked signal transduction
23291	23291	FBXW11	FBXW11	103583	103583	Fbxw11	Fbxw11	0	0	1	1	1	1	1	1	1	unihi	0.00217924	0.00217924	4.6	4.6	0.000524927	4.6	proteolysis involved in cellular protein catabolic process	modification-dependent protein catabolic process
23291	23291	FBXW11	FBXW11	103583	103583	Fbxw11	Fbxw11	0	0	1	1	1	1	1	1	1	unihi	0.00217924	0.00217924	4.6	4.6	0.000524927	4.6	proteolysis involved in cellular protein catabolic process	modification-dependent macromolecule catabolic process
23291	23291	FBXW11	FBXW11	103583	103583	Fbxw11	Fbxw11	0	0	1	1	1	1	1	1	1	unihi	0.00217924	0.00217924	4.6	4.6	0.000524927	4.6	proteolysis involved in cellular protein catabolic process	cellular protein catabolic process
23291	23291	FBXW11	FBXW11	103583	103583	Fbxw11	Fbxw11	0	0	1	1	1	1	1	1	1	unihi	0.00217924	0.00217924	4.6	4.6	0.000524927	4.6	proteolysis involved in cellular protein catabolic process	proteolysis involved in cellular protein catabolic process
23291	23291	FBXW11	FBXW11	103583	103583	Fbxw11	Fbxw11	0	0	1	1	1	1	1	1	1	unihi	0.00217924	0.00217924	4.6	4.6	0.000524927	4.6	proteolysis involved in cellular protein catabolic process	cell surface receptor linked signal transduction
23291	23291	FBXW11	FBXW11	103583	103583	Fbxw11	Fbxw11	0	0	1	1	1	1	1	1	1	unihi	0.00217924	0.00217924	4.6	4.6	0.000524927	4.6	cell surface receptor linked signal transduction	modification-dependent protein catabolic process
23291	23291	FBXW11	FBXW11	103583	103583	Fbxw11	Fbxw11	0	0	1	1	1	1	1	1	1	unihi	0.00217924	0.00217924	4.6	4.6	0.000524927	4.6	cell surface receptor linked signal transduction	modification-dependent macromolecule catabolic process
23291	23291	FBXW11	FBXW11	103583	103583	Fbxw11	Fbxw11	0	0	1	1	1	1	1	1	1	unihi	0.00217924	0.00217924	4.6	4.6	0.000524927	4.6	cell surface receptor linked signal transduction	cellular protein catabolic process
23291	23291	FBXW11	FBXW11	103583	103583	Fbxw11	Fbxw11	0	0	1	1	1	1	1	1	1	unihi	0.00217924	0.00217924	4.6	4.6	0.000524927	4.6	cell surface receptor linked signal transduction	proteolysis involved in cellular protein catabolic process
23291	23291	FBXW11	FBXW11	103583	103583	Fbxw11	Fbxw11	0	0	1	1	1	1	1	1	1	unihi	0.00217924	0.00217924	4.6	4.6	0.000524927	4.6	cell surface receptor linked signal transduction	cell surface receptor linked signal transduction
190	6095	NR0B1	RORA	11614	19883	Nr0b1	Rora	0	0	1	1	0	0	1	0	0	ext	0.223004	3.89273e-05	19.7	21.9	0	21.1	negative regulation of transcription from RNA polymerase II promoter	positive regulation of transcription from RNA polymerase II promoter
190	6095	NR0B1	RORA	11614	19883	Nr0b1	Rora	0	0	1	1	0	0	1	0	0	ext	0.223004	3.89273e-05	19.7	21.9	0	21.1	negative regulation of transcription from RNA polymerase II promoter	anatomical structure formation
190	6095	NR0B1	RORA	11614	19883	Nr0b1	Rora	0	0	1	1	0	0	1	0	0	ext	0.223004	3.89273e-05	19.7	21.9	0	21.1	intracellular signaling cascade	positive regulation of transcription from RNA polymerase II promoter
190	6095	NR0B1	RORA	11614	19883	Nr0b1	Rora	0	0	1	1	0	0	1	0	0	ext	0.223004	3.89273e-05	19.7	21.9	0	21.1	intracellular signaling cascade	anatomical structure formation
190	6095	NR0B1	RORA	11614	19883	Nr0b1	Rora	0	0	1	1	0	0	1	0	0	ext	0.223004	3.89273e-05	19.7	21.9	0	21.1	negative regulation of developmental process	positive regulation of transcription from RNA polymerase II promoter
190	6095	NR0B1	RORA	11614	19883	Nr0b1	Rora	0	0	1	1	0	0	1	0	0	ext	0.223004	3.89273e-05	19.7	21.9	0	21.1	negative regulation of developmental process	anatomical structure formation
2932	8864	GSK3B	PER2	56637	18627	Gsk3b	Per2	0	1	0	0	1	1	1	1	0	man	0.0032	0	3.5	20.1	0	13.7	negative regulation of developmental process	circadian rhythm
196	406	AHR	ARNTL	11622	11865	Ahr	Arntl	0	0	1	1	0	0	1	0	0	ext	0.0121611	0	4.8	22.4	0	22.8	positive regulation of transcription from RNA polymerase II promoter	positive regulation of transcription from RNA polymerase II promoter
2932	9572	GSK3B	NR1D1	56637	217166	Gsk3b	Nr1d1	0	1	0	0	1	1	1	1	0	man	0.0032	0	3.5	6.8	0	6.3	negative regulation of developmental process	circadian rhythm
196	406	AHR	ARNTL	11622	11865	Ahr	Arntl	0	0	1	1	0	0	1	0	0	ext	0.0121611	0	4.8	22.4	0	22.8	anatomical structure formation	positive regulation of transcription from RNA polymerase II promoter
207	2146	AKT1	EZH2	11651	14056	Akt1	Ezh2	0	0	1	1	0	0	1	0	0	ext	0.0662924	0.00842676	10.3	5.7	0.00111198	7.2	response to organic substance	chromatin modification
207	2146	AKT1	EZH2	11651	14056	Akt1	Ezh2	0	0	1	1	0	0	1	0	0	ext	0.0662924	0.00842676	10.3	5.7	0.00111198	7.2	response to organic substance	chromatin organization
207	2146	AKT1	EZH2	11651	14056	Akt1	Ezh2	0	0	1	1	0	0	1	0	0	ext	0.0662924	0.00842676	10.3	5.7	0.00111198	7.2	mitotic cell cycle	chromatin modification
207	2146	AKT1	EZH2	11651	14056	Akt1	Ezh2	0	0	1	1	0	0	1	0	0	ext	0.0662924	0.00842676	10.3	5.7	0.00111198	7.2	mitotic cell cycle	chromatin organization
207	2146	AKT1	EZH2	11651	14056	Akt1	Ezh2	0	0	1	1	0	0	1	0	0	ext	0.0662924	0.00842676	10.3	5.7	0.00111198	7.2	homeostatic process	chromatin modification
207	2146	AKT1	EZH2	11651	14056	Akt1	Ezh2	0	0	1	1	0	0	1	0	0	ext	0.0662924	0.00842676	10.3	5.7	0.00111198	7.2	homeostatic process	chromatin organization
207	2146	AKT1	EZH2	11651	14056	Akt1	Ezh2	0	0	1	1	0	0	1	0	0	ext	0.0662924	0.00842676	10.3	5.7	0.00111198	7.2	protein amino acid phosphorylation	chromatin modification
207	2146	AKT1	EZH2	11651	14056	Akt1	Ezh2	0	0	1	1	0	0	1	0	0	ext	0.0662924	0.00842676	10.3	5.7	0.00111198	7.2	protein amino acid phosphorylation	chromatin organization
207	2146	AKT1	EZH2	11651	14056	Akt1	Ezh2	0	0	1	1	0	0	1	0	0	ext	0.0662924	0.00842676	10.3	5.7	0.00111198	7.2	intracellular signaling cascade	chromatin modification
207	2146	AKT1	EZH2	11651	14056	Akt1	Ezh2	0	0	1	1	0	0	1	0	0	ext	0.0662924	0.00842676	10.3	5.7	0.00111198	7.2	intracellular signaling cascade	chromatin organization
207	2146	AKT1	EZH2	11651	14056	Akt1	Ezh2	0	0	1	1	0	0	1	0	0	ext	0.0662924	0.00842676	10.3	5.7	0.00111198	7.2	positive regulation of molecular function	chromatin modification
207	2146	AKT1	EZH2	11651	14056	Akt1	Ezh2	0	0	1	1	0	0	1	0	0	ext	0.0662924	0.00842676	10.3	5.7	0.00111198	7.2	positive regulation of molecular function	chromatin organization
207	2146	AKT1	EZH2	11651	14056	Akt1	Ezh2	0	0	1	1	0	0	1	0	0	ext	0.0662924	0.00842676	10.3	5.7	0.00111198	7.2	modification-dependent protein catabolic process	chromatin modification
207	2146	AKT1	EZH2	11651	14056	Akt1	Ezh2	0	0	1	1	0	0	1	0	0	ext	0.0662924	0.00842676	10.3	5.7	0.00111198	7.2	modification-dependent protein catabolic process	chromatin organization
207	2146	AKT1	EZH2	11651	14056	Akt1	Ezh2	0	0	1	1	0	0	1	0	0	ext	0.0662924	0.00842676	10.3	5.7	0.00111198	7.2	modification-dependent macromolecule catabolic process	chromatin modification
207	2146	AKT1	EZH2	11651	14056	Akt1	Ezh2	0	0	1	1	0	0	1	0	0	ext	0.0662924	0.00842676	10.3	5.7	0.00111198	7.2	modification-dependent macromolecule catabolic process	chromatin organization
207	2146	AKT1	EZH2	11651	14056	Akt1	Ezh2	0	0	1	1	0	0	1	0	0	ext	0.0662924	0.00842676	10.3	5.7	0.00111198	7.2	tissue development	chromatin modification
207	2146	AKT1	EZH2	11651	14056	Akt1	Ezh2	0	0	1	1	0	0	1	0	0	ext	0.0662924	0.00842676	10.3	5.7	0.00111198	7.2	tissue development	chromatin organization
207	2146	AKT1	EZH2	11651	14056	Akt1	Ezh2	0	0	1	1	0	0	1	0	0	ext	0.0662924	0.00842676	10.3	5.7	0.00111198	7.2	cellular protein catabolic process	chromatin modification
207	2146	AKT1	EZH2	11651	14056	Akt1	Ezh2	0	0	1	1	0	0	1	0	0	ext	0.0662924	0.00842676	10.3	5.7	0.00111198	7.2	cellular protein catabolic process	chromatin organization
207	2146	AKT1	EZH2	11651	14056	Akt1	Ezh2	0	0	1	1	0	0	1	0	0	ext	0.0662924	0.00842676	10.3	5.7	0.00111198	7.2	proteolysis involved in cellular protein catabolic process	chromatin modification
207	2146	AKT1	EZH2	11651	14056	Akt1	Ezh2	0	0	1	1	0	0	1	0	0	ext	0.0662924	0.00842676	10.3	5.7	0.00111198	7.2	proteolysis involved in cellular protein catabolic process	chromatin organization
207	2146	AKT1	EZH2	11651	14056	Akt1	Ezh2	0	0	1	1	0	0	1	0	0	ext	0.0662924	0.00842676	10.3	5.7	0.00111198	7.2	negative regulation of developmental process	chromatin modification
207	2146	AKT1	EZH2	11651	14056	Akt1	Ezh2	0	0	1	1	0	0	1	0	0	ext	0.0662924	0.00842676	10.3	5.7	0.00111198	7.2	negative regulation of developmental process	chromatin organization
207	2146	AKT1	EZH2	11651	14056	Akt1	Ezh2	0	0	1	1	0	0	1	0	0	ext	0.0662924	0.00842676	10.3	5.7	0.00111198	7.2	response to external stimulus	chromatin modification
207	2146	AKT1	EZH2	11651	14056	Akt1	Ezh2	0	0	1	1	0	0	1	0	0	ext	0.0662924	0.00842676	10.3	5.7	0.00111198	7.2	response to external stimulus	chromatin organization
207	2146	AKT1	EZH2	11651	14056	Akt1	Ezh2	0	0	1	1	0	0	1	0	0	ext	0.0662924	0.00842676	10.3	5.7	0.00111198	7.2	cell surface receptor linked signal transduction	chromatin modification
207	2146	AKT1	EZH2	11651	14056	Akt1	Ezh2	0	0	1	1	0	0	1	0	0	ext	0.0662924	0.00842676	10.3	5.7	0.00111198	7.2	cell surface receptor linked signal transduction	chromatin organization
367	4841	AR	NONO	11835	53610	Ar	Nono	0	0	1	1	0	0	1	0	0	ext	0.0132154	0	16.1	4.1	0.0616864	16.1	positive regulation of transcription from RNA polymerase II promoter	DNA repair
367	4841	AR	NONO	11835	53610	Ar	Nono	0	0	1	1	0	0	1	0	0	ext	0.0132154	0	16.1	4.1	0.0616864	16.1	embryonic development	DNA repair
367	4841	AR	NONO	11835	53610	Ar	Nono	0	0	1	1	0	0	1	0	0	ext	0.0132154	0	16.1	4.1	0.0616864	16.1	intracellular signaling cascade	DNA repair
8864	8914	PER2	TIMELESS	18627	21853	Per2	Timeless	0	0	1	1	1	1	1	0	0	unihi	0	0.300916	20.1	19.6	0	14.4	circadian rhythm	organ morphogenesis
406	2033	ARNTL	EP300	11865	328572	Arntl	Ep300	0	0	1	1	0	1	0	0	0	ext	0	0.0181655	22.4	5.6	0	22.9	circadian rhythm	organ morphogenesis
406	2034	ARNTL	EPAS1	11865	13819	Arntl	Epas1	0	0	1	1	0	1	0	0	0	ext	0	0.239529	22.4	7.4	0	22.5	circadian rhythm	organ morphogenesis
406	3091	ARNTL	HIF1A	11865	15251	Arntl	Hif1a	0	0	1	1	0	1	0	0	0	ext	0	0.00680597	22.4	9.6	0	22.4	circadian rhythm	organ morphogenesis
4862	6256	NPAS2	RXRA	18143	20181	Npas2	Rxra	0	0	1	1	0	1	0	0	0	ext	0	0.00211631	0.9	6.9	0	1.6	circadian rhythm	organ morphogenesis
8864	8945	PER2	BTRC	18627	12234	Per2	Btrc	0	1	0	0	1	1	1	0	1	man	0	0.0144088	20.1	5.2	0	13.8	circadian rhythm	positive regulation of molecular function
406	2033	ARNTL	EP300	11865	328572	Arntl	Ep300	0	0	1	1	0	1	0	0	0	ext	0	0.0181655	22.4	5.6	0	22.9	circadian rhythm	positive regulation of molecular function
406	3091	ARNTL	HIF1A	11865	15251	Arntl	Hif1a	0	0	1	1	0	1	0	0	0	ext	0	0.00680597	22.4	9.6	0	22.4	circadian rhythm	positive regulation of molecular function
406	9575	ARNTL	CLOCK	11865	12753	Arntl	Clock	1	0	1	1	1	1	1	0	0	unihi.y2h	0	0	22.4	23	0	22.6	circadian rhythm	positive regulation of transcription from RNA polymerase II promoter
406	2033	ARNTL	EP300	11865	328572	Arntl	Ep300	0	0	1	1	0	1	0	0	0	ext	0	0.0181655	22.4	5.6	0	22.9	positive regulation of transcription from RNA polymerase II promoter	positive regulation of transcription from RNA polymerase II promoter
406	2033	ARNTL	EP300	11865	328572	Arntl	Ep300	0	0	1	1	0	1	0	0	0	ext	0	0.0181655	22.4	5.6	0	22.9	positive regulation of transcription from RNA polymerase II promoter	chromatin modification
406	2033	ARNTL	EP300	11865	328572	Arntl	Ep300	0	0	1	1	0	1	0	0	0	ext	0	0.0181655	22.4	5.6	0	22.9	positive regulation of transcription from RNA polymerase II promoter	chromatin organization
406	2033	ARNTL	EP300	11865	328572	Arntl	Ep300	0	0	1	1	0	1	0	0	0	ext	0	0.0181655	22.4	5.6	0	22.9	positive regulation of transcription from RNA polymerase II promoter	interspecies interaction between organisms
406	2033	ARNTL	EP300	11865	328572	Arntl	Ep300	0	0	1	1	0	1	0	0	0	ext	0	0.0181655	22.4	5.6	0	22.9	positive regulation of transcription from RNA polymerase II promoter	organ morphogenesis
406	2033	ARNTL	EP300	11865	328572	Arntl	Ep300	0	0	1	1	0	1	0	0	0	ext	0	0.0181655	22.4	5.6	0	22.9	positive regulation of transcription from RNA polymerase II promoter	embryonic development
406	2033	ARNTL	EP300	11865	328572	Arntl	Ep300	0	0	1	1	0	1	0	0	0	ext	0	0.0181655	22.4	5.6	0	22.9	positive regulation of transcription from RNA polymerase II promoter	homeostatic process
406	2033	ARNTL	EP300	11865	328572	Arntl	Ep300	0	0	1	1	0	1	0	0	0	ext	0	0.0181655	22.4	5.6	0	22.9	positive regulation of transcription from RNA polymerase II promoter	positive regulation of molecular function
406	2033	ARNTL	EP300	11865	328572	Arntl	Ep300	0	0	1	1	0	1	0	0	0	ext	0	0.0181655	22.4	5.6	0	22.9	positive regulation of transcription from RNA polymerase II promoter	tissue development
406	4862	ARNTL	NPAS2	11865	18143	Arntl	Npas2	1	0	1	1	1	1	1	0	0	unihi.y2h	0	0	22.4	0.9	0	23.5	circadian rhythm	positive regulation of transcription from RNA polymerase II promoter
1407	9575	CRY1	CLOCK	12952	12753	Cry1	Clock	1	0	1	0	1	1	1	0	0	y2h	0	0	19.8	23	0	20.7	circadian rhythm	positive regulation of transcription from RNA polymerase II promoter
1407	4862	CRY1	NPAS2	12952	18143	Cry1	Npas2	1	0	1	0	1	1	1	0	0	y2h	0	0	19.8	0.9	0	22.1	circadian rhythm	positive regulation of transcription from RNA polymerase II promoter
1408	9575	CRY2	CLOCK	12953	12753	Cry2	Clock	1	0	1	0	1	1	1	0	0	y2h	0.0425479	0	9.2	23	0	0	circadian rhythm	positive regulation of transcription from RNA polymerase II promoter
1408	4862	CRY2	NPAS2	12953	18143	Cry2	Npas2	1	0	1	0	1	1	1	0	0	y2h	0.0425479	0	9.2	0.9	0	1.6	circadian rhythm	positive regulation of transcription from RNA polymerase II promoter
4862	9575	NPAS2	CLOCK	18143	12753	Npas2	Clock	1	0	1	0	1	1	1	0	0	y2h	0	0	0.9	23	0	0.3	circadian rhythm	positive regulation of transcription from RNA polymerase II promoter
8553	9575	BHLHE40	CLOCK	20893	12753	Bhlhb2	Clock	1	0	1	0	1	1	1	0	0	y2h	0.000859098	0	12.4	23	0.0452461	19.8	circadian rhythm	positive regulation of transcription from RNA polymerase II promoter
8864	9575	PER2	CLOCK	18627	12753	Per2	Clock	1	0	1	0	1	1	1	0	0	y2h	0	0	20.1	23	0	15.8	circadian rhythm	positive regulation of transcription from RNA polymerase II promoter
406	2034	ARNTL	EPAS1	11865	13819	Arntl	Epas1	0	0	1	1	0	1	0	0	0	ext	0	0.239529	22.4	7.4	0	22.5	positive regulation of transcription from RNA polymerase II promoter	positive regulation of transcription from RNA polymerase II promoter
406	2034	ARNTL	EPAS1	11865	13819	Arntl	Epas1	0	0	1	1	0	1	0	0	0	ext	0	0.239529	22.4	7.4	0	22.5	positive regulation of transcription from RNA polymerase II promoter	hemopoiesis
406	2034	ARNTL	EPAS1	11865	13819	Arntl	Epas1	0	0	1	1	0	1	0	0	0	ext	0	0.239529	22.4	7.4	0	22.5	positive regulation of transcription from RNA polymerase II promoter	hemopoietic or lymphoid organ development
406	2034	ARNTL	EPAS1	11865	13819	Arntl	Epas1	0	0	1	1	0	1	0	0	0	ext	0	0.239529	22.4	7.4	0	22.5	positive regulation of transcription from RNA polymerase II promoter	immune system development
406	2034	ARNTL	EPAS1	11865	13819	Arntl	Epas1	0	0	1	1	0	1	0	0	0	ext	0	0.239529	22.4	7.4	0	22.5	positive regulation of transcription from RNA polymerase II promoter	organ morphogenesis
406	2034	ARNTL	EPAS1	11865	13819	Arntl	Epas1	0	0	1	1	0	1	0	0	0	ext	0	0.239529	22.4	7.4	0	22.5	positive regulation of transcription from RNA polymerase II promoter	embryonic development
406	2034	ARNTL	EPAS1	11865	13819	Arntl	Epas1	0	0	1	1	0	1	0	0	0	ext	0	0.239529	22.4	7.4	0	22.5	positive regulation of transcription from RNA polymerase II promoter	homeostatic process
406	2034	ARNTL	EPAS1	11865	13819	Arntl	Epas1	0	0	1	1	0	1	0	0	0	ext	0	0.239529	22.4	7.4	0	22.5	positive regulation of transcription from RNA polymerase II promoter	anatomical structure formation
406	2033	ARNTL	EP300	11865	328572	Arntl	Ep300	0	0	1	1	0	1	0	0	0	ext	0	0.0181655	22.4	5.6	0	22.9	circadian rhythm	positive regulation of transcription from RNA polymerase II promoter
406	2034	ARNTL	EPAS1	11865	13819	Arntl	Epas1	0	0	1	1	0	1	0	0	0	ext	0	0.239529	22.4	7.4	0	22.5	circadian rhythm	positive regulation of transcription from RNA polymerase II promoter
406	3091	ARNTL	HIF1A	11865	15251	Arntl	Hif1a	0	0	1	1	0	1	0	0	0	ext	0	0.00680597	22.4	9.6	0	22.4	circadian rhythm	positive regulation of transcription from RNA polymerase II promoter
406	266743	ARNTL	NPAS4	11865	225872	Arntl	Npas4	0	0	1	1	0	1	0	0	0	ext	0	0.30441	22.4	19.5	0	22.2	circadian rhythm	positive regulation of transcription from RNA polymerase II promoter
4862	6256	NPAS2	RXRA	18143	20181	Npas2	Rxra	0	0	1	1	0	1	0	0	0	ext	0	0.00211631	0.9	6.9	0	1.6	circadian rhythm	positive regulation of transcription from RNA polymerase II promoter
406	1454	ARNTL	CSNK1E	11865	27373	Arntl	Csnk1e	1	0	1	1	1	1	1	0	1	unihi.y2h	0	0.0768418	22.4	16.6	0	22.1	circadian rhythm	protein amino acid phosphorylation
1407	1454	CRY1	CSNK1E	12952	27373	Cry1	Csnk1e	1	1	1	1	1	1	1	0	1	man.y2h	0	0.0768418	19.8	16.6	0	19.6	circadian rhythm	protein amino acid phosphorylation
1408	2932	CRY2	GSK3B	12953	56637	Cry2	Gsk3b	0	1	0	0	1	1	1	0	1	man	0.0425479	0.0032	9.2	3.5	0.0327913	6.3	circadian rhythm	protein amino acid phosphorylation
406	1457	ARNTL	CSNK2A1	11865	12995	Arntl	Csnk2a1	0	1	0	0	1	1	1	0	1	man	0	0.000167929	22.4	6.5	0	22.8	circadian rhythm	protein amino acid phosphorylation
1407	1453	CRY1	CSNK1D	12952	104318	Cry1	Csnk1d	0	1	0	0	1	1	1	0	1	man	0	0.029129	19.8	2.8	0	20.2	circadian rhythm	protein amino acid phosphorylation
1408	1453	CRY2	CSNK1D	12953	104318	Cry2	Csnk1d	0	1	0	0	1	1	1	0	1	man	0.0425479	0.029129	9.2	2.8	0.0819775	7.1	circadian rhythm	protein amino acid phosphorylation
8553	79176	BHLHE40	FBXL15	20893	68431	Bhlhb2	Fbxl15	1	0	1	0	1	1	1	0	1	y2h	0.000859098	0.0111513	12.4	18.4	0.00113402	13.8	circadian rhythm	proteolysis involved in cellular protein catabolic process
8864	8945	PER2	BTRC	18627	12234	Per2	Btrc	0	1	0	0	1	1	1	0	1	man	0	0.0144088	20.1	5.2	0	13.8	circadian rhythm	proteolysis involved in cellular protein catabolic process
406	3091	ARNTL	HIF1A	11865	15251	Arntl	Hif1a	0	0	1	1	0	1	0	0	0	ext	0	0.00680597	22.4	9.6	0	22.4	positive regulation of transcription from RNA polymerase II promoter	positive regulation of transcription from RNA polymerase II promoter
406	3091	ARNTL	HIF1A	11865	15251	Arntl	Hif1a	0	0	1	1	0	1	0	0	0	ext	0	0.00680597	22.4	9.6	0	22.4	positive regulation of transcription from RNA polymerase II promoter	hemopoiesis
406	3091	ARNTL	HIF1A	11865	15251	Arntl	Hif1a	0	0	1	1	0	1	0	0	0	ext	0	0.00680597	22.4	9.6	0	22.4	positive regulation of transcription from RNA polymerase II promoter	hemopoietic or lymphoid organ development
406	3091	ARNTL	HIF1A	11865	15251	Arntl	Hif1a	0	0	1	1	0	1	0	0	0	ext	0	0.00680597	22.4	9.6	0	22.4	positive regulation of transcription from RNA polymerase II promoter	immune system development
406	3091	ARNTL	HIF1A	11865	15251	Arntl	Hif1a	0	0	1	1	0	1	0	0	0	ext	0	0.00680597	22.4	9.6	0	22.4	positive regulation of transcription from RNA polymerase II promoter	regulation of cell proliferation
406	3091	ARNTL	HIF1A	11865	15251	Arntl	Hif1a	0	0	1	1	0	1	0	0	0	ext	0	0.00680597	22.4	9.6	0	22.4	positive regulation of transcription from RNA polymerase II promoter	organ morphogenesis
406	3091	ARNTL	HIF1A	11865	15251	Arntl	Hif1a	0	0	1	1	0	1	0	0	0	ext	0	0.00680597	22.4	9.6	0	22.4	positive regulation of transcription from RNA polymerase II promoter	embryonic development
406	3091	ARNTL	HIF1A	11865	15251	Arntl	Hif1a	0	0	1	1	0	1	0	0	0	ext	0	0.00680597	22.4	9.6	0	22.4	positive regulation of transcription from RNA polymerase II promoter	homeostatic process
406	3091	ARNTL	HIF1A	11865	15251	Arntl	Hif1a	0	0	1	1	0	1	0	0	0	ext	0	0.00680597	22.4	9.6	0	22.4	positive regulation of transcription from RNA polymerase II promoter	positive regulation of molecular function
406	3091	ARNTL	HIF1A	11865	15251	Arntl	Hif1a	0	0	1	1	0	1	0	0	0	ext	0	0.00680597	22.4	9.6	0	22.4	positive regulation of transcription from RNA polymerase II promoter	tissue development
406	3091	ARNTL	HIF1A	11865	15251	Arntl	Hif1a	0	0	1	1	0	1	0	0	0	ext	0	0.00680597	22.4	9.6	0	22.4	positive regulation of transcription from RNA polymerase II promoter	response to external stimulus
406	3091	ARNTL	HIF1A	11865	15251	Arntl	Hif1a	0	0	1	1	0	1	0	0	0	ext	0	0.00680597	22.4	9.6	0	22.4	positive regulation of transcription from RNA polymerase II promoter	cell surface receptor linked signal transduction
406	3091	ARNTL	HIF1A	11865	15251	Arntl	Hif1a	0	0	1	1	0	1	0	0	0	ext	0	0.00680597	22.4	9.6	0	22.4	positive regulation of transcription from RNA polymerase II promoter	anatomical structure formation
1407	26224	CRY1	FBXL3	12952	50789	Cry1	Fbxl3	0	1	0	0	1	1	1	0	1	man	0	0.00326556	19.8	4.7	0	20.1	circadian rhythm	proteolysis involved in cellular protein catabolic process
1408	26224	CRY2	FBXL3	12953	50789	Cry2	Fbxl3	0	1	0	0	1	1	1	0	1	man	0.0425479	0.00326556	9.2	4.7	0.0099	7.3	circadian rhythm	proteolysis involved in cellular protein catabolic process
406	3320	ARNTL	HSP90AA1	11865	15519	Arntl	Hsp90aa1	0	0	1	1	0	1	0	0	0	ext	0	0	22.4	19.2	0	21.7	positive regulation of transcription from RNA polymerase II promoter	response to organic substance
406	3320	ARNTL	HSP90AA1	11865	15519	Arntl	Hsp90aa1	0	0	1	1	0	1	0	0	0	ext	0	0	22.4	19.2	0	21.7	positive regulation of transcription from RNA polymerase II promoter	anatomical structure formation
8864	23291	PER2	FBXW11	18627	103583	Per2	Fbxw11	0	1	0	0	1	1	1	0	1	man	0	0.00217924	20.1	4.6	0	13.9	circadian rhythm	proteolysis involved in cellular protein catabolic process
1407	8914	CRY1	TIMELESS	12952	21853	Cry1	Timeless	0	0	1	1	1	1	1	0	0	unihi	0	0.300916	19.8	19.6	0	19.8	circadian rhythm	regulation of cell proliferation
1408	8914	CRY2	TIMELESS	12953	21853	Cry2	Timeless	0	0	1	1	1	1	1	0	0	unihi	0.0425479	0.300916	9.2	19.6	0.347146	10.3	circadian rhythm	regulation of cell proliferation
5187	8914	PER1	TIMELESS	18626	21853	Per1	Timeless	0	0	1	1	1	1	1	0	0	unihi	0	0.300916	17.7	19.6	4.89796e-05	12.4	circadian rhythm	regulation of cell proliferation
406	8850	ARNTL	KAT2B	11865	18519	Arntl	Kat2b	0	0	1	1	0	1	0	0	0	ext	0	0	22.4	8.4	0	22.6	positive regulation of transcription from RNA polymerase II promoter	chromatin modification
406	8850	ARNTL	KAT2B	11865	18519	Arntl	Kat2b	0	0	1	1	0	1	0	0	0	ext	0	0	22.4	8.4	0	22.6	positive regulation of transcription from RNA polymerase II promoter	chromatin organization
406	8850	ARNTL	KAT2B	11865	18519	Arntl	Kat2b	0	0	1	1	0	1	0	0	0	ext	0	0	22.4	8.4	0	22.6	positive regulation of transcription from RNA polymerase II promoter	interspecies interaction between organisms
406	8850	ARNTL	KAT2B	11865	18519	Arntl	Kat2b	0	0	1	1	0	1	0	0	0	ext	0	0	22.4	8.4	0	22.6	positive regulation of transcription from RNA polymerase II promoter	regulation of cell proliferation
8864	8914	PER2	TIMELESS	18627	21853	Per2	Timeless	0	0	1	1	1	1	1	0	0	unihi	0	0.300916	20.1	19.6	0	14.4	circadian rhythm	regulation of cell proliferation
406	266743	ARNTL	NPAS4	11865	225872	Arntl	Npas4	0	0	1	1	0	1	0	0	0	ext	0	0.30441	22.4	19.5	0	22.2	positive regulation of transcription from RNA polymerase II promoter	positive regulation of transcription from RNA polymerase II promoter
546	2146	ATRX	EZH2	22589	14056	Atrx	Ezh2	0	0	1	1	0	0	1	0	0	ext	0.000417919	0.00842676	7.3	5.7	4.78088e-05	6.4	DNA repair	chromatin modification
546	2146	ATRX	EZH2	22589	14056	Atrx	Ezh2	0	0	1	1	0	0	1	0	0	ext	0.000417919	0.00842676	7.3	5.7	4.78088e-05	6.4	DNA repair	chromatin organization
760	4841	CA2	NONO	12349	53610	Car2	Nono	0	0	1	1	0	0	1	0	0	ext	0.0947003	0	19.8	4.1	0.111477	22.4	organ morphogenesis	DNA repair
760	4841	CA2	NONO	12349	53610	Car2	Nono	0	0	1	1	0	0	1	0	0	ext	0.0947003	0	19.8	4.1	0.111477	22.4	tissue development	DNA repair
1050	1628	CEBPA	DBP	12606	13170	Cebpa	Dbp	0	0	1	1	0	0	1	0	0	ext	0.00801938	0	7.4	10.1	0	9.9	positive regulation of transcription from RNA polymerase II promoter	regulation of cell proliferation
1050	1628	CEBPA	DBP	12606	13170	Cebpa	Dbp	0	0	1	1	0	0	1	0	0	ext	0.00801938	0	7.4	10.1	0	9.9	negative regulation of transcription from RNA polymerase II promoter	regulation of cell proliferation
1050	1628	CEBPA	DBP	12606	13170	Cebpa	Dbp	0	0	1	1	0	0	1	0	0	ext	0.00801938	0	7.4	10.1	0	9.9	interspecies interaction between organisms	regulation of cell proliferation
1050	1628	CEBPA	DBP	12606	13170	Cebpa	Dbp	0	0	1	1	0	0	1	0	0	ext	0.00801938	0	7.4	10.1	0	9.9	hemopoiesis	regulation of cell proliferation
1050	1628	CEBPA	DBP	12606	13170	Cebpa	Dbp	0	0	1	1	0	0	1	0	0	ext	0.00801938	0	7.4	10.1	0	9.9	hemopoietic or lymphoid organ development	regulation of cell proliferation
1050	1628	CEBPA	DBP	12606	13170	Cebpa	Dbp	0	0	1	1	0	0	1	0	0	ext	0.00801938	0	7.4	10.1	0	9.9	immune system development	regulation of cell proliferation
1050	1628	CEBPA	DBP	12606	13170	Cebpa	Dbp	0	0	1	1	0	0	1	0	0	ext	0.00801938	0	7.4	10.1	0	9.9	regulation of cell proliferation	regulation of cell proliferation
1050	1628	CEBPA	DBP	12606	13170	Cebpa	Dbp	0	0	1	1	0	0	1	0	0	ext	0.00801938	0	7.4	10.1	0	9.9	embryonic development	regulation of cell proliferation
1050	1628	CEBPA	DBP	12606	13170	Cebpa	Dbp	0	0	1	1	0	0	1	0	0	ext	0.00801938	0	7.4	10.1	0	9.9	cell surface receptor linked signal transduction	regulation of cell proliferation
6774	8553	STAT3	BHLHE40	20848	20893	Stat3	Bhlhb2	0	0	1	1	0	0	1	0	0	ext	0.00255469	0.000859098	3.2	12.4	0.177285	9.1	negative regulation of transcription from RNA polymerase II promoter	circadian rhythm
1111	8914	CHEK1	TIMELESS	12649	21853	Chek1	Timeless	0	0	1	1	0	0	1	0	0	ext	0.0379367	0.300916	12	19.6	0.12388	14.8	DNA repair	regulation of cell proliferation
1111	8914	CHEK1	TIMELESS	12649	21853	Chek1	Timeless	0	0	1	1	0	0	1	0	0	ext	0.0379367	0.300916	12	19.6	0.12388	14.8	DNA repair	organ morphogenesis
1111	8914	CHEK1	TIMELESS	12649	21853	Chek1	Timeless	0	0	1	1	0	0	1	0	0	ext	0.0379367	0.300916	12	19.6	0.12388	14.8	DNA repair	mitotic cell cycle
1111	8914	CHEK1	TIMELESS	12649	21853	Chek1	Timeless	0	0	1	1	0	0	1	0	0	ext	0.0379367	0.300916	12	19.6	0.12388	14.8	DNA repair	tissue development
2932	8553	GSK3B	BHLHE40	56637	20893	Gsk3b	Bhlhb2	1	0	1	0	1	1	1	1	0	y2h	0.0032	0.000859098	3.5	12.4	0.057205	10.3	organ morphogenesis	circadian rhythm
1111	8914	CHEK1	TIMELESS	12649	21853	Chek1	Timeless	0	0	1	1	0	0	1	0	0	ext	0.0379367	0.300916	12	19.6	0.12388	14.8	regulation of cell proliferation	regulation of cell proliferation
1111	8914	CHEK1	TIMELESS	12649	21853	Chek1	Timeless	0	0	1	1	0	0	1	0	0	ext	0.0379367	0.300916	12	19.6	0.12388	14.8	regulation of cell proliferation	organ morphogenesis
1111	8914	CHEK1	TIMELESS	12649	21853	Chek1	Timeless	0	0	1	1	0	0	1	0	0	ext	0.0379367	0.300916	12	19.6	0.12388	14.8	regulation of cell proliferation	mitotic cell cycle
1111	8914	CHEK1	TIMELESS	12649	21853	Chek1	Timeless	0	0	1	1	0	0	1	0	0	ext	0.0379367	0.300916	12	19.6	0.12388	14.8	regulation of cell proliferation	tissue development
6096	9575	RORB	CLOCK	225998	12753	Rorb	Clock	1	0	1	0	1	1	1	0	0	y2h	0.531295	0	22	23	0	23	organ morphogenesis	circadian rhythm
1111	8914	CHEK1	TIMELESS	12649	21853	Chek1	Timeless	0	0	1	1	0	0	1	0	0	ext	0.0379367	0.300916	12	19.6	0.12388	14.8	mitotic cell cycle	regulation of cell proliferation
1111	8914	CHEK1	TIMELESS	12649	21853	Chek1	Timeless	0	0	1	1	0	0	1	0	0	ext	0.0379367	0.300916	12	19.6	0.12388	14.8	mitotic cell cycle	organ morphogenesis
1111	8914	CHEK1	TIMELESS	12649	21853	Chek1	Timeless	0	0	1	1	0	0	1	0	0	ext	0.0379367	0.300916	12	19.6	0.12388	14.8	mitotic cell cycle	mitotic cell cycle
1111	8914	CHEK1	TIMELESS	12649	21853	Chek1	Timeless	0	0	1	1	0	0	1	0	0	ext	0.0379367	0.300916	12	19.6	0.12388	14.8	mitotic cell cycle	tissue development
6096	8553	RORB	BHLHE40	225998	20893	Rorb	Bhlhb2	1	0	1	0	1	1	1	0	0	y2h	0.531295	0.000859098	22	12.4	0.000978892	12.7	organ morphogenesis	circadian rhythm
1111	8914	CHEK1	TIMELESS	12649	21853	Chek1	Timeless	0	0	1	1	0	0	1	0	0	ext	0.0379367	0.300916	12	19.6	0.12388	14.8	protein amino acid phosphorylation	regulation of cell proliferation
1111	8914	CHEK1	TIMELESS	12649	21853	Chek1	Timeless	0	0	1	1	0	0	1	0	0	ext	0.0379367	0.300916	12	19.6	0.12388	14.8	protein amino acid phosphorylation	organ morphogenesis
1111	8914	CHEK1	TIMELESS	12649	21853	Chek1	Timeless	0	0	1	1	0	0	1	0	0	ext	0.0379367	0.300916	12	19.6	0.12388	14.8	protein amino acid phosphorylation	mitotic cell cycle
1111	8914	CHEK1	TIMELESS	12649	21853	Chek1	Timeless	0	0	1	1	0	0	1	0	0	ext	0.0379367	0.300916	12	19.6	0.12388	14.8	protein amino acid phosphorylation	tissue development
2932	8864	GSK3B	PER2	56637	18627	Gsk3b	Per2	0	1	0	0	1	1	1	1	0	man	0.0032	0	3.5	20.1	0	13.7	organ morphogenesis	circadian rhythm
1111	8914	CHEK1	TIMELESS	12649	21853	Chek1	Timeless	0	0	1	1	0	0	1	0	0	ext	0.0379367	0.300916	12	19.6	0.12388	14.8	intracellular signaling cascade	regulation of cell proliferation
1111	8914	CHEK1	TIMELESS	12649	21853	Chek1	Timeless	0	0	1	1	0	0	1	0	0	ext	0.0379367	0.300916	12	19.6	0.12388	14.8	intracellular signaling cascade	organ morphogenesis
1111	8914	CHEK1	TIMELESS	12649	21853	Chek1	Timeless	0	0	1	1	0	0	1	0	0	ext	0.0379367	0.300916	12	19.6	0.12388	14.8	intracellular signaling cascade	mitotic cell cycle
1111	8914	CHEK1	TIMELESS	12649	21853	Chek1	Timeless	0	0	1	1	0	0	1	0	0	ext	0.0379367	0.300916	12	19.6	0.12388	14.8	intracellular signaling cascade	tissue development
2932	9572	GSK3B	NR1D1	56637	217166	Gsk3b	Nr1d1	0	1	0	0	1	1	1	1	0	man	0.0032	0	3.5	6.8	0	6.3	organ morphogenesis	circadian rhythm
1387	4862	CREBBP	NPAS2	12914	18143	Crebbp	Npas2	0	0	1	1	0	0	1	0	0	ext	0.000545079	0	3.6	0.9	0	1.8	chromatin modification	positive regulation of transcription from RNA polymerase II promoter
2033	9575	EP300	CLOCK	328572	12753	Ep300	Clock	0	0	1	1	0	0	1	0	0	ext	0.0181655	0	5.6	23	0	0.6	organ morphogenesis	circadian rhythm
1387	4862	CREBBP	NPAS2	12914	18143	Crebbp	Npas2	0	0	1	1	0	0	1	0	0	ext	0.000545079	0	3.6	0.9	0	1.8	chromatin organization	positive regulation of transcription from RNA polymerase II promoter
2033	4862	EP300	NPAS2	328572	18143	Ep300	Npas2	0	0	1	1	0	0	1	0	0	ext	0.0181655	0	5.6	0.9	0	1.6	organ morphogenesis	circadian rhythm
1387	4862	CREBBP	NPAS2	12914	18143	Crebbp	Npas2	0	0	1	1	0	0	1	0	0	ext	0.000545079	0	3.6	0.9	0	1.8	interspecies interaction between organisms	positive regulation of transcription from RNA polymerase II promoter
2034	56938	EPAS1	ARNTL2	13819	272322	Epas1	Arntl2	0	0	1	1	0	0	1	0	0	ext	0.239529	0.37551	7.4	16.5	0.398957	9.4	organ morphogenesis	circadian rhythm
1387	4862	CREBBP	NPAS2	12914	18143	Crebbp	Npas2	0	0	1	1	0	0	1	0	0	ext	0.000545079	0	3.6	0.9	0	1.8	homeostatic process	positive regulation of transcription from RNA polymerase II promoter
3091	5187	HIF1A	PER1	15251	18626	Hif1a	Per1	0	0	1	1	0	0	1	0	0	ext	0.00680597	0	9.6	17.7	0	11.4	organ morphogenesis	circadian rhythm
1387	4862	CREBBP	NPAS2	12914	18143	Crebbp	Npas2	0	0	1	1	0	0	1	0	0	ext	0.000545079	0	3.6	0.9	0	1.8	anatomical structure formation	positive regulation of transcription from RNA polymerase II promoter
1628	2033	DBP	EP300	13170	328572	Dbp	Ep300	0	0	1	1	0	1	0	0	0	ext	0	0.0181655	10.1	5.6	0	9.8	regulation of cell proliferation	positive regulation of transcription from RNA polymerase II promoter
1628	2033	DBP	EP300	13170	328572	Dbp	Ep300	0	0	1	1	0	1	0	0	0	ext	0	0.0181655	10.1	5.6	0	9.8	regulation of cell proliferation	chromatin modification
1628	2033	DBP	EP300	13170	328572	Dbp	Ep300	0	0	1	1	0	1	0	0	0	ext	0	0.0181655	10.1	5.6	0	9.8	regulation of cell proliferation	chromatin organization
1628	2033	DBP	EP300	13170	328572	Dbp	Ep300	0	0	1	1	0	1	0	0	0	ext	0	0.0181655	10.1	5.6	0	9.8	regulation of cell proliferation	interspecies interaction between organisms
1628	2033	DBP	EP300	13170	328572	Dbp	Ep300	0	0	1	1	0	1	0	0	0	ext	0	0.0181655	10.1	5.6	0	9.8	regulation of cell proliferation	organ morphogenesis
1628	2033	DBP	EP300	13170	328572	Dbp	Ep300	0	0	1	1	0	1	0	0	0	ext	0	0.0181655	10.1	5.6	0	9.8	regulation of cell proliferation	embryonic development
1628	2033	DBP	EP300	13170	328572	Dbp	Ep300	0	0	1	1	0	1	0	0	0	ext	0	0.0181655	10.1	5.6	0	9.8	regulation of cell proliferation	homeostatic process
1628	2033	DBP	EP300	13170	328572	Dbp	Ep300	0	0	1	1	0	1	0	0	0	ext	0	0.0181655	10.1	5.6	0	9.8	regulation of cell proliferation	positive regulation of molecular function
1628	2033	DBP	EP300	13170	328572	Dbp	Ep300	0	0	1	1	0	1	0	0	0	ext	0	0.0181655	10.1	5.6	0	9.8	regulation of cell proliferation	tissue development
1786	2146	DNMT1	EZH2	13433	14056	Dnmt1	Ezh2	0	0	1	1	0	0	1	0	0	ext	0.0169426	0.00842676	3	5.7	0.000863014	4	negative regulation of transcription from RNA polymerase II promoter	chromatin modification
1786	2146	DNMT1	EZH2	13433	14056	Dnmt1	Ezh2	0	0	1	1	0	0	1	0	0	ext	0.0169426	0.00842676	3	5.7	0.000863014	4	negative regulation of transcription from RNA polymerase II promoter	chromatin organization
1786	2146	DNMT1	EZH2	13433	14056	Dnmt1	Ezh2	0	0	1	1	0	0	1	0	0	ext	0.0169426	0.00842676	3	5.7	0.000863014	4	chromatin modification	chromatin modification
1786	2146	DNMT1	EZH2	13433	14056	Dnmt1	Ezh2	0	0	1	1	0	0	1	0	0	ext	0.0169426	0.00842676	3	5.7	0.000863014	4	chromatin modification	chromatin organization
1786	2146	DNMT1	EZH2	13433	14056	Dnmt1	Ezh2	0	0	1	1	0	0	1	0	0	ext	0.0169426	0.00842676	3	5.7	0.000863014	4	chromatin organization	chromatin modification
1786	2146	DNMT1	EZH2	13433	14056	Dnmt1	Ezh2	0	0	1	1	0	0	1	0	0	ext	0.0169426	0.00842676	3	5.7	0.000863014	4	chromatin organization	chromatin organization
1789	2146	DNMT3B	EZH2	13436	14056	Dnmt3b	Ezh2	0	0	1	1	0	0	1	0	0	ext	0	0.00842676	22.7	5.7	0	23.6	chromatin modification	chromatin modification
1789	2146	DNMT3B	EZH2	13436	14056	Dnmt3b	Ezh2	0	0	1	1	0	0	1	0	0	ext	0	0.00842676	22.7	5.7	0	23.6	chromatin modification	chromatin organization
1789	2146	DNMT3B	EZH2	13436	14056	Dnmt3b	Ezh2	0	0	1	1	0	0	1	0	0	ext	0	0.00842676	22.7	5.7	0	23.6	chromatin organization	chromatin modification
1789	2146	DNMT3B	EZH2	13436	14056	Dnmt3b	Ezh2	0	0	1	1	0	0	1	0	0	ext	0	0.00842676	22.7	5.7	0	23.6	chromatin organization	chromatin organization
1876	2146	E2F6	EZH2	50496	14056	E2f6	Ezh2	0	0	1	1	0	0	1	0	0	ext	0.205166	0.00842676	16.7	5.7	0.130822	6.2	negative regulation of transcription from RNA polymerase II promoter	chromatin modification
1876	2146	E2F6	EZH2	50496	14056	E2f6	Ezh2	0	0	1	1	0	0	1	0	0	ext	0.205166	0.00842676	16.7	5.7	0.130822	6.2	negative regulation of transcription from RNA polymerase II promoter	chromatin organization
1876	2146	E2F6	EZH2	50496	14056	E2f6	Ezh2	0	0	1	1	0	0	1	0	0	ext	0.205166	0.00842676	16.7	5.7	0.130822	6.2	mitotic cell cycle	chromatin modification
1876	2146	E2F6	EZH2	50496	14056	E2f6	Ezh2	0	0	1	1	0	0	1	0	0	ext	0.205166	0.00842676	16.7	5.7	0.130822	6.2	mitotic cell cycle	chromatin organization
6774	8553	STAT3	BHLHE40	20848	20893	Stat3	Bhlhb2	0	0	1	1	0	0	1	0	0	ext	0.00255469	0.000859098	3.2	12.4	0.177285	9.1	organ morphogenesis	circadian rhythm
2033	9575	EP300	CLOCK	328572	12753	Ep300	Clock	0	0	1	1	0	0	1	0	0	ext	0.0181655	0	5.6	23	0	0.6	positive regulation of transcription from RNA polymerase II promoter	positive regulation of transcription from RNA polymerase II promoter
2033	9575	EP300	CLOCK	328572	12753	Ep300	Clock	0	0	1	1	0	0	1	0	0	ext	0.0181655	0	5.6	23	0	0.6	positive regulation of molecular function	circadian rhythm
2033	9575	EP300	CLOCK	328572	12753	Ep300	Clock	0	0	1	1	0	0	1	0	0	ext	0.0181655	0	5.6	23	0	0.6	chromatin modification	positive regulation of transcription from RNA polymerase II promoter
2033	4862	EP300	NPAS2	328572	18143	Ep300	Npas2	0	0	1	1	0	0	1	0	0	ext	0.0181655	0	5.6	0.9	0	1.6	positive regulation of molecular function	circadian rhythm
2033	9575	EP300	CLOCK	328572	12753	Ep300	Clock	0	0	1	1	0	0	1	0	0	ext	0.0181655	0	5.6	23	0	0.6	chromatin organization	positive regulation of transcription from RNA polymerase II promoter
3091	5187	HIF1A	PER1	15251	18626	Hif1a	Per1	0	0	1	1	0	0	1	0	0	ext	0.00680597	0	9.6	17.7	0	11.4	positive regulation of molecular function	circadian rhythm
2033	9575	EP300	CLOCK	328572	12753	Ep300	Clock	0	0	1	1	0	0	1	0	0	ext	0.0181655	0	5.6	23	0	0.6	interspecies interaction between organisms	positive regulation of transcription from RNA polymerase II promoter
406	9575	ARNTL	CLOCK	11865	12753	Arntl	Clock	1	0	1	1	1	1	1	0	0	unihi.y2h	0	0	22.4	23	0	22.6	positive regulation of transcription from RNA polymerase II promoter	circadian rhythm
2033	9575	EP300	CLOCK	328572	12753	Ep300	Clock	0	0	1	1	0	0	1	0	0	ext	0.0181655	0	5.6	23	0	0.6	organ morphogenesis	positive regulation of transcription from RNA polymerase II promoter
406	4862	ARNTL	NPAS2	11865	18143	Arntl	Npas2	1	0	1	1	1	1	1	0	0	unihi.y2h	0	0	22.4	0.9	0	23.5	positive regulation of transcription from RNA polymerase II promoter	circadian rhythm
2033	9575	EP300	CLOCK	328572	12753	Ep300	Clock	0	0	1	1	0	0	1	0	0	ext	0.0181655	0	5.6	23	0	0.6	embryonic development	positive regulation of transcription from RNA polymerase II promoter
406	1407	ARNTL	CRY1	11865	12952	Arntl	Cry1	1	0	1	1	1	1	1	0	0	unihi.y2h	0	0	22.4	19.8	0	21.2	positive regulation of transcription from RNA polymerase II promoter	circadian rhythm
2033	9575	EP300	CLOCK	328572	12753	Ep300	Clock	0	0	1	1	0	0	1	0	0	ext	0.0181655	0	5.6	23	0	0.6	homeostatic process	positive regulation of transcription from RNA polymerase II promoter
406	1408	ARNTL	CRY2	11865	12953	Arntl	Cry2	1	0	1	0	1	1	1	0	0	y2h	0	0.0425479	22.4	9.2	0	22.5	positive regulation of transcription from RNA polymerase II promoter	circadian rhythm
2033	9575	EP300	CLOCK	328572	12753	Ep300	Clock	0	0	1	1	0	0	1	0	0	ext	0.0181655	0	5.6	23	0	0.6	positive regulation of molecular function	positive regulation of transcription from RNA polymerase II promoter
406	8553	ARNTL	BHLHE40	11865	20893	Arntl	Bhlhb2	1	0	1	1	1	1	1	0	0	unihi.y2h	0	0.000859098	22.4	12.4	0	21.5	positive regulation of transcription from RNA polymerase II promoter	circadian rhythm
2033	9575	EP300	CLOCK	328572	12753	Ep300	Clock	0	0	1	1	0	0	1	0	0	ext	0.0181655	0	5.6	23	0	0.6	tissue development	positive regulation of transcription from RNA polymerase II promoter
4862	9575	NPAS2	CLOCK	18143	12753	Npas2	Clock	1	0	1	0	1	1	1	0	0	y2h	0	0	0.9	23	0	0.3	positive regulation of transcription from RNA polymerase II promoter	circadian rhythm
2033	4862	EP300	NPAS2	328572	18143	Ep300	Npas2	0	0	1	1	0	0	1	0	0	ext	0.0181655	0	5.6	0.9	0	1.6	positive regulation of transcription from RNA polymerase II promoter	positive regulation of transcription from RNA polymerase II promoter
4862	8553	NPAS2	BHLHE40	18143	20893	Npas2	Bhlhb2	1	0	1	0	1	1	1	0	0	y2h	0	0.000859098	0.9	12.4	9.38628e-05	1.1	positive regulation of transcription from RNA polymerase II promoter	circadian rhythm
2033	4862	EP300	NPAS2	328572	18143	Ep300	Npas2	0	0	1	1	0	0	1	0	0	ext	0.0181655	0	5.6	0.9	0	1.6	chromatin modification	positive regulation of transcription from RNA polymerase II promoter
9575	56938	CLOCK	ARNTL2	12753	272322	Clock	Arntl2	0	0	1	1	1	1	1	0	0	unihi	0	0.37551	23	16.5	0	22.6	positive regulation of transcription from RNA polymerase II promoter	circadian rhythm
2033	4862	EP300	NPAS2	328572	18143	Ep300	Npas2	0	0	1	1	0	0	1	0	0	ext	0.0181655	0	5.6	0.9	0	1.6	chromatin organization	positive regulation of transcription from RNA polymerase II promoter
196	406	AHR	ARNTL	11622	11865	Ahr	Arntl	0	0	1	1	0	0	1	0	0	ext	0.0121611	0	4.8	22.4	0	22.8	positive regulation of transcription from RNA polymerase II promoter	circadian rhythm
2033	4862	EP300	NPAS2	328572	18143	Ep300	Npas2	0	0	1	1	0	0	1	0	0	ext	0.0181655	0	5.6	0.9	0	1.6	interspecies interaction between organisms	positive regulation of transcription from RNA polymerase II promoter
2033	9575	EP300	CLOCK	328572	12753	Ep300	Clock	0	0	1	1	0	0	1	0	0	ext	0.0181655	0	5.6	23	0	0.6	positive regulation of transcription from RNA polymerase II promoter	circadian rhythm
2033	4862	EP300	NPAS2	328572	18143	Ep300	Npas2	0	0	1	1	0	0	1	0	0	ext	0.0181655	0	5.6	0.9	0	1.6	organ morphogenesis	positive regulation of transcription from RNA polymerase II promoter
2033	4862	EP300	NPAS2	328572	18143	Ep300	Npas2	0	0	1	1	0	0	1	0	0	ext	0.0181655	0	5.6	0.9	0	1.6	positive regulation of transcription from RNA polymerase II promoter	circadian rhythm
2033	4862	EP300	NPAS2	328572	18143	Ep300	Npas2	0	0	1	1	0	0	1	0	0	ext	0.0181655	0	5.6	0.9	0	1.6	embryonic development	positive regulation of transcription from RNA polymerase II promoter
2034	56938	EPAS1	ARNTL2	13819	272322	Epas1	Arntl2	0	0	1	1	0	0	1	0	0	ext	0.239529	0.37551	7.4	16.5	0.398957	9.4	positive regulation of transcription from RNA polymerase II promoter	circadian rhythm
2033	4862	EP300	NPAS2	328572	18143	Ep300	Npas2	0	0	1	1	0	0	1	0	0	ext	0.0181655	0	5.6	0.9	0	1.6	homeostatic process	positive regulation of transcription from RNA polymerase II promoter
3091	5187	HIF1A	PER1	15251	18626	Hif1a	Per1	0	0	1	1	0	0	1	0	0	ext	0.00680597	0	9.6	17.7	0	11.4	positive regulation of transcription from RNA polymerase II promoter	circadian rhythm
2033	4862	EP300	NPAS2	328572	18143	Ep300	Npas2	0	0	1	1	0	0	1	0	0	ext	0.0181655	0	5.6	0.9	0	1.6	positive regulation of molecular function	positive regulation of transcription from RNA polymerase II promoter
1453	8864	CSNK1D	PER2	104318	18627	Csnk1d	Per2	1	0	1	1	1	1	1	1	0	unihi.y2h	0.029129	0	2.8	20.1	0	14	protein amino acid phosphorylation	circadian rhythm
2033	4862	EP300	NPAS2	328572	18143	Ep300	Npas2	0	0	1	1	0	0	1	0	0	ext	0.0181655	0	5.6	0.9	0	1.6	tissue development	positive regulation of transcription from RNA polymerase II promoter
2033	6095	EP300	RORA	328572	19883	Ep300	Rora	0	0	1	1	0	0	1	0	0	ext	0.0181655	3.89273e-05	5.6	21.9	0.0204969	2.6	positive regulation of transcription from RNA polymerase II promoter	positive regulation of transcription from RNA polymerase II promoter
2033	6095	EP300	RORA	328572	19883	Ep300	Rora	0	0	1	1	0	0	1	0	0	ext	0.0181655	3.89273e-05	5.6	21.9	0.0204969	2.6	positive regulation of transcription from RNA polymerase II promoter	anatomical structure formation
2033	6095	EP300	RORA	328572	19883	Ep300	Rora	0	0	1	1	0	0	1	0	0	ext	0.0181655	3.89273e-05	5.6	21.9	0.0204969	2.6	chromatin modification	positive regulation of transcription from RNA polymerase II promoter
2033	6095	EP300	RORA	328572	19883	Ep300	Rora	0	0	1	1	0	0	1	0	0	ext	0.0181655	3.89273e-05	5.6	21.9	0.0204969	2.6	chromatin modification	anatomical structure formation
2033	6095	EP300	RORA	328572	19883	Ep300	Rora	0	0	1	1	0	0	1	0	0	ext	0.0181655	3.89273e-05	5.6	21.9	0.0204969	2.6	chromatin organization	positive regulation of transcription from RNA polymerase II promoter
2033	6095	EP300	RORA	328572	19883	Ep300	Rora	0	0	1	1	0	0	1	0	0	ext	0.0181655	3.89273e-05	5.6	21.9	0.0204969	2.6	chromatin organization	anatomical structure formation
2033	6095	EP300	RORA	328572	19883	Ep300	Rora	0	0	1	1	0	0	1	0	0	ext	0.0181655	3.89273e-05	5.6	21.9	0.0204969	2.6	interspecies interaction between organisms	positive regulation of transcription from RNA polymerase II promoter
2033	6095	EP300	RORA	328572	19883	Ep300	Rora	0	0	1	1	0	0	1	0	0	ext	0.0181655	3.89273e-05	5.6	21.9	0.0204969	2.6	interspecies interaction between organisms	anatomical structure formation
2033	6095	EP300	RORA	328572	19883	Ep300	Rora	0	0	1	1	0	0	1	0	0	ext	0.0181655	3.89273e-05	5.6	21.9	0.0204969	2.6	organ morphogenesis	positive regulation of transcription from RNA polymerase II promoter
2033	6095	EP300	RORA	328572	19883	Ep300	Rora	0	0	1	1	0	0	1	0	0	ext	0.0181655	3.89273e-05	5.6	21.9	0.0204969	2.6	organ morphogenesis	anatomical structure formation
2033	6095	EP300	RORA	328572	19883	Ep300	Rora	0	0	1	1	0	0	1	0	0	ext	0.0181655	3.89273e-05	5.6	21.9	0.0204969	2.6	embryonic development	positive regulation of transcription from RNA polymerase II promoter
2033	6095	EP300	RORA	328572	19883	Ep300	Rora	0	0	1	1	0	0	1	0	0	ext	0.0181655	3.89273e-05	5.6	21.9	0.0204969	2.6	embryonic development	anatomical structure formation
2033	6095	EP300	RORA	328572	19883	Ep300	Rora	0	0	1	1	0	0	1	0	0	ext	0.0181655	3.89273e-05	5.6	21.9	0.0204969	2.6	homeostatic process	positive regulation of transcription from RNA polymerase II promoter
2033	6095	EP300	RORA	328572	19883	Ep300	Rora	0	0	1	1	0	0	1	0	0	ext	0.0181655	3.89273e-05	5.6	21.9	0.0204969	2.6	homeostatic process	anatomical structure formation
2033	6095	EP300	RORA	328572	19883	Ep300	Rora	0	0	1	1	0	0	1	0	0	ext	0.0181655	3.89273e-05	5.6	21.9	0.0204969	2.6	positive regulation of molecular function	positive regulation of transcription from RNA polymerase II promoter
2033	6095	EP300	RORA	328572	19883	Ep300	Rora	0	0	1	1	0	0	1	0	0	ext	0.0181655	3.89273e-05	5.6	21.9	0.0204969	2.6	positive regulation of molecular function	anatomical structure formation
2033	6095	EP300	RORA	328572	19883	Ep300	Rora	0	0	1	1	0	0	1	0	0	ext	0.0181655	3.89273e-05	5.6	21.9	0.0204969	2.6	tissue development	positive regulation of transcription from RNA polymerase II promoter
2033	6095	EP300	RORA	328572	19883	Ep300	Rora	0	0	1	1	0	0	1	0	0	ext	0.0181655	3.89273e-05	5.6	21.9	0.0204969	2.6	tissue development	anatomical structure formation
1454	9575	CSNK1E	CLOCK	27373	12753	Csnk1e	Clock	1	0	1	0	1	1	1	1	0	y2h	0.0768418	0	16.6	23	0	22.4	protein amino acid phosphorylation	circadian rhythm
2034	56938	EPAS1	ARNTL2	13819	272322	Epas1	Arntl2	0	0	1	1	0	0	1	0	0	ext	0.239529	0.37551	7.4	16.5	0.398957	9.4	positive regulation of transcription from RNA polymerase II promoter	response to external stimulus
1454	5187	CSNK1E	PER1	27373	18626	Csnk1e	Per1	1	0	1	1	1	1	1	1	0	unihi.y2h	0.0768418	0	16.6	17.7	0	12.4	protein amino acid phosphorylation	circadian rhythm
2034	56938	EPAS1	ARNTL2	13819	272322	Epas1	Arntl2	0	0	1	1	0	0	1	0	0	ext	0.239529	0.37551	7.4	16.5	0.398957	9.4	hemopoiesis	response to external stimulus
1454	8864	CSNK1E	PER2	27373	18627	Csnk1e	Per2	1	0	1	1	1	1	1	1	0	unihi.y2h	0.0768418	0	16.6	20.1	0	14.2	protein amino acid phosphorylation	circadian rhythm
2034	56938	EPAS1	ARNTL2	13819	272322	Epas1	Arntl2	0	0	1	1	0	0	1	0	0	ext	0.239529	0.37551	7.4	16.5	0.398957	9.4	hemopoietic or lymphoid organ development	response to external stimulus
1454	8553	CSNK1E	BHLHE40	27373	20893	Csnk1e	Bhlhb2	1	0	1	0	1	1	1	1	0	y2h	0.0768418	0.000859098	16.6	12.4	9.55882e-05	13	protein amino acid phosphorylation	circadian rhythm
2034	56938	EPAS1	ARNTL2	13819	272322	Epas1	Arntl2	0	0	1	1	0	0	1	0	0	ext	0.239529	0.37551	7.4	16.5	0.398957	9.4	immune system development	response to external stimulus
1457	8553	CSNK2A1	BHLHE40	12995	20893	Csnk2a1	Bhlhb2	1	0	1	0	1	1	1	1	0	y2h	0.000167929	0.000859098	6.5	12.4	0.000108772	10.8	protein amino acid phosphorylation	circadian rhythm
2034	56938	EPAS1	ARNTL2	13819	272322	Epas1	Arntl2	0	0	1	1	0	0	1	0	0	ext	0.239529	0.37551	7.4	16.5	0.398957	9.4	organ morphogenesis	response to external stimulus
1459	8553	CSNK2A2	BHLHE40	13000	20893	Csnk2a2	Bhlhb2	1	0	1	0	1	1	1	1	0	y2h	1.52749e-05	0.000859098	5.3	12.4	0.00189552	10.5	protein amino acid phosphorylation	circadian rhythm
2034	56938	EPAS1	ARNTL2	13819	272322	Epas1	Arntl2	0	0	1	1	0	0	1	0	0	ext	0.239529	0.37551	7.4	16.5	0.398957	9.4	embryonic development	response to external stimulus
2932	8553	GSK3B	BHLHE40	56637	20893	Gsk3b	Bhlhb2	1	0	1	0	1	1	1	1	0	y2h	0.0032	0.000859098	3.5	12.4	0.057205	10.3	protein amino acid phosphorylation	circadian rhythm
2034	56938	EPAS1	ARNTL2	13819	272322	Epas1	Arntl2	0	0	1	1	0	0	1	0	0	ext	0.239529	0.37551	7.4	16.5	0.398957	9.4	homeostatic process	response to external stimulus
5515	8553	PPP2CA	BHLHE40	19052	20893	Ppp2ca	Bhlhb2	1	0	1	0	1	1	1	1	0	y2h	0.023019	0.000859098	9.1	12.4	3.84615e-05	11.9	protein amino acid phosphorylation	circadian rhythm
2034	56938	EPAS1	ARNTL2	13819	272322	Epas1	Arntl2	0	0	1	1	0	0	1	0	0	ext	0.239529	0.37551	7.4	16.5	0.398957	9.4	anatomical structure formation	response to external stimulus
2146	3065	EZH2	HDAC1	14056	433759	Ezh2	Hdac1	0	0	1	1	0	1	0	0	0	ext	0.00842676	0.861671	5.7	11.7	0.00414754	5.9	chromatin modification	positive regulation of transcription from RNA polymerase II promoter
2146	3065	EZH2	HDAC1	14056	433759	Ezh2	Hdac1	0	0	1	1	0	1	0	0	0	ext	0.00842676	0.861671	5.7	11.7	0.00414754	5.9	chromatin modification	chromatin modification
2146	3065	EZH2	HDAC1	14056	433759	Ezh2	Hdac1	0	0	1	1	0	1	0	0	0	ext	0.00842676	0.861671	5.7	11.7	0.00414754	5.9	chromatin modification	chromatin organization
2146	3065	EZH2	HDAC1	14056	433759	Ezh2	Hdac1	0	0	1	1	0	1	0	0	0	ext	0.00842676	0.861671	5.7	11.7	0.00414754	5.9	chromatin modification	interspecies interaction between organisms
2146	3065	EZH2	HDAC1	14056	433759	Ezh2	Hdac1	0	0	1	1	0	1	0	0	0	ext	0.00842676	0.861671	5.7	11.7	0.00414754	5.9	chromatin modification	regulation of cell proliferation
2146	3065	EZH2	HDAC1	14056	433759	Ezh2	Hdac1	0	0	1	1	0	1	0	0	0	ext	0.00842676	0.861671	5.7	11.7	0.00414754	5.9	chromatin modification	negative regulation of developmental process
2146	3065	EZH2	HDAC1	14056	433759	Ezh2	Hdac1	0	0	1	1	0	1	0	0	0	ext	0.00842676	0.861671	5.7	11.7	0.00414754	5.9	chromatin organization	positive regulation of transcription from RNA polymerase II promoter
2146	3065	EZH2	HDAC1	14056	433759	Ezh2	Hdac1	0	0	1	1	0	1	0	0	0	ext	0.00842676	0.861671	5.7	11.7	0.00414754	5.9	chromatin organization	chromatin modification
2146	3065	EZH2	HDAC1	14056	433759	Ezh2	Hdac1	0	0	1	1	0	1	0	0	0	ext	0.00842676	0.861671	5.7	11.7	0.00414754	5.9	chromatin organization	chromatin organization
2146	3065	EZH2	HDAC1	14056	433759	Ezh2	Hdac1	0	0	1	1	0	1	0	0	0	ext	0.00842676	0.861671	5.7	11.7	0.00414754	5.9	chromatin organization	interspecies interaction between organisms
2146	3065	EZH2	HDAC1	14056	433759	Ezh2	Hdac1	0	0	1	1	0	1	0	0	0	ext	0.00842676	0.861671	5.7	11.7	0.00414754	5.9	chromatin organization	regulation of cell proliferation
2146	3065	EZH2	HDAC1	14056	433759	Ezh2	Hdac1	0	0	1	1	0	1	0	0	0	ext	0.00842676	0.861671	5.7	11.7	0.00414754	5.9	chromatin organization	negative regulation of developmental process
2146	3066	EZH2	HDAC2	14056	15182	Ezh2	Hdac2	0	0	1	1	0	1	0	0	0	ext	0.00842676	0.429276	5.7	2.2	0.0163512	4.6	chromatin modification	positive regulation of transcription from RNA polymerase II promoter
2146	3066	EZH2	HDAC2	14056	15182	Ezh2	Hdac2	0	0	1	1	0	1	0	0	0	ext	0.00842676	0.429276	5.7	2.2	0.0163512	4.6	chromatin modification	negative regulation of transcription from RNA polymerase II promoter
2146	3066	EZH2	HDAC2	14056	15182	Ezh2	Hdac2	0	0	1	1	0	1	0	0	0	ext	0.00842676	0.429276	5.7	2.2	0.0163512	4.6	chromatin modification	chromatin modification
2146	3066	EZH2	HDAC2	14056	15182	Ezh2	Hdac2	0	0	1	1	0	1	0	0	0	ext	0.00842676	0.429276	5.7	2.2	0.0163512	4.6	chromatin modification	chromatin organization
2146	3066	EZH2	HDAC2	14056	15182	Ezh2	Hdac2	0	0	1	1	0	1	0	0	0	ext	0.00842676	0.429276	5.7	2.2	0.0163512	4.6	chromatin modification	regulation of cell proliferation
2146	3066	EZH2	HDAC2	14056	15182	Ezh2	Hdac2	0	0	1	1	0	1	0	0	0	ext	0.00842676	0.429276	5.7	2.2	0.0163512	4.6	chromatin organization	positive regulation of transcription from RNA polymerase II promoter
2146	3066	EZH2	HDAC2	14056	15182	Ezh2	Hdac2	0	0	1	1	0	1	0	0	0	ext	0.00842676	0.429276	5.7	2.2	0.0163512	4.6	chromatin organization	negative regulation of transcription from RNA polymerase II promoter
2146	3066	EZH2	HDAC2	14056	15182	Ezh2	Hdac2	0	0	1	1	0	1	0	0	0	ext	0.00842676	0.429276	5.7	2.2	0.0163512	4.6	chromatin organization	chromatin modification
2146	3066	EZH2	HDAC2	14056	15182	Ezh2	Hdac2	0	0	1	1	0	1	0	0	0	ext	0.00842676	0.429276	5.7	2.2	0.0163512	4.6	chromatin organization	chromatin organization
2146	3066	EZH2	HDAC2	14056	15182	Ezh2	Hdac2	0	0	1	1	0	1	0	0	0	ext	0.00842676	0.429276	5.7	2.2	0.0163512	4.6	chromatin organization	regulation of cell proliferation
2146	5371	EZH2	PML	14056	18854	Ezh2	Pml	0	0	1	1	0	1	0	0	0	ext	0.00842676	0.00693462	5.7	2.2	0.000135593	4	chromatin modification	interspecies interaction between organisms
2146	5371	EZH2	PML	14056	18854	Ezh2	Pml	0	0	1	1	0	1	0	0	0	ext	0.00842676	0.00693462	5.7	2.2	0.000135593	4	chromatin modification	hemopoiesis
2146	5371	EZH2	PML	14056	18854	Ezh2	Pml	0	0	1	1	0	1	0	0	0	ext	0.00842676	0.00693462	5.7	2.2	0.000135593	4	chromatin modification	hemopoietic or lymphoid organ development
2146	5371	EZH2	PML	14056	18854	Ezh2	Pml	0	0	1	1	0	1	0	0	0	ext	0.00842676	0.00693462	5.7	2.2	0.000135593	4	chromatin modification	immune system development
2146	5371	EZH2	PML	14056	18854	Ezh2	Pml	0	0	1	1	0	1	0	0	0	ext	0.00842676	0.00693462	5.7	2.2	0.000135593	4	chromatin modification	regulation of cell proliferation
2146	5371	EZH2	PML	14056	18854	Ezh2	Pml	0	0	1	1	0	1	0	0	0	ext	0.00842676	0.00693462	5.7	2.2	0.000135593	4	chromatin modification	response to organic substance
2146	5371	EZH2	PML	14056	18854	Ezh2	Pml	0	0	1	1	0	1	0	0	0	ext	0.00842676	0.00693462	5.7	2.2	0.000135593	4	chromatin modification	organ morphogenesis
2146	5371	EZH2	PML	14056	18854	Ezh2	Pml	0	0	1	1	0	1	0	0	0	ext	0.00842676	0.00693462	5.7	2.2	0.000135593	4	chromatin modification	mitotic cell cycle
2146	5371	EZH2	PML	14056	18854	Ezh2	Pml	0	0	1	1	0	1	0	0	0	ext	0.00842676	0.00693462	5.7	2.2	0.000135593	4	chromatin modification	protein amino acid phosphorylation
2146	5371	EZH2	PML	14056	18854	Ezh2	Pml	0	0	1	1	0	1	0	0	0	ext	0.00842676	0.00693462	5.7	2.2	0.000135593	4	chromatin modification	intracellular signaling cascade
2146	5371	EZH2	PML	14056	18854	Ezh2	Pml	0	0	1	1	0	1	0	0	0	ext	0.00842676	0.00693462	5.7	2.2	0.000135593	4	chromatin modification	positive regulation of molecular function
2146	5371	EZH2	PML	14056	18854	Ezh2	Pml	0	0	1	1	0	1	0	0	0	ext	0.00842676	0.00693462	5.7	2.2	0.000135593	4	chromatin modification	negative regulation of developmental process
2146	5371	EZH2	PML	14056	18854	Ezh2	Pml	0	0	1	1	0	1	0	0	0	ext	0.00842676	0.00693462	5.7	2.2	0.000135593	4	chromatin modification	cell surface receptor linked signal transduction
2146	5371	EZH2	PML	14056	18854	Ezh2	Pml	0	0	1	1	0	1	0	0	0	ext	0.00842676	0.00693462	5.7	2.2	0.000135593	4	chromatin modification	anatomical structure formation
2146	5371	EZH2	PML	14056	18854	Ezh2	Pml	0	0	1	1	0	1	0	0	0	ext	0.00842676	0.00693462	5.7	2.2	0.000135593	4	chromatin organization	interspecies interaction between organisms
2146	5371	EZH2	PML	14056	18854	Ezh2	Pml	0	0	1	1	0	1	0	0	0	ext	0.00842676	0.00693462	5.7	2.2	0.000135593	4	chromatin organization	hemopoiesis
2146	5371	EZH2	PML	14056	18854	Ezh2	Pml	0	0	1	1	0	1	0	0	0	ext	0.00842676	0.00693462	5.7	2.2	0.000135593	4	chromatin organization	hemopoietic or lymphoid organ development
2146	5371	EZH2	PML	14056	18854	Ezh2	Pml	0	0	1	1	0	1	0	0	0	ext	0.00842676	0.00693462	5.7	2.2	0.000135593	4	chromatin organization	immune system development
2146	5371	EZH2	PML	14056	18854	Ezh2	Pml	0	0	1	1	0	1	0	0	0	ext	0.00842676	0.00693462	5.7	2.2	0.000135593	4	chromatin organization	regulation of cell proliferation
2146	5371	EZH2	PML	14056	18854	Ezh2	Pml	0	0	1	1	0	1	0	0	0	ext	0.00842676	0.00693462	5.7	2.2	0.000135593	4	chromatin organization	response to organic substance
2146	5371	EZH2	PML	14056	18854	Ezh2	Pml	0	0	1	1	0	1	0	0	0	ext	0.00842676	0.00693462	5.7	2.2	0.000135593	4	chromatin organization	organ morphogenesis
2146	5371	EZH2	PML	14056	18854	Ezh2	Pml	0	0	1	1	0	1	0	0	0	ext	0.00842676	0.00693462	5.7	2.2	0.000135593	4	chromatin organization	mitotic cell cycle
2146	5371	EZH2	PML	14056	18854	Ezh2	Pml	0	0	1	1	0	1	0	0	0	ext	0.00842676	0.00693462	5.7	2.2	0.000135593	4	chromatin organization	protein amino acid phosphorylation
2146	5371	EZH2	PML	14056	18854	Ezh2	Pml	0	0	1	1	0	1	0	0	0	ext	0.00842676	0.00693462	5.7	2.2	0.000135593	4	chromatin organization	intracellular signaling cascade
2146	5371	EZH2	PML	14056	18854	Ezh2	Pml	0	0	1	1	0	1	0	0	0	ext	0.00842676	0.00693462	5.7	2.2	0.000135593	4	chromatin organization	positive regulation of molecular function
2146	5371	EZH2	PML	14056	18854	Ezh2	Pml	0	0	1	1	0	1	0	0	0	ext	0.00842676	0.00693462	5.7	2.2	0.000135593	4	chromatin organization	negative regulation of developmental process
2146	5371	EZH2	PML	14056	18854	Ezh2	Pml	0	0	1	1	0	1	0	0	0	ext	0.00842676	0.00693462	5.7	2.2	0.000135593	4	chromatin organization	cell surface receptor linked signal transduction
2146	5371	EZH2	PML	14056	18854	Ezh2	Pml	0	0	1	1	0	1	0	0	0	ext	0.00842676	0.00693462	5.7	2.2	0.000135593	4	chromatin organization	anatomical structure formation
2146	5914	EZH2	RARA	14056	19401	Ezh2	Rara	0	0	1	1	0	1	0	0	0	ext	0.00842676	0.329247	5.7	18	0.209317	5.5	chromatin modification	hemopoiesis
2146	5914	EZH2	RARA	14056	19401	Ezh2	Rara	0	0	1	1	0	1	0	0	0	ext	0.00842676	0.329247	5.7	18	0.209317	5.5	chromatin modification	hemopoietic or lymphoid organ development
2146	5914	EZH2	RARA	14056	19401	Ezh2	Rara	0	0	1	1	0	1	0	0	0	ext	0.00842676	0.329247	5.7	18	0.209317	5.5	chromatin modification	immune system development
2146	5914	EZH2	RARA	14056	19401	Ezh2	Rara	0	0	1	1	0	1	0	0	0	ext	0.00842676	0.329247	5.7	18	0.209317	5.5	chromatin modification	response to organic substance
2146	5914	EZH2	RARA	14056	19401	Ezh2	Rara	0	0	1	1	0	1	0	0	0	ext	0.00842676	0.329247	5.7	18	0.209317	5.5	chromatin modification	intracellular signaling cascade
2146	5914	EZH2	RARA	14056	19401	Ezh2	Rara	0	0	1	1	0	1	0	0	0	ext	0.00842676	0.329247	5.7	18	0.209317	5.5	chromatin modification	negative regulation of developmental process
2146	5914	EZH2	RARA	14056	19401	Ezh2	Rara	0	0	1	1	0	1	0	0	0	ext	0.00842676	0.329247	5.7	18	0.209317	5.5	chromatin modification	response to external stimulus
2146	5914	EZH2	RARA	14056	19401	Ezh2	Rara	0	0	1	1	0	1	0	0	0	ext	0.00842676	0.329247	5.7	18	0.209317	5.5	chromatin organization	hemopoiesis
2146	5914	EZH2	RARA	14056	19401	Ezh2	Rara	0	0	1	1	0	1	0	0	0	ext	0.00842676	0.329247	5.7	18	0.209317	5.5	chromatin organization	hemopoietic or lymphoid organ development
2146	5914	EZH2	RARA	14056	19401	Ezh2	Rara	0	0	1	1	0	1	0	0	0	ext	0.00842676	0.329247	5.7	18	0.209317	5.5	chromatin organization	immune system development
2146	5914	EZH2	RARA	14056	19401	Ezh2	Rara	0	0	1	1	0	1	0	0	0	ext	0.00842676	0.329247	5.7	18	0.209317	5.5	chromatin organization	response to organic substance
2146	5914	EZH2	RARA	14056	19401	Ezh2	Rara	0	0	1	1	0	1	0	0	0	ext	0.00842676	0.329247	5.7	18	0.209317	5.5	chromatin organization	intracellular signaling cascade
2146	5914	EZH2	RARA	14056	19401	Ezh2	Rara	0	0	1	1	0	1	0	0	0	ext	0.00842676	0.329247	5.7	18	0.209317	5.5	chromatin organization	negative regulation of developmental process
2146	5914	EZH2	RARA	14056	19401	Ezh2	Rara	0	0	1	1	0	1	0	0	0	ext	0.00842676	0.329247	5.7	18	0.209317	5.5	chromatin organization	response to external stimulus
2146	7409	EZH2	VAV1	14056	22324	Ezh2	Vav1	0	0	1	1	0	1	0	0	0	ext	0.00842676	0.626097	5.7	21.9	0.0698866	4.6	chromatin modification	intracellular signaling cascade
2146	7409	EZH2	VAV1	14056	22324	Ezh2	Vav1	0	0	1	1	0	1	0	0	0	ext	0.00842676	0.626097	5.7	21.9	0.0698866	4.6	chromatin modification	cell surface receptor linked signal transduction
2146	7409	EZH2	VAV1	14056	22324	Ezh2	Vav1	0	0	1	1	0	1	0	0	0	ext	0.00842676	0.626097	5.7	21.9	0.0698866	4.6	chromatin organization	intracellular signaling cascade
2146	7409	EZH2	VAV1	14056	22324	Ezh2	Vav1	0	0	1	1	0	1	0	0	0	ext	0.00842676	0.626097	5.7	21.9	0.0698866	4.6	chromatin organization	cell surface receptor linked signal transduction
2146	8726	EZH2	EED	14056	13626	Ezh2	Eed	0	0	1	1	0	1	0	0	0	ext	0.00842676	0.0430571	5.7	7.5	0.000390909	6.2	chromatin modification	chromatin modification
2146	8726	EZH2	EED	14056	13626	Ezh2	Eed	0	0	1	1	0	1	0	0	0	ext	0.00842676	0.0430571	5.7	7.5	0.000390909	6.2	chromatin modification	chromatin organization
2146	8726	EZH2	EED	14056	13626	Ezh2	Eed	0	0	1	1	0	1	0	0	0	ext	0.00842676	0.0430571	5.7	7.5	0.000390909	6.2	chromatin organization	chromatin modification
2146	8726	EZH2	EED	14056	13626	Ezh2	Eed	0	0	1	1	0	1	0	0	0	ext	0.00842676	0.0430571	5.7	7.5	0.000390909	6.2	chromatin organization	chromatin organization
2146	23512	EZH2	SUZ12	14056	52615	Ezh2	Suz12	0	0	1	1	0	1	0	0	0	ext	0.00842676	0.00550786	5.7	5	0.000109155	5.4	chromatin modification	chromatin modification
2146	23512	EZH2	SUZ12	14056	52615	Ezh2	Suz12	0	0	1	1	0	1	0	0	0	ext	0.00842676	0.00550786	5.7	5	0.000109155	5.4	chromatin modification	chromatin organization
2146	23512	EZH2	SUZ12	14056	52615	Ezh2	Suz12	0	0	1	1	0	1	0	0	0	ext	0.00842676	0.00550786	5.7	5	0.000109155	5.4	chromatin organization	chromatin modification
2146	23512	EZH2	SUZ12	14056	52615	Ezh2	Suz12	0	0	1	1	0	1	0	0	0	ext	0.00842676	0.00550786	5.7	5	0.000109155	5.4	chromatin organization	chromatin organization
2146	5252	EZH2	PHF1	14056	21652	Ezh2	Phf1	0	0	1	1	0	1	0	0	0	ext	0.00842676	0.141383	5.7	5.8	0.000383436	5.8	chromatin modification	chromatin modification
2146	5252	EZH2	PHF1	14056	21652	Ezh2	Phf1	0	0	1	1	0	1	0	0	0	ext	0.00842676	0.141383	5.7	5.8	0.000383436	5.8	chromatin modification	chromatin organization
2146	5252	EZH2	PHF1	14056	21652	Ezh2	Phf1	0	0	1	1	0	1	0	0	0	ext	0.00842676	0.141383	5.7	5.8	0.000383436	5.8	chromatin organization	chromatin modification
2146	5252	EZH2	PHF1	14056	21652	Ezh2	Phf1	0	0	1	1	0	1	0	0	0	ext	0.00842676	0.141383	5.7	5.8	0.000383436	5.8	chromatin organization	chromatin organization
2770	51655	GNAI1	RASD1	14677	19416	Gnai1	Rasd1	0	0	1	1	0	0	1	0	0	ext	0.00251766	0.233067	10.9	15.8	0.00342926	12.1	cell surface receptor linked signal transduction	intracellular signaling cascade
2770	51655	GNAI1	RASD1	14677	19416	Gnai1	Rasd1	0	0	1	1	0	0	1	0	0	ext	0.00251766	0.233067	10.9	15.8	0.00342926	12.1	cell surface receptor linked signal transduction	cell surface receptor linked signal transduction
2771	51655	GNAI2	RASD1	14678	19416	Gnai2	Rasd1	0	0	1	1	0	0	1	0	0	ext	0.0206226	0.233067	4.7	15.8	0.560849	6.2	regulation of cell proliferation	intracellular signaling cascade
2771	51655	GNAI2	RASD1	14678	19416	Gnai2	Rasd1	0	0	1	1	0	0	1	0	0	ext	0.0206226	0.233067	4.7	15.8	0.560849	6.2	regulation of cell proliferation	cell surface receptor linked signal transduction
2771	51655	GNAI2	RASD1	14678	19416	Gnai2	Rasd1	0	0	1	1	0	0	1	0	0	ext	0.0206226	0.233067	4.7	15.8	0.560849	6.2	protein amino acid phosphorylation	intracellular signaling cascade
2771	51655	GNAI2	RASD1	14678	19416	Gnai2	Rasd1	0	0	1	1	0	0	1	0	0	ext	0.0206226	0.233067	4.7	15.8	0.560849	6.2	protein amino acid phosphorylation	cell surface receptor linked signal transduction
2771	51655	GNAI2	RASD1	14678	19416	Gnai2	Rasd1	0	0	1	1	0	0	1	0	0	ext	0.0206226	0.233067	4.7	15.8	0.560849	6.2	intracellular signaling cascade	intracellular signaling cascade
2771	51655	GNAI2	RASD1	14678	19416	Gnai2	Rasd1	0	0	1	1	0	0	1	0	0	ext	0.0206226	0.233067	4.7	15.8	0.560849	6.2	intracellular signaling cascade	cell surface receptor linked signal transduction
2771	51655	GNAI2	RASD1	14678	19416	Gnai2	Rasd1	0	0	1	1	0	0	1	0	0	ext	0.0206226	0.233067	4.7	15.8	0.560849	6.2	positive regulation of molecular function	intracellular signaling cascade
2771	51655	GNAI2	RASD1	14678	19416	Gnai2	Rasd1	0	0	1	1	0	0	1	0	0	ext	0.0206226	0.233067	4.7	15.8	0.560849	6.2	positive regulation of molecular function	cell surface receptor linked signal transduction
2771	51655	GNAI2	RASD1	14678	19416	Gnai2	Rasd1	0	0	1	1	0	0	1	0	0	ext	0.0206226	0.233067	4.7	15.8	0.560849	6.2	response to external stimulus	intracellular signaling cascade
2771	51655	GNAI2	RASD1	14678	19416	Gnai2	Rasd1	0	0	1	1	0	0	1	0	0	ext	0.0206226	0.233067	4.7	15.8	0.560849	6.2	response to external stimulus	cell surface receptor linked signal transduction
2771	51655	GNAI2	RASD1	14678	19416	Gnai2	Rasd1	0	0	1	1	0	0	1	0	0	ext	0.0206226	0.233067	4.7	15.8	0.560849	6.2	cell surface receptor linked signal transduction	intracellular signaling cascade
2771	51655	GNAI2	RASD1	14678	19416	Gnai2	Rasd1	0	0	1	1	0	0	1	0	0	ext	0.0206226	0.233067	4.7	15.8	0.560849	6.2	cell surface receptor linked signal transduction	cell surface receptor linked signal transduction
2782	51655	GNB1	RASD1	14688	19416	Gnb1	Rasd1	0	0	1	1	0	0	1	0	0	ext	0.130787	0.233067	17.9	15.8	0.0283798	16.9	response to organic substance	intracellular signaling cascade
2782	51655	GNB1	RASD1	14688	19416	Gnb1	Rasd1	0	0	1	1	0	0	1	0	0	ext	0.130787	0.233067	17.9	15.8	0.0283798	16.9	response to organic substance	cell surface receptor linked signal transduction
2782	51655	GNB1	RASD1	14688	19416	Gnb1	Rasd1	0	0	1	1	0	0	1	0	0	ext	0.130787	0.233067	17.9	15.8	0.0283798	16.9	homeostatic process	intracellular signaling cascade
2782	51655	GNB1	RASD1	14688	19416	Gnb1	Rasd1	0	0	1	1	0	0	1	0	0	ext	0.130787	0.233067	17.9	15.8	0.0283798	16.9	homeostatic process	cell surface receptor linked signal transduction
2782	51655	GNB1	RASD1	14688	19416	Gnb1	Rasd1	0	0	1	1	0	0	1	0	0	ext	0.130787	0.233067	17.9	15.8	0.0283798	16.9	intracellular signaling cascade	intracellular signaling cascade
2782	51655	GNB1	RASD1	14688	19416	Gnb1	Rasd1	0	0	1	1	0	0	1	0	0	ext	0.130787	0.233067	17.9	15.8	0.0283798	16.9	intracellular signaling cascade	cell surface receptor linked signal transduction
2782	51655	GNB1	RASD1	14688	19416	Gnb1	Rasd1	0	0	1	1	0	0	1	0	0	ext	0.130787	0.233067	17.9	15.8	0.0283798	16.9	positive regulation of molecular function	intracellular signaling cascade
2782	51655	GNB1	RASD1	14688	19416	Gnb1	Rasd1	0	0	1	1	0	0	1	0	0	ext	0.130787	0.233067	17.9	15.8	0.0283798	16.9	positive regulation of molecular function	cell surface receptor linked signal transduction
2782	51655	GNB1	RASD1	14688	19416	Gnb1	Rasd1	0	0	1	1	0	0	1	0	0	ext	0.130787	0.233067	17.9	15.8	0.0283798	16.9	cell surface receptor linked signal transduction	intracellular signaling cascade
2782	51655	GNB1	RASD1	14688	19416	Gnb1	Rasd1	0	0	1	1	0	0	1	0	0	ext	0.130787	0.233067	17.9	15.8	0.0283798	16.9	cell surface receptor linked signal transduction	cell surface receptor linked signal transduction
5518	8553	PPP2R1A	BHLHE40	51792	20893	Ppp2r1a	Bhlhb2	1	0	1	0	1	1	1	1	0	y2h	0.000944137	0.000859098	3.7	12.4	0.029	10.6	protein amino acid phosphorylation	circadian rhythm
3091	5187	HIF1A	PER1	15251	18626	Hif1a	Per1	0	0	1	1	0	0	1	0	0	ext	0.00680597	0	9.6	17.7	0	11.4	positive regulation of transcription from RNA polymerase II promoter	response to external stimulus
2932	8864	GSK3B	PER2	56637	18627	Gsk3b	Per2	0	1	0	0	1	1	1	1	0	man	0.0032	0	3.5	20.1	0	13.7	protein amino acid phosphorylation	circadian rhythm
3091	5187	HIF1A	PER1	15251	18626	Hif1a	Per1	0	0	1	1	0	0	1	0	0	ext	0.00680597	0	9.6	17.7	0	11.4	hemopoiesis	response to external stimulus
1457	8864	CSNK2A1	PER2	12995	18627	Csnk2a1	Per2	0	1	0	0	1	1	1	1	0	man	0.000167929	0	6.5	20.1	0	13.5	protein amino acid phosphorylation	circadian rhythm
3091	5187	HIF1A	PER1	15251	18626	Hif1a	Per1	0	0	1	1	0	0	1	0	0	ext	0.00680597	0	9.6	17.7	0	11.4	hemopoietic or lymphoid organ development	response to external stimulus
5578	8864	PRKCA	PER2	18750	18627	Prkca	Per2	0	1	0	0	1	1	1	1	0	man	0.00678513	0	7.5	20.1	0	13.6	protein amino acid phosphorylation	circadian rhythm
3091	5187	HIF1A	PER1	15251	18626	Hif1a	Per1	0	0	1	1	0	0	1	0	0	ext	0.00680597	0	9.6	17.7	0	11.4	immune system development	response to external stimulus
2932	9572	GSK3B	NR1D1	56637	217166	Gsk3b	Nr1d1	0	1	0	0	1	1	1	1	0	man	0.0032	0	3.5	6.8	0	6.3	protein amino acid phosphorylation	circadian rhythm
3091	5187	HIF1A	PER1	15251	18626	Hif1a	Per1	0	0	1	1	0	0	1	0	0	ext	0.00680597	0	9.6	17.7	0	11.4	regulation of cell proliferation	response to external stimulus
1453	5187	CSNK1D	PER1	104318	18626	Csnk1d	Per1	0	0	1	1	1	1	1	1	0	unihi	0.029129	0	2.8	17.7	0.000747899	10.8	protein amino acid phosphorylation	circadian rhythm
3091	5187	HIF1A	PER1	15251	18626	Hif1a	Per1	0	0	1	1	0	0	1	0	0	ext	0.00680597	0	9.6	17.7	0	11.4	organ morphogenesis	response to external stimulus
1111	8914	CHEK1	TIMELESS	12649	21853	Chek1	Timeless	0	0	1	1	0	0	1	0	0	ext	0.0379367	0.300916	12	19.6	0.12388	14.8	protein amino acid phosphorylation	circadian rhythm
3091	5187	HIF1A	PER1	15251	18626	Hif1a	Per1	0	0	1	1	0	0	1	0	0	ext	0.00680597	0	9.6	17.7	0	11.4	embryonic development	response to external stimulus
7329	8553	UBE2I	BHLHE40	22196	20893	Ube2i	Bhlhb2	0	0	1	1	0	0	1	0	0	ext	0.000613374	0.000859098	5.1	12.4	0.00408706	10.8	proteolysis involved in cellular protein catabolic process	circadian rhythm
3091	5187	HIF1A	PER1	15251	18626	Hif1a	Per1	0	0	1	1	0	0	1	0	0	ext	0.00680597	0	9.6	17.7	0	11.4	homeostatic process	response to external stimulus
1628	9575	DBP	CLOCK	13170	12753	Dbp	Clock	1	0	1	0	1	1	1	0	0	y2h	0	0	10.1	23	0	9.9	regulation of cell proliferation	circadian rhythm
3091	5187	HIF1A	PER1	15251	18626	Hif1a	Per1	0	0	1	1	0	0	1	0	0	ext	0.00680597	0	9.6	17.7	0	11.4	positive regulation of molecular function	response to external stimulus
5578	8864	PRKCA	PER2	18750	18627	Prkca	Per2	0	1	0	0	1	1	1	1	0	man	0.00678513	0	7.5	20.1	0	13.6	regulation of cell proliferation	circadian rhythm
3091	5187	HIF1A	PER1	15251	18626	Hif1a	Per1	0	0	1	1	0	0	1	0	0	ext	0.00680597	0	9.6	17.7	0	11.4	tissue development	response to external stimulus
1111	8914	CHEK1	TIMELESS	12649	21853	Chek1	Timeless	0	0	1	1	0	0	1	0	0	ext	0.0379367	0.300916	12	19.6	0.12388	14.8	regulation of cell proliferation	circadian rhythm
3091	5187	HIF1A	PER1	15251	18626	Hif1a	Per1	0	0	1	1	0	0	1	0	0	ext	0.00680597	0	9.6	17.7	0	11.4	response to external stimulus	response to external stimulus
3091	5187	HIF1A	PER1	15251	18626	Hif1a	Per1	0	0	1	1	0	0	1	0	0	ext	0.00680597	0	9.6	17.7	0	11.4	regulation of cell proliferation	circadian rhythm
3091	5187	HIF1A	PER1	15251	18626	Hif1a	Per1	0	0	1	1	0	0	1	0	0	ext	0.00680597	0	9.6	17.7	0	11.4	cell surface receptor linked signal transduction	response to external stimulus
8850	9575	KAT2B	CLOCK	18519	12753	Kat2b	Clock	0	0	1	1	0	0	1	0	0	ext	0	0	8.4	23	0	0.3	regulation of cell proliferation	circadian rhythm
3091	5187	HIF1A	PER1	15251	18626	Hif1a	Per1	0	0	1	1	0	0	1	0	0	ext	0.00680597	0	9.6	17.7	0	11.4	anatomical structure formation	response to external stimulus
5187	8553	PER1	BHLHE40	18626	20893	Per1	Bhlhb2	1	0	1	0	1	1	1	0	0	y2h	0	0.000859098	17.7	12.4	0	11.9	response to external stimulus	circadian rhythm
3320	4862	HSP90AA1	NPAS2	15519	18143	Hsp90aa1	Npas2	0	0	1	1	0	0	1	0	0	ext	0	0	19.2	0.9	0	23.5	response to organic substance	positive regulation of transcription from RNA polymerase II promoter
8553	9575	BHLHE40	CLOCK	20893	12753	Bhlhb2	Clock	1	0	1	0	1	1	1	0	0	y2h	0.000859098	0	12.4	23	0.0452461	19.8	response to external stimulus	circadian rhythm
3320	4862	HSP90AA1	NPAS2	15519	18143	Hsp90aa1	Npas2	0	0	1	1	0	0	1	0	0	ext	0	0	19.2	0.9	0	23.5	anatomical structure formation	positive regulation of transcription from RNA polymerase II promoter
4654	79365	MYOD1	BHLHE41	17927	79362	Myod1	Bhlhb3	0	0	1	1	0	0	1	0	0	ext	0.22824	0.0861876	14.9	15.2	0.00988248	15.1	positive regulation of transcription from RNA polymerase II promoter	organ morphogenesis
4654	79365	MYOD1	BHLHE41	17927	79362	Myod1	Bhlhb3	0	0	1	1	0	0	1	0	0	ext	0.22824	0.0861876	14.9	15.2	0.00988248	15.1	protein amino acid phosphorylation	organ morphogenesis
4654	79365	MYOD1	BHLHE41	17927	79362	Myod1	Bhlhb3	0	0	1	1	0	0	1	0	0	ext	0.22824	0.0861876	14.9	15.2	0.00988248	15.1	tissue development	organ morphogenesis
4654	79365	MYOD1	BHLHE41	17927	79362	Myod1	Bhlhb3	0	0	1	1	0	0	1	0	0	ext	0.22824	0.0861876	14.9	15.2	0.00988248	15.1	response to external stimulus	organ morphogenesis
4654	6095	MYOD1	RORA	17927	19883	Myod1	Rora	0	0	1	1	0	0	1	0	0	ext	0.22824	3.89273e-05	14.9	21.9	0.0124273	19.9	positive regulation of transcription from RNA polymerase II promoter	positive regulation of transcription from RNA polymerase II promoter
4654	6095	MYOD1	RORA	17927	19883	Myod1	Rora	0	0	1	1	0	0	1	0	0	ext	0.22824	3.89273e-05	14.9	21.9	0.0124273	19.9	positive regulation of transcription from RNA polymerase II promoter	anatomical structure formation
4654	6095	MYOD1	RORA	17927	19883	Myod1	Rora	0	0	1	1	0	0	1	0	0	ext	0.22824	3.89273e-05	14.9	21.9	0.0124273	19.9	protein amino acid phosphorylation	positive regulation of transcription from RNA polymerase II promoter
4654	6095	MYOD1	RORA	17927	19883	Myod1	Rora	0	0	1	1	0	0	1	0	0	ext	0.22824	3.89273e-05	14.9	21.9	0.0124273	19.9	protein amino acid phosphorylation	anatomical structure formation
4654	6095	MYOD1	RORA	17927	19883	Myod1	Rora	0	0	1	1	0	0	1	0	0	ext	0.22824	3.89273e-05	14.9	21.9	0.0124273	19.9	tissue development	positive regulation of transcription from RNA polymerase II promoter
4654	6095	MYOD1	RORA	17927	19883	Myod1	Rora	0	0	1	1	0	0	1	0	0	ext	0.22824	3.89273e-05	14.9	21.9	0.0124273	19.9	tissue development	anatomical structure formation
4654	6095	MYOD1	RORA	17927	19883	Myod1	Rora	0	0	1	1	0	0	1	0	0	ext	0.22824	3.89273e-05	14.9	21.9	0.0124273	19.9	response to external stimulus	positive regulation of transcription from RNA polymerase II promoter
4654	6095	MYOD1	RORA	17927	19883	Myod1	Rora	0	0	1	1	0	0	1	0	0	ext	0.22824	3.89273e-05	14.9	21.9	0.0124273	19.9	response to external stimulus	anatomical structure formation
4830	6095	NME1	RORA	18102	19883	Nme1	Rora	0	0	1	1	0	0	1	0	0	ext	4.63353e-05	3.89273e-05	20.3	21.9	0	21.3	regulation of cell proliferation	positive regulation of transcription from RNA polymerase II promoter
4830	6095	NME1	RORA	18102	19883	Nme1	Rora	0	0	1	1	0	0	1	0	0	ext	4.63353e-05	3.89273e-05	20.3	21.9	0	21.3	regulation of cell proliferation	anatomical structure formation
4830	6095	NME1	RORA	18102	19883	Nme1	Rora	0	0	1	1	0	0	1	0	0	ext	4.63353e-05	3.89273e-05	20.3	21.9	0	21.3	positive regulation of molecular function	positive regulation of transcription from RNA polymerase II promoter
4830	6095	NME1	RORA	18102	19883	Nme1	Rora	0	0	1	1	0	0	1	0	0	ext	4.63353e-05	3.89273e-05	20.3	21.9	0	21.3	positive regulation of molecular function	anatomical structure formation
4830	6096	NME1	RORB	18102	225998	Nme1	Rorb	0	0	1	1	0	0	1	0	0	ext	4.63353e-05	0.531295	20.3	22	0.00911236	20.9	regulation of cell proliferation	organ morphogenesis
4830	6096	NME1	RORB	18102	225998	Nme1	Rorb	0	0	1	1	0	0	1	0	0	ext	4.63353e-05	0.531295	20.3	22	0.00911236	20.9	positive regulation of molecular function	organ morphogenesis
4831	6095	NME2	RORA	18103	19883	Nme2	Rora	0	0	1	1	0	0	1	0	0	ext	0.377309	3.89273e-05	19.6	21.9	0	21.8	regulation of cell proliferation	positive regulation of transcription from RNA polymerase II promoter
4831	6095	NME2	RORA	18103	19883	Nme2	Rora	0	0	1	1	0	0	1	0	0	ext	0.377309	3.89273e-05	19.6	21.9	0	21.8	regulation of cell proliferation	anatomical structure formation
4831	6095	NME2	RORA	18103	19883	Nme2	Rora	0	0	1	1	0	0	1	0	0	ext	0.377309	3.89273e-05	19.6	21.9	0	21.8	tissue development	positive regulation of transcription from RNA polymerase II promoter
4831	6095	NME2	RORA	18103	19883	Nme2	Rora	0	0	1	1	0	0	1	0	0	ext	0.377309	3.89273e-05	19.6	21.9	0	21.8	tissue development	anatomical structure formation
4831	6095	NME2	RORA	18103	19883	Nme2	Rora	0	0	1	1	0	0	1	0	0	ext	0.377309	3.89273e-05	19.6	21.9	0	21.8	negative regulation of developmental process	positive regulation of transcription from RNA polymerase II promoter
4831	6095	NME2	RORA	18103	19883	Nme2	Rora	0	0	1	1	0	0	1	0	0	ext	0.377309	3.89273e-05	19.6	21.9	0	21.8	negative regulation of developmental process	anatomical structure formation
4831	6096	NME2	RORB	18103	225998	Nme2	Rorb	0	0	1	1	0	0	1	0	0	ext	0.377309	0.531295	19.6	22	0.325214	21.6	regulation of cell proliferation	organ morphogenesis
4831	6096	NME2	RORB	18103	225998	Nme2	Rorb	0	0	1	1	0	0	1	0	0	ext	0.377309	0.531295	19.6	22	0.325214	21.6	tissue development	organ morphogenesis
4831	6096	NME2	RORB	18103	225998	Nme2	Rorb	0	0	1	1	0	0	1	0	0	ext	0.377309	0.531295	19.6	22	0.325214	21.6	negative regulation of developmental process	organ morphogenesis
4841	5111	NONO	PCNA	53610	18538	Nono	Pcna	0	0	1	1	0	1	0	0	0	ext	0	0.132719	4.1	15.9	0.99172	7.6	DNA repair	DNA repair
4841	5111	NONO	PCNA	53610	18538	Nono	Pcna	0	0	1	1	0	1	0	0	0	ext	0	0.132719	4.1	15.9	0.99172	7.6	DNA repair	intracellular signaling cascade
4841	5829	NONO	PXN	53610	19303	Nono	Pxn	0	0	1	1	0	1	0	0	0	ext	0	0.000775925	4.1	4.4	0	4.4	DNA repair	cell surface receptor linked signal transduction
4841	5829	NONO	PXN	53610	19303	Nono	Pxn	0	0	1	1	0	1	0	0	0	ext	0	0.000775925	4.1	4.4	0	4.4	DNA repair	anatomical structure formation
4841	6421	NONO	SFPQ	53610	71514	Nono	Sfpq	0	0	1	1	0	1	0	0	0	ext	0	0.0501947	4.1	5.2	0.00282567	5	DNA repair	DNA repair
4841	6688	NONO	SPI1	53610	20375	Nono	Sfpi1	0	0	1	1	0	1	0	0	0	ext	0	0.626679	4.1	2.6	0.0501346	3.4	DNA repair	negative regulation of transcription from RNA polymerase II promoter
4841	6688	NONO	SPI1	53610	20375	Nono	Sfpi1	0	0	1	1	0	1	0	0	0	ext	0	0.626679	4.1	2.6	0.0501346	3.4	DNA repair	hemopoiesis
4841	6688	NONO	SPI1	53610	20375	Nono	Sfpi1	0	0	1	1	0	1	0	0	0	ext	0	0.626679	4.1	2.6	0.0501346	3.4	DNA repair	hemopoietic or lymphoid organ development
4841	6688	NONO	SPI1	53610	20375	Nono	Sfpi1	0	0	1	1	0	1	0	0	0	ext	0	0.626679	4.1	2.6	0.0501346	3.4	DNA repair	immune system development
4841	6688	NONO	SPI1	53610	20375	Nono	Sfpi1	0	0	1	1	0	1	0	0	0	ext	0	0.626679	4.1	2.6	0.0501346	3.4	DNA repair	homeostatic process
4841	7414	NONO	VCL	53610	22330	Nono	Vcl	0	0	1	1	0	1	0	0	0	ext	0	0.00391224	4.1	0.4	0.000106383	1	DNA repair	anatomical structure formation
4842	51655	NOS1	RASD1	18125	19416	Nos1	Rasd1	0	0	1	1	0	0	1	0	0	ext	0.0113401	0.233067	15.2	15.8	0.00214706	15.4	homeostatic process	intracellular signaling cascade
4842	51655	NOS1	RASD1	18125	19416	Nos1	Rasd1	0	0	1	1	0	0	1	0	0	ext	0.0113401	0.233067	15.2	15.8	0.00214706	15.4	homeostatic process	cell surface receptor linked signal transduction
4842	51655	NOS1	RASD1	18125	19416	Nos1	Rasd1	0	0	1	1	0	0	1	0	0	ext	0.0113401	0.233067	15.2	15.8	0.00214706	15.4	tissue development	intracellular signaling cascade
4842	51655	NOS1	RASD1	18125	19416	Nos1	Rasd1	0	0	1	1	0	0	1	0	0	ext	0.0113401	0.233067	15.2	15.8	0.00214706	15.4	tissue development	cell surface receptor linked signal transduction
4842	51655	NOS1	RASD1	18125	19416	Nos1	Rasd1	0	0	1	1	0	0	1	0	0	ext	0.0113401	0.233067	15.2	15.8	0.00214706	15.4	anatomical structure formation	intracellular signaling cascade
4842	51655	NOS1	RASD1	18125	19416	Nos1	Rasd1	0	0	1	1	0	0	1	0	0	ext	0.0113401	0.233067	15.2	15.8	0.00214706	15.4	anatomical structure formation	cell surface receptor linked signal transduction
406	3091	ARNTL	HIF1A	11865	15251	Arntl	Hif1a	0	0	1	1	0	1	0	0	0	ext	0	0.00680597	22.4	9.6	0	22.4	circadian rhythm	regulation of cell proliferation
406	8850	ARNTL	KAT2B	11865	18519	Arntl	Kat2b	0	0	1	1	0	1	0	0	0	ext	0	0	22.4	8.4	0	22.6	circadian rhythm	regulation of cell proliferation
4862	8850	NPAS2	KAT2B	18143	18519	Npas2	Kat2b	0	0	1	1	0	1	0	0	0	ext	0	0	0.9	8.4	0	1.6	circadian rhythm	regulation of cell proliferation
8914	54962	TIMELESS	TIPIN	21853	66131	Timeless	Tipin	0	0	1	1	0	1	0	0	0	ext	0.300916	0.0858411	19.6	4.5	0.576953	0.3	circadian rhythm	regulation of cell proliferation
406	8553	ARNTL	BHLHE40	11865	20893	Arntl	Bhlhb2	1	0	1	1	1	1	1	0	0	unihi.y2h	0	0.000859098	22.4	12.4	0	21.5	circadian rhythm	response to external stimulus
1407	5187	CRY1	PER1	12952	18626	Cry1	Per1	1	0	1	1	1	1	1	0	0	unihi.y2h	0	0	19.8	17.7	0	18.6	circadian rhythm	response to external stimulus
1407	8553	CRY1	BHLHE40	12952	20893	Cry1	Bhlhb2	1	0	1	0	1	1	1	0	0	y2h	0	0.000859098	19.8	12.4	0	18.6	circadian rhythm	response to external stimulus
4862	5914	NPAS2	RARA	18143	19401	Npas2	Rara	0	0	1	1	0	1	0	0	0	ext	0	0.329247	0.9	18	0	0.6	positive regulation of transcription from RNA polymerase II promoter	hemopoiesis
4862	5914	NPAS2	RARA	18143	19401	Npas2	Rara	0	0	1	1	0	1	0	0	0	ext	0	0.329247	0.9	18	0	0.6	positive regulation of transcription from RNA polymerase II promoter	hemopoietic or lymphoid organ development
4862	5914	NPAS2	RARA	18143	19401	Npas2	Rara	0	0	1	1	0	1	0	0	0	ext	0	0.329247	0.9	18	0	0.6	positive regulation of transcription from RNA polymerase II promoter	immune system development
4862	5914	NPAS2	RARA	18143	19401	Npas2	Rara	0	0	1	1	0	1	0	0	0	ext	0	0.329247	0.9	18	0	0.6	positive regulation of transcription from RNA polymerase II promoter	response to organic substance
4862	5914	NPAS2	RARA	18143	19401	Npas2	Rara	0	0	1	1	0	1	0	0	0	ext	0	0.329247	0.9	18	0	0.6	positive regulation of transcription from RNA polymerase II promoter	intracellular signaling cascade
4862	5914	NPAS2	RARA	18143	19401	Npas2	Rara	0	0	1	1	0	1	0	0	0	ext	0	0.329247	0.9	18	0	0.6	positive regulation of transcription from RNA polymerase II promoter	negative regulation of developmental process
4862	5914	NPAS2	RARA	18143	19401	Npas2	Rara	0	0	1	1	0	1	0	0	0	ext	0	0.329247	0.9	18	0	0.6	positive regulation of transcription from RNA polymerase II promoter	response to external stimulus
1408	5187	CRY2	PER1	12953	18626	Cry2	Per1	1	0	1	1	1	1	1	0	0	unihi.y2h	0.0425479	0	9.2	17.7	2.73973e-05	10.9	circadian rhythm	response to external stimulus
1408	8553	CRY2	BHLHE40	12953	20893	Cry2	Bhlhb2	1	0	1	0	1	1	1	0	0	y2h	0.0425479	0.000859098	9.2	12.4	0.000711864	11.3	circadian rhythm	response to external stimulus
4862	8553	NPAS2	BHLHE40	18143	20893	Npas2	Bhlhb2	1	0	1	0	1	1	1	0	0	y2h	0	0.000859098	0.9	12.4	9.38628e-05	1.1	circadian rhythm	response to external stimulus
5187	8553	PER1	BHLHE40	18626	20893	Per1	Bhlhb2	1	0	1	0	1	1	1	0	0	y2h	0	0.000859098	17.7	12.4	0	11.9	circadian rhythm	response to external stimulus
8553	8553	BHLHE40	BHLHE40	20893	20893	Bhlhb2	Bhlhb2	1	0	1	1	1	1	1	0	0	unihi.y2h	0.000859098	0.000859098	12.4	12.4	0.000162791	12.3	circadian rhythm	response to external stimulus
5187	5187	PER1	PER1	18626	18626	Per1	Per1	0	1	0	0	1	1	1	0	0	man	0	0	17.7	17.7	0	11.6	circadian rhythm	response to external stimulus
4862	6256	NPAS2	RXRA	18143	20181	Npas2	Rxra	0	0	1	1	0	1	0	0	0	ext	0	0.00211631	0.9	6.9	0	1.6	positive regulation of transcription from RNA polymerase II promoter	positive regulation of transcription from RNA polymerase II promoter
4862	6256	NPAS2	RXRA	18143	20181	Npas2	Rxra	0	0	1	1	0	1	0	0	0	ext	0	0.00211631	0.9	6.9	0	1.6	positive regulation of transcription from RNA polymerase II promoter	interspecies interaction between organisms
4862	6256	NPAS2	RXRA	18143	20181	Npas2	Rxra	0	0	1	1	0	1	0	0	0	ext	0	0.00211631	0.9	6.9	0	1.6	positive regulation of transcription from RNA polymerase II promoter	organ morphogenesis
4862	6256	NPAS2	RXRA	18143	20181	Npas2	Rxra	0	0	1	1	0	1	0	0	0	ext	0	0.00211631	0.9	6.9	0	1.6	positive regulation of transcription from RNA polymerase II promoter	intracellular signaling cascade
4862	6256	NPAS2	RXRA	18143	20181	Npas2	Rxra	0	0	1	1	0	1	0	0	0	ext	0	0.00211631	0.9	6.9	0	1.6	positive regulation of transcription from RNA polymerase II promoter	tissue development
4862	6256	NPAS2	RXRA	18143	20181	Npas2	Rxra	0	0	1	1	0	1	0	0	0	ext	0	0.00211631	0.9	6.9	0	1.6	positive regulation of transcription from RNA polymerase II promoter	response to external stimulus
9575	56938	CLOCK	ARNTL2	12753	272322	Clock	Arntl2	0	0	1	1	1	1	1	0	0	unihi	0	0.37551	23	16.5	0	22.6	circadian rhythm	response to external stimulus
4862	8202	NPAS2	NCOA3	18143	17979	Npas2	Ncoa3	0	0	1	1	0	1	0	0	0	ext	0	0.14549	0.9	4.1	0	1.3	positive regulation of transcription from RNA polymerase II promoter	intracellular signaling cascade
406	3091	ARNTL	HIF1A	11865	15251	Arntl	Hif1a	0	0	1	1	0	1	0	0	0	ext	0	0.00680597	22.4	9.6	0	22.4	circadian rhythm	response to external stimulus
4862	5914	NPAS2	RARA	18143	19401	Npas2	Rara	0	0	1	1	0	1	0	0	0	ext	0	0.329247	0.9	18	0	0.6	circadian rhythm	response to external stimulus
4862	6256	NPAS2	RXRA	18143	20181	Npas2	Rxra	0	0	1	1	0	1	0	0	0	ext	0	0.00211631	0.9	6.9	0	1.6	circadian rhythm	response to external stimulus
9572	10002	NR1D1	NR2E3	217166	23958	Nr1d1	Nr2e3	0	0	1	1	0	1	0	0	0	ext	0	0.467987	6.8	17.4	0	6.9	circadian rhythm	response to external stimulus
4862	8850	NPAS2	KAT2B	18143	18519	Npas2	Kat2b	0	0	1	1	0	1	0	0	0	ext	0	0	0.9	8.4	0	1.6	positive regulation of transcription from RNA polymerase II promoter	chromatin modification
4862	8850	NPAS2	KAT2B	18143	18519	Npas2	Kat2b	0	0	1	1	0	1	0	0	0	ext	0	0	0.9	8.4	0	1.6	positive regulation of transcription from RNA polymerase II promoter	chromatin organization
4862	8850	NPAS2	KAT2B	18143	18519	Npas2	Kat2b	0	0	1	1	0	1	0	0	0	ext	0	0	0.9	8.4	0	1.6	positive regulation of transcription from RNA polymerase II promoter	interspecies interaction between organisms
4862	8850	NPAS2	KAT2B	18143	18519	Npas2	Kat2b	0	0	1	1	0	1	0	0	0	ext	0	0	0.9	8.4	0	1.6	positive regulation of transcription from RNA polymerase II promoter	regulation of cell proliferation
5469	6095	MED1	RORA	19014	19883	Med1	Rora	0	0	1	1	0	0	1	0	0	ext	0.0492855	3.89273e-05	23.3	21.9	3.05677e-05	22.4	positive regulation of transcription from RNA polymerase II promoter	positive regulation of transcription from RNA polymerase II promoter
5469	6095	MED1	RORA	19014	19883	Med1	Rora	0	0	1	1	0	0	1	0	0	ext	0.0492855	3.89273e-05	23.3	21.9	3.05677e-05	22.4	positive regulation of transcription from RNA polymerase II promoter	anatomical structure formation
5469	6095	MED1	RORA	19014	19883	Med1	Rora	0	0	1	1	0	0	1	0	0	ext	0.0492855	3.89273e-05	23.3	21.9	3.05677e-05	22.4	intracellular signaling cascade	positive regulation of transcription from RNA polymerase II promoter
5469	6095	MED1	RORA	19014	19883	Med1	Rora	0	0	1	1	0	0	1	0	0	ext	0.0492855	3.89273e-05	23.3	21.9	3.05677e-05	22.4	intracellular signaling cascade	anatomical structure formation
5705	6095	PSMC5	RORA	19184	19883	Psmc5	Rora	0	0	1	1	0	0	1	0	0	ext	0.0612946	3.89273e-05	1.8	21.9	0.000258786	22.9	mitotic cell cycle	positive regulation of transcription from RNA polymerase II promoter
5705	6095	PSMC5	RORA	19184	19883	Psmc5	Rora	0	0	1	1	0	0	1	0	0	ext	0.0612946	3.89273e-05	1.8	21.9	0.000258786	22.9	mitotic cell cycle	anatomical structure formation
5705	6095	PSMC5	RORA	19184	19883	Psmc5	Rora	0	0	1	1	0	0	1	0	0	ext	0.0612946	3.89273e-05	1.8	21.9	0.000258786	22.9	positive regulation of molecular function	positive regulation of transcription from RNA polymerase II promoter
5705	6095	PSMC5	RORA	19184	19883	Psmc5	Rora	0	0	1	1	0	0	1	0	0	ext	0.0612946	3.89273e-05	1.8	21.9	0.000258786	22.9	positive regulation of molecular function	anatomical structure formation
5705	6095	PSMC5	RORA	19184	19883	Psmc5	Rora	0	0	1	1	0	0	1	0	0	ext	0.0612946	3.89273e-05	1.8	21.9	0.000258786	22.9	modification-dependent protein catabolic process	positive regulation of transcription from RNA polymerase II promoter
5705	6095	PSMC5	RORA	19184	19883	Psmc5	Rora	0	0	1	1	0	0	1	0	0	ext	0.0612946	3.89273e-05	1.8	21.9	0.000258786	22.9	modification-dependent protein catabolic process	anatomical structure formation
5705	6095	PSMC5	RORA	19184	19883	Psmc5	Rora	0	0	1	1	0	0	1	0	0	ext	0.0612946	3.89273e-05	1.8	21.9	0.000258786	22.9	modification-dependent macromolecule catabolic process	positive regulation of transcription from RNA polymerase II promoter
5705	6095	PSMC5	RORA	19184	19883	Psmc5	Rora	0	0	1	1	0	0	1	0	0	ext	0.0612946	3.89273e-05	1.8	21.9	0.000258786	22.9	modification-dependent macromolecule catabolic process	anatomical structure formation
5705	6095	PSMC5	RORA	19184	19883	Psmc5	Rora	0	0	1	1	0	0	1	0	0	ext	0.0612946	3.89273e-05	1.8	21.9	0.000258786	22.9	cellular protein catabolic process	positive regulation of transcription from RNA polymerase II promoter
5705	6095	PSMC5	RORA	19184	19883	Psmc5	Rora	0	0	1	1	0	0	1	0	0	ext	0.0612946	3.89273e-05	1.8	21.9	0.000258786	22.9	cellular protein catabolic process	anatomical structure formation
5705	6095	PSMC5	RORA	19184	19883	Psmc5	Rora	0	0	1	1	0	0	1	0	0	ext	0.0612946	3.89273e-05	1.8	21.9	0.000258786	22.9	proteolysis involved in cellular protein catabolic process	positive regulation of transcription from RNA polymerase II promoter
5705	6095	PSMC5	RORA	19184	19883	Psmc5	Rora	0	0	1	1	0	0	1	0	0	ext	0.0612946	3.89273e-05	1.8	21.9	0.000258786	22.9	proteolysis involved in cellular protein catabolic process	anatomical structure formation
5705	6095	PSMC5	RORA	19184	19883	Psmc5	Rora	0	0	1	1	0	0	1	0	0	ext	0.0612946	3.89273e-05	1.8	21.9	0.000258786	22.9	negative regulation of developmental process	positive regulation of transcription from RNA polymerase II promoter
5705	6095	PSMC5	RORA	19184	19883	Psmc5	Rora	0	0	1	1	0	0	1	0	0	ext	0.0612946	3.89273e-05	1.8	21.9	0.000258786	22.9	negative regulation of developmental process	anatomical structure formation
6095	10499	RORA	NCOA2	19883	17978	Rora	Ncoa2	0	0	1	1	0	1	0	0	0	ext	3.89273e-05	9.48407e-05	21.9	5.7	0.00174937	3.4	positive regulation of transcription from RNA polymerase II promoter	positive regulation of transcription from RNA polymerase II promoter
6095	10499	RORA	NCOA2	19883	17978	Rora	Ncoa2	0	0	1	1	0	1	0	0	0	ext	3.89273e-05	9.48407e-05	21.9	5.7	0.00174937	3.4	positive regulation of transcription from RNA polymerase II promoter	negative regulation of transcription from RNA polymerase II promoter
6095	10499	RORA	NCOA2	19883	17978	Rora	Ncoa2	0	0	1	1	0	1	0	0	0	ext	3.89273e-05	9.48407e-05	21.9	5.7	0.00174937	3.4	positive regulation of transcription from RNA polymerase II promoter	intracellular signaling cascade
6095	10499	RORA	NCOA2	19883	17978	Rora	Ncoa2	0	0	1	1	0	1	0	0	0	ext	3.89273e-05	9.48407e-05	21.9	5.7	0.00174937	3.4	anatomical structure formation	positive regulation of transcription from RNA polymerase II promoter
6095	10499	RORA	NCOA2	19883	17978	Rora	Ncoa2	0	0	1	1	0	1	0	0	0	ext	3.89273e-05	9.48407e-05	21.9	5.7	0.00174937	3.4	anatomical structure formation	negative regulation of transcription from RNA polymerase II promoter
6095	10499	RORA	NCOA2	19883	17978	Rora	Ncoa2	0	0	1	1	0	1	0	0	0	ext	3.89273e-05	9.48407e-05	21.9	5.7	0.00174937	3.4	anatomical structure formation	intracellular signaling cascade
6096	8648	RORB	NCOA1	225998	17977	Rorb	Ncoa1	0	0	1	1	0	1	0	0	0	ext	0.531295	0.00100068	22	4.7	0.00181297	3.9	organ morphogenesis	positive regulation of transcription from RNA polymerase II promoter
6096	8648	RORB	NCOA1	225998	17977	Rorb	Ncoa1	0	0	1	1	0	1	0	0	0	ext	0.531295	0.00100068	22	4.7	0.00181297	3.9	organ morphogenesis	intracellular signaling cascade
6096	83714	RORB	NRIP2	225998	60345	Rorb	Nrip2	0	0	1	1	0	1	0	0	0	ext	0.531295	0.0380418	22	15.2	0.11496	16.9	organ morphogenesis	negative regulation of transcription from RNA polymerase II promoter
8553	8864	BHLHE40	PER2	20893	18627	Bhlhb2	Per2	1	0	1	0	1	1	1	0	0	y2h	0.000859098	0	12.4	20.1	0	13.6	response to external stimulus	circadian rhythm
6774	8553	STAT3	BHLHE40	20848	20893	Stat3	Bhlhb2	0	0	1	1	0	0	1	0	0	ext	0.00255469	0.000859098	3.2	12.4	0.177285	9.1	negative regulation of transcription from RNA polymerase II promoter	response to external stimulus
8553	8553	BHLHE40	BHLHE40	20893	20893	Bhlhb2	Bhlhb2	1	0	1	1	1	1	1	0	0	unihi.y2h	0.000859098	0.000859098	12.4	12.4	0.000162791	12.3	response to external stimulus	circadian rhythm
6774	8553	STAT3	BHLHE40	20848	20893	Stat3	Bhlhb2	0	0	1	1	0	0	1	0	0	ext	0.00255469	0.000859098	3.2	12.4	0.177285	9.1	interspecies interaction between organisms	response to external stimulus
5187	5187	PER1	PER1	18626	18626	Per1	Per1	0	1	0	0	1	1	1	0	0	man	0	0	17.7	17.7	0	11.6	response to external stimulus	circadian rhythm
6774	8553	STAT3	BHLHE40	20848	20893	Stat3	Bhlhb2	0	0	1	1	0	0	1	0	0	ext	0.00255469	0.000859098	3.2	12.4	0.177285	9.1	response to organic substance	response to external stimulus
5187	8864	PER1	PER2	18626	18627	Per1	Per2	0	1	1	1	1	1	1	0	0	man	0	0	17.7	20.1	0	13.3	response to external stimulus	circadian rhythm
6774	8553	STAT3	BHLHE40	20848	20893	Stat3	Bhlhb2	0	0	1	1	0	0	1	0	0	ext	0.00255469	0.000859098	3.2	12.4	0.177285	9.1	organ morphogenesis	response to external stimulus
5578	8864	PRKCA	PER2	18750	18627	Prkca	Per2	0	1	0	0	1	1	1	1	0	man	0.00678513	0	7.5	20.1	0	13.6	response to external stimulus	circadian rhythm
6774	8553	STAT3	BHLHE40	20848	20893	Stat3	Bhlhb2	0	0	1	1	0	0	1	0	0	ext	0.00255469	0.000859098	3.2	12.4	0.177285	9.1	homeostatic process	response to external stimulus
5187	8914	PER1	TIMELESS	18626	21853	Per1	Timeless	0	0	1	1	1	1	1	0	0	unihi	0	0.300916	17.7	19.6	4.89796e-05	12.4	response to external stimulus	circadian rhythm
6774	8553	STAT3	BHLHE40	20848	20893	Stat3	Bhlhb2	0	0	1	1	0	0	1	0	0	ext	0.00255469	0.000859098	3.2	12.4	0.177285	9.1	intracellular signaling cascade	response to external stimulus
3091	5187	HIF1A	PER1	15251	18626	Hif1a	Per1	0	0	1	1	0	0	1	0	0	ext	0.00680597	0	9.6	17.7	0	11.4	response to external stimulus	circadian rhythm
6774	8553	STAT3	BHLHE40	20848	20893	Stat3	Bhlhb2	0	0	1	1	0	0	1	0	0	ext	0.00255469	0.000859098	3.2	12.4	0.177285	9.1	cell surface receptor linked signal transduction	response to external stimulus
5515	8553	PPP2CA	BHLHE40	19052	20893	Ppp2ca	Bhlhb2	1	0	1	0	1	1	1	1	0	y2h	0.023019	0.000859098	9.1	12.4	3.84615e-05	11.9	response to organic substance	circadian rhythm
7329	8553	UBE2I	BHLHE40	22196	20893	Ube2i	Bhlhb2	0	0	1	1	0	0	1	0	0	ext	0.000613374	0.000859098	5.1	12.4	0.00408706	10.8	interspecies interaction between organisms	response to external stimulus
5518	8553	PPP2R1A	BHLHE40	51792	20893	Ppp2r1a	Bhlhb2	1	0	1	0	1	1	1	1	0	y2h	0.000944137	0.000859098	3.7	12.4	0.029	10.6	response to organic substance	circadian rhythm
7329	8553	UBE2I	BHLHE40	22196	20893	Ube2i	Bhlhb2	0	0	1	1	0	0	1	0	0	ext	0.000613374	0.000859098	5.1	12.4	0.00408706	10.8	mitotic cell cycle	response to external stimulus
5578	8864	PRKCA	PER2	18750	18627	Prkca	Per2	0	1	0	0	1	1	1	1	0	man	0.00678513	0	7.5	20.1	0	13.6	response to organic substance	circadian rhythm
7329	8553	UBE2I	BHLHE40	22196	20893	Ube2i	Bhlhb2	0	0	1	1	0	0	1	0	0	ext	0.000613374	0.000859098	5.1	12.4	0.00408706	10.8	modification-dependent protein catabolic process	response to external stimulus
3320	4862	HSP90AA1	NPAS2	15519	18143	Hsp90aa1	Npas2	0	0	1	1	0	0	1	0	0	ext	0	0	19.2	0.9	0	23.5	response to organic substance	circadian rhythm
7329	8553	UBE2I	BHLHE40	22196	20893	Ube2i	Bhlhb2	0	0	1	1	0	0	1	0	0	ext	0.000613374	0.000859098	5.1	12.4	0.00408706	10.8	modification-dependent macromolecule catabolic process	response to external stimulus
6774	8553	STAT3	BHLHE40	20848	20893	Stat3	Bhlhb2	0	0	1	1	0	0	1	0	0	ext	0.00255469	0.000859098	3.2	12.4	0.177285	9.1	response to organic substance	circadian rhythm
7329	8553	UBE2I	BHLHE40	22196	20893	Ube2i	Bhlhb2	0	0	1	1	0	0	1	0	0	ext	0.000613374	0.000859098	5.1	12.4	0.00408706	10.8	cellular protein catabolic process	response to external stimulus
5515	8553	PPP2CA	BHLHE40	19052	20893	Ppp2ca	Bhlhb2	1	0	1	0	1	1	1	1	0	y2h	0.023019	0.000859098	9.1	12.4	3.84615e-05	11.9	tissue development	circadian rhythm
7329	8553	UBE2I	BHLHE40	22196	20893	Ube2i	Bhlhb2	0	0	1	1	0	0	1	0	0	ext	0.000613374	0.000859098	5.1	12.4	0.00408706	10.8	proteolysis involved in cellular protein catabolic process	response to external stimulus
5578	8864	PRKCA	PER2	18750	18627	Prkca	Per2	0	1	0	0	1	1	1	1	0	man	0.00678513	0	7.5	20.1	0	13.6	tissue development	circadian rhythm
8850	9575	KAT2B	CLOCK	18519	12753	Kat2b	Clock	0	0	1	1	0	0	1	0	0	ext	0	0	8.4	23	0	0.3	chromatin modification	positive regulation of transcription from RNA polymerase II promoter
2033	9575	EP300	CLOCK	328572	12753	Ep300	Clock	0	0	1	1	0	0	1	0	0	ext	0.0181655	0	5.6	23	0	0.6	tissue development	circadian rhythm
8850	9575	KAT2B	CLOCK	18519	12753	Kat2b	Clock	0	0	1	1	0	0	1	0	0	ext	0	0	8.4	23	0	0.3	chromatin organization	positive regulation of transcription from RNA polymerase II promoter
2033	4862	EP300	NPAS2	328572	18143	Ep300	Npas2	0	0	1	1	0	0	1	0	0	ext	0.0181655	0	5.6	0.9	0	1.6	tissue development	circadian rhythm
8850	9575	KAT2B	CLOCK	18519	12753	Kat2b	Clock	0	0	1	1	0	0	1	0	0	ext	0	0	8.4	23	0	0.3	interspecies interaction between organisms	positive regulation of transcription from RNA polymerase II promoter
3091	5187	HIF1A	PER1	15251	18626	Hif1a	Per1	0	0	1	1	0	0	1	0	0	ext	0.00680597	0	9.6	17.7	0	11.4	tissue development	circadian rhythm
8850	9575	KAT2B	CLOCK	18519	12753	Kat2b	Clock	0	0	1	1	0	0	1	0	0	ext	0	0	8.4	23	0	0.3	regulation of cell proliferation	positive regulation of transcription from RNA polymerase II promoter
406	3320	ARNTL	HSP90AA1	11865	15519	Arntl	Hsp90aa1	0	0	1	1	0	1	0	0	0	ext	0	0	22.4	19.2	0	21.7	circadian rhythm	response to organic substance
8914	11277	TIMELESS	TREX1	21853	22040	Timeless	Trex1	0	0	1	1	0	1	0	0	0	ext	0.300916	0.0486737	19.6	3.7	0.385361	23.8	regulation of cell proliferation	DNA repair
8914	11277	TIMELESS	TREX1	21853	22040	Timeless	Trex1	0	0	1	1	0	1	0	0	0	ext	0.300916	0.0486737	19.6	3.7	0.385361	23.8	organ morphogenesis	DNA repair
8914	11277	TIMELESS	TREX1	21853	22040	Timeless	Trex1	0	0	1	1	0	1	0	0	0	ext	0.300916	0.0486737	19.6	3.7	0.385361	23.8	mitotic cell cycle	DNA repair
8914	11277	TIMELESS	TREX1	21853	22040	Timeless	Trex1	0	0	1	1	0	1	0	0	0	ext	0.300916	0.0486737	19.6	3.7	0.385361	23.8	tissue development	DNA repair
4862	5914	NPAS2	RARA	18143	19401	Npas2	Rara	0	0	1	1	0	1	0	0	0	ext	0	0.329247	0.9	18	0	0.6	circadian rhythm	response to organic substance
1407	8914	CRY1	TIMELESS	12952	21853	Cry1	Timeless	0	0	1	1	1	1	1	0	0	unihi	0	0.300916	19.8	19.6	0	19.8	circadian rhythm	tissue development
1408	8914	CRY2	TIMELESS	12953	21853	Cry2	Timeless	0	0	1	1	1	1	1	0	0	unihi	0.0425479	0.300916	9.2	19.6	0.347146	10.3	circadian rhythm	tissue development
8914	54962	TIMELESS	TIPIN	21853	66131	Timeless	Tipin	0	0	1	1	0	1	0	0	0	ext	0.300916	0.0858411	19.6	4.5	0.576953	0.3	regulation of cell proliferation	regulation of cell proliferation
8914	54962	TIMELESS	TIPIN	21853	66131	Timeless	Tipin	0	0	1	1	0	1	0	0	0	ext	0.300916	0.0858411	19.6	4.5	0.576953	0.3	regulation of cell proliferation	mitotic cell cycle
8914	54962	TIMELESS	TIPIN	21853	66131	Timeless	Tipin	0	0	1	1	0	1	0	0	0	ext	0.300916	0.0858411	19.6	4.5	0.576953	0.3	regulation of cell proliferation	intracellular signaling cascade
8914	54962	TIMELESS	TIPIN	21853	66131	Timeless	Tipin	0	0	1	1	0	1	0	0	0	ext	0.300916	0.0858411	19.6	4.5	0.576953	0.3	organ morphogenesis	regulation of cell proliferation
8914	54962	TIMELESS	TIPIN	21853	66131	Timeless	Tipin	0	0	1	1	0	1	0	0	0	ext	0.300916	0.0858411	19.6	4.5	0.576953	0.3	organ morphogenesis	mitotic cell cycle
8914	54962	TIMELESS	TIPIN	21853	66131	Timeless	Tipin	0	0	1	1	0	1	0	0	0	ext	0.300916	0.0858411	19.6	4.5	0.576953	0.3	organ morphogenesis	intracellular signaling cascade
8914	54962	TIMELESS	TIPIN	21853	66131	Timeless	Tipin	0	0	1	1	0	1	0	0	0	ext	0.300916	0.0858411	19.6	4.5	0.576953	0.3	mitotic cell cycle	regulation of cell proliferation
8914	54962	TIMELESS	TIPIN	21853	66131	Timeless	Tipin	0	0	1	1	0	1	0	0	0	ext	0.300916	0.0858411	19.6	4.5	0.576953	0.3	mitotic cell cycle	mitotic cell cycle
8914	54962	TIMELESS	TIPIN	21853	66131	Timeless	Tipin	0	0	1	1	0	1	0	0	0	ext	0.300916	0.0858411	19.6	4.5	0.576953	0.3	mitotic cell cycle	intracellular signaling cascade
8914	54962	TIMELESS	TIPIN	21853	66131	Timeless	Tipin	0	0	1	1	0	1	0	0	0	ext	0.300916	0.0858411	19.6	4.5	0.576953	0.3	tissue development	regulation of cell proliferation
8914	54962	TIMELESS	TIPIN	21853	66131	Timeless	Tipin	0	0	1	1	0	1	0	0	0	ext	0.300916	0.0858411	19.6	4.5	0.576953	0.3	tissue development	mitotic cell cycle
8914	54962	TIMELESS	TIPIN	21853	66131	Timeless	Tipin	0	0	1	1	0	1	0	0	0	ext	0.300916	0.0858411	19.6	4.5	0.576953	0.3	tissue development	intracellular signaling cascade
5187	8914	PER1	TIMELESS	18626	21853	Per1	Timeless	0	0	1	1	1	1	1	0	0	unihi	0	0.300916	17.7	19.6	4.89796e-05	12.4	circadian rhythm	tissue development
8864	8914	PER2	TIMELESS	18627	21853	Per2	Timeless	0	0	1	1	1	1	1	0	0	unihi	0	0.300916	20.1	19.6	0	14.4	circadian rhythm	tissue development
406	2033	ARNTL	EP300	11865	328572	Arntl	Ep300	0	0	1	1	0	1	0	0	0	ext	0	0.0181655	22.4	5.6	0	22.9	circadian rhythm	tissue development
406	3091	ARNTL	HIF1A	11865	15251	Arntl	Hif1a	0	0	1	1	0	1	0	0	0	ext	0	0.00680597	22.4	9.6	0	22.4	circadian rhythm	tissue development
4862	6256	NPAS2	RXRA	18143	20181	Npas2	Rxra	0	0	1	1	0	1	0	0	0	ext	0	0.00211631	0.9	6.9	0	1.6	circadian rhythm	tissue development
190	367	NR0B1	AR	11614	11835	Nr0b1	Ar	0	0	1	1	0	0	0	0	0	ext	0.223004	0.0132154	19.7	16.1	0.00509302	17.5	negative regulation of transcription from RNA polymerase II promoter	positive regulation of transcription from RNA polymerase II promoter
190	367	NR0B1	AR	11614	11835	Nr0b1	Ar	0	0	1	1	0	0	0	0	0	ext	0.223004	0.0132154	19.7	16.1	0.00509302	17.5	negative regulation of transcription from RNA polymerase II promoter	embryonic development
190	367	NR0B1	AR	11614	11835	Nr0b1	Ar	0	0	1	1	0	0	0	0	0	ext	0.223004	0.0132154	19.7	16.1	0.00509302	17.5	negative regulation of transcription from RNA polymerase II promoter	intracellular signaling cascade
190	367	NR0B1	AR	11614	11835	Nr0b1	Ar	0	0	1	1	0	0	0	0	0	ext	0.223004	0.0132154	19.7	16.1	0.00509302	17.5	intracellular signaling cascade	positive regulation of transcription from RNA polymerase II promoter
190	367	NR0B1	AR	11614	11835	Nr0b1	Ar	0	0	1	1	0	0	0	0	0	ext	0.223004	0.0132154	19.7	16.1	0.00509302	17.5	intracellular signaling cascade	embryonic development
190	367	NR0B1	AR	11614	11835	Nr0b1	Ar	0	0	1	1	0	0	0	0	0	ext	0.223004	0.0132154	19.7	16.1	0.00509302	17.5	intracellular signaling cascade	intracellular signaling cascade
190	367	NR0B1	AR	11614	11835	Nr0b1	Ar	0	0	1	1	0	0	0	0	0	ext	0.223004	0.0132154	19.7	16.1	0.00509302	17.5	negative regulation of developmental process	positive regulation of transcription from RNA polymerase II promoter
190	367	NR0B1	AR	11614	11835	Nr0b1	Ar	0	0	1	1	0	0	0	0	0	ext	0.223004	0.0132154	19.7	16.1	0.00509302	17.5	negative regulation of developmental process	embryonic development
190	367	NR0B1	AR	11614	11835	Nr0b1	Ar	0	0	1	1	0	0	0	0	0	ext	0.223004	0.0132154	19.7	16.1	0.00509302	17.5	negative regulation of developmental process	intracellular signaling cascade
196	10499	AHR	NCOA2	11622	17978	Ahr	Ncoa2	0	0	1	1	0	0	0	0	0	ext	0.0121611	9.48407e-05	4.8	5.7	3.0837e-05	5.4	positive regulation of transcription from RNA polymerase II promoter	positive regulation of transcription from RNA polymerase II promoter
196	10499	AHR	NCOA2	11622	17978	Ahr	Ncoa2	0	0	1	1	0	0	0	0	0	ext	0.0121611	9.48407e-05	4.8	5.7	3.0837e-05	5.4	positive regulation of transcription from RNA polymerase II promoter	negative regulation of transcription from RNA polymerase II promoter
196	10499	AHR	NCOA2	11622	17978	Ahr	Ncoa2	0	0	1	1	0	0	0	0	0	ext	0.0121611	9.48407e-05	4.8	5.7	3.0837e-05	5.4	positive regulation of transcription from RNA polymerase II promoter	intracellular signaling cascade
196	10499	AHR	NCOA2	11622	17978	Ahr	Ncoa2	0	0	1	1	0	0	0	0	0	ext	0.0121611	9.48407e-05	4.8	5.7	3.0837e-05	5.4	anatomical structure formation	positive regulation of transcription from RNA polymerase II promoter
196	10499	AHR	NCOA2	11622	17978	Ahr	Ncoa2	0	0	1	1	0	0	0	0	0	ext	0.0121611	9.48407e-05	4.8	5.7	3.0837e-05	5.4	anatomical structure formation	negative regulation of transcription from RNA polymerase II promoter
196	10499	AHR	NCOA2	11622	17978	Ahr	Ncoa2	0	0	1	1	0	0	0	0	0	ext	0.0121611	9.48407e-05	4.8	5.7	3.0837e-05	5.4	anatomical structure formation	intracellular signaling cascade
196	9612	AHR	NCOR2	11622	20602	Ahr	Ncor2	0	0	1	1	0	0	0	0	0	ext	0.0121611	0.2914	4.8	5.6	0.025499	5.3	positive regulation of transcription from RNA polymerase II promoter	negative regulation of transcription from RNA polymerase II promoter
196	9612	AHR	NCOR2	11622	20602	Ahr	Ncor2	0	0	1	1	0	0	0	0	0	ext	0.0121611	0.2914	4.8	5.6	0.025499	5.3	anatomical structure formation	negative regulation of transcription from RNA polymerase II promoter
196	2033	AHR	EP300	11622	328572	Ahr	Ep300	0	0	1	1	0	0	0	0	0	ext	0.0121611	0.0181655	4.8	5.6	0.000877384	5.3	positive regulation of transcription from RNA polymerase II promoter	positive regulation of transcription from RNA polymerase II promoter
196	2033	AHR	EP300	11622	328572	Ahr	Ep300	0	0	1	1	0	0	0	0	0	ext	0.0121611	0.0181655	4.8	5.6	0.000877384	5.3	positive regulation of transcription from RNA polymerase II promoter	chromatin modification
196	2033	AHR	EP300	11622	328572	Ahr	Ep300	0	0	1	1	0	0	0	0	0	ext	0.0121611	0.0181655	4.8	5.6	0.000877384	5.3	positive regulation of transcription from RNA polymerase II promoter	chromatin organization
196	2033	AHR	EP300	11622	328572	Ahr	Ep300	0	0	1	1	0	0	0	0	0	ext	0.0121611	0.0181655	4.8	5.6	0.000877384	5.3	positive regulation of transcription from RNA polymerase II promoter	interspecies interaction between organisms
196	2033	AHR	EP300	11622	328572	Ahr	Ep300	0	0	1	1	0	0	0	0	0	ext	0.0121611	0.0181655	4.8	5.6	0.000877384	5.3	positive regulation of transcription from RNA polymerase II promoter	organ morphogenesis
196	2033	AHR	EP300	11622	328572	Ahr	Ep300	0	0	1	1	0	0	0	0	0	ext	0.0121611	0.0181655	4.8	5.6	0.000877384	5.3	positive regulation of transcription from RNA polymerase II promoter	embryonic development
196	2033	AHR	EP300	11622	328572	Ahr	Ep300	0	0	1	1	0	0	0	0	0	ext	0.0121611	0.0181655	4.8	5.6	0.000877384	5.3	positive regulation of transcription from RNA polymerase II promoter	homeostatic process
196	2033	AHR	EP300	11622	328572	Ahr	Ep300	0	0	1	1	0	0	0	0	0	ext	0.0121611	0.0181655	4.8	5.6	0.000877384	5.3	positive regulation of transcription from RNA polymerase II promoter	positive regulation of molecular function
196	2033	AHR	EP300	11622	328572	Ahr	Ep300	0	0	1	1	0	0	0	0	0	ext	0.0121611	0.0181655	4.8	5.6	0.000877384	5.3	positive regulation of transcription from RNA polymerase II promoter	tissue development
196	2033	AHR	EP300	11622	328572	Ahr	Ep300	0	0	1	1	0	0	0	0	0	ext	0.0121611	0.0181655	4.8	5.6	0.000877384	5.3	anatomical structure formation	positive regulation of transcription from RNA polymerase II promoter
196	2033	AHR	EP300	11622	328572	Ahr	Ep300	0	0	1	1	0	0	0	0	0	ext	0.0121611	0.0181655	4.8	5.6	0.000877384	5.3	anatomical structure formation	chromatin modification
196	2033	AHR	EP300	11622	328572	Ahr	Ep300	0	0	1	1	0	0	0	0	0	ext	0.0121611	0.0181655	4.8	5.6	0.000877384	5.3	anatomical structure formation	chromatin organization
196	2033	AHR	EP300	11622	328572	Ahr	Ep300	0	0	1	1	0	0	0	0	0	ext	0.0121611	0.0181655	4.8	5.6	0.000877384	5.3	anatomical structure formation	interspecies interaction between organisms
196	2033	AHR	EP300	11622	328572	Ahr	Ep300	0	0	1	1	0	0	0	0	0	ext	0.0121611	0.0181655	4.8	5.6	0.000877384	5.3	anatomical structure formation	organ morphogenesis
196	2033	AHR	EP300	11622	328572	Ahr	Ep300	0	0	1	1	0	0	0	0	0	ext	0.0121611	0.0181655	4.8	5.6	0.000877384	5.3	anatomical structure formation	embryonic development
196	2033	AHR	EP300	11622	328572	Ahr	Ep300	0	0	1	1	0	0	0	0	0	ext	0.0121611	0.0181655	4.8	5.6	0.000877384	5.3	anatomical structure formation	homeostatic process
196	2033	AHR	EP300	11622	328572	Ahr	Ep300	0	0	1	1	0	0	0	0	0	ext	0.0121611	0.0181655	4.8	5.6	0.000877384	5.3	anatomical structure formation	positive regulation of molecular function
196	2033	AHR	EP300	11622	328572	Ahr	Ep300	0	0	1	1	0	0	0	0	0	ext	0.0121611	0.0181655	4.8	5.6	0.000877384	5.3	anatomical structure formation	tissue development
196	3320	AHR	HSP90AA1	11622	15519	Ahr	Hsp90aa1	0	0	1	1	0	0	0	0	0	ext	0.0121611	0	4.8	19.2	0	20.7	positive regulation of transcription from RNA polymerase II promoter	response to organic substance
196	3320	AHR	HSP90AA1	11622	15519	Ahr	Hsp90aa1	0	0	1	1	0	0	0	0	0	ext	0.0121611	0	4.8	19.2	0	20.7	positive regulation of transcription from RNA polymerase II promoter	anatomical structure formation
196	3320	AHR	HSP90AA1	11622	15519	Ahr	Hsp90aa1	0	0	1	1	0	0	0	0	0	ext	0.0121611	0	4.8	19.2	0	20.7	anatomical structure formation	response to organic substance
196	3320	AHR	HSP90AA1	11622	15519	Ahr	Hsp90aa1	0	0	1	1	0	0	0	0	0	ext	0.0121611	0	4.8	19.2	0	20.7	anatomical structure formation	anatomical structure formation
196	8648	AHR	NCOA1	11622	17977	Ahr	Ncoa1	0	0	1	1	0	0	0	0	0	ext	0.0121611	0.00100068	4.8	4.7	0.000174342	4.8	positive regulation of transcription from RNA polymerase II promoter	positive regulation of transcription from RNA polymerase II promoter
196	8648	AHR	NCOA1	11622	17977	Ahr	Ncoa1	0	0	1	1	0	0	0	0	0	ext	0.0121611	0.00100068	4.8	4.7	0.000174342	4.8	positive regulation of transcription from RNA polymerase II promoter	intracellular signaling cascade
196	8648	AHR	NCOA1	11622	17977	Ahr	Ncoa1	0	0	1	1	0	0	0	0	0	ext	0.0121611	0.00100068	4.8	4.7	0.000174342	4.8	anatomical structure formation	positive regulation of transcription from RNA polymerase II promoter
196	8648	AHR	NCOA1	11622	17977	Ahr	Ncoa1	0	0	1	1	0	0	0	0	0	ext	0.0121611	0.00100068	4.8	4.7	0.000174342	4.8	anatomical structure formation	intracellular signaling cascade
196	196	AHR	AHR	11622	11622	Ahr	Ahr	0	0	1	1	0	0	0	0	0	ext	0.0121611	0.0121611	4.8	4.8	0.00359427	4.9	positive regulation of transcription from RNA polymerase II promoter	positive regulation of transcription from RNA polymerase II promoter
196	196	AHR	AHR	11622	11622	Ahr	Ahr	0	0	1	1	0	0	0	0	0	ext	0.0121611	0.0121611	4.8	4.8	0.00359427	4.9	positive regulation of transcription from RNA polymerase II promoter	anatomical structure formation
196	196	AHR	AHR	11622	11622	Ahr	Ahr	0	0	1	1	0	0	0	0	0	ext	0.0121611	0.0121611	4.8	4.8	0.00359427	4.9	anatomical structure formation	positive regulation of transcription from RNA polymerase II promoter
196	196	AHR	AHR	11622	11622	Ahr	Ahr	0	0	1	1	0	0	0	0	0	ext	0.0121611	0.0121611	4.8	4.8	0.00359427	4.9	anatomical structure formation	anatomical structure formation
196	6667	AHR	SP1	11622	20683	Ahr	Sp1	0	0	1	1	0	0	0	0	0	ext	0.0121611	3.08506e-05	4.8	2.8	3.82979e-05	3.8	positive regulation of transcription from RNA polymerase II promoter	positive regulation of transcription from RNA polymerase II promoter
196	6667	AHR	SP1	11622	20683	Ahr	Sp1	0	0	1	1	0	0	0	0	0	ext	0.0121611	3.08506e-05	4.8	2.8	3.82979e-05	3.8	positive regulation of transcription from RNA polymerase II promoter	interspecies interaction between organisms
196	6667	AHR	SP1	11622	20683	Ahr	Sp1	0	0	1	1	0	0	0	0	0	ext	0.0121611	3.08506e-05	4.8	2.8	3.82979e-05	3.8	positive regulation of transcription from RNA polymerase II promoter	hemopoiesis
196	6667	AHR	SP1	11622	20683	Ahr	Sp1	0	0	1	1	0	0	0	0	0	ext	0.0121611	3.08506e-05	4.8	2.8	3.82979e-05	3.8	positive regulation of transcription from RNA polymerase II promoter	hemopoietic or lymphoid organ development
196	6667	AHR	SP1	11622	20683	Ahr	Sp1	0	0	1	1	0	0	0	0	0	ext	0.0121611	3.08506e-05	4.8	2.8	3.82979e-05	3.8	positive regulation of transcription from RNA polymerase II promoter	immune system development
196	6667	AHR	SP1	11622	20683	Ahr	Sp1	0	0	1	1	0	0	0	0	0	ext	0.0121611	3.08506e-05	4.8	2.8	3.82979e-05	3.8	positive regulation of transcription from RNA polymerase II promoter	organ morphogenesis
196	6667	AHR	SP1	11622	20683	Ahr	Sp1	0	0	1	1	0	0	0	0	0	ext	0.0121611	3.08506e-05	4.8	2.8	3.82979e-05	3.8	positive regulation of transcription from RNA polymerase II promoter	embryonic development
196	6667	AHR	SP1	11622	20683	Ahr	Sp1	0	0	1	1	0	0	0	0	0	ext	0.0121611	3.08506e-05	4.8	2.8	3.82979e-05	3.8	positive regulation of transcription from RNA polymerase II promoter	homeostatic process
196	6667	AHR	SP1	11622	20683	Ahr	Sp1	0	0	1	1	0	0	0	0	0	ext	0.0121611	3.08506e-05	4.8	2.8	3.82979e-05	3.8	positive regulation of transcription from RNA polymerase II promoter	anatomical structure formation
196	6667	AHR	SP1	11622	20683	Ahr	Sp1	0	0	1	1	0	0	0	0	0	ext	0.0121611	3.08506e-05	4.8	2.8	3.82979e-05	3.8	anatomical structure formation	positive regulation of transcription from RNA polymerase II promoter
196	6667	AHR	SP1	11622	20683	Ahr	Sp1	0	0	1	1	0	0	0	0	0	ext	0.0121611	3.08506e-05	4.8	2.8	3.82979e-05	3.8	anatomical structure formation	interspecies interaction between organisms
196	6667	AHR	SP1	11622	20683	Ahr	Sp1	0	0	1	1	0	0	0	0	0	ext	0.0121611	3.08506e-05	4.8	2.8	3.82979e-05	3.8	anatomical structure formation	hemopoiesis
196	6667	AHR	SP1	11622	20683	Ahr	Sp1	0	0	1	1	0	0	0	0	0	ext	0.0121611	3.08506e-05	4.8	2.8	3.82979e-05	3.8	anatomical structure formation	hemopoietic or lymphoid organ development
196	6667	AHR	SP1	11622	20683	Ahr	Sp1	0	0	1	1	0	0	0	0	0	ext	0.0121611	3.08506e-05	4.8	2.8	3.82979e-05	3.8	anatomical structure formation	immune system development
196	6667	AHR	SP1	11622	20683	Ahr	Sp1	0	0	1	1	0	0	0	0	0	ext	0.0121611	3.08506e-05	4.8	2.8	3.82979e-05	3.8	anatomical structure formation	organ morphogenesis
196	6667	AHR	SP1	11622	20683	Ahr	Sp1	0	0	1	1	0	0	0	0	0	ext	0.0121611	3.08506e-05	4.8	2.8	3.82979e-05	3.8	anatomical structure formation	embryonic development
196	6667	AHR	SP1	11622	20683	Ahr	Sp1	0	0	1	1	0	0	0	0	0	ext	0.0121611	3.08506e-05	4.8	2.8	3.82979e-05	3.8	anatomical structure formation	homeostatic process
196	6667	AHR	SP1	11622	20683	Ahr	Sp1	0	0	1	1	0	0	0	0	0	ext	0.0121611	3.08506e-05	4.8	2.8	3.82979e-05	3.8	anatomical structure formation	anatomical structure formation
207	2033	AKT1	EP300	11651	328572	Akt1	Ep300	0	0	1	1	0	0	0	0	0	ext	0.0662924	0.0181655	10.3	5.6	0.0224428	7	response to organic substance	positive regulation of transcription from RNA polymerase II promoter
207	2033	AKT1	EP300	11651	328572	Akt1	Ep300	0	0	1	1	0	0	0	0	0	ext	0.0662924	0.0181655	10.3	5.6	0.0224428	7	response to organic substance	chromatin modification
207	2033	AKT1	EP300	11651	328572	Akt1	Ep300	0	0	1	1	0	0	0	0	0	ext	0.0662924	0.0181655	10.3	5.6	0.0224428	7	response to organic substance	chromatin organization
207	2033	AKT1	EP300	11651	328572	Akt1	Ep300	0	0	1	1	0	0	0	0	0	ext	0.0662924	0.0181655	10.3	5.6	0.0224428	7	response to organic substance	interspecies interaction between organisms
207	2033	AKT1	EP300	11651	328572	Akt1	Ep300	0	0	1	1	0	0	0	0	0	ext	0.0662924	0.0181655	10.3	5.6	0.0224428	7	response to organic substance	organ morphogenesis
207	2033	AKT1	EP300	11651	328572	Akt1	Ep300	0	0	1	1	0	0	0	0	0	ext	0.0662924	0.0181655	10.3	5.6	0.0224428	7	response to organic substance	embryonic development
207	2033	AKT1	EP300	11651	328572	Akt1	Ep300	0	0	1	1	0	0	0	0	0	ext	0.0662924	0.0181655	10.3	5.6	0.0224428	7	response to organic substance	homeostatic process
207	2033	AKT1	EP300	11651	328572	Akt1	Ep300	0	0	1	1	0	0	0	0	0	ext	0.0662924	0.0181655	10.3	5.6	0.0224428	7	response to organic substance	positive regulation of molecular function
207	2033	AKT1	EP300	11651	328572	Akt1	Ep300	0	0	1	1	0	0	0	0	0	ext	0.0662924	0.0181655	10.3	5.6	0.0224428	7	response to organic substance	tissue development
207	2033	AKT1	EP300	11651	328572	Akt1	Ep300	0	0	1	1	0	0	0	0	0	ext	0.0662924	0.0181655	10.3	5.6	0.0224428	7	mitotic cell cycle	positive regulation of transcription from RNA polymerase II promoter
207	2033	AKT1	EP300	11651	328572	Akt1	Ep300	0	0	1	1	0	0	0	0	0	ext	0.0662924	0.0181655	10.3	5.6	0.0224428	7	mitotic cell cycle	chromatin modification
207	2033	AKT1	EP300	11651	328572	Akt1	Ep300	0	0	1	1	0	0	0	0	0	ext	0.0662924	0.0181655	10.3	5.6	0.0224428	7	mitotic cell cycle	chromatin organization
207	2033	AKT1	EP300	11651	328572	Akt1	Ep300	0	0	1	1	0	0	0	0	0	ext	0.0662924	0.0181655	10.3	5.6	0.0224428	7	mitotic cell cycle	interspecies interaction between organisms
207	2033	AKT1	EP300	11651	328572	Akt1	Ep300	0	0	1	1	0	0	0	0	0	ext	0.0662924	0.0181655	10.3	5.6	0.0224428	7	mitotic cell cycle	organ morphogenesis
207	2033	AKT1	EP300	11651	328572	Akt1	Ep300	0	0	1	1	0	0	0	0	0	ext	0.0662924	0.0181655	10.3	5.6	0.0224428	7	mitotic cell cycle	embryonic development
207	2033	AKT1	EP300	11651	328572	Akt1	Ep300	0	0	1	1	0	0	0	0	0	ext	0.0662924	0.0181655	10.3	5.6	0.0224428	7	mitotic cell cycle	homeostatic process
207	2033	AKT1	EP300	11651	328572	Akt1	Ep300	0	0	1	1	0	0	0	0	0	ext	0.0662924	0.0181655	10.3	5.6	0.0224428	7	mitotic cell cycle	positive regulation of molecular function
207	2033	AKT1	EP300	11651	328572	Akt1	Ep300	0	0	1	1	0	0	0	0	0	ext	0.0662924	0.0181655	10.3	5.6	0.0224428	7	mitotic cell cycle	tissue development
207	2033	AKT1	EP300	11651	328572	Akt1	Ep300	0	0	1	1	0	0	0	0	0	ext	0.0662924	0.0181655	10.3	5.6	0.0224428	7	homeostatic process	positive regulation of transcription from RNA polymerase II promoter
207	2033	AKT1	EP300	11651	328572	Akt1	Ep300	0	0	1	1	0	0	0	0	0	ext	0.0662924	0.0181655	10.3	5.6	0.0224428	7	homeostatic process	chromatin modification
207	2033	AKT1	EP300	11651	328572	Akt1	Ep300	0	0	1	1	0	0	0	0	0	ext	0.0662924	0.0181655	10.3	5.6	0.0224428	7	homeostatic process	chromatin organization
207	2033	AKT1	EP300	11651	328572	Akt1	Ep300	0	0	1	1	0	0	0	0	0	ext	0.0662924	0.0181655	10.3	5.6	0.0224428	7	homeostatic process	interspecies interaction between organisms
207	2033	AKT1	EP300	11651	328572	Akt1	Ep300	0	0	1	1	0	0	0	0	0	ext	0.0662924	0.0181655	10.3	5.6	0.0224428	7	homeostatic process	organ morphogenesis
207	2033	AKT1	EP300	11651	328572	Akt1	Ep300	0	0	1	1	0	0	0	0	0	ext	0.0662924	0.0181655	10.3	5.6	0.0224428	7	homeostatic process	embryonic development
207	2033	AKT1	EP300	11651	328572	Akt1	Ep300	0	0	1	1	0	0	0	0	0	ext	0.0662924	0.0181655	10.3	5.6	0.0224428	7	homeostatic process	homeostatic process
207	2033	AKT1	EP300	11651	328572	Akt1	Ep300	0	0	1	1	0	0	0	0	0	ext	0.0662924	0.0181655	10.3	5.6	0.0224428	7	homeostatic process	positive regulation of molecular function
207	2033	AKT1	EP300	11651	328572	Akt1	Ep300	0	0	1	1	0	0	0	0	0	ext	0.0662924	0.0181655	10.3	5.6	0.0224428	7	homeostatic process	tissue development
207	2033	AKT1	EP300	11651	328572	Akt1	Ep300	0	0	1	1	0	0	0	0	0	ext	0.0662924	0.0181655	10.3	5.6	0.0224428	7	protein amino acid phosphorylation	positive regulation of transcription from RNA polymerase II promoter
207	2033	AKT1	EP300	11651	328572	Akt1	Ep300	0	0	1	1	0	0	0	0	0	ext	0.0662924	0.0181655	10.3	5.6	0.0224428	7	protein amino acid phosphorylation	chromatin modification
207	2033	AKT1	EP300	11651	328572	Akt1	Ep300	0	0	1	1	0	0	0	0	0	ext	0.0662924	0.0181655	10.3	5.6	0.0224428	7	protein amino acid phosphorylation	chromatin organization
207	2033	AKT1	EP300	11651	328572	Akt1	Ep300	0	0	1	1	0	0	0	0	0	ext	0.0662924	0.0181655	10.3	5.6	0.0224428	7	protein amino acid phosphorylation	interspecies interaction between organisms
207	2033	AKT1	EP300	11651	328572	Akt1	Ep300	0	0	1	1	0	0	0	0	0	ext	0.0662924	0.0181655	10.3	5.6	0.0224428	7	protein amino acid phosphorylation	organ morphogenesis
207	2033	AKT1	EP300	11651	328572	Akt1	Ep300	0	0	1	1	0	0	0	0	0	ext	0.0662924	0.0181655	10.3	5.6	0.0224428	7	protein amino acid phosphorylation	embryonic development
207	2033	AKT1	EP300	11651	328572	Akt1	Ep300	0	0	1	1	0	0	0	0	0	ext	0.0662924	0.0181655	10.3	5.6	0.0224428	7	protein amino acid phosphorylation	homeostatic process
207	2033	AKT1	EP300	11651	328572	Akt1	Ep300	0	0	1	1	0	0	0	0	0	ext	0.0662924	0.0181655	10.3	5.6	0.0224428	7	protein amino acid phosphorylation	positive regulation of molecular function
207	2033	AKT1	EP300	11651	328572	Akt1	Ep300	0	0	1	1	0	0	0	0	0	ext	0.0662924	0.0181655	10.3	5.6	0.0224428	7	protein amino acid phosphorylation	tissue development
207	2033	AKT1	EP300	11651	328572	Akt1	Ep300	0	0	1	1	0	0	0	0	0	ext	0.0662924	0.0181655	10.3	5.6	0.0224428	7	intracellular signaling cascade	positive regulation of transcription from RNA polymerase II promoter
207	2033	AKT1	EP300	11651	328572	Akt1	Ep300	0	0	1	1	0	0	0	0	0	ext	0.0662924	0.0181655	10.3	5.6	0.0224428	7	intracellular signaling cascade	chromatin modification
207	2033	AKT1	EP300	11651	328572	Akt1	Ep300	0	0	1	1	0	0	0	0	0	ext	0.0662924	0.0181655	10.3	5.6	0.0224428	7	intracellular signaling cascade	chromatin organization
207	2033	AKT1	EP300	11651	328572	Akt1	Ep300	0	0	1	1	0	0	0	0	0	ext	0.0662924	0.0181655	10.3	5.6	0.0224428	7	intracellular signaling cascade	interspecies interaction between organisms
207	2033	AKT1	EP300	11651	328572	Akt1	Ep300	0	0	1	1	0	0	0	0	0	ext	0.0662924	0.0181655	10.3	5.6	0.0224428	7	intracellular signaling cascade	organ morphogenesis
207	2033	AKT1	EP300	11651	328572	Akt1	Ep300	0	0	1	1	0	0	0	0	0	ext	0.0662924	0.0181655	10.3	5.6	0.0224428	7	intracellular signaling cascade	embryonic development
207	2033	AKT1	EP300	11651	328572	Akt1	Ep300	0	0	1	1	0	0	0	0	0	ext	0.0662924	0.0181655	10.3	5.6	0.0224428	7	intracellular signaling cascade	homeostatic process
207	2033	AKT1	EP300	11651	328572	Akt1	Ep300	0	0	1	1	0	0	0	0	0	ext	0.0662924	0.0181655	10.3	5.6	0.0224428	7	intracellular signaling cascade	positive regulation of molecular function
207	2033	AKT1	EP300	11651	328572	Akt1	Ep300	0	0	1	1	0	0	0	0	0	ext	0.0662924	0.0181655	10.3	5.6	0.0224428	7	intracellular signaling cascade	tissue development
207	2033	AKT1	EP300	11651	328572	Akt1	Ep300	0	0	1	1	0	0	0	0	0	ext	0.0662924	0.0181655	10.3	5.6	0.0224428	7	positive regulation of molecular function	positive regulation of transcription from RNA polymerase II promoter
207	2033	AKT1	EP300	11651	328572	Akt1	Ep300	0	0	1	1	0	0	0	0	0	ext	0.0662924	0.0181655	10.3	5.6	0.0224428	7	positive regulation of molecular function	chromatin modification
207	2033	AKT1	EP300	11651	328572	Akt1	Ep300	0	0	1	1	0	0	0	0	0	ext	0.0662924	0.0181655	10.3	5.6	0.0224428	7	positive regulation of molecular function	chromatin organization
207	2033	AKT1	EP300	11651	328572	Akt1	Ep300	0	0	1	1	0	0	0	0	0	ext	0.0662924	0.0181655	10.3	5.6	0.0224428	7	positive regulation of molecular function	interspecies interaction between organisms
207	2033	AKT1	EP300	11651	328572	Akt1	Ep300	0	0	1	1	0	0	0	0	0	ext	0.0662924	0.0181655	10.3	5.6	0.0224428	7	positive regulation of molecular function	organ morphogenesis
207	2033	AKT1	EP300	11651	328572	Akt1	Ep300	0	0	1	1	0	0	0	0	0	ext	0.0662924	0.0181655	10.3	5.6	0.0224428	7	positive regulation of molecular function	embryonic development
207	2033	AKT1	EP300	11651	328572	Akt1	Ep300	0	0	1	1	0	0	0	0	0	ext	0.0662924	0.0181655	10.3	5.6	0.0224428	7	positive regulation of molecular function	homeostatic process
207	2033	AKT1	EP300	11651	328572	Akt1	Ep300	0	0	1	1	0	0	0	0	0	ext	0.0662924	0.0181655	10.3	5.6	0.0224428	7	positive regulation of molecular function	positive regulation of molecular function
207	2033	AKT1	EP300	11651	328572	Akt1	Ep300	0	0	1	1	0	0	0	0	0	ext	0.0662924	0.0181655	10.3	5.6	0.0224428	7	positive regulation of molecular function	tissue development
207	2033	AKT1	EP300	11651	328572	Akt1	Ep300	0	0	1	1	0	0	0	0	0	ext	0.0662924	0.0181655	10.3	5.6	0.0224428	7	modification-dependent protein catabolic process	positive regulation of transcription from RNA polymerase II promoter
207	2033	AKT1	EP300	11651	328572	Akt1	Ep300	0	0	1	1	0	0	0	0	0	ext	0.0662924	0.0181655	10.3	5.6	0.0224428	7	modification-dependent protein catabolic process	chromatin modification
207	2033	AKT1	EP300	11651	328572	Akt1	Ep300	0	0	1	1	0	0	0	0	0	ext	0.0662924	0.0181655	10.3	5.6	0.0224428	7	modification-dependent protein catabolic process	chromatin organization
207	2033	AKT1	EP300	11651	328572	Akt1	Ep300	0	0	1	1	0	0	0	0	0	ext	0.0662924	0.0181655	10.3	5.6	0.0224428	7	modification-dependent protein catabolic process	interspecies interaction between organisms
207	2033	AKT1	EP300	11651	328572	Akt1	Ep300	0	0	1	1	0	0	0	0	0	ext	0.0662924	0.0181655	10.3	5.6	0.0224428	7	modification-dependent protein catabolic process	organ morphogenesis
207	2033	AKT1	EP300	11651	328572	Akt1	Ep300	0	0	1	1	0	0	0	0	0	ext	0.0662924	0.0181655	10.3	5.6	0.0224428	7	modification-dependent protein catabolic process	embryonic development
207	2033	AKT1	EP300	11651	328572	Akt1	Ep300	0	0	1	1	0	0	0	0	0	ext	0.0662924	0.0181655	10.3	5.6	0.0224428	7	modification-dependent protein catabolic process	homeostatic process
207	2033	AKT1	EP300	11651	328572	Akt1	Ep300	0	0	1	1	0	0	0	0	0	ext	0.0662924	0.0181655	10.3	5.6	0.0224428	7	modification-dependent protein catabolic process	positive regulation of molecular function
207	2033	AKT1	EP300	11651	328572	Akt1	Ep300	0	0	1	1	0	0	0	0	0	ext	0.0662924	0.0181655	10.3	5.6	0.0224428	7	modification-dependent protein catabolic process	tissue development
207	2033	AKT1	EP300	11651	328572	Akt1	Ep300	0	0	1	1	0	0	0	0	0	ext	0.0662924	0.0181655	10.3	5.6	0.0224428	7	modification-dependent macromolecule catabolic process	positive regulation of transcription from RNA polymerase II promoter
207	2033	AKT1	EP300	11651	328572	Akt1	Ep300	0	0	1	1	0	0	0	0	0	ext	0.0662924	0.0181655	10.3	5.6	0.0224428	7	modification-dependent macromolecule catabolic process	chromatin modification
207	2033	AKT1	EP300	11651	328572	Akt1	Ep300	0	0	1	1	0	0	0	0	0	ext	0.0662924	0.0181655	10.3	5.6	0.0224428	7	modification-dependent macromolecule catabolic process	chromatin organization
207	2033	AKT1	EP300	11651	328572	Akt1	Ep300	0	0	1	1	0	0	0	0	0	ext	0.0662924	0.0181655	10.3	5.6	0.0224428	7	modification-dependent macromolecule catabolic process	interspecies interaction between organisms
207	2033	AKT1	EP300	11651	328572	Akt1	Ep300	0	0	1	1	0	0	0	0	0	ext	0.0662924	0.0181655	10.3	5.6	0.0224428	7	modification-dependent macromolecule catabolic process	organ morphogenesis
207	2033	AKT1	EP300	11651	328572	Akt1	Ep300	0	0	1	1	0	0	0	0	0	ext	0.0662924	0.0181655	10.3	5.6	0.0224428	7	modification-dependent macromolecule catabolic process	embryonic development
207	2033	AKT1	EP300	11651	328572	Akt1	Ep300	0	0	1	1	0	0	0	0	0	ext	0.0662924	0.0181655	10.3	5.6	0.0224428	7	modification-dependent macromolecule catabolic process	homeostatic process
207	2033	AKT1	EP300	11651	328572	Akt1	Ep300	0	0	1	1	0	0	0	0	0	ext	0.0662924	0.0181655	10.3	5.6	0.0224428	7	modification-dependent macromolecule catabolic process	positive regulation of molecular function
207	2033	AKT1	EP300	11651	328572	Akt1	Ep300	0	0	1	1	0	0	0	0	0	ext	0.0662924	0.0181655	10.3	5.6	0.0224428	7	modification-dependent macromolecule catabolic process	tissue development
207	2033	AKT1	EP300	11651	328572	Akt1	Ep300	0	0	1	1	0	0	0	0	0	ext	0.0662924	0.0181655	10.3	5.6	0.0224428	7	tissue development	positive regulation of transcription from RNA polymerase II promoter
207	2033	AKT1	EP300	11651	328572	Akt1	Ep300	0	0	1	1	0	0	0	0	0	ext	0.0662924	0.0181655	10.3	5.6	0.0224428	7	tissue development	chromatin modification
207	2033	AKT1	EP300	11651	328572	Akt1	Ep300	0	0	1	1	0	0	0	0	0	ext	0.0662924	0.0181655	10.3	5.6	0.0224428	7	tissue development	chromatin organization
207	2033	AKT1	EP300	11651	328572	Akt1	Ep300	0	0	1	1	0	0	0	0	0	ext	0.0662924	0.0181655	10.3	5.6	0.0224428	7	tissue development	interspecies interaction between organisms
207	2033	AKT1	EP300	11651	328572	Akt1	Ep300	0	0	1	1	0	0	0	0	0	ext	0.0662924	0.0181655	10.3	5.6	0.0224428	7	tissue development	organ morphogenesis
207	2033	AKT1	EP300	11651	328572	Akt1	Ep300	0	0	1	1	0	0	0	0	0	ext	0.0662924	0.0181655	10.3	5.6	0.0224428	7	tissue development	embryonic development
207	2033	AKT1	EP300	11651	328572	Akt1	Ep300	0	0	1	1	0	0	0	0	0	ext	0.0662924	0.0181655	10.3	5.6	0.0224428	7	tissue development	homeostatic process
207	2033	AKT1	EP300	11651	328572	Akt1	Ep300	0	0	1	1	0	0	0	0	0	ext	0.0662924	0.0181655	10.3	5.6	0.0224428	7	tissue development	positive regulation of molecular function
207	2033	AKT1	EP300	11651	328572	Akt1	Ep300	0	0	1	1	0	0	0	0	0	ext	0.0662924	0.0181655	10.3	5.6	0.0224428	7	tissue development	tissue development
207	2033	AKT1	EP300	11651	328572	Akt1	Ep300	0	0	1	1	0	0	0	0	0	ext	0.0662924	0.0181655	10.3	5.6	0.0224428	7	cellular protein catabolic process	positive regulation of transcription from RNA polymerase II promoter
207	2033	AKT1	EP300	11651	328572	Akt1	Ep300	0	0	1	1	0	0	0	0	0	ext	0.0662924	0.0181655	10.3	5.6	0.0224428	7	cellular protein catabolic process	chromatin modification
207	2033	AKT1	EP300	11651	328572	Akt1	Ep300	0	0	1	1	0	0	0	0	0	ext	0.0662924	0.0181655	10.3	5.6	0.0224428	7	cellular protein catabolic process	chromatin organization
207	2033	AKT1	EP300	11651	328572	Akt1	Ep300	0	0	1	1	0	0	0	0	0	ext	0.0662924	0.0181655	10.3	5.6	0.0224428	7	cellular protein catabolic process	interspecies interaction between organisms
207	2033	AKT1	EP300	11651	328572	Akt1	Ep300	0	0	1	1	0	0	0	0	0	ext	0.0662924	0.0181655	10.3	5.6	0.0224428	7	cellular protein catabolic process	organ morphogenesis
207	2033	AKT1	EP300	11651	328572	Akt1	Ep300	0	0	1	1	0	0	0	0	0	ext	0.0662924	0.0181655	10.3	5.6	0.0224428	7	cellular protein catabolic process	embryonic development
207	2033	AKT1	EP300	11651	328572	Akt1	Ep300	0	0	1	1	0	0	0	0	0	ext	0.0662924	0.0181655	10.3	5.6	0.0224428	7	cellular protein catabolic process	homeostatic process
207	2033	AKT1	EP300	11651	328572	Akt1	Ep300	0	0	1	1	0	0	0	0	0	ext	0.0662924	0.0181655	10.3	5.6	0.0224428	7	cellular protein catabolic process	positive regulation of molecular function
207	2033	AKT1	EP300	11651	328572	Akt1	Ep300	0	0	1	1	0	0	0	0	0	ext	0.0662924	0.0181655	10.3	5.6	0.0224428	7	cellular protein catabolic process	tissue development
207	2033	AKT1	EP300	11651	328572	Akt1	Ep300	0	0	1	1	0	0	0	0	0	ext	0.0662924	0.0181655	10.3	5.6	0.0224428	7	proteolysis involved in cellular protein catabolic process	positive regulation of transcription from RNA polymerase II promoter
207	2033	AKT1	EP300	11651	328572	Akt1	Ep300	0	0	1	1	0	0	0	0	0	ext	0.0662924	0.0181655	10.3	5.6	0.0224428	7	proteolysis involved in cellular protein catabolic process	chromatin modification
207	2033	AKT1	EP300	11651	328572	Akt1	Ep300	0	0	1	1	0	0	0	0	0	ext	0.0662924	0.0181655	10.3	5.6	0.0224428	7	proteolysis involved in cellular protein catabolic process	chromatin organization
207	2033	AKT1	EP300	11651	328572	Akt1	Ep300	0	0	1	1	0	0	0	0	0	ext	0.0662924	0.0181655	10.3	5.6	0.0224428	7	proteolysis involved in cellular protein catabolic process	interspecies interaction between organisms
207	2033	AKT1	EP300	11651	328572	Akt1	Ep300	0	0	1	1	0	0	0	0	0	ext	0.0662924	0.0181655	10.3	5.6	0.0224428	7	proteolysis involved in cellular protein catabolic process	organ morphogenesis
207	2033	AKT1	EP300	11651	328572	Akt1	Ep300	0	0	1	1	0	0	0	0	0	ext	0.0662924	0.0181655	10.3	5.6	0.0224428	7	proteolysis involved in cellular protein catabolic process	embryonic development
207	2033	AKT1	EP300	11651	328572	Akt1	Ep300	0	0	1	1	0	0	0	0	0	ext	0.0662924	0.0181655	10.3	5.6	0.0224428	7	proteolysis involved in cellular protein catabolic process	homeostatic process
207	2033	AKT1	EP300	11651	328572	Akt1	Ep300	0	0	1	1	0	0	0	0	0	ext	0.0662924	0.0181655	10.3	5.6	0.0224428	7	proteolysis involved in cellular protein catabolic process	positive regulation of molecular function
207	2033	AKT1	EP300	11651	328572	Akt1	Ep300	0	0	1	1	0	0	0	0	0	ext	0.0662924	0.0181655	10.3	5.6	0.0224428	7	proteolysis involved in cellular protein catabolic process	tissue development
207	2033	AKT1	EP300	11651	328572	Akt1	Ep300	0	0	1	1	0	0	0	0	0	ext	0.0662924	0.0181655	10.3	5.6	0.0224428	7	negative regulation of developmental process	positive regulation of transcription from RNA polymerase II promoter
207	2033	AKT1	EP300	11651	328572	Akt1	Ep300	0	0	1	1	0	0	0	0	0	ext	0.0662924	0.0181655	10.3	5.6	0.0224428	7	negative regulation of developmental process	chromatin modification
207	2033	AKT1	EP300	11651	328572	Akt1	Ep300	0	0	1	1	0	0	0	0	0	ext	0.0662924	0.0181655	10.3	5.6	0.0224428	7	negative regulation of developmental process	chromatin organization
207	2033	AKT1	EP300	11651	328572	Akt1	Ep300	0	0	1	1	0	0	0	0	0	ext	0.0662924	0.0181655	10.3	5.6	0.0224428	7	negative regulation of developmental process	interspecies interaction between organisms
207	2033	AKT1	EP300	11651	328572	Akt1	Ep300	0	0	1	1	0	0	0	0	0	ext	0.0662924	0.0181655	10.3	5.6	0.0224428	7	negative regulation of developmental process	organ morphogenesis
207	2033	AKT1	EP300	11651	328572	Akt1	Ep300	0	0	1	1	0	0	0	0	0	ext	0.0662924	0.0181655	10.3	5.6	0.0224428	7	negative regulation of developmental process	embryonic development
207	2033	AKT1	EP300	11651	328572	Akt1	Ep300	0	0	1	1	0	0	0	0	0	ext	0.0662924	0.0181655	10.3	5.6	0.0224428	7	negative regulation of developmental process	homeostatic process
207	2033	AKT1	EP300	11651	328572	Akt1	Ep300	0	0	1	1	0	0	0	0	0	ext	0.0662924	0.0181655	10.3	5.6	0.0224428	7	negative regulation of developmental process	positive regulation of molecular function
207	2033	AKT1	EP300	11651	328572	Akt1	Ep300	0	0	1	1	0	0	0	0	0	ext	0.0662924	0.0181655	10.3	5.6	0.0224428	7	negative regulation of developmental process	tissue development
207	2033	AKT1	EP300	11651	328572	Akt1	Ep300	0	0	1	1	0	0	0	0	0	ext	0.0662924	0.0181655	10.3	5.6	0.0224428	7	response to external stimulus	positive regulation of transcription from RNA polymerase II promoter
207	2033	AKT1	EP300	11651	328572	Akt1	Ep300	0	0	1	1	0	0	0	0	0	ext	0.0662924	0.0181655	10.3	5.6	0.0224428	7	response to external stimulus	chromatin modification
207	2033	AKT1	EP300	11651	328572	Akt1	Ep300	0	0	1	1	0	0	0	0	0	ext	0.0662924	0.0181655	10.3	5.6	0.0224428	7	response to external stimulus	chromatin organization
207	2033	AKT1	EP300	11651	328572	Akt1	Ep300	0	0	1	1	0	0	0	0	0	ext	0.0662924	0.0181655	10.3	5.6	0.0224428	7	response to external stimulus	interspecies interaction between organisms
207	2033	AKT1	EP300	11651	328572	Akt1	Ep300	0	0	1	1	0	0	0	0	0	ext	0.0662924	0.0181655	10.3	5.6	0.0224428	7	response to external stimulus	organ morphogenesis
207	2033	AKT1	EP300	11651	328572	Akt1	Ep300	0	0	1	1	0	0	0	0	0	ext	0.0662924	0.0181655	10.3	5.6	0.0224428	7	response to external stimulus	embryonic development
207	2033	AKT1	EP300	11651	328572	Akt1	Ep300	0	0	1	1	0	0	0	0	0	ext	0.0662924	0.0181655	10.3	5.6	0.0224428	7	response to external stimulus	homeostatic process
207	2033	AKT1	EP300	11651	328572	Akt1	Ep300	0	0	1	1	0	0	0	0	0	ext	0.0662924	0.0181655	10.3	5.6	0.0224428	7	response to external stimulus	positive regulation of molecular function
207	2033	AKT1	EP300	11651	328572	Akt1	Ep300	0	0	1	1	0	0	0	0	0	ext	0.0662924	0.0181655	10.3	5.6	0.0224428	7	response to external stimulus	tissue development
207	2033	AKT1	EP300	11651	328572	Akt1	Ep300	0	0	1	1	0	0	0	0	0	ext	0.0662924	0.0181655	10.3	5.6	0.0224428	7	cell surface receptor linked signal transduction	positive regulation of transcription from RNA polymerase II promoter
207	2033	AKT1	EP300	11651	328572	Akt1	Ep300	0	0	1	1	0	0	0	0	0	ext	0.0662924	0.0181655	10.3	5.6	0.0224428	7	cell surface receptor linked signal transduction	chromatin modification
207	2033	AKT1	EP300	11651	328572	Akt1	Ep300	0	0	1	1	0	0	0	0	0	ext	0.0662924	0.0181655	10.3	5.6	0.0224428	7	cell surface receptor linked signal transduction	chromatin organization
207	2033	AKT1	EP300	11651	328572	Akt1	Ep300	0	0	1	1	0	0	0	0	0	ext	0.0662924	0.0181655	10.3	5.6	0.0224428	7	cell surface receptor linked signal transduction	interspecies interaction between organisms
207	2033	AKT1	EP300	11651	328572	Akt1	Ep300	0	0	1	1	0	0	0	0	0	ext	0.0662924	0.0181655	10.3	5.6	0.0224428	7	cell surface receptor linked signal transduction	organ morphogenesis
207	2033	AKT1	EP300	11651	328572	Akt1	Ep300	0	0	1	1	0	0	0	0	0	ext	0.0662924	0.0181655	10.3	5.6	0.0224428	7	cell surface receptor linked signal transduction	embryonic development
207	2033	AKT1	EP300	11651	328572	Akt1	Ep300	0	0	1	1	0	0	0	0	0	ext	0.0662924	0.0181655	10.3	5.6	0.0224428	7	cell surface receptor linked signal transduction	homeostatic process
207	2033	AKT1	EP300	11651	328572	Akt1	Ep300	0	0	1	1	0	0	0	0	0	ext	0.0662924	0.0181655	10.3	5.6	0.0224428	7	cell surface receptor linked signal transduction	positive regulation of molecular function
207	2033	AKT1	EP300	11651	328572	Akt1	Ep300	0	0	1	1	0	0	0	0	0	ext	0.0662924	0.0181655	10.3	5.6	0.0224428	7	cell surface receptor linked signal transduction	tissue development
207	3320	AKT1	HSP90AA1	11651	15519	Akt1	Hsp90aa1	0	0	1	1	0	0	0	0	0	ext	0.0662924	0	10.3	19.2	0	18.5	response to organic substance	response to organic substance
207	3320	AKT1	HSP90AA1	11651	15519	Akt1	Hsp90aa1	0	0	1	1	0	0	0	0	0	ext	0.0662924	0	10.3	19.2	0	18.5	response to organic substance	anatomical structure formation
207	3320	AKT1	HSP90AA1	11651	15519	Akt1	Hsp90aa1	0	0	1	1	0	0	0	0	0	ext	0.0662924	0	10.3	19.2	0	18.5	mitotic cell cycle	response to organic substance
207	3320	AKT1	HSP90AA1	11651	15519	Akt1	Hsp90aa1	0	0	1	1	0	0	0	0	0	ext	0.0662924	0	10.3	19.2	0	18.5	mitotic cell cycle	anatomical structure formation
207	3320	AKT1	HSP90AA1	11651	15519	Akt1	Hsp90aa1	0	0	1	1	0	0	0	0	0	ext	0.0662924	0	10.3	19.2	0	18.5	homeostatic process	response to organic substance
207	3320	AKT1	HSP90AA1	11651	15519	Akt1	Hsp90aa1	0	0	1	1	0	0	0	0	0	ext	0.0662924	0	10.3	19.2	0	18.5	homeostatic process	anatomical structure formation
207	3320	AKT1	HSP90AA1	11651	15519	Akt1	Hsp90aa1	0	0	1	1	0	0	0	0	0	ext	0.0662924	0	10.3	19.2	0	18.5	protein amino acid phosphorylation	response to organic substance
207	3320	AKT1	HSP90AA1	11651	15519	Akt1	Hsp90aa1	0	0	1	1	0	0	0	0	0	ext	0.0662924	0	10.3	19.2	0	18.5	protein amino acid phosphorylation	anatomical structure formation
207	3320	AKT1	HSP90AA1	11651	15519	Akt1	Hsp90aa1	0	0	1	1	0	0	0	0	0	ext	0.0662924	0	10.3	19.2	0	18.5	intracellular signaling cascade	response to organic substance
207	3320	AKT1	HSP90AA1	11651	15519	Akt1	Hsp90aa1	0	0	1	1	0	0	0	0	0	ext	0.0662924	0	10.3	19.2	0	18.5	intracellular signaling cascade	anatomical structure formation
207	3320	AKT1	HSP90AA1	11651	15519	Akt1	Hsp90aa1	0	0	1	1	0	0	0	0	0	ext	0.0662924	0	10.3	19.2	0	18.5	positive regulation of molecular function	response to organic substance
207	3320	AKT1	HSP90AA1	11651	15519	Akt1	Hsp90aa1	0	0	1	1	0	0	0	0	0	ext	0.0662924	0	10.3	19.2	0	18.5	positive regulation of molecular function	anatomical structure formation
207	3320	AKT1	HSP90AA1	11651	15519	Akt1	Hsp90aa1	0	0	1	1	0	0	0	0	0	ext	0.0662924	0	10.3	19.2	0	18.5	modification-dependent protein catabolic process	response to organic substance
207	3320	AKT1	HSP90AA1	11651	15519	Akt1	Hsp90aa1	0	0	1	1	0	0	0	0	0	ext	0.0662924	0	10.3	19.2	0	18.5	modification-dependent protein catabolic process	anatomical structure formation
207	3320	AKT1	HSP90AA1	11651	15519	Akt1	Hsp90aa1	0	0	1	1	0	0	0	0	0	ext	0.0662924	0	10.3	19.2	0	18.5	modification-dependent macromolecule catabolic process	response to organic substance
207	3320	AKT1	HSP90AA1	11651	15519	Akt1	Hsp90aa1	0	0	1	1	0	0	0	0	0	ext	0.0662924	0	10.3	19.2	0	18.5	modification-dependent macromolecule catabolic process	anatomical structure formation
207	3320	AKT1	HSP90AA1	11651	15519	Akt1	Hsp90aa1	0	0	1	1	0	0	0	0	0	ext	0.0662924	0	10.3	19.2	0	18.5	tissue development	response to organic substance
207	3320	AKT1	HSP90AA1	11651	15519	Akt1	Hsp90aa1	0	0	1	1	0	0	0	0	0	ext	0.0662924	0	10.3	19.2	0	18.5	tissue development	anatomical structure formation
207	3320	AKT1	HSP90AA1	11651	15519	Akt1	Hsp90aa1	0	0	1	1	0	0	0	0	0	ext	0.0662924	0	10.3	19.2	0	18.5	cellular protein catabolic process	response to organic substance
207	3320	AKT1	HSP90AA1	11651	15519	Akt1	Hsp90aa1	0	0	1	1	0	0	0	0	0	ext	0.0662924	0	10.3	19.2	0	18.5	cellular protein catabolic process	anatomical structure formation
207	3320	AKT1	HSP90AA1	11651	15519	Akt1	Hsp90aa1	0	0	1	1	0	0	0	0	0	ext	0.0662924	0	10.3	19.2	0	18.5	proteolysis involved in cellular protein catabolic process	response to organic substance
207	3320	AKT1	HSP90AA1	11651	15519	Akt1	Hsp90aa1	0	0	1	1	0	0	0	0	0	ext	0.0662924	0	10.3	19.2	0	18.5	proteolysis involved in cellular protein catabolic process	anatomical structure formation
207	3320	AKT1	HSP90AA1	11651	15519	Akt1	Hsp90aa1	0	0	1	1	0	0	0	0	0	ext	0.0662924	0	10.3	19.2	0	18.5	negative regulation of developmental process	response to organic substance
207	3320	AKT1	HSP90AA1	11651	15519	Akt1	Hsp90aa1	0	0	1	1	0	0	0	0	0	ext	0.0662924	0	10.3	19.2	0	18.5	negative regulation of developmental process	anatomical structure formation
207	3320	AKT1	HSP90AA1	11651	15519	Akt1	Hsp90aa1	0	0	1	1	0	0	0	0	0	ext	0.0662924	0	10.3	19.2	0	18.5	response to external stimulus	response to organic substance
207	3320	AKT1	HSP90AA1	11651	15519	Akt1	Hsp90aa1	0	0	1	1	0	0	0	0	0	ext	0.0662924	0	10.3	19.2	0	18.5	response to external stimulus	anatomical structure formation
207	3320	AKT1	HSP90AA1	11651	15519	Akt1	Hsp90aa1	0	0	1	1	0	0	0	0	0	ext	0.0662924	0	10.3	19.2	0	18.5	cell surface receptor linked signal transduction	response to organic substance
207	3320	AKT1	HSP90AA1	11651	15519	Akt1	Hsp90aa1	0	0	1	1	0	0	0	0	0	ext	0.0662924	0	10.3	19.2	0	18.5	cell surface receptor linked signal transduction	anatomical structure formation
207	367	AKT1	AR	11651	11835	Akt1	Ar	0	0	1	1	0	0	0	0	0	ext	0.0662924	0.0132154	10.3	16.1	0.00292271	14	response to organic substance	positive regulation of transcription from RNA polymerase II promoter
207	367	AKT1	AR	11651	11835	Akt1	Ar	0	0	1	1	0	0	0	0	0	ext	0.0662924	0.0132154	10.3	16.1	0.00292271	14	response to organic substance	embryonic development
207	367	AKT1	AR	11651	11835	Akt1	Ar	0	0	1	1	0	0	0	0	0	ext	0.0662924	0.0132154	10.3	16.1	0.00292271	14	response to organic substance	intracellular signaling cascade
207	367	AKT1	AR	11651	11835	Akt1	Ar	0	0	1	1	0	0	0	0	0	ext	0.0662924	0.0132154	10.3	16.1	0.00292271	14	mitotic cell cycle	positive regulation of transcription from RNA polymerase II promoter
207	367	AKT1	AR	11651	11835	Akt1	Ar	0	0	1	1	0	0	0	0	0	ext	0.0662924	0.0132154	10.3	16.1	0.00292271	14	mitotic cell cycle	embryonic development
207	367	AKT1	AR	11651	11835	Akt1	Ar	0	0	1	1	0	0	0	0	0	ext	0.0662924	0.0132154	10.3	16.1	0.00292271	14	mitotic cell cycle	intracellular signaling cascade
207	367	AKT1	AR	11651	11835	Akt1	Ar	0	0	1	1	0	0	0	0	0	ext	0.0662924	0.0132154	10.3	16.1	0.00292271	14	homeostatic process	positive regulation of transcription from RNA polymerase II promoter
207	367	AKT1	AR	11651	11835	Akt1	Ar	0	0	1	1	0	0	0	0	0	ext	0.0662924	0.0132154	10.3	16.1	0.00292271	14	homeostatic process	embryonic development
207	367	AKT1	AR	11651	11835	Akt1	Ar	0	0	1	1	0	0	0	0	0	ext	0.0662924	0.0132154	10.3	16.1	0.00292271	14	homeostatic process	intracellular signaling cascade
207	367	AKT1	AR	11651	11835	Akt1	Ar	0	0	1	1	0	0	0	0	0	ext	0.0662924	0.0132154	10.3	16.1	0.00292271	14	protein amino acid phosphorylation	positive regulation of transcription from RNA polymerase II promoter
207	367	AKT1	AR	11651	11835	Akt1	Ar	0	0	1	1	0	0	0	0	0	ext	0.0662924	0.0132154	10.3	16.1	0.00292271	14	protein amino acid phosphorylation	embryonic development
207	367	AKT1	AR	11651	11835	Akt1	Ar	0	0	1	1	0	0	0	0	0	ext	0.0662924	0.0132154	10.3	16.1	0.00292271	14	protein amino acid phosphorylation	intracellular signaling cascade
207	367	AKT1	AR	11651	11835	Akt1	Ar	0	0	1	1	0	0	0	0	0	ext	0.0662924	0.0132154	10.3	16.1	0.00292271	14	intracellular signaling cascade	positive regulation of transcription from RNA polymerase II promoter
207	367	AKT1	AR	11651	11835	Akt1	Ar	0	0	1	1	0	0	0	0	0	ext	0.0662924	0.0132154	10.3	16.1	0.00292271	14	intracellular signaling cascade	embryonic development
207	367	AKT1	AR	11651	11835	Akt1	Ar	0	0	1	1	0	0	0	0	0	ext	0.0662924	0.0132154	10.3	16.1	0.00292271	14	intracellular signaling cascade	intracellular signaling cascade
207	367	AKT1	AR	11651	11835	Akt1	Ar	0	0	1	1	0	0	0	0	0	ext	0.0662924	0.0132154	10.3	16.1	0.00292271	14	positive regulation of molecular function	positive regulation of transcription from RNA polymerase II promoter
207	367	AKT1	AR	11651	11835	Akt1	Ar	0	0	1	1	0	0	0	0	0	ext	0.0662924	0.0132154	10.3	16.1	0.00292271	14	positive regulation of molecular function	embryonic development
207	367	AKT1	AR	11651	11835	Akt1	Ar	0	0	1	1	0	0	0	0	0	ext	0.0662924	0.0132154	10.3	16.1	0.00292271	14	positive regulation of molecular function	intracellular signaling cascade
207	367	AKT1	AR	11651	11835	Akt1	Ar	0	0	1	1	0	0	0	0	0	ext	0.0662924	0.0132154	10.3	16.1	0.00292271	14	modification-dependent protein catabolic process	positive regulation of transcription from RNA polymerase II promoter
207	367	AKT1	AR	11651	11835	Akt1	Ar	0	0	1	1	0	0	0	0	0	ext	0.0662924	0.0132154	10.3	16.1	0.00292271	14	modification-dependent protein catabolic process	embryonic development
207	367	AKT1	AR	11651	11835	Akt1	Ar	0	0	1	1	0	0	0	0	0	ext	0.0662924	0.0132154	10.3	16.1	0.00292271	14	modification-dependent protein catabolic process	intracellular signaling cascade
207	367	AKT1	AR	11651	11835	Akt1	Ar	0	0	1	1	0	0	0	0	0	ext	0.0662924	0.0132154	10.3	16.1	0.00292271	14	modification-dependent macromolecule catabolic process	positive regulation of transcription from RNA polymerase II promoter
207	367	AKT1	AR	11651	11835	Akt1	Ar	0	0	1	1	0	0	0	0	0	ext	0.0662924	0.0132154	10.3	16.1	0.00292271	14	modification-dependent macromolecule catabolic process	embryonic development
207	367	AKT1	AR	11651	11835	Akt1	Ar	0	0	1	1	0	0	0	0	0	ext	0.0662924	0.0132154	10.3	16.1	0.00292271	14	modification-dependent macromolecule catabolic process	intracellular signaling cascade
207	367	AKT1	AR	11651	11835	Akt1	Ar	0	0	1	1	0	0	0	0	0	ext	0.0662924	0.0132154	10.3	16.1	0.00292271	14	tissue development	positive regulation of transcription from RNA polymerase II promoter
207	367	AKT1	AR	11651	11835	Akt1	Ar	0	0	1	1	0	0	0	0	0	ext	0.0662924	0.0132154	10.3	16.1	0.00292271	14	tissue development	embryonic development
207	367	AKT1	AR	11651	11835	Akt1	Ar	0	0	1	1	0	0	0	0	0	ext	0.0662924	0.0132154	10.3	16.1	0.00292271	14	tissue development	intracellular signaling cascade
207	367	AKT1	AR	11651	11835	Akt1	Ar	0	0	1	1	0	0	0	0	0	ext	0.0662924	0.0132154	10.3	16.1	0.00292271	14	cellular protein catabolic process	positive regulation of transcription from RNA polymerase II promoter
207	367	AKT1	AR	11651	11835	Akt1	Ar	0	0	1	1	0	0	0	0	0	ext	0.0662924	0.0132154	10.3	16.1	0.00292271	14	cellular protein catabolic process	embryonic development
207	367	AKT1	AR	11651	11835	Akt1	Ar	0	0	1	1	0	0	0	0	0	ext	0.0662924	0.0132154	10.3	16.1	0.00292271	14	cellular protein catabolic process	intracellular signaling cascade
207	367	AKT1	AR	11651	11835	Akt1	Ar	0	0	1	1	0	0	0	0	0	ext	0.0662924	0.0132154	10.3	16.1	0.00292271	14	proteolysis involved in cellular protein catabolic process	positive regulation of transcription from RNA polymerase II promoter
207	367	AKT1	AR	11651	11835	Akt1	Ar	0	0	1	1	0	0	0	0	0	ext	0.0662924	0.0132154	10.3	16.1	0.00292271	14	proteolysis involved in cellular protein catabolic process	embryonic development
207	367	AKT1	AR	11651	11835	Akt1	Ar	0	0	1	1	0	0	0	0	0	ext	0.0662924	0.0132154	10.3	16.1	0.00292271	14	proteolysis involved in cellular protein catabolic process	intracellular signaling cascade
207	367	AKT1	AR	11651	11835	Akt1	Ar	0	0	1	1	0	0	0	0	0	ext	0.0662924	0.0132154	10.3	16.1	0.00292271	14	negative regulation of developmental process	positive regulation of transcription from RNA polymerase II promoter
207	367	AKT1	AR	11651	11835	Akt1	Ar	0	0	1	1	0	0	0	0	0	ext	0.0662924	0.0132154	10.3	16.1	0.00292271	14	negative regulation of developmental process	embryonic development
207	367	AKT1	AR	11651	11835	Akt1	Ar	0	0	1	1	0	0	0	0	0	ext	0.0662924	0.0132154	10.3	16.1	0.00292271	14	negative regulation of developmental process	intracellular signaling cascade
207	367	AKT1	AR	11651	11835	Akt1	Ar	0	0	1	1	0	0	0	0	0	ext	0.0662924	0.0132154	10.3	16.1	0.00292271	14	response to external stimulus	positive regulation of transcription from RNA polymerase II promoter
207	367	AKT1	AR	11651	11835	Akt1	Ar	0	0	1	1	0	0	0	0	0	ext	0.0662924	0.0132154	10.3	16.1	0.00292271	14	response to external stimulus	embryonic development
207	367	AKT1	AR	11651	11835	Akt1	Ar	0	0	1	1	0	0	0	0	0	ext	0.0662924	0.0132154	10.3	16.1	0.00292271	14	response to external stimulus	intracellular signaling cascade
207	367	AKT1	AR	11651	11835	Akt1	Ar	0	0	1	1	0	0	0	0	0	ext	0.0662924	0.0132154	10.3	16.1	0.00292271	14	cell surface receptor linked signal transduction	positive regulation of transcription from RNA polymerase II promoter
207	367	AKT1	AR	11651	11835	Akt1	Ar	0	0	1	1	0	0	0	0	0	ext	0.0662924	0.0132154	10.3	16.1	0.00292271	14	cell surface receptor linked signal transduction	embryonic development
207	367	AKT1	AR	11651	11835	Akt1	Ar	0	0	1	1	0	0	0	0	0	ext	0.0662924	0.0132154	10.3	16.1	0.00292271	14	cell surface receptor linked signal transduction	intracellular signaling cascade
207	2932	AKT1	GSK3B	11651	56637	Akt1	Gsk3b	0	0	1	1	0	0	1	0	1	ext	0.0662924	0.0032	10.3	3.5	0.0342273	5.2	response to organic substance	organ morphogenesis
207	2932	AKT1	GSK3B	11651	56637	Akt1	Gsk3b	0	0	1	1	0	0	1	0	1	ext	0.0662924	0.0032	10.3	3.5	0.0342273	5.2	response to organic substance	protein amino acid phosphorylation
207	2932	AKT1	GSK3B	11651	56637	Akt1	Gsk3b	0	0	1	1	0	0	1	0	1	ext	0.0662924	0.0032	10.3	3.5	0.0342273	5.2	response to organic substance	intracellular signaling cascade
207	2932	AKT1	GSK3B	11651	56637	Akt1	Gsk3b	0	0	1	1	0	0	1	0	1	ext	0.0662924	0.0032	10.3	3.5	0.0342273	5.2	response to organic substance	negative regulation of developmental process
207	2932	AKT1	GSK3B	11651	56637	Akt1	Gsk3b	0	0	1	1	0	0	1	0	1	ext	0.0662924	0.0032	10.3	3.5	0.0342273	5.2	response to organic substance	cell surface receptor linked signal transduction
207	2932	AKT1	GSK3B	11651	56637	Akt1	Gsk3b	0	0	1	1	0	0	1	0	1	ext	0.0662924	0.0032	10.3	3.5	0.0342273	5.2	response to organic substance	anatomical structure formation
207	2932	AKT1	GSK3B	11651	56637	Akt1	Gsk3b	0	0	1	1	0	0	1	0	1	ext	0.0662924	0.0032	10.3	3.5	0.0342273	5.2	mitotic cell cycle	organ morphogenesis
207	2932	AKT1	GSK3B	11651	56637	Akt1	Gsk3b	0	0	1	1	0	0	1	0	1	ext	0.0662924	0.0032	10.3	3.5	0.0342273	5.2	mitotic cell cycle	protein amino acid phosphorylation
207	2932	AKT1	GSK3B	11651	56637	Akt1	Gsk3b	0	0	1	1	0	0	1	0	1	ext	0.0662924	0.0032	10.3	3.5	0.0342273	5.2	mitotic cell cycle	intracellular signaling cascade
207	2932	AKT1	GSK3B	11651	56637	Akt1	Gsk3b	0	0	1	1	0	0	1	0	1	ext	0.0662924	0.0032	10.3	3.5	0.0342273	5.2	mitotic cell cycle	negative regulation of developmental process
207	2932	AKT1	GSK3B	11651	56637	Akt1	Gsk3b	0	0	1	1	0	0	1	0	1	ext	0.0662924	0.0032	10.3	3.5	0.0342273	5.2	mitotic cell cycle	cell surface receptor linked signal transduction
207	2932	AKT1	GSK3B	11651	56637	Akt1	Gsk3b	0	0	1	1	0	0	1	0	1	ext	0.0662924	0.0032	10.3	3.5	0.0342273	5.2	mitotic cell cycle	anatomical structure formation
207	2932	AKT1	GSK3B	11651	56637	Akt1	Gsk3b	0	0	1	1	0	0	1	0	1	ext	0.0662924	0.0032	10.3	3.5	0.0342273	5.2	homeostatic process	organ morphogenesis
207	2932	AKT1	GSK3B	11651	56637	Akt1	Gsk3b	0	0	1	1	0	0	1	0	1	ext	0.0662924	0.0032	10.3	3.5	0.0342273	5.2	homeostatic process	protein amino acid phosphorylation
207	2932	AKT1	GSK3B	11651	56637	Akt1	Gsk3b	0	0	1	1	0	0	1	0	1	ext	0.0662924	0.0032	10.3	3.5	0.0342273	5.2	homeostatic process	intracellular signaling cascade
207	2932	AKT1	GSK3B	11651	56637	Akt1	Gsk3b	0	0	1	1	0	0	1	0	1	ext	0.0662924	0.0032	10.3	3.5	0.0342273	5.2	homeostatic process	negative regulation of developmental process
207	2932	AKT1	GSK3B	11651	56637	Akt1	Gsk3b	0	0	1	1	0	0	1	0	1	ext	0.0662924	0.0032	10.3	3.5	0.0342273	5.2	homeostatic process	cell surface receptor linked signal transduction
207	2932	AKT1	GSK3B	11651	56637	Akt1	Gsk3b	0	0	1	1	0	0	1	0	1	ext	0.0662924	0.0032	10.3	3.5	0.0342273	5.2	homeostatic process	anatomical structure formation
207	2932	AKT1	GSK3B	11651	56637	Akt1	Gsk3b	0	0	1	1	0	0	1	0	1	ext	0.0662924	0.0032	10.3	3.5	0.0342273	5.2	protein amino acid phosphorylation	organ morphogenesis
207	2932	AKT1	GSK3B	11651	56637	Akt1	Gsk3b	0	0	1	1	0	0	1	0	1	ext	0.0662924	0.0032	10.3	3.5	0.0342273	5.2	protein amino acid phosphorylation	protein amino acid phosphorylation
207	2932	AKT1	GSK3B	11651	56637	Akt1	Gsk3b	0	0	1	1	0	0	1	0	1	ext	0.0662924	0.0032	10.3	3.5	0.0342273	5.2	protein amino acid phosphorylation	intracellular signaling cascade
207	2932	AKT1	GSK3B	11651	56637	Akt1	Gsk3b	0	0	1	1	0	0	1	0	1	ext	0.0662924	0.0032	10.3	3.5	0.0342273	5.2	protein amino acid phosphorylation	negative regulation of developmental process
207	2932	AKT1	GSK3B	11651	56637	Akt1	Gsk3b	0	0	1	1	0	0	1	0	1	ext	0.0662924	0.0032	10.3	3.5	0.0342273	5.2	protein amino acid phosphorylation	cell surface receptor linked signal transduction
207	2932	AKT1	GSK3B	11651	56637	Akt1	Gsk3b	0	0	1	1	0	0	1	0	1	ext	0.0662924	0.0032	10.3	3.5	0.0342273	5.2	protein amino acid phosphorylation	anatomical structure formation
207	2932	AKT1	GSK3B	11651	56637	Akt1	Gsk3b	0	0	1	1	0	0	1	0	1	ext	0.0662924	0.0032	10.3	3.5	0.0342273	5.2	intracellular signaling cascade	organ morphogenesis
207	2932	AKT1	GSK3B	11651	56637	Akt1	Gsk3b	0	0	1	1	0	0	1	0	1	ext	0.0662924	0.0032	10.3	3.5	0.0342273	5.2	intracellular signaling cascade	protein amino acid phosphorylation
207	2932	AKT1	GSK3B	11651	56637	Akt1	Gsk3b	0	0	1	1	0	0	1	0	1	ext	0.0662924	0.0032	10.3	3.5	0.0342273	5.2	intracellular signaling cascade	intracellular signaling cascade
207	2932	AKT1	GSK3B	11651	56637	Akt1	Gsk3b	0	0	1	1	0	0	1	0	1	ext	0.0662924	0.0032	10.3	3.5	0.0342273	5.2	intracellular signaling cascade	negative regulation of developmental process
207	2932	AKT1	GSK3B	11651	56637	Akt1	Gsk3b	0	0	1	1	0	0	1	0	1	ext	0.0662924	0.0032	10.3	3.5	0.0342273	5.2	intracellular signaling cascade	cell surface receptor linked signal transduction
207	2932	AKT1	GSK3B	11651	56637	Akt1	Gsk3b	0	0	1	1	0	0	1	0	1	ext	0.0662924	0.0032	10.3	3.5	0.0342273	5.2	intracellular signaling cascade	anatomical structure formation
207	2932	AKT1	GSK3B	11651	56637	Akt1	Gsk3b	0	0	1	1	0	0	1	0	1	ext	0.0662924	0.0032	10.3	3.5	0.0342273	5.2	positive regulation of molecular function	organ morphogenesis
207	2932	AKT1	GSK3B	11651	56637	Akt1	Gsk3b	0	0	1	1	0	0	1	0	1	ext	0.0662924	0.0032	10.3	3.5	0.0342273	5.2	positive regulation of molecular function	protein amino acid phosphorylation
207	2932	AKT1	GSK3B	11651	56637	Akt1	Gsk3b	0	0	1	1	0	0	1	0	1	ext	0.0662924	0.0032	10.3	3.5	0.0342273	5.2	positive regulation of molecular function	intracellular signaling cascade
207	2932	AKT1	GSK3B	11651	56637	Akt1	Gsk3b	0	0	1	1	0	0	1	0	1	ext	0.0662924	0.0032	10.3	3.5	0.0342273	5.2	positive regulation of molecular function	negative regulation of developmental process
207	2932	AKT1	GSK3B	11651	56637	Akt1	Gsk3b	0	0	1	1	0	0	1	0	1	ext	0.0662924	0.0032	10.3	3.5	0.0342273	5.2	positive regulation of molecular function	cell surface receptor linked signal transduction
207	2932	AKT1	GSK3B	11651	56637	Akt1	Gsk3b	0	0	1	1	0	0	1	0	1	ext	0.0662924	0.0032	10.3	3.5	0.0342273	5.2	positive regulation of molecular function	anatomical structure formation
207	2932	AKT1	GSK3B	11651	56637	Akt1	Gsk3b	0	0	1	1	0	0	1	0	1	ext	0.0662924	0.0032	10.3	3.5	0.0342273	5.2	modification-dependent protein catabolic process	organ morphogenesis
207	2932	AKT1	GSK3B	11651	56637	Akt1	Gsk3b	0	0	1	1	0	0	1	0	1	ext	0.0662924	0.0032	10.3	3.5	0.0342273	5.2	modification-dependent protein catabolic process	protein amino acid phosphorylation
207	2932	AKT1	GSK3B	11651	56637	Akt1	Gsk3b	0	0	1	1	0	0	1	0	1	ext	0.0662924	0.0032	10.3	3.5	0.0342273	5.2	modification-dependent protein catabolic process	intracellular signaling cascade
207	2932	AKT1	GSK3B	11651	56637	Akt1	Gsk3b	0	0	1	1	0	0	1	0	1	ext	0.0662924	0.0032	10.3	3.5	0.0342273	5.2	modification-dependent protein catabolic process	negative regulation of developmental process
207	2932	AKT1	GSK3B	11651	56637	Akt1	Gsk3b	0	0	1	1	0	0	1	0	1	ext	0.0662924	0.0032	10.3	3.5	0.0342273	5.2	modification-dependent protein catabolic process	cell surface receptor linked signal transduction
207	2932	AKT1	GSK3B	11651	56637	Akt1	Gsk3b	0	0	1	1	0	0	1	0	1	ext	0.0662924	0.0032	10.3	3.5	0.0342273	5.2	modification-dependent protein catabolic process	anatomical structure formation
207	2932	AKT1	GSK3B	11651	56637	Akt1	Gsk3b	0	0	1	1	0	0	1	0	1	ext	0.0662924	0.0032	10.3	3.5	0.0342273	5.2	modification-dependent macromolecule catabolic process	organ morphogenesis
207	2932	AKT1	GSK3B	11651	56637	Akt1	Gsk3b	0	0	1	1	0	0	1	0	1	ext	0.0662924	0.0032	10.3	3.5	0.0342273	5.2	modification-dependent macromolecule catabolic process	protein amino acid phosphorylation
207	2932	AKT1	GSK3B	11651	56637	Akt1	Gsk3b	0	0	1	1	0	0	1	0	1	ext	0.0662924	0.0032	10.3	3.5	0.0342273	5.2	modification-dependent macromolecule catabolic process	intracellular signaling cascade
207	2932	AKT1	GSK3B	11651	56637	Akt1	Gsk3b	0	0	1	1	0	0	1	0	1	ext	0.0662924	0.0032	10.3	3.5	0.0342273	5.2	modification-dependent macromolecule catabolic process	negative regulation of developmental process
207	2932	AKT1	GSK3B	11651	56637	Akt1	Gsk3b	0	0	1	1	0	0	1	0	1	ext	0.0662924	0.0032	10.3	3.5	0.0342273	5.2	modification-dependent macromolecule catabolic process	cell surface receptor linked signal transduction
207	2932	AKT1	GSK3B	11651	56637	Akt1	Gsk3b	0	0	1	1	0	0	1	0	1	ext	0.0662924	0.0032	10.3	3.5	0.0342273	5.2	modification-dependent macromolecule catabolic process	anatomical structure formation
207	2932	AKT1	GSK3B	11651	56637	Akt1	Gsk3b	0	0	1	1	0	0	1	0	1	ext	0.0662924	0.0032	10.3	3.5	0.0342273	5.2	tissue development	organ morphogenesis
207	2932	AKT1	GSK3B	11651	56637	Akt1	Gsk3b	0	0	1	1	0	0	1	0	1	ext	0.0662924	0.0032	10.3	3.5	0.0342273	5.2	tissue development	protein amino acid phosphorylation
207	2932	AKT1	GSK3B	11651	56637	Akt1	Gsk3b	0	0	1	1	0	0	1	0	1	ext	0.0662924	0.0032	10.3	3.5	0.0342273	5.2	tissue development	intracellular signaling cascade
207	2932	AKT1	GSK3B	11651	56637	Akt1	Gsk3b	0	0	1	1	0	0	1	0	1	ext	0.0662924	0.0032	10.3	3.5	0.0342273	5.2	tissue development	negative regulation of developmental process
207	2932	AKT1	GSK3B	11651	56637	Akt1	Gsk3b	0	0	1	1	0	0	1	0	1	ext	0.0662924	0.0032	10.3	3.5	0.0342273	5.2	tissue development	cell surface receptor linked signal transduction
207	2932	AKT1	GSK3B	11651	56637	Akt1	Gsk3b	0	0	1	1	0	0	1	0	1	ext	0.0662924	0.0032	10.3	3.5	0.0342273	5.2	tissue development	anatomical structure formation
207	2932	AKT1	GSK3B	11651	56637	Akt1	Gsk3b	0	0	1	1	0	0	1	0	1	ext	0.0662924	0.0032	10.3	3.5	0.0342273	5.2	cellular protein catabolic process	organ morphogenesis
207	2932	AKT1	GSK3B	11651	56637	Akt1	Gsk3b	0	0	1	1	0	0	1	0	1	ext	0.0662924	0.0032	10.3	3.5	0.0342273	5.2	cellular protein catabolic process	protein amino acid phosphorylation
207	2932	AKT1	GSK3B	11651	56637	Akt1	Gsk3b	0	0	1	1	0	0	1	0	1	ext	0.0662924	0.0032	10.3	3.5	0.0342273	5.2	cellular protein catabolic process	intracellular signaling cascade
207	2932	AKT1	GSK3B	11651	56637	Akt1	Gsk3b	0	0	1	1	0	0	1	0	1	ext	0.0662924	0.0032	10.3	3.5	0.0342273	5.2	cellular protein catabolic process	negative regulation of developmental process
207	2932	AKT1	GSK3B	11651	56637	Akt1	Gsk3b	0	0	1	1	0	0	1	0	1	ext	0.0662924	0.0032	10.3	3.5	0.0342273	5.2	cellular protein catabolic process	cell surface receptor linked signal transduction
207	2932	AKT1	GSK3B	11651	56637	Akt1	Gsk3b	0	0	1	1	0	0	1	0	1	ext	0.0662924	0.0032	10.3	3.5	0.0342273	5.2	cellular protein catabolic process	anatomical structure formation
207	2932	AKT1	GSK3B	11651	56637	Akt1	Gsk3b	0	0	1	1	0	0	1	0	1	ext	0.0662924	0.0032	10.3	3.5	0.0342273	5.2	proteolysis involved in cellular protein catabolic process	organ morphogenesis
207	2932	AKT1	GSK3B	11651	56637	Akt1	Gsk3b	0	0	1	1	0	0	1	0	1	ext	0.0662924	0.0032	10.3	3.5	0.0342273	5.2	proteolysis involved in cellular protein catabolic process	protein amino acid phosphorylation
207	2932	AKT1	GSK3B	11651	56637	Akt1	Gsk3b	0	0	1	1	0	0	1	0	1	ext	0.0662924	0.0032	10.3	3.5	0.0342273	5.2	proteolysis involved in cellular protein catabolic process	intracellular signaling cascade
207	2932	AKT1	GSK3B	11651	56637	Akt1	Gsk3b	0	0	1	1	0	0	1	0	1	ext	0.0662924	0.0032	10.3	3.5	0.0342273	5.2	proteolysis involved in cellular protein catabolic process	negative regulation of developmental process
207	2932	AKT1	GSK3B	11651	56637	Akt1	Gsk3b	0	0	1	1	0	0	1	0	1	ext	0.0662924	0.0032	10.3	3.5	0.0342273	5.2	proteolysis involved in cellular protein catabolic process	cell surface receptor linked signal transduction
207	2932	AKT1	GSK3B	11651	56637	Akt1	Gsk3b	0	0	1	1	0	0	1	0	1	ext	0.0662924	0.0032	10.3	3.5	0.0342273	5.2	proteolysis involved in cellular protein catabolic process	anatomical structure formation
207	2932	AKT1	GSK3B	11651	56637	Akt1	Gsk3b	0	0	1	1	0	0	1	0	1	ext	0.0662924	0.0032	10.3	3.5	0.0342273	5.2	negative regulation of developmental process	organ morphogenesis
207	2932	AKT1	GSK3B	11651	56637	Akt1	Gsk3b	0	0	1	1	0	0	1	0	1	ext	0.0662924	0.0032	10.3	3.5	0.0342273	5.2	negative regulation of developmental process	protein amino acid phosphorylation
207	2932	AKT1	GSK3B	11651	56637	Akt1	Gsk3b	0	0	1	1	0	0	1	0	1	ext	0.0662924	0.0032	10.3	3.5	0.0342273	5.2	negative regulation of developmental process	intracellular signaling cascade
207	2932	AKT1	GSK3B	11651	56637	Akt1	Gsk3b	0	0	1	1	0	0	1	0	1	ext	0.0662924	0.0032	10.3	3.5	0.0342273	5.2	negative regulation of developmental process	negative regulation of developmental process
207	2932	AKT1	GSK3B	11651	56637	Akt1	Gsk3b	0	0	1	1	0	0	1	0	1	ext	0.0662924	0.0032	10.3	3.5	0.0342273	5.2	negative regulation of developmental process	cell surface receptor linked signal transduction
207	2932	AKT1	GSK3B	11651	56637	Akt1	Gsk3b	0	0	1	1	0	0	1	0	1	ext	0.0662924	0.0032	10.3	3.5	0.0342273	5.2	negative regulation of developmental process	anatomical structure formation
207	2932	AKT1	GSK3B	11651	56637	Akt1	Gsk3b	0	0	1	1	0	0	1	0	1	ext	0.0662924	0.0032	10.3	3.5	0.0342273	5.2	response to external stimulus	organ morphogenesis
207	2932	AKT1	GSK3B	11651	56637	Akt1	Gsk3b	0	0	1	1	0	0	1	0	1	ext	0.0662924	0.0032	10.3	3.5	0.0342273	5.2	response to external stimulus	protein amino acid phosphorylation
207	2932	AKT1	GSK3B	11651	56637	Akt1	Gsk3b	0	0	1	1	0	0	1	0	1	ext	0.0662924	0.0032	10.3	3.5	0.0342273	5.2	response to external stimulus	intracellular signaling cascade
207	2932	AKT1	GSK3B	11651	56637	Akt1	Gsk3b	0	0	1	1	0	0	1	0	1	ext	0.0662924	0.0032	10.3	3.5	0.0342273	5.2	response to external stimulus	negative regulation of developmental process
207	2932	AKT1	GSK3B	11651	56637	Akt1	Gsk3b	0	0	1	1	0	0	1	0	1	ext	0.0662924	0.0032	10.3	3.5	0.0342273	5.2	response to external stimulus	cell surface receptor linked signal transduction
207	2932	AKT1	GSK3B	11651	56637	Akt1	Gsk3b	0	0	1	1	0	0	1	0	1	ext	0.0662924	0.0032	10.3	3.5	0.0342273	5.2	response to external stimulus	anatomical structure formation
207	2932	AKT1	GSK3B	11651	56637	Akt1	Gsk3b	0	0	1	1	0	0	1	0	1	ext	0.0662924	0.0032	10.3	3.5	0.0342273	5.2	cell surface receptor linked signal transduction	organ morphogenesis
207	2932	AKT1	GSK3B	11651	56637	Akt1	Gsk3b	0	0	1	1	0	0	1	0	1	ext	0.0662924	0.0032	10.3	3.5	0.0342273	5.2	cell surface receptor linked signal transduction	protein amino acid phosphorylation
207	2932	AKT1	GSK3B	11651	56637	Akt1	Gsk3b	0	0	1	1	0	0	1	0	1	ext	0.0662924	0.0032	10.3	3.5	0.0342273	5.2	cell surface receptor linked signal transduction	intracellular signaling cascade
207	2932	AKT1	GSK3B	11651	56637	Akt1	Gsk3b	0	0	1	1	0	0	1	0	1	ext	0.0662924	0.0032	10.3	3.5	0.0342273	5.2	cell surface receptor linked signal transduction	negative regulation of developmental process
207	2932	AKT1	GSK3B	11651	56637	Akt1	Gsk3b	0	0	1	1	0	0	1	0	1	ext	0.0662924	0.0032	10.3	3.5	0.0342273	5.2	cell surface receptor linked signal transduction	cell surface receptor linked signal transduction
207	2932	AKT1	GSK3B	11651	56637	Akt1	Gsk3b	0	0	1	1	0	0	1	0	1	ext	0.0662924	0.0032	10.3	3.5	0.0342273	5.2	cell surface receptor linked signal transduction	anatomical structure formation
207	1111	AKT1	CHEK1	11651	12649	Akt1	Chek1	0	0	1	1	0	0	0	0	0	ext	0.0662924	0.0379367	10.3	12	0.000341615	11.2	response to organic substance	DNA repair
207	1111	AKT1	CHEK1	11651	12649	Akt1	Chek1	0	0	1	1	0	0	0	0	0	ext	0.0662924	0.0379367	10.3	12	0.000341615	11.2	response to organic substance	regulation of cell proliferation
207	1111	AKT1	CHEK1	11651	12649	Akt1	Chek1	0	0	1	1	0	0	0	0	0	ext	0.0662924	0.0379367	10.3	12	0.000341615	11.2	response to organic substance	mitotic cell cycle
207	1111	AKT1	CHEK1	11651	12649	Akt1	Chek1	0	0	1	1	0	0	0	0	0	ext	0.0662924	0.0379367	10.3	12	0.000341615	11.2	response to organic substance	protein amino acid phosphorylation
207	1111	AKT1	CHEK1	11651	12649	Akt1	Chek1	0	0	1	1	0	0	0	0	0	ext	0.0662924	0.0379367	10.3	12	0.000341615	11.2	response to organic substance	intracellular signaling cascade
207	1111	AKT1	CHEK1	11651	12649	Akt1	Chek1	0	0	1	1	0	0	0	0	0	ext	0.0662924	0.0379367	10.3	12	0.000341615	11.2	mitotic cell cycle	DNA repair
207	1111	AKT1	CHEK1	11651	12649	Akt1	Chek1	0	0	1	1	0	0	0	0	0	ext	0.0662924	0.0379367	10.3	12	0.000341615	11.2	mitotic cell cycle	regulation of cell proliferation
207	1111	AKT1	CHEK1	11651	12649	Akt1	Chek1	0	0	1	1	0	0	0	0	0	ext	0.0662924	0.0379367	10.3	12	0.000341615	11.2	mitotic cell cycle	mitotic cell cycle
207	1111	AKT1	CHEK1	11651	12649	Akt1	Chek1	0	0	1	1	0	0	0	0	0	ext	0.0662924	0.0379367	10.3	12	0.000341615	11.2	mitotic cell cycle	protein amino acid phosphorylation
207	1111	AKT1	CHEK1	11651	12649	Akt1	Chek1	0	0	1	1	0	0	0	0	0	ext	0.0662924	0.0379367	10.3	12	0.000341615	11.2	mitotic cell cycle	intracellular signaling cascade
207	1111	AKT1	CHEK1	11651	12649	Akt1	Chek1	0	0	1	1	0	0	0	0	0	ext	0.0662924	0.0379367	10.3	12	0.000341615	11.2	homeostatic process	DNA repair
207	1111	AKT1	CHEK1	11651	12649	Akt1	Chek1	0	0	1	1	0	0	0	0	0	ext	0.0662924	0.0379367	10.3	12	0.000341615	11.2	homeostatic process	regulation of cell proliferation
207	1111	AKT1	CHEK1	11651	12649	Akt1	Chek1	0	0	1	1	0	0	0	0	0	ext	0.0662924	0.0379367	10.3	12	0.000341615	11.2	homeostatic process	mitotic cell cycle
207	1111	AKT1	CHEK1	11651	12649	Akt1	Chek1	0	0	1	1	0	0	0	0	0	ext	0.0662924	0.0379367	10.3	12	0.000341615	11.2	homeostatic process	protein amino acid phosphorylation
207	1111	AKT1	CHEK1	11651	12649	Akt1	Chek1	0	0	1	1	0	0	0	0	0	ext	0.0662924	0.0379367	10.3	12	0.000341615	11.2	homeostatic process	intracellular signaling cascade
207	1111	AKT1	CHEK1	11651	12649	Akt1	Chek1	0	0	1	1	0	0	0	0	0	ext	0.0662924	0.0379367	10.3	12	0.000341615	11.2	protein amino acid phosphorylation	DNA repair
207	1111	AKT1	CHEK1	11651	12649	Akt1	Chek1	0	0	1	1	0	0	0	0	0	ext	0.0662924	0.0379367	10.3	12	0.000341615	11.2	protein amino acid phosphorylation	regulation of cell proliferation
207	1111	AKT1	CHEK1	11651	12649	Akt1	Chek1	0	0	1	1	0	0	0	0	0	ext	0.0662924	0.0379367	10.3	12	0.000341615	11.2	protein amino acid phosphorylation	mitotic cell cycle
207	1111	AKT1	CHEK1	11651	12649	Akt1	Chek1	0	0	1	1	0	0	0	0	0	ext	0.0662924	0.0379367	10.3	12	0.000341615	11.2	protein amino acid phosphorylation	protein amino acid phosphorylation
207	1111	AKT1	CHEK1	11651	12649	Akt1	Chek1	0	0	1	1	0	0	0	0	0	ext	0.0662924	0.0379367	10.3	12	0.000341615	11.2	protein amino acid phosphorylation	intracellular signaling cascade
207	1111	AKT1	CHEK1	11651	12649	Akt1	Chek1	0	0	1	1	0	0	0	0	0	ext	0.0662924	0.0379367	10.3	12	0.000341615	11.2	intracellular signaling cascade	DNA repair
207	1111	AKT1	CHEK1	11651	12649	Akt1	Chek1	0	0	1	1	0	0	0	0	0	ext	0.0662924	0.0379367	10.3	12	0.000341615	11.2	intracellular signaling cascade	regulation of cell proliferation
207	1111	AKT1	CHEK1	11651	12649	Akt1	Chek1	0	0	1	1	0	0	0	0	0	ext	0.0662924	0.0379367	10.3	12	0.000341615	11.2	intracellular signaling cascade	mitotic cell cycle
207	1111	AKT1	CHEK1	11651	12649	Akt1	Chek1	0	0	1	1	0	0	0	0	0	ext	0.0662924	0.0379367	10.3	12	0.000341615	11.2	intracellular signaling cascade	protein amino acid phosphorylation
207	1111	AKT1	CHEK1	11651	12649	Akt1	Chek1	0	0	1	1	0	0	0	0	0	ext	0.0662924	0.0379367	10.3	12	0.000341615	11.2	intracellular signaling cascade	intracellular signaling cascade
207	1111	AKT1	CHEK1	11651	12649	Akt1	Chek1	0	0	1	1	0	0	0	0	0	ext	0.0662924	0.0379367	10.3	12	0.000341615	11.2	positive regulation of molecular function	DNA repair
207	1111	AKT1	CHEK1	11651	12649	Akt1	Chek1	0	0	1	1	0	0	0	0	0	ext	0.0662924	0.0379367	10.3	12	0.000341615	11.2	positive regulation of molecular function	regulation of cell proliferation
207	1111	AKT1	CHEK1	11651	12649	Akt1	Chek1	0	0	1	1	0	0	0	0	0	ext	0.0662924	0.0379367	10.3	12	0.000341615	11.2	positive regulation of molecular function	mitotic cell cycle
207	1111	AKT1	CHEK1	11651	12649	Akt1	Chek1	0	0	1	1	0	0	0	0	0	ext	0.0662924	0.0379367	10.3	12	0.000341615	11.2	positive regulation of molecular function	protein amino acid phosphorylation
207	1111	AKT1	CHEK1	11651	12649	Akt1	Chek1	0	0	1	1	0	0	0	0	0	ext	0.0662924	0.0379367	10.3	12	0.000341615	11.2	positive regulation of molecular function	intracellular signaling cascade
207	1111	AKT1	CHEK1	11651	12649	Akt1	Chek1	0	0	1	1	0	0	0	0	0	ext	0.0662924	0.0379367	10.3	12	0.000341615	11.2	modification-dependent protein catabolic process	DNA repair
207	1111	AKT1	CHEK1	11651	12649	Akt1	Chek1	0	0	1	1	0	0	0	0	0	ext	0.0662924	0.0379367	10.3	12	0.000341615	11.2	modification-dependent protein catabolic process	regulation of cell proliferation
207	1111	AKT1	CHEK1	11651	12649	Akt1	Chek1	0	0	1	1	0	0	0	0	0	ext	0.0662924	0.0379367	10.3	12	0.000341615	11.2	modification-dependent protein catabolic process	mitotic cell cycle
207	1111	AKT1	CHEK1	11651	12649	Akt1	Chek1	0	0	1	1	0	0	0	0	0	ext	0.0662924	0.0379367	10.3	12	0.000341615	11.2	modification-dependent protein catabolic process	protein amino acid phosphorylation
207	1111	AKT1	CHEK1	11651	12649	Akt1	Chek1	0	0	1	1	0	0	0	0	0	ext	0.0662924	0.0379367	10.3	12	0.000341615	11.2	modification-dependent protein catabolic process	intracellular signaling cascade
207	1111	AKT1	CHEK1	11651	12649	Akt1	Chek1	0	0	1	1	0	0	0	0	0	ext	0.0662924	0.0379367	10.3	12	0.000341615	11.2	modification-dependent macromolecule catabolic process	DNA repair
207	1111	AKT1	CHEK1	11651	12649	Akt1	Chek1	0	0	1	1	0	0	0	0	0	ext	0.0662924	0.0379367	10.3	12	0.000341615	11.2	modification-dependent macromolecule catabolic process	regulation of cell proliferation
207	1111	AKT1	CHEK1	11651	12649	Akt1	Chek1	0	0	1	1	0	0	0	0	0	ext	0.0662924	0.0379367	10.3	12	0.000341615	11.2	modification-dependent macromolecule catabolic process	mitotic cell cycle
207	1111	AKT1	CHEK1	11651	12649	Akt1	Chek1	0	0	1	1	0	0	0	0	0	ext	0.0662924	0.0379367	10.3	12	0.000341615	11.2	modification-dependent macromolecule catabolic process	protein amino acid phosphorylation
207	1111	AKT1	CHEK1	11651	12649	Akt1	Chek1	0	0	1	1	0	0	0	0	0	ext	0.0662924	0.0379367	10.3	12	0.000341615	11.2	modification-dependent macromolecule catabolic process	intracellular signaling cascade
207	1111	AKT1	CHEK1	11651	12649	Akt1	Chek1	0	0	1	1	0	0	0	0	0	ext	0.0662924	0.0379367	10.3	12	0.000341615	11.2	tissue development	DNA repair
207	1111	AKT1	CHEK1	11651	12649	Akt1	Chek1	0	0	1	1	0	0	0	0	0	ext	0.0662924	0.0379367	10.3	12	0.000341615	11.2	tissue development	regulation of cell proliferation
207	1111	AKT1	CHEK1	11651	12649	Akt1	Chek1	0	0	1	1	0	0	0	0	0	ext	0.0662924	0.0379367	10.3	12	0.000341615	11.2	tissue development	mitotic cell cycle
207	1111	AKT1	CHEK1	11651	12649	Akt1	Chek1	0	0	1	1	0	0	0	0	0	ext	0.0662924	0.0379367	10.3	12	0.000341615	11.2	tissue development	protein amino acid phosphorylation
207	1111	AKT1	CHEK1	11651	12649	Akt1	Chek1	0	0	1	1	0	0	0	0	0	ext	0.0662924	0.0379367	10.3	12	0.000341615	11.2	tissue development	intracellular signaling cascade
207	1111	AKT1	CHEK1	11651	12649	Akt1	Chek1	0	0	1	1	0	0	0	0	0	ext	0.0662924	0.0379367	10.3	12	0.000341615	11.2	cellular protein catabolic process	DNA repair
207	1111	AKT1	CHEK1	11651	12649	Akt1	Chek1	0	0	1	1	0	0	0	0	0	ext	0.0662924	0.0379367	10.3	12	0.000341615	11.2	cellular protein catabolic process	regulation of cell proliferation
207	1111	AKT1	CHEK1	11651	12649	Akt1	Chek1	0	0	1	1	0	0	0	0	0	ext	0.0662924	0.0379367	10.3	12	0.000341615	11.2	cellular protein catabolic process	mitotic cell cycle
207	1111	AKT1	CHEK1	11651	12649	Akt1	Chek1	0	0	1	1	0	0	0	0	0	ext	0.0662924	0.0379367	10.3	12	0.000341615	11.2	cellular protein catabolic process	protein amino acid phosphorylation
207	1111	AKT1	CHEK1	11651	12649	Akt1	Chek1	0	0	1	1	0	0	0	0	0	ext	0.0662924	0.0379367	10.3	12	0.000341615	11.2	cellular protein catabolic process	intracellular signaling cascade
207	1111	AKT1	CHEK1	11651	12649	Akt1	Chek1	0	0	1	1	0	0	0	0	0	ext	0.0662924	0.0379367	10.3	12	0.000341615	11.2	proteolysis involved in cellular protein catabolic process	DNA repair
207	1111	AKT1	CHEK1	11651	12649	Akt1	Chek1	0	0	1	1	0	0	0	0	0	ext	0.0662924	0.0379367	10.3	12	0.000341615	11.2	proteolysis involved in cellular protein catabolic process	regulation of cell proliferation
207	1111	AKT1	CHEK1	11651	12649	Akt1	Chek1	0	0	1	1	0	0	0	0	0	ext	0.0662924	0.0379367	10.3	12	0.000341615	11.2	proteolysis involved in cellular protein catabolic process	mitotic cell cycle
207	1111	AKT1	CHEK1	11651	12649	Akt1	Chek1	0	0	1	1	0	0	0	0	0	ext	0.0662924	0.0379367	10.3	12	0.000341615	11.2	proteolysis involved in cellular protein catabolic process	protein amino acid phosphorylation
207	1111	AKT1	CHEK1	11651	12649	Akt1	Chek1	0	0	1	1	0	0	0	0	0	ext	0.0662924	0.0379367	10.3	12	0.000341615	11.2	proteolysis involved in cellular protein catabolic process	intracellular signaling cascade
207	1111	AKT1	CHEK1	11651	12649	Akt1	Chek1	0	0	1	1	0	0	0	0	0	ext	0.0662924	0.0379367	10.3	12	0.000341615	11.2	negative regulation of developmental process	DNA repair
207	1111	AKT1	CHEK1	11651	12649	Akt1	Chek1	0	0	1	1	0	0	0	0	0	ext	0.0662924	0.0379367	10.3	12	0.000341615	11.2	negative regulation of developmental process	regulation of cell proliferation
207	1111	AKT1	CHEK1	11651	12649	Akt1	Chek1	0	0	1	1	0	0	0	0	0	ext	0.0662924	0.0379367	10.3	12	0.000341615	11.2	negative regulation of developmental process	mitotic cell cycle
207	1111	AKT1	CHEK1	11651	12649	Akt1	Chek1	0	0	1	1	0	0	0	0	0	ext	0.0662924	0.0379367	10.3	12	0.000341615	11.2	negative regulation of developmental process	protein amino acid phosphorylation
207	1111	AKT1	CHEK1	11651	12649	Akt1	Chek1	0	0	1	1	0	0	0	0	0	ext	0.0662924	0.0379367	10.3	12	0.000341615	11.2	negative regulation of developmental process	intracellular signaling cascade
207	1111	AKT1	CHEK1	11651	12649	Akt1	Chek1	0	0	1	1	0	0	0	0	0	ext	0.0662924	0.0379367	10.3	12	0.000341615	11.2	response to external stimulus	DNA repair
207	1111	AKT1	CHEK1	11651	12649	Akt1	Chek1	0	0	1	1	0	0	0	0	0	ext	0.0662924	0.0379367	10.3	12	0.000341615	11.2	response to external stimulus	regulation of cell proliferation
207	1111	AKT1	CHEK1	11651	12649	Akt1	Chek1	0	0	1	1	0	0	0	0	0	ext	0.0662924	0.0379367	10.3	12	0.000341615	11.2	response to external stimulus	mitotic cell cycle
207	1111	AKT1	CHEK1	11651	12649	Akt1	Chek1	0	0	1	1	0	0	0	0	0	ext	0.0662924	0.0379367	10.3	12	0.000341615	11.2	response to external stimulus	protein amino acid phosphorylation
207	1111	AKT1	CHEK1	11651	12649	Akt1	Chek1	0	0	1	1	0	0	0	0	0	ext	0.0662924	0.0379367	10.3	12	0.000341615	11.2	response to external stimulus	intracellular signaling cascade
207	1111	AKT1	CHEK1	11651	12649	Akt1	Chek1	0	0	1	1	0	0	0	0	0	ext	0.0662924	0.0379367	10.3	12	0.000341615	11.2	cell surface receptor linked signal transduction	DNA repair
207	1111	AKT1	CHEK1	11651	12649	Akt1	Chek1	0	0	1	1	0	0	0	0	0	ext	0.0662924	0.0379367	10.3	12	0.000341615	11.2	cell surface receptor linked signal transduction	regulation of cell proliferation
207	1111	AKT1	CHEK1	11651	12649	Akt1	Chek1	0	0	1	1	0	0	0	0	0	ext	0.0662924	0.0379367	10.3	12	0.000341615	11.2	cell surface receptor linked signal transduction	mitotic cell cycle
207	1111	AKT1	CHEK1	11651	12649	Akt1	Chek1	0	0	1	1	0	0	0	0	0	ext	0.0662924	0.0379367	10.3	12	0.000341615	11.2	cell surface receptor linked signal transduction	protein amino acid phosphorylation
207	1111	AKT1	CHEK1	11651	12649	Akt1	Chek1	0	0	1	1	0	0	0	0	0	ext	0.0662924	0.0379367	10.3	12	0.000341615	11.2	cell surface receptor linked signal transduction	intracellular signaling cascade
207	207	AKT1	AKT1	11651	11651	Akt1	Akt1	0	0	1	1	0	0	0	0	0	ext	0.0662924	0.0662924	10.3	10.3	0.0257163	10.3	response to organic substance	response to organic substance
207	207	AKT1	AKT1	11651	11651	Akt1	Akt1	0	0	1	1	0	0	0	0	0	ext	0.0662924	0.0662924	10.3	10.3	0.0257163	10.3	response to organic substance	mitotic cell cycle
207	207	AKT1	AKT1	11651	11651	Akt1	Akt1	0	0	1	1	0	0	0	0	0	ext	0.0662924	0.0662924	10.3	10.3	0.0257163	10.3	response to organic substance	homeostatic process
207	207	AKT1	AKT1	11651	11651	Akt1	Akt1	0	0	1	1	0	0	0	0	0	ext	0.0662924	0.0662924	10.3	10.3	0.0257163	10.3	response to organic substance	protein amino acid phosphorylation
207	207	AKT1	AKT1	11651	11651	Akt1	Akt1	0	0	1	1	0	0	0	0	0	ext	0.0662924	0.0662924	10.3	10.3	0.0257163	10.3	response to organic substance	intracellular signaling cascade
207	207	AKT1	AKT1	11651	11651	Akt1	Akt1	0	0	1	1	0	0	0	0	0	ext	0.0662924	0.0662924	10.3	10.3	0.0257163	10.3	response to organic substance	positive regulation of molecular function
207	207	AKT1	AKT1	11651	11651	Akt1	Akt1	0	0	1	1	0	0	0	0	0	ext	0.0662924	0.0662924	10.3	10.3	0.0257163	10.3	response to organic substance	modification-dependent protein catabolic process
207	207	AKT1	AKT1	11651	11651	Akt1	Akt1	0	0	1	1	0	0	0	0	0	ext	0.0662924	0.0662924	10.3	10.3	0.0257163	10.3	response to organic substance	modification-dependent macromolecule catabolic process
207	207	AKT1	AKT1	11651	11651	Akt1	Akt1	0	0	1	1	0	0	0	0	0	ext	0.0662924	0.0662924	10.3	10.3	0.0257163	10.3	response to organic substance	tissue development
207	207	AKT1	AKT1	11651	11651	Akt1	Akt1	0	0	1	1	0	0	0	0	0	ext	0.0662924	0.0662924	10.3	10.3	0.0257163	10.3	response to organic substance	cellular protein catabolic process
207	207	AKT1	AKT1	11651	11651	Akt1	Akt1	0	0	1	1	0	0	0	0	0	ext	0.0662924	0.0662924	10.3	10.3	0.0257163	10.3	response to organic substance	proteolysis involved in cellular protein catabolic process
207	207	AKT1	AKT1	11651	11651	Akt1	Akt1	0	0	1	1	0	0	0	0	0	ext	0.0662924	0.0662924	10.3	10.3	0.0257163	10.3	response to organic substance	negative regulation of developmental process
207	207	AKT1	AKT1	11651	11651	Akt1	Akt1	0	0	1	1	0	0	0	0	0	ext	0.0662924	0.0662924	10.3	10.3	0.0257163	10.3	response to organic substance	response to external stimulus
207	207	AKT1	AKT1	11651	11651	Akt1	Akt1	0	0	1	1	0	0	0	0	0	ext	0.0662924	0.0662924	10.3	10.3	0.0257163	10.3	response to organic substance	cell surface receptor linked signal transduction
207	207	AKT1	AKT1	11651	11651	Akt1	Akt1	0	0	1	1	0	0	0	0	0	ext	0.0662924	0.0662924	10.3	10.3	0.0257163	10.3	mitotic cell cycle	response to organic substance
207	207	AKT1	AKT1	11651	11651	Akt1	Akt1	0	0	1	1	0	0	0	0	0	ext	0.0662924	0.0662924	10.3	10.3	0.0257163	10.3	mitotic cell cycle	mitotic cell cycle
207	207	AKT1	AKT1	11651	11651	Akt1	Akt1	0	0	1	1	0	0	0	0	0	ext	0.0662924	0.0662924	10.3	10.3	0.0257163	10.3	mitotic cell cycle	homeostatic process
207	207	AKT1	AKT1	11651	11651	Akt1	Akt1	0	0	1	1	0	0	0	0	0	ext	0.0662924	0.0662924	10.3	10.3	0.0257163	10.3	mitotic cell cycle	protein amino acid phosphorylation
207	207	AKT1	AKT1	11651	11651	Akt1	Akt1	0	0	1	1	0	0	0	0	0	ext	0.0662924	0.0662924	10.3	10.3	0.0257163	10.3	mitotic cell cycle	intracellular signaling cascade
207	207	AKT1	AKT1	11651	11651	Akt1	Akt1	0	0	1	1	0	0	0	0	0	ext	0.0662924	0.0662924	10.3	10.3	0.0257163	10.3	mitotic cell cycle	positive regulation of molecular function
207	207	AKT1	AKT1	11651	11651	Akt1	Akt1	0	0	1	1	0	0	0	0	0	ext	0.0662924	0.0662924	10.3	10.3	0.0257163	10.3	mitotic cell cycle	modification-dependent protein catabolic process
207	207	AKT1	AKT1	11651	11651	Akt1	Akt1	0	0	1	1	0	0	0	0	0	ext	0.0662924	0.0662924	10.3	10.3	0.0257163	10.3	mitotic cell cycle	modification-dependent macromolecule catabolic process
207	207	AKT1	AKT1	11651	11651	Akt1	Akt1	0	0	1	1	0	0	0	0	0	ext	0.0662924	0.0662924	10.3	10.3	0.0257163	10.3	mitotic cell cycle	tissue development
207	207	AKT1	AKT1	11651	11651	Akt1	Akt1	0	0	1	1	0	0	0	0	0	ext	0.0662924	0.0662924	10.3	10.3	0.0257163	10.3	mitotic cell cycle	cellular protein catabolic process
207	207	AKT1	AKT1	11651	11651	Akt1	Akt1	0	0	1	1	0	0	0	0	0	ext	0.0662924	0.0662924	10.3	10.3	0.0257163	10.3	mitotic cell cycle	proteolysis involved in cellular protein catabolic process
207	207	AKT1	AKT1	11651	11651	Akt1	Akt1	0	0	1	1	0	0	0	0	0	ext	0.0662924	0.0662924	10.3	10.3	0.0257163	10.3	mitotic cell cycle	negative regulation of developmental process
207	207	AKT1	AKT1	11651	11651	Akt1	Akt1	0	0	1	1	0	0	0	0	0	ext	0.0662924	0.0662924	10.3	10.3	0.0257163	10.3	mitotic cell cycle	response to external stimulus
207	207	AKT1	AKT1	11651	11651	Akt1	Akt1	0	0	1	1	0	0	0	0	0	ext	0.0662924	0.0662924	10.3	10.3	0.0257163	10.3	mitotic cell cycle	cell surface receptor linked signal transduction
207	207	AKT1	AKT1	11651	11651	Akt1	Akt1	0	0	1	1	0	0	0	0	0	ext	0.0662924	0.0662924	10.3	10.3	0.0257163	10.3	homeostatic process	response to organic substance
207	207	AKT1	AKT1	11651	11651	Akt1	Akt1	0	0	1	1	0	0	0	0	0	ext	0.0662924	0.0662924	10.3	10.3	0.0257163	10.3	homeostatic process	mitotic cell cycle
207	207	AKT1	AKT1	11651	11651	Akt1	Akt1	0	0	1	1	0	0	0	0	0	ext	0.0662924	0.0662924	10.3	10.3	0.0257163	10.3	homeostatic process	homeostatic process
207	207	AKT1	AKT1	11651	11651	Akt1	Akt1	0	0	1	1	0	0	0	0	0	ext	0.0662924	0.0662924	10.3	10.3	0.0257163	10.3	homeostatic process	protein amino acid phosphorylation
207	207	AKT1	AKT1	11651	11651	Akt1	Akt1	0	0	1	1	0	0	0	0	0	ext	0.0662924	0.0662924	10.3	10.3	0.0257163	10.3	homeostatic process	intracellular signaling cascade
207	207	AKT1	AKT1	11651	11651	Akt1	Akt1	0	0	1	1	0	0	0	0	0	ext	0.0662924	0.0662924	10.3	10.3	0.0257163	10.3	homeostatic process	positive regulation of molecular function
207	207	AKT1	AKT1	11651	11651	Akt1	Akt1	0	0	1	1	0	0	0	0	0	ext	0.0662924	0.0662924	10.3	10.3	0.0257163	10.3	homeostatic process	modification-dependent protein catabolic process
207	207	AKT1	AKT1	11651	11651	Akt1	Akt1	0	0	1	1	0	0	0	0	0	ext	0.0662924	0.0662924	10.3	10.3	0.0257163	10.3	homeostatic process	modification-dependent macromolecule catabolic process
207	207	AKT1	AKT1	11651	11651	Akt1	Akt1	0	0	1	1	0	0	0	0	0	ext	0.0662924	0.0662924	10.3	10.3	0.0257163	10.3	homeostatic process	tissue development
207	207	AKT1	AKT1	11651	11651	Akt1	Akt1	0	0	1	1	0	0	0	0	0	ext	0.0662924	0.0662924	10.3	10.3	0.0257163	10.3	homeostatic process	cellular protein catabolic process
207	207	AKT1	AKT1	11651	11651	Akt1	Akt1	0	0	1	1	0	0	0	0	0	ext	0.0662924	0.0662924	10.3	10.3	0.0257163	10.3	homeostatic process	proteolysis involved in cellular protein catabolic process
207	207	AKT1	AKT1	11651	11651	Akt1	Akt1	0	0	1	1	0	0	0	0	0	ext	0.0662924	0.0662924	10.3	10.3	0.0257163	10.3	homeostatic process	negative regulation of developmental process
207	207	AKT1	AKT1	11651	11651	Akt1	Akt1	0	0	1	1	0	0	0	0	0	ext	0.0662924	0.0662924	10.3	10.3	0.0257163	10.3	homeostatic process	response to external stimulus
207	207	AKT1	AKT1	11651	11651	Akt1	Akt1	0	0	1	1	0	0	0	0	0	ext	0.0662924	0.0662924	10.3	10.3	0.0257163	10.3	homeostatic process	cell surface receptor linked signal transduction
207	207	AKT1	AKT1	11651	11651	Akt1	Akt1	0	0	1	1	0	0	0	0	0	ext	0.0662924	0.0662924	10.3	10.3	0.0257163	10.3	protein amino acid phosphorylation	response to organic substance
207	207	AKT1	AKT1	11651	11651	Akt1	Akt1	0	0	1	1	0	0	0	0	0	ext	0.0662924	0.0662924	10.3	10.3	0.0257163	10.3	protein amino acid phosphorylation	mitotic cell cycle
207	207	AKT1	AKT1	11651	11651	Akt1	Akt1	0	0	1	1	0	0	0	0	0	ext	0.0662924	0.0662924	10.3	10.3	0.0257163	10.3	protein amino acid phosphorylation	homeostatic process
207	207	AKT1	AKT1	11651	11651	Akt1	Akt1	0	0	1	1	0	0	0	0	0	ext	0.0662924	0.0662924	10.3	10.3	0.0257163	10.3	protein amino acid phosphorylation	protein amino acid phosphorylation
207	207	AKT1	AKT1	11651	11651	Akt1	Akt1	0	0	1	1	0	0	0	0	0	ext	0.0662924	0.0662924	10.3	10.3	0.0257163	10.3	protein amino acid phosphorylation	intracellular signaling cascade
207	207	AKT1	AKT1	11651	11651	Akt1	Akt1	0	0	1	1	0	0	0	0	0	ext	0.0662924	0.0662924	10.3	10.3	0.0257163	10.3	protein amino acid phosphorylation	positive regulation of molecular function
207	207	AKT1	AKT1	11651	11651	Akt1	Akt1	0	0	1	1	0	0	0	0	0	ext	0.0662924	0.0662924	10.3	10.3	0.0257163	10.3	protein amino acid phosphorylation	modification-dependent protein catabolic process
207	207	AKT1	AKT1	11651	11651	Akt1	Akt1	0	0	1	1	0	0	0	0	0	ext	0.0662924	0.0662924	10.3	10.3	0.0257163	10.3	protein amino acid phosphorylation	modification-dependent macromolecule catabolic process
207	207	AKT1	AKT1	11651	11651	Akt1	Akt1	0	0	1	1	0	0	0	0	0	ext	0.0662924	0.0662924	10.3	10.3	0.0257163	10.3	protein amino acid phosphorylation	tissue development
207	207	AKT1	AKT1	11651	11651	Akt1	Akt1	0	0	1	1	0	0	0	0	0	ext	0.0662924	0.0662924	10.3	10.3	0.0257163	10.3	protein amino acid phosphorylation	cellular protein catabolic process
207	207	AKT1	AKT1	11651	11651	Akt1	Akt1	0	0	1	1	0	0	0	0	0	ext	0.0662924	0.0662924	10.3	10.3	0.0257163	10.3	protein amino acid phosphorylation	proteolysis involved in cellular protein catabolic process
207	207	AKT1	AKT1	11651	11651	Akt1	Akt1	0	0	1	1	0	0	0	0	0	ext	0.0662924	0.0662924	10.3	10.3	0.0257163	10.3	protein amino acid phosphorylation	negative regulation of developmental process
207	207	AKT1	AKT1	11651	11651	Akt1	Akt1	0	0	1	1	0	0	0	0	0	ext	0.0662924	0.0662924	10.3	10.3	0.0257163	10.3	protein amino acid phosphorylation	response to external stimulus
207	207	AKT1	AKT1	11651	11651	Akt1	Akt1	0	0	1	1	0	0	0	0	0	ext	0.0662924	0.0662924	10.3	10.3	0.0257163	10.3	protein amino acid phosphorylation	cell surface receptor linked signal transduction
207	207	AKT1	AKT1	11651	11651	Akt1	Akt1	0	0	1	1	0	0	0	0	0	ext	0.0662924	0.0662924	10.3	10.3	0.0257163	10.3	intracellular signaling cascade	response to organic substance
207	207	AKT1	AKT1	11651	11651	Akt1	Akt1	0	0	1	1	0	0	0	0	0	ext	0.0662924	0.0662924	10.3	10.3	0.0257163	10.3	intracellular signaling cascade	mitotic cell cycle
207	207	AKT1	AKT1	11651	11651	Akt1	Akt1	0	0	1	1	0	0	0	0	0	ext	0.0662924	0.0662924	10.3	10.3	0.0257163	10.3	intracellular signaling cascade	homeostatic process
207	207	AKT1	AKT1	11651	11651	Akt1	Akt1	0	0	1	1	0	0	0	0	0	ext	0.0662924	0.0662924	10.3	10.3	0.0257163	10.3	intracellular signaling cascade	protein amino acid phosphorylation
207	207	AKT1	AKT1	11651	11651	Akt1	Akt1	0	0	1	1	0	0	0	0	0	ext	0.0662924	0.0662924	10.3	10.3	0.0257163	10.3	intracellular signaling cascade	intracellular signaling cascade
207	207	AKT1	AKT1	11651	11651	Akt1	Akt1	0	0	1	1	0	0	0	0	0	ext	0.0662924	0.0662924	10.3	10.3	0.0257163	10.3	intracellular signaling cascade	positive regulation of molecular function
207	207	AKT1	AKT1	11651	11651	Akt1	Akt1	0	0	1	1	0	0	0	0	0	ext	0.0662924	0.0662924	10.3	10.3	0.0257163	10.3	intracellular signaling cascade	modification-dependent protein catabolic process
207	207	AKT1	AKT1	11651	11651	Akt1	Akt1	0	0	1	1	0	0	0	0	0	ext	0.0662924	0.0662924	10.3	10.3	0.0257163	10.3	intracellular signaling cascade	modification-dependent macromolecule catabolic process
207	207	AKT1	AKT1	11651	11651	Akt1	Akt1	0	0	1	1	0	0	0	0	0	ext	0.0662924	0.0662924	10.3	10.3	0.0257163	10.3	intracellular signaling cascade	tissue development
207	207	AKT1	AKT1	11651	11651	Akt1	Akt1	0	0	1	1	0	0	0	0	0	ext	0.0662924	0.0662924	10.3	10.3	0.0257163	10.3	intracellular signaling cascade	cellular protein catabolic process
207	207	AKT1	AKT1	11651	11651	Akt1	Akt1	0	0	1	1	0	0	0	0	0	ext	0.0662924	0.0662924	10.3	10.3	0.0257163	10.3	intracellular signaling cascade	proteolysis involved in cellular protein catabolic process
207	207	AKT1	AKT1	11651	11651	Akt1	Akt1	0	0	1	1	0	0	0	0	0	ext	0.0662924	0.0662924	10.3	10.3	0.0257163	10.3	intracellular signaling cascade	negative regulation of developmental process
207	207	AKT1	AKT1	11651	11651	Akt1	Akt1	0	0	1	1	0	0	0	0	0	ext	0.0662924	0.0662924	10.3	10.3	0.0257163	10.3	intracellular signaling cascade	response to external stimulus
207	207	AKT1	AKT1	11651	11651	Akt1	Akt1	0	0	1	1	0	0	0	0	0	ext	0.0662924	0.0662924	10.3	10.3	0.0257163	10.3	intracellular signaling cascade	cell surface receptor linked signal transduction
207	207	AKT1	AKT1	11651	11651	Akt1	Akt1	0	0	1	1	0	0	0	0	0	ext	0.0662924	0.0662924	10.3	10.3	0.0257163	10.3	positive regulation of molecular function	response to organic substance
207	207	AKT1	AKT1	11651	11651	Akt1	Akt1	0	0	1	1	0	0	0	0	0	ext	0.0662924	0.0662924	10.3	10.3	0.0257163	10.3	positive regulation of molecular function	mitotic cell cycle
207	207	AKT1	AKT1	11651	11651	Akt1	Akt1	0	0	1	1	0	0	0	0	0	ext	0.0662924	0.0662924	10.3	10.3	0.0257163	10.3	positive regulation of molecular function	homeostatic process
207	207	AKT1	AKT1	11651	11651	Akt1	Akt1	0	0	1	1	0	0	0	0	0	ext	0.0662924	0.0662924	10.3	10.3	0.0257163	10.3	positive regulation of molecular function	protein amino acid phosphorylation
207	207	AKT1	AKT1	11651	11651	Akt1	Akt1	0	0	1	1	0	0	0	0	0	ext	0.0662924	0.0662924	10.3	10.3	0.0257163	10.3	positive regulation of molecular function	intracellular signaling cascade
207	207	AKT1	AKT1	11651	11651	Akt1	Akt1	0	0	1	1	0	0	0	0	0	ext	0.0662924	0.0662924	10.3	10.3	0.0257163	10.3	positive regulation of molecular function	positive regulation of molecular function
207	207	AKT1	AKT1	11651	11651	Akt1	Akt1	0	0	1	1	0	0	0	0	0	ext	0.0662924	0.0662924	10.3	10.3	0.0257163	10.3	positive regulation of molecular function	modification-dependent protein catabolic process
207	207	AKT1	AKT1	11651	11651	Akt1	Akt1	0	0	1	1	0	0	0	0	0	ext	0.0662924	0.0662924	10.3	10.3	0.0257163	10.3	positive regulation of molecular function	modification-dependent macromolecule catabolic process
207	207	AKT1	AKT1	11651	11651	Akt1	Akt1	0	0	1	1	0	0	0	0	0	ext	0.0662924	0.0662924	10.3	10.3	0.0257163	10.3	positive regulation of molecular function	tissue development
207	207	AKT1	AKT1	11651	11651	Akt1	Akt1	0	0	1	1	0	0	0	0	0	ext	0.0662924	0.0662924	10.3	10.3	0.0257163	10.3	positive regulation of molecular function	cellular protein catabolic process
207	207	AKT1	AKT1	11651	11651	Akt1	Akt1	0	0	1	1	0	0	0	0	0	ext	0.0662924	0.0662924	10.3	10.3	0.0257163	10.3	positive regulation of molecular function	proteolysis involved in cellular protein catabolic process
207	207	AKT1	AKT1	11651	11651	Akt1	Akt1	0	0	1	1	0	0	0	0	0	ext	0.0662924	0.0662924	10.3	10.3	0.0257163	10.3	positive regulation of molecular function	negative regulation of developmental process
207	207	AKT1	AKT1	11651	11651	Akt1	Akt1	0	0	1	1	0	0	0	0	0	ext	0.0662924	0.0662924	10.3	10.3	0.0257163	10.3	positive regulation of molecular function	response to external stimulus
207	207	AKT1	AKT1	11651	11651	Akt1	Akt1	0	0	1	1	0	0	0	0	0	ext	0.0662924	0.0662924	10.3	10.3	0.0257163	10.3	positive regulation of molecular function	cell surface receptor linked signal transduction
207	207	AKT1	AKT1	11651	11651	Akt1	Akt1	0	0	1	1	0	0	0	0	0	ext	0.0662924	0.0662924	10.3	10.3	0.0257163	10.3	modification-dependent protein catabolic process	response to organic substance
207	207	AKT1	AKT1	11651	11651	Akt1	Akt1	0	0	1	1	0	0	0	0	0	ext	0.0662924	0.0662924	10.3	10.3	0.0257163	10.3	modification-dependent protein catabolic process	mitotic cell cycle
207	207	AKT1	AKT1	11651	11651	Akt1	Akt1	0	0	1	1	0	0	0	0	0	ext	0.0662924	0.0662924	10.3	10.3	0.0257163	10.3	modification-dependent protein catabolic process	homeostatic process
207	207	AKT1	AKT1	11651	11651	Akt1	Akt1	0	0	1	1	0	0	0	0	0	ext	0.0662924	0.0662924	10.3	10.3	0.0257163	10.3	modification-dependent protein catabolic process	protein amino acid phosphorylation
207	207	AKT1	AKT1	11651	11651	Akt1	Akt1	0	0	1	1	0	0	0	0	0	ext	0.0662924	0.0662924	10.3	10.3	0.0257163	10.3	modification-dependent protein catabolic process	intracellular signaling cascade
207	207	AKT1	AKT1	11651	11651	Akt1	Akt1	0	0	1	1	0	0	0	0	0	ext	0.0662924	0.0662924	10.3	10.3	0.0257163	10.3	modification-dependent protein catabolic process	positive regulation of molecular function
207	207	AKT1	AKT1	11651	11651	Akt1	Akt1	0	0	1	1	0	0	0	0	0	ext	0.0662924	0.0662924	10.3	10.3	0.0257163	10.3	modification-dependent protein catabolic process	modification-dependent protein catabolic process
207	207	AKT1	AKT1	11651	11651	Akt1	Akt1	0	0	1	1	0	0	0	0	0	ext	0.0662924	0.0662924	10.3	10.3	0.0257163	10.3	modification-dependent protein catabolic process	modification-dependent macromolecule catabolic process
207	207	AKT1	AKT1	11651	11651	Akt1	Akt1	0	0	1	1	0	0	0	0	0	ext	0.0662924	0.0662924	10.3	10.3	0.0257163	10.3	modification-dependent protein catabolic process	tissue development
207	207	AKT1	AKT1	11651	11651	Akt1	Akt1	0	0	1	1	0	0	0	0	0	ext	0.0662924	0.0662924	10.3	10.3	0.0257163	10.3	modification-dependent protein catabolic process	cellular protein catabolic process
207	207	AKT1	AKT1	11651	11651	Akt1	Akt1	0	0	1	1	0	0	0	0	0	ext	0.0662924	0.0662924	10.3	10.3	0.0257163	10.3	modification-dependent protein catabolic process	proteolysis involved in cellular protein catabolic process
207	207	AKT1	AKT1	11651	11651	Akt1	Akt1	0	0	1	1	0	0	0	0	0	ext	0.0662924	0.0662924	10.3	10.3	0.0257163	10.3	modification-dependent protein catabolic process	negative regulation of developmental process
207	207	AKT1	AKT1	11651	11651	Akt1	Akt1	0	0	1	1	0	0	0	0	0	ext	0.0662924	0.0662924	10.3	10.3	0.0257163	10.3	modification-dependent protein catabolic process	response to external stimulus
207	207	AKT1	AKT1	11651	11651	Akt1	Akt1	0	0	1	1	0	0	0	0	0	ext	0.0662924	0.0662924	10.3	10.3	0.0257163	10.3	modification-dependent protein catabolic process	cell surface receptor linked signal transduction
207	207	AKT1	AKT1	11651	11651	Akt1	Akt1	0	0	1	1	0	0	0	0	0	ext	0.0662924	0.0662924	10.3	10.3	0.0257163	10.3	modification-dependent macromolecule catabolic process	response to organic substance
207	207	AKT1	AKT1	11651	11651	Akt1	Akt1	0	0	1	1	0	0	0	0	0	ext	0.0662924	0.0662924	10.3	10.3	0.0257163	10.3	modification-dependent macromolecule catabolic process	mitotic cell cycle
207	207	AKT1	AKT1	11651	11651	Akt1	Akt1	0	0	1	1	0	0	0	0	0	ext	0.0662924	0.0662924	10.3	10.3	0.0257163	10.3	modification-dependent macromolecule catabolic process	homeostatic process
207	207	AKT1	AKT1	11651	11651	Akt1	Akt1	0	0	1	1	0	0	0	0	0	ext	0.0662924	0.0662924	10.3	10.3	0.0257163	10.3	modification-dependent macromolecule catabolic process	protein amino acid phosphorylation
207	207	AKT1	AKT1	11651	11651	Akt1	Akt1	0	0	1	1	0	0	0	0	0	ext	0.0662924	0.0662924	10.3	10.3	0.0257163	10.3	modification-dependent macromolecule catabolic process	intracellular signaling cascade
207	207	AKT1	AKT1	11651	11651	Akt1	Akt1	0	0	1	1	0	0	0	0	0	ext	0.0662924	0.0662924	10.3	10.3	0.0257163	10.3	modification-dependent macromolecule catabolic process	positive regulation of molecular function
207	207	AKT1	AKT1	11651	11651	Akt1	Akt1	0	0	1	1	0	0	0	0	0	ext	0.0662924	0.0662924	10.3	10.3	0.0257163	10.3	modification-dependent macromolecule catabolic process	modification-dependent protein catabolic process
207	207	AKT1	AKT1	11651	11651	Akt1	Akt1	0	0	1	1	0	0	0	0	0	ext	0.0662924	0.0662924	10.3	10.3	0.0257163	10.3	modification-dependent macromolecule catabolic process	modification-dependent macromolecule catabolic process
207	207	AKT1	AKT1	11651	11651	Akt1	Akt1	0	0	1	1	0	0	0	0	0	ext	0.0662924	0.0662924	10.3	10.3	0.0257163	10.3	modification-dependent macromolecule catabolic process	tissue development
207	207	AKT1	AKT1	11651	11651	Akt1	Akt1	0	0	1	1	0	0	0	0	0	ext	0.0662924	0.0662924	10.3	10.3	0.0257163	10.3	modification-dependent macromolecule catabolic process	cellular protein catabolic process
207	207	AKT1	AKT1	11651	11651	Akt1	Akt1	0	0	1	1	0	0	0	0	0	ext	0.0662924	0.0662924	10.3	10.3	0.0257163	10.3	modification-dependent macromolecule catabolic process	proteolysis involved in cellular protein catabolic process
207	207	AKT1	AKT1	11651	11651	Akt1	Akt1	0	0	1	1	0	0	0	0	0	ext	0.0662924	0.0662924	10.3	10.3	0.0257163	10.3	modification-dependent macromolecule catabolic process	negative regulation of developmental process
207	207	AKT1	AKT1	11651	11651	Akt1	Akt1	0	0	1	1	0	0	0	0	0	ext	0.0662924	0.0662924	10.3	10.3	0.0257163	10.3	modification-dependent macromolecule catabolic process	response to external stimulus
207	207	AKT1	AKT1	11651	11651	Akt1	Akt1	0	0	1	1	0	0	0	0	0	ext	0.0662924	0.0662924	10.3	10.3	0.0257163	10.3	modification-dependent macromolecule catabolic process	cell surface receptor linked signal transduction
207	207	AKT1	AKT1	11651	11651	Akt1	Akt1	0	0	1	1	0	0	0	0	0	ext	0.0662924	0.0662924	10.3	10.3	0.0257163	10.3	tissue development	response to organic substance
207	207	AKT1	AKT1	11651	11651	Akt1	Akt1	0	0	1	1	0	0	0	0	0	ext	0.0662924	0.0662924	10.3	10.3	0.0257163	10.3	tissue development	mitotic cell cycle
207	207	AKT1	AKT1	11651	11651	Akt1	Akt1	0	0	1	1	0	0	0	0	0	ext	0.0662924	0.0662924	10.3	10.3	0.0257163	10.3	tissue development	homeostatic process
207	207	AKT1	AKT1	11651	11651	Akt1	Akt1	0	0	1	1	0	0	0	0	0	ext	0.0662924	0.0662924	10.3	10.3	0.0257163	10.3	tissue development	protein amino acid phosphorylation
207	207	AKT1	AKT1	11651	11651	Akt1	Akt1	0	0	1	1	0	0	0	0	0	ext	0.0662924	0.0662924	10.3	10.3	0.0257163	10.3	tissue development	intracellular signaling cascade
207	207	AKT1	AKT1	11651	11651	Akt1	Akt1	0	0	1	1	0	0	0	0	0	ext	0.0662924	0.0662924	10.3	10.3	0.0257163	10.3	tissue development	positive regulation of molecular function
207	207	AKT1	AKT1	11651	11651	Akt1	Akt1	0	0	1	1	0	0	0	0	0	ext	0.0662924	0.0662924	10.3	10.3	0.0257163	10.3	tissue development	modification-dependent protein catabolic process
207	207	AKT1	AKT1	11651	11651	Akt1	Akt1	0	0	1	1	0	0	0	0	0	ext	0.0662924	0.0662924	10.3	10.3	0.0257163	10.3	tissue development	modification-dependent macromolecule catabolic process
207	207	AKT1	AKT1	11651	11651	Akt1	Akt1	0	0	1	1	0	0	0	0	0	ext	0.0662924	0.0662924	10.3	10.3	0.0257163	10.3	tissue development	tissue development
207	207	AKT1	AKT1	11651	11651	Akt1	Akt1	0	0	1	1	0	0	0	0	0	ext	0.0662924	0.0662924	10.3	10.3	0.0257163	10.3	tissue development	cellular protein catabolic process
207	207	AKT1	AKT1	11651	11651	Akt1	Akt1	0	0	1	1	0	0	0	0	0	ext	0.0662924	0.0662924	10.3	10.3	0.0257163	10.3	tissue development	proteolysis involved in cellular protein catabolic process
207	207	AKT1	AKT1	11651	11651	Akt1	Akt1	0	0	1	1	0	0	0	0	0	ext	0.0662924	0.0662924	10.3	10.3	0.0257163	10.3	tissue development	negative regulation of developmental process
207	207	AKT1	AKT1	11651	11651	Akt1	Akt1	0	0	1	1	0	0	0	0	0	ext	0.0662924	0.0662924	10.3	10.3	0.0257163	10.3	tissue development	response to external stimulus
207	207	AKT1	AKT1	11651	11651	Akt1	Akt1	0	0	1	1	0	0	0	0	0	ext	0.0662924	0.0662924	10.3	10.3	0.0257163	10.3	tissue development	cell surface receptor linked signal transduction
207	207	AKT1	AKT1	11651	11651	Akt1	Akt1	0	0	1	1	0	0	0	0	0	ext	0.0662924	0.0662924	10.3	10.3	0.0257163	10.3	cellular protein catabolic process	response to organic substance
207	207	AKT1	AKT1	11651	11651	Akt1	Akt1	0	0	1	1	0	0	0	0	0	ext	0.0662924	0.0662924	10.3	10.3	0.0257163	10.3	cellular protein catabolic process	mitotic cell cycle
207	207	AKT1	AKT1	11651	11651	Akt1	Akt1	0	0	1	1	0	0	0	0	0	ext	0.0662924	0.0662924	10.3	10.3	0.0257163	10.3	cellular protein catabolic process	homeostatic process
207	207	AKT1	AKT1	11651	11651	Akt1	Akt1	0	0	1	1	0	0	0	0	0	ext	0.0662924	0.0662924	10.3	10.3	0.0257163	10.3	cellular protein catabolic process	protein amino acid phosphorylation
207	207	AKT1	AKT1	11651	11651	Akt1	Akt1	0	0	1	1	0	0	0	0	0	ext	0.0662924	0.0662924	10.3	10.3	0.0257163	10.3	cellular protein catabolic process	intracellular signaling cascade
207	207	AKT1	AKT1	11651	11651	Akt1	Akt1	0	0	1	1	0	0	0	0	0	ext	0.0662924	0.0662924	10.3	10.3	0.0257163	10.3	cellular protein catabolic process	positive regulation of molecular function
207	207	AKT1	AKT1	11651	11651	Akt1	Akt1	0	0	1	1	0	0	0	0	0	ext	0.0662924	0.0662924	10.3	10.3	0.0257163	10.3	cellular protein catabolic process	modification-dependent protein catabolic process
207	207	AKT1	AKT1	11651	11651	Akt1	Akt1	0	0	1	1	0	0	0	0	0	ext	0.0662924	0.0662924	10.3	10.3	0.0257163	10.3	cellular protein catabolic process	modification-dependent macromolecule catabolic process
207	207	AKT1	AKT1	11651	11651	Akt1	Akt1	0	0	1	1	0	0	0	0	0	ext	0.0662924	0.0662924	10.3	10.3	0.0257163	10.3	cellular protein catabolic process	tissue development
207	207	AKT1	AKT1	11651	11651	Akt1	Akt1	0	0	1	1	0	0	0	0	0	ext	0.0662924	0.0662924	10.3	10.3	0.0257163	10.3	cellular protein catabolic process	cellular protein catabolic process
207	207	AKT1	AKT1	11651	11651	Akt1	Akt1	0	0	1	1	0	0	0	0	0	ext	0.0662924	0.0662924	10.3	10.3	0.0257163	10.3	cellular protein catabolic process	proteolysis involved in cellular protein catabolic process
207	207	AKT1	AKT1	11651	11651	Akt1	Akt1	0	0	1	1	0	0	0	0	0	ext	0.0662924	0.0662924	10.3	10.3	0.0257163	10.3	cellular protein catabolic process	negative regulation of developmental process
207	207	AKT1	AKT1	11651	11651	Akt1	Akt1	0	0	1	1	0	0	0	0	0	ext	0.0662924	0.0662924	10.3	10.3	0.0257163	10.3	cellular protein catabolic process	response to external stimulus
207	207	AKT1	AKT1	11651	11651	Akt1	Akt1	0	0	1	1	0	0	0	0	0	ext	0.0662924	0.0662924	10.3	10.3	0.0257163	10.3	cellular protein catabolic process	cell surface receptor linked signal transduction
207	207	AKT1	AKT1	11651	11651	Akt1	Akt1	0	0	1	1	0	0	0	0	0	ext	0.0662924	0.0662924	10.3	10.3	0.0257163	10.3	proteolysis involved in cellular protein catabolic process	response to organic substance
207	207	AKT1	AKT1	11651	11651	Akt1	Akt1	0	0	1	1	0	0	0	0	0	ext	0.0662924	0.0662924	10.3	10.3	0.0257163	10.3	proteolysis involved in cellular protein catabolic process	mitotic cell cycle
207	207	AKT1	AKT1	11651	11651	Akt1	Akt1	0	0	1	1	0	0	0	0	0	ext	0.0662924	0.0662924	10.3	10.3	0.0257163	10.3	proteolysis involved in cellular protein catabolic process	homeostatic process
207	207	AKT1	AKT1	11651	11651	Akt1	Akt1	0	0	1	1	0	0	0	0	0	ext	0.0662924	0.0662924	10.3	10.3	0.0257163	10.3	proteolysis involved in cellular protein catabolic process	protein amino acid phosphorylation
207	207	AKT1	AKT1	11651	11651	Akt1	Akt1	0	0	1	1	0	0	0	0	0	ext	0.0662924	0.0662924	10.3	10.3	0.0257163	10.3	proteolysis involved in cellular protein catabolic process	intracellular signaling cascade
207	207	AKT1	AKT1	11651	11651	Akt1	Akt1	0	0	1	1	0	0	0	0	0	ext	0.0662924	0.0662924	10.3	10.3	0.0257163	10.3	proteolysis involved in cellular protein catabolic process	positive regulation of molecular function
207	207	AKT1	AKT1	11651	11651	Akt1	Akt1	0	0	1	1	0	0	0	0	0	ext	0.0662924	0.0662924	10.3	10.3	0.0257163	10.3	proteolysis involved in cellular protein catabolic process	modification-dependent protein catabolic process
207	207	AKT1	AKT1	11651	11651	Akt1	Akt1	0	0	1	1	0	0	0	0	0	ext	0.0662924	0.0662924	10.3	10.3	0.0257163	10.3	proteolysis involved in cellular protein catabolic process	modification-dependent macromolecule catabolic process
207	207	AKT1	AKT1	11651	11651	Akt1	Akt1	0	0	1	1	0	0	0	0	0	ext	0.0662924	0.0662924	10.3	10.3	0.0257163	10.3	proteolysis involved in cellular protein catabolic process	tissue development
207	207	AKT1	AKT1	11651	11651	Akt1	Akt1	0	0	1	1	0	0	0	0	0	ext	0.0662924	0.0662924	10.3	10.3	0.0257163	10.3	proteolysis involved in cellular protein catabolic process	cellular protein catabolic process
207	207	AKT1	AKT1	11651	11651	Akt1	Akt1	0	0	1	1	0	0	0	0	0	ext	0.0662924	0.0662924	10.3	10.3	0.0257163	10.3	proteolysis involved in cellular protein catabolic process	proteolysis involved in cellular protein catabolic process
207	207	AKT1	AKT1	11651	11651	Akt1	Akt1	0	0	1	1	0	0	0	0	0	ext	0.0662924	0.0662924	10.3	10.3	0.0257163	10.3	proteolysis involved in cellular protein catabolic process	negative regulation of developmental process
207	207	AKT1	AKT1	11651	11651	Akt1	Akt1	0	0	1	1	0	0	0	0	0	ext	0.0662924	0.0662924	10.3	10.3	0.0257163	10.3	proteolysis involved in cellular protein catabolic process	response to external stimulus
207	207	AKT1	AKT1	11651	11651	Akt1	Akt1	0	0	1	1	0	0	0	0	0	ext	0.0662924	0.0662924	10.3	10.3	0.0257163	10.3	proteolysis involved in cellular protein catabolic process	cell surface receptor linked signal transduction
207	207	AKT1	AKT1	11651	11651	Akt1	Akt1	0	0	1	1	0	0	0	0	0	ext	0.0662924	0.0662924	10.3	10.3	0.0257163	10.3	negative regulation of developmental process	response to organic substance
207	207	AKT1	AKT1	11651	11651	Akt1	Akt1	0	0	1	1	0	0	0	0	0	ext	0.0662924	0.0662924	10.3	10.3	0.0257163	10.3	negative regulation of developmental process	mitotic cell cycle
207	207	AKT1	AKT1	11651	11651	Akt1	Akt1	0	0	1	1	0	0	0	0	0	ext	0.0662924	0.0662924	10.3	10.3	0.0257163	10.3	negative regulation of developmental process	homeostatic process
207	207	AKT1	AKT1	11651	11651	Akt1	Akt1	0	0	1	1	0	0	0	0	0	ext	0.0662924	0.0662924	10.3	10.3	0.0257163	10.3	negative regulation of developmental process	protein amino acid phosphorylation
207	207	AKT1	AKT1	11651	11651	Akt1	Akt1	0	0	1	1	0	0	0	0	0	ext	0.0662924	0.0662924	10.3	10.3	0.0257163	10.3	negative regulation of developmental process	intracellular signaling cascade
207	207	AKT1	AKT1	11651	11651	Akt1	Akt1	0	0	1	1	0	0	0	0	0	ext	0.0662924	0.0662924	10.3	10.3	0.0257163	10.3	negative regulation of developmental process	positive regulation of molecular function
207	207	AKT1	AKT1	11651	11651	Akt1	Akt1	0	0	1	1	0	0	0	0	0	ext	0.0662924	0.0662924	10.3	10.3	0.0257163	10.3	negative regulation of developmental process	modification-dependent protein catabolic process
207	207	AKT1	AKT1	11651	11651	Akt1	Akt1	0	0	1	1	0	0	0	0	0	ext	0.0662924	0.0662924	10.3	10.3	0.0257163	10.3	negative regulation of developmental process	modification-dependent macromolecule catabolic process
207	207	AKT1	AKT1	11651	11651	Akt1	Akt1	0	0	1	1	0	0	0	0	0	ext	0.0662924	0.0662924	10.3	10.3	0.0257163	10.3	negative regulation of developmental process	tissue development
207	207	AKT1	AKT1	11651	11651	Akt1	Akt1	0	0	1	1	0	0	0	0	0	ext	0.0662924	0.0662924	10.3	10.3	0.0257163	10.3	negative regulation of developmental process	cellular protein catabolic process
207	207	AKT1	AKT1	11651	11651	Akt1	Akt1	0	0	1	1	0	0	0	0	0	ext	0.0662924	0.0662924	10.3	10.3	0.0257163	10.3	negative regulation of developmental process	proteolysis involved in cellular protein catabolic process
207	207	AKT1	AKT1	11651	11651	Akt1	Akt1	0	0	1	1	0	0	0	0	0	ext	0.0662924	0.0662924	10.3	10.3	0.0257163	10.3	negative regulation of developmental process	negative regulation of developmental process
207	207	AKT1	AKT1	11651	11651	Akt1	Akt1	0	0	1	1	0	0	0	0	0	ext	0.0662924	0.0662924	10.3	10.3	0.0257163	10.3	negative regulation of developmental process	response to external stimulus
207	207	AKT1	AKT1	11651	11651	Akt1	Akt1	0	0	1	1	0	0	0	0	0	ext	0.0662924	0.0662924	10.3	10.3	0.0257163	10.3	negative regulation of developmental process	cell surface receptor linked signal transduction
207	207	AKT1	AKT1	11651	11651	Akt1	Akt1	0	0	1	1	0	0	0	0	0	ext	0.0662924	0.0662924	10.3	10.3	0.0257163	10.3	response to external stimulus	response to organic substance
207	207	AKT1	AKT1	11651	11651	Akt1	Akt1	0	0	1	1	0	0	0	0	0	ext	0.0662924	0.0662924	10.3	10.3	0.0257163	10.3	response to external stimulus	mitotic cell cycle
207	207	AKT1	AKT1	11651	11651	Akt1	Akt1	0	0	1	1	0	0	0	0	0	ext	0.0662924	0.0662924	10.3	10.3	0.0257163	10.3	response to external stimulus	homeostatic process
207	207	AKT1	AKT1	11651	11651	Akt1	Akt1	0	0	1	1	0	0	0	0	0	ext	0.0662924	0.0662924	10.3	10.3	0.0257163	10.3	response to external stimulus	protein amino acid phosphorylation
207	207	AKT1	AKT1	11651	11651	Akt1	Akt1	0	0	1	1	0	0	0	0	0	ext	0.0662924	0.0662924	10.3	10.3	0.0257163	10.3	response to external stimulus	intracellular signaling cascade
[truncated: 6,250 more rows]

## Sheet: Process network F6A
Entrez gene ID human A	Entrez gene ID human B	Symbol human A	Symbol human B	Entrez gene ID mouse A	Entrez gene ID mouse B	Symbol mouse A	Symbol mouse B	Y2H	MAN	EXT	UNIHI	Clock core	Clock core A	Clock core B	Regulatory component A	Regulatory component B	Interaction source	FDR A (rhythmic transcript)	FDR B (rhythmic transcript)	mRNA peak phase A (circadian time)	mRNA peak phase B (circadian time)	FDR PPI (rhythmic expression)	predicted peak phase PPI (circadian time)	GO A	GO B
406	9575	ARNTL	CLOCK	11865	12753	Arntl	Clock	1	0	1	1	1	1	1	0	0	unihi.y2h	0	0	22.4	23	0	22.6	circadian rhythm	circadian rhythm
406	4862	ARNTL	NPAS2	11865	18143	Arntl	Npas2	1	0	1	1	1	1	1	0	0	unihi.y2h	0	0	22.4	0.9	0	23.5	circadian rhythm	circadian rhythm
406	1407	ARNTL	CRY1	11865	12952	Arntl	Cry1	1	0	1	1	1	1	1	0	0	unihi.y2h	0	0	22.4	19.8	0	21.2	circadian rhythm	circadian rhythm
406	1408	ARNTL	CRY2	11865	12953	Arntl	Cry2	1	0	1	0	1	1	1	0	0	y2h	0	0.0425479	22.4	9.2	0	22.5	circadian rhythm	circadian rhythm
406	8553	ARNTL	BHLHE40	11865	20893	Arntl	Bhlhb2	1	0	1	1	1	1	1	0	0	unihi.y2h	0	0.000859098	22.4	12.4	0	21.5	circadian rhythm	circadian rhythm
1407	9575	CRY1	CLOCK	12952	12753	Cry1	Clock	1	0	1	0	1	1	1	0	0	y2h	0	0	19.8	23	0	20.7	circadian rhythm	circadian rhythm
1407	4862	CRY1	NPAS2	12952	18143	Cry1	Npas2	1	0	1	0	1	1	1	0	0	y2h	0	0	19.8	0.9	0	22.1	circadian rhythm	circadian rhythm
1407	5187	CRY1	PER1	12952	18626	Cry1	Per1	1	0	1	1	1	1	1	0	0	unihi.y2h	0	0	19.8	17.7	0	18.6	circadian rhythm	circadian rhythm
1407	8553	CRY1	BHLHE40	12952	20893	Cry1	Bhlhb2	1	0	1	0	1	1	1	0	0	y2h	0	0.000859098	19.8	12.4	0	18.6	circadian rhythm	circadian rhythm
1407	8864	CRY1	PER2	12952	18627	Cry1	Per2	1	0	1	1	1	1	1	0	0	unihi.y2h	0	0	19.8	20.1	0	17.1	circadian rhythm	circadian rhythm
1408	9575	CRY2	CLOCK	12953	12753	Cry2	Clock	1	0	1	0	1	1	1	0	0	y2h	0.0425479	0	9.2	23	0	0	circadian rhythm	circadian rhythm
1408	4862	CRY2	NPAS2	12953	18143	Cry2	Npas2	1	0	1	0	1	1	1	0	0	y2h	0.0425479	0	9.2	0.9	0	1.6	circadian rhythm	circadian rhythm
1408	5187	CRY2	PER1	12953	18626	Cry2	Per1	1	0	1	1	1	1	1	0	0	unihi.y2h	0.0425479	0	9.2	17.7	2.73973e-05	10.9	circadian rhythm	circadian rhythm
1408	8553	CRY2	BHLHE40	12953	20893	Cry2	Bhlhb2	1	0	1	0	1	1	1	0	0	y2h	0.0425479	0.000859098	9.2	12.4	0.000711864	11.3	circadian rhythm	circadian rhythm
1408	8864	CRY2	PER2	12953	18627	Cry2	Per2	1	0	1	1	1	1	1	0	0	unihi.y2h	0.0425479	0	9.2	20.1	0	13.5	circadian rhythm	circadian rhythm
4862	9575	NPAS2	CLOCK	18143	12753	Npas2	Clock	1	0	1	0	1	1	1	0	0	y2h	0	0	0.9	23	0	0.3	circadian rhythm	circadian rhythm
4862	8553	NPAS2	BHLHE40	18143	20893	Npas2	Bhlhb2	1	0	1	0	1	1	1	0	0	y2h	0	0.000859098	0.9	12.4	9.38628e-05	1.1	circadian rhythm	circadian rhythm
5187	8553	PER1	BHLHE40	18626	20893	Per1	Bhlhb2	1	0	1	0	1	1	1	0	0	y2h	0	0.000859098	17.7	12.4	0	11.9	circadian rhythm	circadian rhythm
8553	9575	BHLHE40	CLOCK	20893	12753	Bhlhb2	Clock	1	0	1	0	1	1	1	0	0	y2h	0.000859098	0	12.4	23	0.0452461	19.8	circadian rhythm	circadian rhythm
8553	8864	BHLHE40	PER2	20893	18627	Bhlhb2	Per2	1	0	1	0	1	1	1	0	0	y2h	0.000859098	0	12.4	20.1	0	13.6	circadian rhythm	circadian rhythm
8864	9575	PER2	CLOCK	18627	12753	Per2	Clock	1	0	1	0	1	1	1	0	0	y2h	0	0	20.1	23	0	15.8	circadian rhythm	circadian rhythm
5187	8864	PER1	PER2	18626	18627	Per1	Per2	0	1	1	1	1	1	1	0	0	man	0	0	17.7	20.1	0	13.3	circadian rhythm	circadian rhythm
8864	9572	PER2	NR1D1	18627	217166	Per2	Nr1d1	0	1	0	0	1	1	1	0	0	man	0	0	20.1	6.8	0	10.8	circadian rhythm	circadian rhythm
1407	8914	CRY1	TIMELESS	12952	21853	Cry1	Timeless	0	0	1	1	1	1	1	0	0	unihi	0	0.300916	19.8	19.6	0	19.8	circadian rhythm	circadian rhythm
1408	8914	CRY2	TIMELESS	12953	21853	Cry2	Timeless	0	0	1	1	1	1	1	0	0	unihi	0.0425479	0.300916	9.2	19.6	0.347146	10.3	circadian rhythm	circadian rhythm
5187	8914	PER1	TIMELESS	18626	21853	Per1	Timeless	0	0	1	1	1	1	1	0	0	unihi	0	0.300916	17.7	19.6	4.89796e-05	12.4	circadian rhythm	circadian rhythm
8864	8914	PER2	TIMELESS	18627	21853	Per2	Timeless	0	0	1	1	1	1	1	0	0	unihi	0	0.300916	20.1	19.6	0	14.4	circadian rhythm	circadian rhythm
9575	56938	CLOCK	ARNTL2	12753	272322	Clock	Arntl2	0	0	1	1	1	1	1	0	0	unihi	0	0.37551	23	16.5	0	22.6	circadian rhythm	circadian rhythm
1408	2146	CRY2	EZH2	12953	14056	Cry2	Ezh2	1	0	1	0	1	1	1	0	0	y2h	0.0425479	0.00842676	9.2	5.7	0.000846154	7.6	circadian rhythm	chromatin modification
406	2146	ARNTL	EZH2	11865	14056	Arntl	Ezh2	0	1	0	0	1	1	1	0	0	man	0	0.00842676	22.4	5.7	0	22.8	circadian rhythm	chromatin modification
406	2033	ARNTL	EP300	11865	328572	Arntl	Ep300	0	0	1	1	0	1	0	0	0	ext	0	0.0181655	22.4	5.6	0	22.9	circadian rhythm	chromatin modification
406	8850	ARNTL	KAT2B	11865	18519	Arntl	Kat2b	0	0	1	1	0	1	0	0	0	ext	0	0	22.4	8.4	0	22.6	circadian rhythm	chromatin modification
4862	8850	NPAS2	KAT2B	18143	18519	Npas2	Kat2b	0	0	1	1	0	1	0	0	0	ext	0	0	0.9	8.4	0	1.6	circadian rhythm	chromatin modification
9572	9611	NR1D1	NCOR1	217166	20185	Nr1d1	Ncor1	0	0	1	1	0	1	0	0	0	ext	0	0.000292467	6.8	3.1	0	6.4	circadian rhythm	chromatin modification
2146	8553	EZH2	BHLHE40	14056	20893	Ezh2	Bhlhb2	1	0	1	0	1	1	1	0	0	y2h	0.00842676	0.000859098	5.7	12.4	0.000875	10.6	chromatin modification	circadian rhythm
2146	9575	EZH2	CLOCK	14056	12753	Ezh2	Clock	0	1	0	0	1	1	1	0	0	man	0.00842676	0	5.7	23	0	0.4	chromatin modification	circadian rhythm
1387	4862	CREBBP	NPAS2	12914	18143	Crebbp	Npas2	0	0	1	1	0	0	1	0	0	ext	0.000545079	0	3.6	0.9	0	1.8	chromatin modification	circadian rhythm
2033	9575	EP300	CLOCK	328572	12753	Ep300	Clock	0	0	1	1	0	0	1	0	0	ext	0.0181655	0	5.6	23	0	0.6	chromatin modification	circadian rhythm
2033	4862	EP300	NPAS2	328572	18143	Ep300	Npas2	0	0	1	1	0	0	1	0	0	ext	0.0181655	0	5.6	0.9	0	1.6	chromatin modification	circadian rhythm
8850	9575	KAT2B	CLOCK	18519	12753	Kat2b	Clock	0	0	1	1	0	0	1	0	0	ext	0	0	8.4	23	0	0.3	chromatin modification	circadian rhythm
406	1407	ARNTL	CRY1	11865	12952	Arntl	Cry1	1	0	1	1	1	1	1	0	0	unihi.y2h	0	0	22.4	19.8	0	21.2	circadian rhythm	DNA repair
406	1408	ARNTL	CRY2	11865	12953	Arntl	Cry2	1	0	1	0	1	1	1	0	0	y2h	0	0.0425479	22.4	9.2	0	22.5	circadian rhythm	DNA repair
406	1454	ARNTL	CSNK1E	11865	27373	Arntl	Csnk1e	1	0	1	1	1	1	1	0	1	unihi.y2h	0	0.0768418	22.4	16.6	0	22.1	circadian rhythm	DNA repair
1407	1454	CRY1	CSNK1E	12952	27373	Cry1	Csnk1e	1	1	1	1	1	1	1	0	1	man.y2h	0	0.0768418	19.8	16.6	0	19.6	circadian rhythm	DNA repair
1407	1453	CRY1	CSNK1D	12952	104318	Cry1	Csnk1d	0	1	0	0	1	1	1	0	1	man	0	0.029129	19.8	2.8	0	20.2	circadian rhythm	DNA repair
1408	1453	CRY2	CSNK1D	12953	104318	Cry2	Csnk1d	0	1	0	0	1	1	1	0	1	man	0.0425479	0.029129	9.2	2.8	0.0819775	7.1	circadian rhythm	DNA repair
8914	11277	TIMELESS	TREX1	21853	22040	Timeless	Trex1	0	0	1	1	0	1	0	0	0	ext	0.300916	0.0486737	19.6	3.7	0.385361	23.8	circadian rhythm	DNA repair
1407	9575	CRY1	CLOCK	12952	12753	Cry1	Clock	1	0	1	0	1	1	1	0	0	y2h	0	0	19.8	23	0	20.7	DNA repair	circadian rhythm
1407	4862	CRY1	NPAS2	12952	18143	Cry1	Npas2	1	0	1	0	1	1	1	0	0	y2h	0	0	19.8	0.9	0	22.1	DNA repair	circadian rhythm
1407	5187	CRY1	PER1	12952	18626	Cry1	Per1	1	0	1	1	1	1	1	0	0	unihi.y2h	0	0	19.8	17.7	0	18.6	DNA repair	circadian rhythm
1407	8553	CRY1	BHLHE40	12952	20893	Cry1	Bhlhb2	1	0	1	0	1	1	1	0	0	y2h	0	0.000859098	19.8	12.4	0	18.6	DNA repair	circadian rhythm
1407	8864	CRY1	PER2	12952	18627	Cry1	Per2	1	0	1	1	1	1	1	0	0	unihi.y2h	0	0	19.8	20.1	0	17.1	DNA repair	circadian rhythm
1408	9575	CRY2	CLOCK	12953	12753	Cry2	Clock	1	0	1	0	1	1	1	0	0	y2h	0.0425479	0	9.2	23	0	0	DNA repair	circadian rhythm
1408	4862	CRY2	NPAS2	12953	18143	Cry2	Npas2	1	0	1	0	1	1	1	0	0	y2h	0.0425479	0	9.2	0.9	0	1.6	DNA repair	circadian rhythm
1408	5187	CRY2	PER1	12953	18626	Cry2	Per1	1	0	1	1	1	1	1	0	0	unihi.y2h	0.0425479	0	9.2	17.7	2.73973e-05	10.9	DNA repair	circadian rhythm
1408	8553	CRY2	BHLHE40	12953	20893	Cry2	Bhlhb2	1	0	1	0	1	1	1	0	0	y2h	0.0425479	0.000859098	9.2	12.4	0.000711864	11.3	DNA repair	circadian rhythm
1408	8864	CRY2	PER2	12953	18627	Cry2	Per2	1	0	1	1	1	1	1	0	0	unihi.y2h	0.0425479	0	9.2	20.1	0	13.5	DNA repair	circadian rhythm
1453	8864	CSNK1D	PER2	104318	18627	Csnk1d	Per2	1	0	1	1	1	1	1	1	0	unihi.y2h	0.029129	0	2.8	20.1	0	14	DNA repair	circadian rhythm
1454	9575	CSNK1E	CLOCK	27373	12753	Csnk1e	Clock	1	0	1	0	1	1	1	1	0	y2h	0.0768418	0	16.6	23	0	22.4	DNA repair	circadian rhythm
1454	5187	CSNK1E	PER1	27373	18626	Csnk1e	Per1	1	0	1	1	1	1	1	1	0	unihi.y2h	0.0768418	0	16.6	17.7	0	12.4	DNA repair	circadian rhythm
1454	8864	CSNK1E	PER2	27373	18627	Csnk1e	Per2	1	0	1	1	1	1	1	1	0	unihi.y2h	0.0768418	0	16.6	20.1	0	14.2	DNA repair	circadian rhythm
1454	8553	CSNK1E	BHLHE40	27373	20893	Csnk1e	Bhlhb2	1	0	1	0	1	1	1	1	0	y2h	0.0768418	0.000859098	16.6	12.4	9.55882e-05	13	DNA repair	circadian rhythm
4841	8553	NONO	BHLHE40	53610	20893	Nono	Bhlhb2	1	0	1	0	1	1	1	0	0	y2h	0	0.000859098	4.1	12.4	0.000351852	11.9	DNA repair	circadian rhythm
4841	5187	NONO	PER1	53610	18626	Nono	Per1	0	1	0	0	1	1	1	0	0	man	0	0	4.1	17.7	0	11.3	DNA repair	circadian rhythm
4841	8864	NONO	PER2	53610	18627	Nono	Per2	0	1	0	0	1	1	1	0	0	man	0	0	4.1	20.1	0	14	DNA repair	circadian rhythm
1407	8914	CRY1	TIMELESS	12952	21853	Cry1	Timeless	0	0	1	1	1	1	1	0	0	unihi	0	0.300916	19.8	19.6	0	19.8	DNA repair	circadian rhythm
1408	8914	CRY2	TIMELESS	12953	21853	Cry2	Timeless	0	0	1	1	1	1	1	0	0	unihi	0.0425479	0.300916	9.2	19.6	0.347146	10.3	DNA repair	circadian rhythm
1453	5187	CSNK1D	PER1	104318	18626	Csnk1d	Per1	0	0	1	1	1	1	1	1	0	unihi	0.029129	0	2.8	17.7	0.000747899	10.8	DNA repair	circadian rhythm
1111	8914	CHEK1	TIMELESS	12649	21853	Chek1	Timeless	0	0	1	1	0	0	1	0	0	ext	0.0379367	0.300916	12	19.6	0.12388	14.8	DNA repair	circadian rhythm
406	2034	ARNTL	EPAS1	11865	13819	Arntl	Epas1	0	0	1	1	0	1	0	0	0	ext	0	0.239529	22.4	7.4	0	22.5	circadian rhythm	hemopoiesis
406	3091	ARNTL	HIF1A	11865	15251	Arntl	Hif1a	0	0	1	1	0	1	0	0	0	ext	0	0.00680597	22.4	9.6	0	22.4	circadian rhythm	hemopoiesis
4862	5914	NPAS2	RARA	18143	19401	Npas2	Rara	0	0	1	1	0	1	0	0	0	ext	0	0.329247	0.9	18	0	0.6	circadian rhythm	hemopoiesis
2034	56938	EPAS1	ARNTL2	13819	272322	Epas1	Arntl2	0	0	1	1	0	0	1	0	0	ext	0.239529	0.37551	7.4	16.5	0.398957	9.4	hemopoiesis	circadian rhythm
3091	5187	HIF1A	PER1	15251	18626	Hif1a	Per1	0	0	1	1	0	0	1	0	0	ext	0.00680597	0	9.6	17.7	0	11.4	hemopoiesis	circadian rhythm
8864	8945	PER2	BTRC	18627	12234	Per2	Btrc	0	1	0	0	1	1	1	0	1	man	0	0.0144088	20.1	5.2	0	13.8	circadian rhythm	interspecies interaction between organisms
406	2033	ARNTL	EP300	11865	328572	Arntl	Ep300	0	0	1	1	0	1	0	0	0	ext	0	0.0181655	22.4	5.6	0	22.9	circadian rhythm	interspecies interaction between organisms
406	8850	ARNTL	KAT2B	11865	18519	Arntl	Kat2b	0	0	1	1	0	1	0	0	0	ext	0	0	22.4	8.4	0	22.6	circadian rhythm	interspecies interaction between organisms
4862	6256	NPAS2	RXRA	18143	20181	Npas2	Rxra	0	0	1	1	0	1	0	0	0	ext	0	0.00211631	0.9	6.9	0	1.6	circadian rhythm	interspecies interaction between organisms
4862	8850	NPAS2	KAT2B	18143	18519	Npas2	Kat2b	0	0	1	1	0	1	0	0	0	ext	0	0	0.9	8.4	0	1.6	circadian rhythm	interspecies interaction between organisms
1387	4862	CREBBP	NPAS2	12914	18143	Crebbp	Npas2	0	0	1	1	0	0	1	0	0	ext	0.000545079	0	3.6	0.9	0	1.8	interspecies interaction between organisms	circadian rhythm
2033	9575	EP300	CLOCK	328572	12753	Ep300	Clock	0	0	1	1	0	0	1	0	0	ext	0.0181655	0	5.6	23	0	0.6	interspecies interaction between organisms	circadian rhythm
2033	4862	EP300	NPAS2	328572	18143	Ep300	Npas2	0	0	1	1	0	0	1	0	0	ext	0.0181655	0	5.6	0.9	0	1.6	interspecies interaction between organisms	circadian rhythm
6774	8553	STAT3	BHLHE40	20848	20893	Stat3	Bhlhb2	0	0	1	1	0	0	1	0	0	ext	0.00255469	0.000859098	3.2	12.4	0.177285	9.1	interspecies interaction between organisms	circadian rhythm
7329	8553	UBE2I	BHLHE40	22196	20893	Ube2i	Bhlhb2	0	0	1	1	0	0	1	0	0	ext	0.000613374	0.000859098	5.1	12.4	0.00408706	10.8	interspecies interaction between organisms	circadian rhythm
8850	9575	KAT2B	CLOCK	18519	12753	Kat2b	Clock	0	0	1	1	0	0	1	0	0	ext	0	0	8.4	23	0	0.3	interspecies interaction between organisms	circadian rhythm
406	3320	ARNTL	HSP90AA1	11865	15519	Arntl	Hsp90aa1	0	0	1	1	0	1	0	0	0	ext	0	0	22.4	19.2	0	21.7	circadian rhythm	response to organic substance
4862	5914	NPAS2	RARA	18143	19401	Npas2	Rara	0	0	1	1	0	1	0	0	0	ext	0	0.329247	0.9	18	0	0.6	circadian rhythm	response to organic substance
5515	8553	PPP2CA	BHLHE40	19052	20893	Ppp2ca	Bhlhb2	1	0	1	0	1	1	1	1	0	y2h	0.023019	0.000859098	9.1	12.4	3.84615e-05	11.9	response to organic substance	circadian rhythm
5518	8553	PPP2R1A	BHLHE40	51792	20893	Ppp2r1a	Bhlhb2	1	0	1	0	1	1	1	1	0	y2h	0.000944137	0.000859098	3.7	12.4	0.029	10.6	response to organic substance	circadian rhythm
5578	8864	PRKCA	PER2	18750	18627	Prkca	Per2	0	1	0	0	1	1	1	1	0	man	0.00678513	0	7.5	20.1	0	13.6	response to organic substance	circadian rhythm
3320	4862	HSP90AA1	NPAS2	15519	18143	Hsp90aa1	Npas2	0	0	1	1	0	0	1	0	0	ext	0	0	19.2	0.9	0	23.5	response to organic substance	circadian rhythm
6774	8553	STAT3	BHLHE40	20848	20893	Stat3	Bhlhb2	0	0	1	1	0	0	1	0	0	ext	0.00255469	0.000859098	3.2	12.4	0.177285	9.1	response to organic substance	circadian rhythm
8864	8945	PER2	BTRC	18627	12234	Per2	Btrc	0	1	0	0	1	1	1	0	1	man	0	0.0144088	20.1	5.2	0	13.8	circadian rhythm	positive regulation of molecular function
406	2033	ARNTL	EP300	11865	328572	Arntl	Ep300	0	0	1	1	0	1	0	0	0	ext	0	0.0181655	22.4	5.6	0	22.9	circadian rhythm	positive regulation of molecular function
406	3091	ARNTL	HIF1A	11865	15251	Arntl	Hif1a	0	0	1	1	0	1	0	0	0	ext	0	0.00680597	22.4	9.6	0	22.4	circadian rhythm	positive regulation of molecular function
2033	9575	EP300	CLOCK	328572	12753	Ep300	Clock	0	0	1	1	0	0	1	0	0	ext	0.0181655	0	5.6	23	0	0.6	positive regulation of molecular function	circadian rhythm
2033	4862	EP300	NPAS2	328572	18143	Ep300	Npas2	0	0	1	1	0	0	1	0	0	ext	0.0181655	0	5.6	0.9	0	1.6	positive regulation of molecular function	circadian rhythm
3091	5187	HIF1A	PER1	15251	18626	Hif1a	Per1	0	0	1	1	0	0	1	0	0	ext	0.00680597	0	9.6	17.7	0	11.4	positive regulation of molecular function	circadian rhythm
406	9575	ARNTL	CLOCK	11865	12753	Arntl	Clock	1	0	1	1	1	1	1	0	0	unihi.y2h	0	0	22.4	23	0	22.6	circadian rhythm	positive regulation of transcription from RNA polymerase II promoter
406	4862	ARNTL	NPAS2	11865	18143	Arntl	Npas2	1	0	1	1	1	1	1	0	0	unihi.y2h	0	0	22.4	0.9	0	23.5	circadian rhythm	positive regulation of transcription from RNA polymerase II promoter
1407	9575	CRY1	CLOCK	12952	12753	Cry1	Clock	1	0	1	0	1	1	1	0	0	y2h	0	0	19.8	23	0	20.7	circadian rhythm	positive regulation of transcription from RNA polymerase II promoter
1407	4862	CRY1	NPAS2	12952	18143	Cry1	Npas2	1	0	1	0	1	1	1	0	0	y2h	0	0	19.8	0.9	0	22.1	circadian rhythm	positive regulation of transcription from RNA polymerase II promoter
1408	9575	CRY2	CLOCK	12953	12753	Cry2	Clock	1	0	1	0	1	1	1	0	0	y2h	0.0425479	0	9.2	23	0	0	circadian rhythm	positive regulation of transcription from RNA polymerase II promoter
1408	4862	CRY2	NPAS2	12953	18143	Cry2	Npas2	1	0	1	0	1	1	1	0	0	y2h	0.0425479	0	9.2	0.9	0	1.6	circadian rhythm	positive regulation of transcription from RNA polymerase II promoter
4862	9575	NPAS2	CLOCK	18143	12753	Npas2	Clock	1	0	1	0	1	1	1	0	0	y2h	0	0	0.9	23	0	0.3	circadian rhythm	positive regulation of transcription from RNA polymerase II promoter
8553	9575	BHLHE40	CLOCK	20893	12753	Bhlhb2	Clock	1	0	1	0	1	1	1	0	0	y2h	0.000859098	0	12.4	23	0.0452461	19.8	circadian rhythm	positive regulation of transcription from RNA polymerase II promoter
8864	9575	PER2	CLOCK	18627	12753	Per2	Clock	1	0	1	0	1	1	1	0	0	y2h	0	0	20.1	23	0	15.8	circadian rhythm	positive regulation of transcription from RNA polymerase II promoter
406	2033	ARNTL	EP300	11865	328572	Arntl	Ep300	0	0	1	1	0	1	0	0	0	ext	0	0.0181655	22.4	5.6	0	22.9	circadian rhythm	positive regulation of transcription from RNA polymerase II promoter
406	2034	ARNTL	EPAS1	11865	13819	Arntl	Epas1	0	0	1	1	0	1	0	0	0	ext	0	0.239529	22.4	7.4	0	22.5	circadian rhythm	positive regulation of transcription from RNA polymerase II promoter
406	3091	ARNTL	HIF1A	11865	15251	Arntl	Hif1a	0	0	1	1	0	1	0	0	0	ext	0	0.00680597	22.4	9.6	0	22.4	circadian rhythm	positive regulation of transcription from RNA polymerase II promoter
406	266743	ARNTL	NPAS4	11865	225872	Arntl	Npas4	0	0	1	1	0	1	0	0	0	ext	0	0.30441	22.4	19.5	0	22.2	circadian rhythm	positive regulation of transcription from RNA polymerase II promoter
4862	6256	NPAS2	RXRA	18143	20181	Npas2	Rxra	0	0	1	1	0	1	0	0	0	ext	0	0.00211631	0.9	6.9	0	1.6	circadian rhythm	positive regulation of transcription from RNA polymerase II promoter
406	1407	ARNTL	CRY1	11865	12952	Arntl	Cry1	1	0	1	1	1	1	1	0	0	unihi.y2h	0	0	22.4	19.8	0	21.2	positive regulation of transcription from RNA polymerase II promoter	circadian rhythm
406	1408	ARNTL	CRY2	11865	12953	Arntl	Cry2	1	0	1	0	1	1	1	0	0	y2h	0	0.0425479	22.4	9.2	0	22.5	positive regulation of transcription from RNA polymerase II promoter	circadian rhythm
406	8553	ARNTL	BHLHE40	11865	20893	Arntl	Bhlhb2	1	0	1	1	1	1	1	0	0	unihi.y2h	0	0.000859098	22.4	12.4	0	21.5	positive regulation of transcription from RNA polymerase II promoter	circadian rhythm
4862	8553	NPAS2	BHLHE40	18143	20893	Npas2	Bhlhb2	1	0	1	0	1	1	1	0	0	y2h	0	0.000859098	0.9	12.4	9.38628e-05	1.1	positive regulation of transcription from RNA polymerase II promoter	circadian rhythm
9575	56938	CLOCK	ARNTL2	12753	272322	Clock	Arntl2	0	0	1	1	1	1	1	0	0	unihi	0	0.37551	23	16.5	0	22.6	positive regulation of transcription from RNA polymerase II promoter	circadian rhythm
196	406	AHR	ARNTL	11622	11865	Ahr	Arntl	0	0	1	1	0	0	1	0	0	ext	0.0121611	0	4.8	22.4	0	22.8	positive regulation of transcription from RNA polymerase II promoter	circadian rhythm
2033	9575	EP300	CLOCK	328572	12753	Ep300	Clock	0	0	1	1	0	0	1	0	0	ext	0.0181655	0	5.6	23	0	0.6	positive regulation of transcription from RNA polymerase II promoter	circadian rhythm
2033	4862	EP300	NPAS2	328572	18143	Ep300	Npas2	0	0	1	1	0	0	1	0	0	ext	0.0181655	0	5.6	0.9	0	1.6	positive regulation of transcription from RNA polymerase II promoter	circadian rhythm
2034	56938	EPAS1	ARNTL2	13819	272322	Epas1	Arntl2	0	0	1	1	0	0	1	0	0	ext	0.239529	0.37551	7.4	16.5	0.398957	9.4	positive regulation of transcription from RNA polymerase II promoter	circadian rhythm
3091	5187	HIF1A	PER1	15251	18626	Hif1a	Per1	0	0	1	1	0	0	1	0	0	ext	0.00680597	0	9.6	17.7	0	11.4	positive regulation of transcription from RNA polymerase II promoter	circadian rhythm
1407	8914	CRY1	TIMELESS	12952	21853	Cry1	Timeless	0	0	1	1	1	1	1	0	0	unihi	0	0.300916	19.8	19.6	0	19.8	circadian rhythm	regulation of cell proliferation
1408	8914	CRY2	TIMELESS	12953	21853	Cry2	Timeless	0	0	1	1	1	1	1	0	0	unihi	0.0425479	0.300916	9.2	19.6	0.347146	10.3	circadian rhythm	regulation of cell proliferation
5187	8914	PER1	TIMELESS	18626	21853	Per1	Timeless	0	0	1	1	1	1	1	0	0	unihi	0	0.300916	17.7	19.6	4.89796e-05	12.4	circadian rhythm	regulation of cell proliferation
8864	8914	PER2	TIMELESS	18627	21853	Per2	Timeless	0	0	1	1	1	1	1	0	0	unihi	0	0.300916	20.1	19.6	0	14.4	circadian rhythm	regulation of cell proliferation
406	3091	ARNTL	HIF1A	11865	15251	Arntl	Hif1a	0	0	1	1	0	1	0	0	0	ext	0	0.00680597	22.4	9.6	0	22.4	circadian rhythm	regulation of cell proliferation
406	8850	ARNTL	KAT2B	11865	18519	Arntl	Kat2b	0	0	1	1	0	1	0	0	0	ext	0	0	22.4	8.4	0	22.6	circadian rhythm	regulation of cell proliferation
4862	8850	NPAS2	KAT2B	18143	18519	Npas2	Kat2b	0	0	1	1	0	1	0	0	0	ext	0	0	0.9	8.4	0	1.6	circadian rhythm	regulation of cell proliferation
8914	54962	TIMELESS	TIPIN	21853	66131	Timeless	Tipin	0	0	1	1	0	1	0	0	0	ext	0.300916	0.0858411	19.6	4.5	0.576953	0.3	circadian rhythm	regulation of cell proliferation
1628	9575	DBP	CLOCK	13170	12753	Dbp	Clock	1	0	1	0	1	1	1	0	0	y2h	0	0	10.1	23	0	9.9	regulation of cell proliferation	circadian rhythm
5578	8864	PRKCA	PER2	18750	18627	Prkca	Per2	0	1	0	0	1	1	1	1	0	man	0.00678513	0	7.5	20.1	0	13.6	regulation of cell proliferation	circadian rhythm
1111	8914	CHEK1	TIMELESS	12649	21853	Chek1	Timeless	0	0	1	1	0	0	1	0	0	ext	0.0379367	0.300916	12	19.6	0.12388	14.8	regulation of cell proliferation	circadian rhythm
3091	5187	HIF1A	PER1	15251	18626	Hif1a	Per1	0	0	1	1	0	0	1	0	0	ext	0.00680597	0	9.6	17.7	0	11.4	regulation of cell proliferation	circadian rhythm
8850	9575	KAT2B	CLOCK	18519	12753	Kat2b	Clock	0	0	1	1	0	0	1	0	0	ext	0	0	8.4	23	0	0.3	regulation of cell proliferation	circadian rhythm
1407	9575	CRY1	CLOCK	12952	12753	Cry1	Clock	1	0	1	0	1	1	1	0	0	y2h	0	0	19.8	23	0	20.7	DNA repair	positive regulation of transcription from RNA polymerase II promoter
1407	4862	CRY1	NPAS2	12952	18143	Cry1	Npas2	1	0	1	0	1	1	1	0	0	y2h	0	0	19.8	0.9	0	22.1	DNA repair	positive regulation of transcription from RNA polymerase II promoter
1408	9575	CRY2	CLOCK	12953	12753	Cry2	Clock	1	0	1	0	1	1	1	0	0	y2h	0.0425479	0	9.2	23	0	0	DNA repair	positive regulation of transcription from RNA polymerase II promoter
1408	4862	CRY2	NPAS2	12953	18143	Cry2	Npas2	1	0	1	0	1	1	1	0	0	y2h	0.0425479	0	9.2	0.9	0	1.6	DNA repair	positive regulation of transcription from RNA polymerase II promoter
1454	9575	CSNK1E	CLOCK	27373	12753	Csnk1e	Clock	1	0	1	0	1	1	1	1	0	y2h	0.0768418	0	16.6	23	0	22.4	DNA repair	positive regulation of transcription from RNA polymerase II promoter
1454	6095	CSNK1E	RORA	27373	19883	Csnk1e	Rora	1	0	1	0	1	1	1	1	0	y2h	0.0768418	3.89273e-05	16.6	21.9	0.000136519	20.2	DNA repair	positive regulation of transcription from RNA polymerase II promoter
546	3065	ATRX	HDAC1	22589	433759	Atrx	Hdac1	0	0	1	1	0	0	0	0	0	ext	0.000417919	0.861671	7.3	11.7	0.00019544	7.6	DNA repair	positive regulation of transcription from RNA polymerase II promoter
406	1407	ARNTL	CRY1	11865	12952	Arntl	Cry1	1	0	1	1	1	1	1	0	0	unihi.y2h	0	0	22.4	19.8	0	21.2	positive regulation of transcription from RNA polymerase II promoter	DNA repair
406	1408	ARNTL	CRY2	11865	12953	Arntl	Cry2	1	0	1	0	1	1	1	0	0	y2h	0	0.0425479	22.4	9.2	0	22.5	positive regulation of transcription from RNA polymerase II promoter	DNA repair
406	1454	ARNTL	CSNK1E	11865	27373	Arntl	Csnk1e	1	0	1	1	1	1	1	0	1	unihi.y2h	0	0.0768418	22.4	16.6	0	22.1	positive regulation of transcription from RNA polymerase II promoter	DNA repair
367	4841	AR	NONO	11835	53610	Ar	Nono	0	0	1	1	0	0	1	0	0	ext	0.0132154	0	16.1	4.1	0.0616864	16.1	positive regulation of transcription from RNA polymerase II promoter	DNA repair
1050	1054	CEBPA	CEBPG	12606	12611	Cebpa	Cebpg	0	0	1	1	0	0	0	0	0	ext	0.00801938	0.0139829	7.4	14	0.0242293	9.4	positive regulation of transcription from RNA polymerase II promoter	DNA repair
2033	5111	EP300	PCNA	328572	18538	Ep300	Pcna	0	0	1	1	0	0	0	0	0	ext	0.0181655	0.132719	5.6	15.9	0.029892	6.1	positive regulation of transcription from RNA polymerase II promoter	DNA repair
3065	5111	HDAC1	PCNA	433759	18538	Hdac1	Pcna	0	0	1	1	0	0	0	0	0	ext	0.861671	0.132719	11.7	15.9	0.242357	15.1	positive regulation of transcription from RNA polymerase II promoter	DNA repair

## Sheet: KEGG Fig.6B
KEGG ID	p-value	FDR	Expected Count (no. of genes in category)	Count in extension	Size of KEGG category	Term	Color (singnificance in enrichment)	Font size (no of associated genes)	Symbol human
5200	4.49e-08	2.92e-06	3.81219	17	310	Pathways in cancer	red	36	AKT1,AR,CEBPA,CREBBP,EP300,EPAS1,HDAC1,HDAC2,HIF1A,HSP90AA1,MYC,NOS1,PML,RARA,RXRA,SPI1,STAT3
5221	3.84e-06	0.000124703	0.688653	7	56	Acute myeloid leukemia	red	24	AKT1,CEBPA,MYC,PML,RARA,SPI1,STAT3
4330	9.17e-06	0.000198757	0.51649	6	42	Notch signaling pathway	red	20	CREBBP,EP300,HDAC1,HDAC2,KAT2B,NCOR2
5215	6.75e-05	0.000305	1.05757	7	86	Prostate cancer	red	24	AKT1,AR,CREBBP,EP300,HSP90AA1,CREB3,CREB3L1
5016	0.000115435	0.000402553	1.54947	8	126	Huntington's disease	red	28	CREBBP,EP300,HDAC1,HDAC2,POLR2A,SP1,CREB3,CREB3L1
4110	0.000575442	0.00576856	1.48798	7	121	Cell cycle	orange	24	CHEK1,CREBBP,EP300,HDAC1,HDAC2,MYC,PCNA
4916	0.00062123	0.00576856	1.08217	6	88	Melanogenesis	orange	20	CREBBP,EP300,GNAI1,GNAI2,CREB3,CREB3L1
5211	0.00130722	0.0106212	0.836221	5	68	Renal cell carcinoma	orange	18	AKT1,CREBBP,EP300,EPAS1,HIF1A
4062	0.00537493	0.0317609	2.18893	7	178	Chemokine signaling pathway	orange	24	AKT1,GNAI1,GNAI2,GNB1,PXN,STAT3,VAV1
4670	0.00705613	0.0382207	1.22974	5	100	Leukocyte transendothelial migration	orange	18	GNAI1,GNAI2,PXN,VAV1,VCL
4120	0.0148961	0.0645496	1.47568	5	120	Ubiquitin mediated proteolysis	yellow	18	DDB1,PML,UBE2I,CUL4B,CUL4A
4630	0.0279378	0.100887	1.73393	5	141	Jak-STAT signaling pathway	yellow	18	AKT1,CREBBP,EP300,MYC,STAT3

## Sheet: Dynamic PPIs interactome Fig6D
Entrez gene ID mouse A	Entrez gene ID mouse B	Entrez gene ID human A	Entrez gene ID human B	Symbol human A	Symbol human B	FDR A (rhythmic transcript)	FDR B (rhythmic transcript)	mRNA peak phase A (circadian time)	mRNA peak phase B (circadian time)	FDR PPI (rhythmic expression)	predicted peak phase PPI (circadian time)
232345	20415	2	6462	A2M	SHBG	0.688485	0.733461	16.1	20.5	0.666188	18.4
232345	54343	2	55729	A2M	ATF7IP	0.688485	0.000598939	16.1	2.3	0.00285373	2
232345	17926	2	4653	A2M	MYOC	0.688485	0.258385	16.1	17.8	0.109808	17.3
232345	11816	2	348	A2M	APOE	0.688485	0.183067	16.1	3.2	0.797344	16.6
232345	11699	2	259	A2M	AMBP	0.688485	0.0333259	16.1	1.4	0.830282	20.2
232345	16971	2	4035	A2M	LRP1	0.688485	0.00251211	16.1	4.9	0.00222704	5
232345	12010	2	567	A2M	B2M	0.688485	0.0858402	16.1	19	0.454897	17
232345	13030	2	1508	A2M	CTSB	0.688485	0.0121074	16.1	1.9	0.647994	23.8
232345	13034	2	1510	A2M	CTSE	0.688485	0.0570498	16.1	14.3	0.0805566	14.7
232345	17390	2	4313	A2M	MMP2	0.688485	0.000228768	16.1	3.1	0.0123003	3
232345	16153	2	3586	A2M	IL10	0.688485	0.810764	16.1	12.9	0.648023	14.6
232345	109901	2	1990	A2M	CELA1	0.688485	0.0928336	16.1	1.1	0.112082	0.7
232345	14828	2	3309	A2M	HSPA5	0.688485	0.123255	16.1	21	0.188502	19.9
232345	16176	2	3553	A2M	IL1B	0.688485	0.1117	16.1	18.8	0.15477	18.1
232345	16846	2	3952	A2M	LEP	0.688485	0.532665	16.1	17.4	0.372831	17
232345	18590	2	5154	A2M	PDGFA	0.688485	0.124734	16.1	7.6	0.366939	9.4
232345	18591	2	5155	A2M	PDGFB	0.688485	0.0704205	16.1	18.1	0.0732761	17.7
232345	21810	2	7045	A2M	TGFBI	0.688485	0.0128193	16.1	5.7	0.157432	6.2
232345	11492	2	8728	A2M	ADAM19	0.688485	0.177431	16.1	20.7	0.164788	19.7
232345	11504	2	9510	A2M	ADAMTS1	0.688485	0.1928	16.1	23.5	0.187855	21.9
232345	18049	2	4803	A2M	NGF	0.688485	0.0214478	16.1	18.2	0.0155111	17.7
232345	11749	2	309	A2M	ANXA6	0.688485	0.0261971	16.1	8.2	0.0491096	9.1
232345	56373	2	1361	A2M	CPB2	0.688485	0.114448	16.1	18.1	0.287058	17.1
232345	75622	2	124912	A2M	SPACA3	0.688485	0.0355827	16.1	15.5	0.0476402	15.6
20716	11820	12	351	SERPINA3	APP	0.80085	0.0892676	16.1	2.3	0.357262	1.9
20716	109901	12	1990	SERPINA3	CELA1	0.80085	0.0928336	16.1	1.1	0.0801015	0.8
20716	83995	12	4312	SERPINA3	MMP1	0.80085	0.634055	16.1	11.9	0.546422	13.5
20716	20716	12	12	SERPINA3	SERPINA3	0.80085	0.80085	16.1	16.1	0.744168	16
20716	15407	12	3211	SERPINA3	HOXB1	0.80085	0.473423	16.1	15.1	0.30135	15.5
20716	13418	12	64215	SERPINA3	DNAJC1	0.80085	0.0595414	16.1	22.9	0.0757086	22.3
20716	50701	12	1991	SERPINA3	ELANE	0.80085	0.197646	16.1	15	0.0795655	15.3
20716	18968	12	5422	SERPINA3	POLA1	0.80085	0.163847	16.1	13.7	0.085124	14.1
20716	76701	12	11330	SERPINA3	CTRC	0.80085	0.253626	16.1	19.9	0.204972	18.9
20716	240913	12	9507	SERPINA3	ADAMTS4	0.80085	0.126028	16.1	17.3	0.071601	17.1
11298	18747	15	5566	AANAT	PRKACA	0.0532447	0.00144846	17.5	2.8	0.0237868	0.2
11298	22631	15	7534	AANAT	YWHAZ	0.0532447	0	17.5	2.8	0.0286483	0.2
11298	14061	15	2147	AANAT	F2	0.0532447	0.012353	17.5	3.2	0.155608	20.3
234734	56489	16	9641	AARS	IKBKE	0.0133957	0.505266	2.7	2.7	0.0355264	2.7
268860	214579	18	7915	ABAT	ALDH5A1	0.000123591	0.0122399	3.8	4.2	0.000524572	4.1
268860	268860	18	18	ABAT	ABAT	0.000123591	0.000123591	3.8	3.8	4.0071e-05	3.9
11303	12995	19	1457	ABCA1	CSNK2A1	0.0415241	0.000167929	2.9	6.5	0.000103159	5.4
11303	20648	19	6640	ABCA1	SNTA1	0.0415241	0.762036	2.9	19.9	0.44535	1.2
11303	18747	19	5566	ABCA1	PRKACA	0.0415241	0.00144846	2.9	2.8	0.00149436	2.8
11303	21844	19	7074	ABCA1	TIAM1	0.0415241	0.0885184	2.9	21.4	0.0593711	23.5
11303	18830	19	5360	ABCA1	PLTP	0.0415241	0.0702714	2.9	3.6	0.0165591	3.4
11303	11806	19	335	ABCA1	APOA1	0.0415241	0.607735	2.9	23.7	0.0170339	2.8
11303	53310	19	1741	ABCA1	DLG3	0.0415241	0.00259491	2.9	2.9	0.0001214	2.9
11303	23859	19	1740	ABCA1	DLG2	0.0415241	0.0567179	2.9	15.9	0.571751	17.5
11303	71228	19	9231	ABCA1	DLG5	0.0415241	0.0294393	2.9	3.1	0.00234467	3
11303	17475	19	8777	ABCA1	MPDZ	0.0415241	0	2.9	5.4	1.10742e-06	5
11303	20650	19	6645	ABCA1	SNTB2	0.0415241	0.00938586	2.9	4.5	0.00173266	3.8
11303	14082	19	8772	ABCA1	FADD	0.0415241	0.364923	2.9	0.8	0.0444976	2.1
11303	56524	19	51678	ABCA1	MPP6	0.0415241	0.926079	2.9	16	0.0930139	2.8
11303	22342	19	64130	ABCA1	LIN7B	0.0415241	0.422984	2.9	6.6	0.0653426	4.6
11303	108030	19	8825	ABCA1	LIN7A	0.0415241	0.001786	2.9	18.8	0.0239725	20.9
11303	16885	19	3984	ABCA1	LIMK1	0.0415241	0.30125	2.9	14.4	0.921201	5
11303	69632	19	23365	ABCA1	ARHGEF12	0.0415241	0.00281603	2.9	6	0.00341814	5.2
11303	213498	19	9826	ABCA1	ARHGEF11	0.0415241	0.186564	2.9	1.6	0.0185689	2.3
11303	192786	19	51735	ABCA1	RAPGEF6	0.0415241	0	2.9	5.5	1.07701e-06	4.7
11303	59020	19	5174	ABCA1	PDZK1	0.0415241	0.149485	2.9	15.3	0.36965	2.6
11303	243961	19	50944	ABCA1	SHANK1	0.0415241	0.148613	2.9	16.6	0.712992	21.7
11303	22343	19	55327	ABCA1	LIN7C	0.0415241	0	2.9	14.1	0.000217253	13.6
11303	94221	19	57120	ABCA1	GOPC	0.0415241	0.296541	2.9	6.2	0.0653001	4.1
11303	53318	19	27295	ABCA1	PDLIM3	0.0415241	0.575298	2.9	14.4	0.877391	4.1
11303	12914	19	1387	ABCA1	CREBBP	0.0415241	0.000545079	2.9	3.6	0.000276801	3.5
11303	13528	19	1838	ABCA1	DTNB	0.0415241	0.313407	2.9	5.9	0.0374322	4.6
11306	14151	22	2235	ABCB7	FECH	0.334974	0.000725846	19.3	10.9	0.452686	17.5
11306	17869	22	4609	ABCB7	MYC	0.334974	0.489556	19.3	16.7	0.0709325	18.3
11350	11820	25	351	ABL1	APP	0.292145	0.0892676	4.9	2.3	0.0998348	3.3
11350	83767	25	8936	ABL1	WASF1	0.292145	0.195537	4.9	17.6	0.809838	18.4
11350	16332	25	3636	ABL1	INPPL1	0.292145	0.69729	4.9	22.4	0.56571	3.1
11350	12568	25	1020	ABL1	CDK5	0.292145	0.0041151	4.9	18.6	0.483306	21.3
11350	15170	25	5777	ABL1	PTPN6	0.292145	0.0129546	4.9	0.7	0.0316782	1.7
11350	22062	25	7161	ABL1	TP73	0.292145	0.00158821	4.9	17.3	0.199492	17.6
11350	17246	25	4193	ABL1	MDM2	0.292145	0.047413	4.9	1.8	0.0458065	3.2
11350	12189	25	672	ABL1	BRCA1	0.292145	0.00408704	4.9	16.1	0.173269	15.5
11350	15162	25	3055	ABL1	HCK	0.292145	0.142131	4.9	19.1	0.511121	20.8
11350	16452	25	3717	ABL1	JAK2	0.292145	4.62574e-05	4.9	5.2	0.000600105	5.1
11350	16476	25	3725	ABL1	JUN	0.292145	0.512021	4.9	13.4	0.672225	11.7
11350	20779	25	6714	ABL1	SRC	0.292145	0.0294353	4.9	14.1	0.0960903	11.5
11350	11459	25	58	ABL1	ACTA1	0.292145	0.544256	4.9	3.7	0.294905	3.9
11350	12478	25	930	ABL1	CD19	0.292145	0.382257	4.9	19.1	0.579621	0.9
11350	14784	25	2885	ABL1	GRB2	0.292145	0.0710189	4.9	3.3	0.0631055	3.9
11350	12266	25	718	ABL1	C3	0.292145	0.0284632	4.9	3.7	0.0534431	4.2
11350	218397	25	5921	ABL1	RASA1	0.292145	0.000427211	4.9	9.3	0.00559119	7.6
11350	76954	25	6764	ABL1	ST5	0.292145	0	4.9	23.9	0	0.2
11350	14375	25	2547	ABL1	XRCC6	0.292145	0.00302263	4.9	18.7	0.624246	22.5
11350	17762	25	4137	ABL1	MAPT	0.292145	0.0594559	4.9	14.6	0.396033	12.3
11350	11352	25	27	ABL1	ABL2	0.292145	0.0254076	4.9	3.9	0.0221548	4.2
11350	19886	25	6098	ABL1	ROS1	0.292145	0.104267	4.9	14.1	0.292708	11.8
11350	12402	25	867	ABL1	CBL	0.292145	0.0376477	4.9	3.5	0.0454707	4
11350	18708	25	5295	ABL1	PIK3R1	0.292145	0.000446117	4.9	14.5	0.0812874	13.6
11350	18803	25	5335	ABL1	PLCG1	0.292145	0.000304628	4.9	8.1	0.00481384	7.4
11350	22637	25	7535	ABL1	ZAP70	0.292145	6.46726e-05	4.9	12.2	0.000388371	10.4
11350	19645	25	5925	ABL1	RB1	0.292145	5.7241e-06	4.9	5.2	0.000331763	5.2
11350	18760	25	5587	ABL1	PRKD1	0.292145	0.080029	4.9	12.1	0.151794	9.8
11350	11350	25	25	ABL1	ABL1	0.292145	0.292145	4.9	4.9	0.20873	5
11350	12229	25	695	ABL1	BTK	0.292145	0.274432	4.9	14.8	0.74031	11.2
11350	17973	25	4690	ABL1	NCK1	0.292145	0.00289102	4.9	18.1	0.0836914	19
11350	26411	25	11184	ABL1	MAP4K1	0.292145	0.249781	4.9	12.4	0.1322	9
11350	12929	25	1399	ABL1	CRKL	0.292145	0.0263541	4.9	20	0.10977	21.1
11350	12371	25	842	ABL1	CASP9	0.292145	0.0164928	4.9	17.4	0.963943	23.9
11350	19367	25	5883	ABL1	RAD9A	0.292145	0.0752445	4.9	18.3	0.803857	22.7
11350	19200	25	9051	ABL1	PSTPIP1	0.292145	0.911859	4.9	19.3	0.650832	3.9
11350	11920	25	472	ABL1	ATM	0.292145	0.0139675	4.9	6.8	0.00769102	6.2
11350	11308	25	10006	ABL1	ABI1	0.292145	1.5932e-05	4.9	6	0.00453222	5.6
11350	19365	25	5893	ABL1	RAD52	0.292145	0.534777	4.9	20.7	0.604943	1.3
11350	12389	25	857	ABL1	CAV1	0.292145	0.207374	4.9	18	0.720413	20.4
11350	73178	25	8976	ABL1	WASL	0.292145	0.00660397	4.9	6.5	0.0169087	6
11350	19876	25	6091	ABL1	ROBO1	0.292145	0.0322334	4.9	3.7	0.0132429	4
11350	22034	25	7189	ABL1	TRAF6	0.292145	0.123213	4.9	8	0.0559605	6.6
11350	13194	25	1642	ABL1	DDB1	0.292145	0.445109	4.9	6.2	0.243046	5.6
11350	107986	25	1643	ABL1	DDB2	0.292145	0.0145744	4.9	7	0.0115084	6.5
11350	21752	25	7015	ABL1	TERT	0.292145	0.000778876	4.9	6.2	0.00112201	6.1
11350	12576	25	1027	ABL1	CDKN1B	0.292145	6.11496e-05	4.9	1	0.000126769	1.6
11350	12534	25	983	ABL1	CDC2	0.292145	1.51439e-05	4.9	14.6	0.00236532	13.8
11350	19361	25	5888	ABL1	RAD51	0.292145	0.105182	4.9	18.8	0.557776	20.7
11350	22059	25	7157	ABL1	TP53	0.292145	0.0699496	4.9	1.9	0.054619	2.7
11350	18211	25	4914	ABL1	NTRK1	0.292145	0.349293	4.9	16.8	0.991216	5.6
11350	19724	25	5989	ABL1	RFX1	0.292145	0.0752589	4.9	2.9	0.0566799	3.6
11350	19248	25	5782	ABL1	PTPN12	0.292145	0	4.9	6.5	0.000493394	6
11350	226999	25	6549	ABL1	SLC9A2	0.292145	0.115376	4.9	14.4	0.476874	11.8
11350	19090	25	5591	ABL1	PRKDC	0.292145	0.00134379	4.9	2.5	0.00424022	3.1
11350	13844	25	2048	ABL1	EPHB2	0.292145	0.0816485	4.9	15.3	0.561113	12.4
11350	22141	25	7275	ABL1	TUB	0.292145	0.252618	4.9	14.5	0.635123	10.8
11350	30948	25	274	ABL1	BIN1	0.292145	0.226153	4.9	17.9	0.868795	0.4
11350	24055	25	6452	ABL1	SH3BP2	0.292145	0.0140914	4.9	6.7	0.016719	6.3
11350	19303	25	5829	ABL1	PXN	0.292145	0.000775925	4.9	4.4	0.00433507	4.6
11350	11785	25	322	ABL1	APBB1	0.292145	0.042331	4.9	18.1	0.708197	20
11350	14814	25	2906	ABL1	GRIN2D	0.292145	0.179218	4.9	15.5	0.681318	13.1
11350	13448	25	1796	ABL1	DOK1	0.292145	0.128795	4.9	17	0.868934	17.5
11350	12927	25	9564	ABL1	BCAR1	0.292145	0	4.9	6	9.48188e-05	5.8
11350	399510	25	11183	ABL1	MAP4K5	0.292145	0.171722	4.9	13.1	0.36655	10.1
11350	224105	25	5062	ABL1	PAK2	0.292145	0.0341136	4.9	5	0.0412259	5
11350	59287	25	23385	ABL1	NCSTN	0.292145	0.368382	4.9	4.1	0.218101	4.5
11350	20411	25	10580	ABL1	SORBS1	0.292145	0	4.9	7	6.44917e-06	6.7
11350	11490	25	8751	ABL1	ADAM15	0.292145	0.107148	4.9	17.8	0.835099	20.7
11350	94212	25	55824	ABL1	PAG1	0.292145	0.238583	4.9	13	0.406051	9
11350	225870	25	9610	ABL1	RIN1	0.292145	0.471873	4.9	19.6	0.508674	2.7
11350	19253	25	26469	ABL1	PTPN18	0.292145	0.06007	4.9	15.6	0.504657	13.8
11350	329165	25	10152	ABL1	ABI2	0.292145	0.069995	4.9	5.9	0.0231269	5.6
11350	20020	25	5430	ABL1	POLR2A	0.292145	0.00288897	4.9	6	0.00556581	5.7
11350	231386	25	91746	ABL1	YTHDC1	0.292145	0.0174634	4.9	3	0.0179889	3.8
11350	18003	25	4739	ABL1	NEDD9	0.292145	0.142119	4.9	1.8	0.0524203	3
11350	234214	25	8470	ABL1	SORBS2	0.292145	0	4.9	1.3	0.000217217	2
11350	252966	25	81928	ABL1	CABLES2	0.292145	0.312612	4.9	3.8	0.185089	4.3
11350	20420	25	56961	ABL1	SHD	0.292145	0.14696	4.9	16.3	0.939633	13
11350	74168	25	84287	ABL1	ZDHHC16	0.292145	0.0721311	4.9	16.7	0.997428	8.1
11350	63955	25	91768	ABL1	CABLES1	0.292145	0.239819	4.9	16.3	0.958964	7
11350	27261	25	79930	ABL1	DOK3	0.292145	0.393256	4.9	17.5	0.53891	4.5
11350	214547	25	126669	ABL1	SHE	0.292145	0.505294	4.9	3.7	0.125907	4.3
11350	20416	25	6464	ABL1	SHC1	0.292145	0.106975	4.9	1.8	0.0819197	3.2
11350	56353	25	23429	ABL1	RYBP	0.292145	0.0170088	4.9	7.3	0.0230598	6.5
11350	12912	25	1385	ABL1	CREB1	0.292145	0.00808901	4.9	16.7	0.0715338	16.6
11350	12359	25	847	ABL1	CAT	0.292145	0.0190982	4.9	3.4	0.070092	4.4
11350	20401	25	23616	ABL1	SH3BP1	0.292145	0.597094	4.9	16.4	0.79688	5.4
11350	14783	25	2887	ABL1	GRB10	0.292145	0.00143006	4.9	20	0.0333686	21
11350	20662	25	6654	ABL1	SOS1	0.292145	0.020314	4.9	0.1	0.0364221	1.5
11350	22628	25	7532	ABL1	YWHAG	0.292145	0.0911761	4.9	19	0.179848	19.4
11350	22631	25	7534	ABL1	YWHAZ	0.292145	0	4.9	2.8	0.00136391	3.5
11350	22627	25	7531	ABL1	YWHAE	0.292145	0.240908	4.9	10.2	0.142869	7.3
11350	22629	25	7533	ABL1	YWHAH	0.292145	0.00833216	4.9	20.1	0.446608	22.6
11350	54401	25	7529	ABL1	YWHAB	0.292145	0.0080825	4.9	3.6	0.060778	4.3
11350	55948	25	2810	ABL1	SFN	0.292145	0.719148	4.9	2.6	0.198396	4.2
11350	21749	25	7013	ABL1	TERF1	0.292145	0.000331508	4.9	5.2	8.85362e-05	5.1
76507	14163	26	2245	ABP1	FGD1	0.27695	0.17138	14.7	20.9	0.187699	18.1
76507	13430	26	1785	ABP1	DNM2	0.27695	0.010926	14.7	18.6	0.0183785	17
76507	13142	26	1610	ABP1	DAO	0.27695	0.045038	14.7	16	0.0168457	15.4
11352	15162	27	3055	ABL2	HCK	0.0254076	0.142131	3.9	19.1	0.243849	23.3
11352	13844	27	2048	ABL2	EPHB2	0.0254076	0.0816485	3.9	15.3	0.522671	5.3
11352	12359	27	847	ABL2	CAT	0.0254076	0.0190982	3.9	3.4	0.00185883	3.8
11352	30954	27	10572	ABL2	SIVA1	0.0254076	0.0112747	3.9	20.5	0.025598	0.4
11352	234214	27	8470	ABL2	SORBS2	0.0254076	0	3.9	1.3	1.63077e-05	2.1
11352	11352	27	27	ABL2	ABL2	0.0254076	0.0254076	3.9	3.9	0.0114447	3.8
11352	329165	27	10152	ABL2	ABI2	0.0254076	0.069995	3.9	5.9	0.0082628	4.8
11352	225870	27	9610	ABL2	RIN1	0.0254076	0.471873	3.9	19.6	0.0314915	2.8
109934	11549	29	148	ABR	ADRA1A	0.996712	0.583157	21.7	6.3	0.704176	6
100705	108079	32	5563	ACACB	PRKAA2	1.48957e-05	0.657209	22.8	13.6	0.00210293	22.5
11364	11364	34	34	ACADM	ACADM	0.000985626	0.000985626	8.6	8.6	0.000415105	8.6
11370	11370	37	37	ACADVL	ACADVL	0.134246	0.134246	4.8	4.8	0.080807	4.8
11370	12550	37	999	ACADVL	CDH1	0.134246	0	4.8	1.5	5.89855e-06	1.7
110446	268395	38	4350	ACAT1	MPG	0.0712357	0	7.6	6.6	0	6.7
110460	12591	39	1045	ACAT2	CDX2	0	0.369624	22.2	19.3	6.69942e-05	21.4
110460	110460	39	39	ACAT2	ACAT2	0	0	22.2	22.2	0	22.2
110460	12995	39	1457	ACAT2	CSNK2A1	0	0.000167929	22.2	6.5	0.00255349	2.7
110460	12427	39	8900	ACAT2	CCNA1	0	0.135087	22.2	19.2	4.59658e-05	21.1
110460	19079	39	5564	ACAT2	PRKAB1	0	0.0329343	22.2	3.5	0.000341306	0.2
110460	22034	39	7189	ACAT2	TRAF6	0	0.123213	22.2	8	0.0643688	23.9
110460	54632	39	24140	ACAT2	FTSJ1	0	3.88601e-05	22.2	18.2	0	20.6
110460	22333	39	7416	ACAT2	VDAC1	0	0.267905	22.2	12.7	0.000612903	21.6
110460	11793	39	9474	ACAT2	ATG5	0	0.0895652	22.2	5.2	0.0010799	0.2
11418	18693	40	9463	ACCN1	PICK1	0.0187048	0.00203682	15.7	3.3	0.371082	2.7
11418	13830	40	2040	ACCN1	STOM	0.0187048	0	15.7	4.5	0.0920663	5.7
11418	11419	40	41	ACCN1	ACCN2	0.0187048	0.0729103	15.7	16.7	0.00350489	16.1
11418	69106	40	9399	ACCN1	STOML1	0.0187048	0.273124	15.7	4.4	0.686966	14.4
11419	18747	41	5566	ACCN2	PRKACA	0.0729103	0.00144846	16.7	2.8	0.0479675	1.4
11419	18693	41	9463	ACCN2	PICK1	0.0729103	0.00203682	16.7	3.3	0.112215	2.2
11419	13830	41	2040	ACCN2	STOM	0.0729103	0	16.7	4.5	0.00323244	4.4
11419	11419	41	41	ACCN2	ACCN2	0.0729103	0.0729103	16.7	16.7	0.0380336	16.7
11419	69106	41	9399	ACCN2	STOML1	0.0729103	0.273124	16.7	4.4	0.987565	20.4
11423	11423	43	43	ACHE	ACHE	0.0784738	0.0784738	17.9	17.9	0.0398469	17.9
11423	16777	43	3912	ACHE	LAMB1	0.0784738	0.00182395	17.9	3.3	0.199039	0.7
11423	11820	43	351	ACHE	APP	0.0784738	0.0892676	17.9	2.3	0.285697	22.3
11423	12826	43	1282	ACHE	COL4A1	0.0784738	0	17.9	3.5	7.27802e-07	3.1
11423	16865	43	1939	ACHE	LGTN	0.0784738	0	17.9	7.3	0.290624	9.7
11423	15110	43	9421	ACHE	HAND1	0.0784738	0.0270664	17.9	16.6	0.0018966	17.2
11423	382864	43	8292	ACHE	COLQ	0.0784738	0.645736	17.9	16.7	0.0641947	17.5
11423	170952	43	145270	ACHE	PRIMA1	0.0784738	0.136718	17.9	16.4	0.00444717	17.3
104112	18747	47	5566	ACLY	PRKACA	5.76701e-06	0.00144846	20.9	2.8	0.000100869	22.1
104112	56637	47	2932	ACLY	GSK3B	5.76701e-06	0.0032	20.9	3.5	0.00109687	22.5
104112	104112	47	47	ACLY	ACLY	5.76701e-06	5.76701e-06	20.9	20.9	2.20167e-06	20.8
104112	209446	47	7030	ACLY	TFE3	5.76701e-06	0.032528	20.9	4	0.000175292	21.6
104112	19079	47	5564	ACLY	PRKAB1	5.76701e-06	0.0329343	20.9	3.5	0.000414986	21.7
104112	56489	47	9641	ACLY	IKBKE	5.76701e-06	0.505266	20.9	2.7	0.000145384	21.4
104112	12427	47	8900	ACLY	CCNA1	5.76701e-06	0.135087	20.9	19.2	7.40192e-07	20.6
104112	11845	47	382	ACLY	ARF6	5.76701e-06	0.0393344	20.9	18.6	7.59713e-05	20.2
104112	22346	47	7428	ACLY	VHL	5.76701e-06	0.114815	20.9	18.4	1.90193e-05	20.3
104112	29815	47	8412	ACLY	BCAR3	5.76701e-06	1.96947e-05	20.9	1.4	1.35807e-05	22.2
104112	12578	47	1029	ACLY	CDKN2A	5.76701e-06	0.468465	20.9	13.6	2.12333e-05	20.5
11434	268591	49	5104	ACR	SERPINA5	0.0188416	0.000200323	15.8	17.9	5.66651e-05	17
11434	22787	49	7783	ACR	ZP2	0.0188416	0.105167	15.8	16.3	0.00237129	16
11434	22788	49	7784	ACR	ZP3	0.0188416	0.684577	15.8	18.8	0.05577	16.5
11430	20280	51	6342	ACOX1	SCP2	0.0131145	0.0319375	5.7	22.2	0.00578671	5.6
11433	14735	54	2239	ACP5	GPC4	0.260883	0.0120172	0.9	3.7	0.0254586	3.1
11433	20750	54	6696	ACP5	SPP1	0.260883	0.193732	0.9	1.4	0.00133454	1.2
56318	20415	55	6462	ACPP	SHBG	2.74725e-05	0.733461	4.3	20.5	8.14815e-06	4
56318	56318	55	55	ACPP	ACPP	2.74725e-05	2.74725e-05	4.3	4.3	1.46294e-05	4.4
11459	14473	58	2638	ACTA1	GC	0.544256	0.0215914	3.7	15.5	0.49669	3.7
11459	18754	58	5581	ACTA1	PRKCE	0.544256	0.0317508	3.7	8.4	0.25075	5.5
11459	107589	58	4638	ACTA1	MYLK	0.544256	0.0297734	3.7	4.9	0.136496	4.2
11459	14086	58	6624	ACTA1	FSCN1	0.544256	0.0114035	3.7	2.8	0.0164367	3.1
11459	70292	58	60312	ACTA1	AFAP1	0.544256	0.0130434	3.7	1.8	0.133864	2.9
11459	22349	58	7429	ACTA1	VIL1	0.544256	0.180579	3.7	3.5	0.242868	3.6
11459	17754	58	4130	ACTA1	MAP1A	0.544256	0.0602669	3.7	16.5	0.763446	3.1
11459	110784	58	4306	ACTA1	NR3C2	0.544256	0	3.7	7.2	0.00886555	6
11459	22323	58	7408	ACTA1	VASP	0.544256	0.319809	3.7	0.7	0.241765	2.8
11459	18805	58	5337	ACTA1	PLD1	0.544256	0	3.7	1.3	0.0407173	2.3
11459	234686	58	29109	ACTA1	FHOD1	0.544256	0.123188	3.7	3.1	0.208937	3.5
11459	13419	58	1773	ACTA1	DNASE1	0.544256	0.210574	3.7	11.9	0.565798	5.2
11459	227753	58	2934	ACTA1	GSN	0.544256	0.000733496	3.7	4.2	0.0680453	3.9
11459	22288	58	7402	ACTA1	UTRN	0.544256	0.00174635	3.7	6.9	0.161336	5.1
11459	13383	58	1739	ACTA1	DLG1	0.544256	0	3.7	5.9	0.0653748	4.8
11459	224796	58	53405	ACTA1	CLIC5	0.544256	0.00443119	3.7	18.7	0.69163	0.5
11459	18753	58	5580	ACTA1	PRKCD	0.544256	0.024976	3.7	5	0.191517	4.1
11459	19353	58	5879	ACTA1	RAC1	0.544256	0.197459	3.7	3.3	0.284612	3.6
11459	13649	58	1956	ACTA1	EGFR	0.544256	0.0239388	3.7	4.9	0.115379	4.2
11459	11459	58	58	ACTA1	ACTA1	0.544256	0.544256	3.7	3.7	0.447378	3.8
11459	13405	58	1756	ACTA1	DMD	0.544256	0	3.7	15.4	0.935361	4.4
11459	11566	58	159	ACTA1	ADSS	0.544256	0.000281983	3.7	17.7	0.595967	3.1
11459	269587	58	2035	ACTA1	EPB41	0.544256	0.00201553	3.7	10.1	0.388941	6
11459	228550	58	3706	ACTA1	ITPKA	0.544256	0.152724	3.7	12.9	0.630224	4.9
11459	17901	58	4632	ACTA1	MYL1	0.544256	0.613806	3.7	4.7	0.474675	4.1
11459	13043	58	2017	ACTA1	CTTN	0.544256	0.000561395	3.7	6.3	0.120631	4.8
11459	22324	58	7409	ACTA1	VAV1	0.544256	0.626097	3.7	21.9	0.474502	2.8
11459	20193	58	6271	ACTA1	S100A1	0.544256	0.0387034	3.7	16.8	0.698418	3.2
11459	18750	58	5578	ACTA1	PRKCA	0.544256	0.00678513	3.7	7.5	0.220896	5
11459	19157	58	9267	ACTA1	CYTH1	0.544256	0	3.7	9.3	0.166661	6.7
11459	21894	58	7094	ACTA1	TLN1	0.544256	0.00199572	3.7	3.7	0.0917412	3.7
11459	21952	58	7135	ACTA1	TNNI1	0.544256	0.078878	3.7	17.3	0.771792	2.3
11459	22059	58	7157	ACTA1	TP53	0.544256	0.0699496	3.7	1.9	0.14595	2.9
11459	16398	58	3673	ACTA1	ITGA2	0.544256	0.262325	3.7	18	0.683265	2.4
11459	22330	58	7414	ACTA1	VCL	0.544256	0.00391224	3.7	0.4	0.111605	2.1
11459	13860	58	2059	ACTA1	EPS8	0.544256	0.0382653	3.7	3.3	0.132914	3.5
11459	12797	58	1264	ACTA1	CNN1	0.544256	0.716667	3.7	11.9	0.599324	4.4
11459	21345	58	6876	ACTA1	TAGLN	0.544256	0.546878	3.7	4.7	0.376997	3.8
11459	17920	58	4646	ACTA1	MYO6	0.544256	2.71125e-05	3.7	5.7	0.0466098	4.8
11459	21872	58	7082	ACTA1	TJP1	0.544256	0.0169155	3.7	4.3	0.11944	3.9
11459	12388	58	1500	ACTA1	CTNND1	0.544256	0.00368349	3.7	2.8	0.0767036	3.3
11459	13527	58	1837	ACTA1	DTNA	0.544256	0.16077	3.7	15.4	0.754605	3.8
11459	15163	58	3059	ACTA1	HCLS1	0.544256	0.22891	3.7	19	0.597827	2.6
11459	17909	58	4651	ACTA1	MYO10	0.544256	0.0455338	3.7	4	0.072589	3.9
11459	22031	58	7187	ACTA1	TRAF3	0.544256	0.00780913	3.7	23.6	0.131043	1.6
11459	29856	58	6525	ACTA1	SMTN	0.544256	0.340342	3.7	2.9	0.317406	3.5
11459	17925	58	4650	ACTA1	MYO9B	0.544256	0.00983633	3.7	5.9	0.151095	4.6
11459	18479	58	5058	ACTA1	PAK1	0.544256	0.105711	3.7	10.1	0.453325	5
11459	14453	58	2620	ACTA1	GAS2	0.544256	0.182499	3.7	0.8	0.347341	3.1
11459	18260	58	4950	ACTA1	OCLN	0.544256	1.63132e-05	3.7	4.5	0.0159447	4.2
11459	29875	58	8826	ACTA1	IQGAP1	0.544256	0.00263825	3.7	2.3	0.105888	3.1
11459	236899	58	9468	ACTA1	PCYT1B	0.544256	0.249075	3.7	15.3	0.83069	4
11459	20743	58	6712	ACTA1	SPTBN2	0.544256	0	3.7	6.7	0.136124	5
11459	235431	58	10391	ACTA1	CORO2B	0.544256	0.00633567	3.7	15.8	0.996795	1.4
11459	71819	58	9493	ACTA1	KIF23	0.544256	0.171492	3.7	9.3	0.433324	5.1
[truncated: 30,131 more rows]

## Sheet: Processes network F6D
GO ID A	GO ID B	GO A	GO B	Number of proteins in A	Number of proteins in B	p-value for overrepresentation of dynamic PPI	Number of dynamic PPI between A and B	Total number of PPI between A and B
[truncated: 89 more rows]

[truncated: 2 more sheets: Process network interactome FS5, Dyn. degree interactome F6D]
